# Supplementary material
Source: publisher figshare collection journal article supplement (https://asha.figshare.com/articles/dataset/_/15057345)

**Supplemental Material S2: Voice maps and electoglottographic wave shapes for all participants from the voice range profile task on vowel /a/.** For all participants, the voice range profile (VRP) was obtained on the vowel /a/. The participants were 13 adult males, 13 adult females, 11 girls and 9 boys. Each page shows the data for one participant.

A cell is included here if at least five electrolottography (EGG) cycles occurred in it. The maps show the Cell-Mean of the given EGG parameter on a color scale. The **black grid** shows the participant's gamma ( $\Gamma$ ) region which was derived from the participant's SRP, and is taken to define the most representative core of the habitual *speech* range.

The six panels starting from top left to right (1-3) and bottom left to right (4-6) on each page show the following:

1. The Cell-Mean of the quotient of contact by integration  $Q_{ci}$ , a measure of the relative amount of contacting.
2. The Cell-Mean of the normalized peak dEGG amplitude quotient  $Q_{\Delta}$ , a measure of the maximum rate of change in contact area over a cycle. Its minimum is 1, corresponding to a sinusoidal EGG.
3. The Cell-Means of the quotient of speed by integration  $Q_{si}$ , a measure of the asymmetry of the contact phase. The value 1 represents a symmetrical contact phase, >1 means the pulse is skewed to the left.
4. The Cell-Means of the cycle-rate sample entropy CSE, a measure of the disorder in successive EGG wave shapes. The pale cyan color signifies that all cycles in the cell received the value zero; they were below the threshold of the Sample Entropy computation. This indicates very stable phonation.
5. The distribution of five EGG wave shapes as obtained by 5-way clustering of this participant's productions.
6. The EGG wave shapes corresponding to those five clusters, each a concatenation of 4 identical pulses for visual clarity. The EGG parameters are annotated on each wave shape as  $Q_{ci}$ ,  $/Q_{\Delta}$  and  $\leftrightarrow Q_{si}$  where  $/$ =slope and  $\leftrightarrow$ =asymmetry.

The dependent variables  $Q_{ci}$ -M,  $Q_{\Delta}$ -M,  $Q_{si}$ -M and CSE-M for the vowel task are the means within the  $\Gamma$  region of the respective Cell-Means listed above. Similarly, the dependent variables  $Q_{ci}$ -SD,  $Q_{\Delta}$ -SD and  $Q_{si}$ -SD for the vowel task are the means of the Cell-SDs (not shown here) of the VRP data within the  $\Gamma$  region.

The color scale tick values show how the Cell-Mean of the parameter is mapped to a color. For the  $Q_{\Delta}$  and  $Q_{si}$  parameters, the tick spacing is logarithmic only to provide visual contrast.

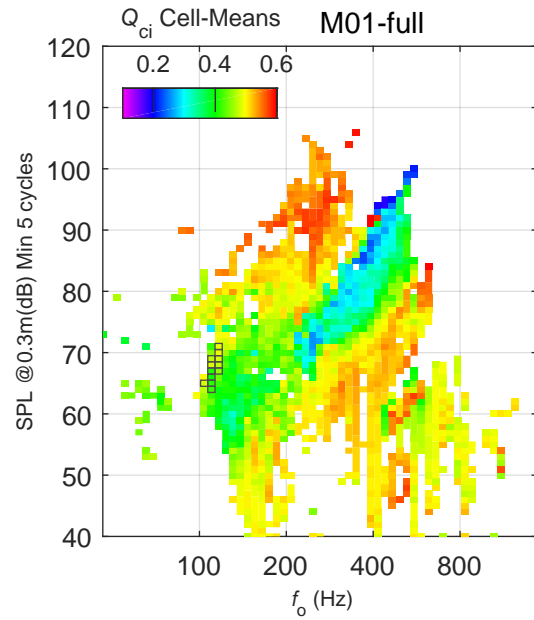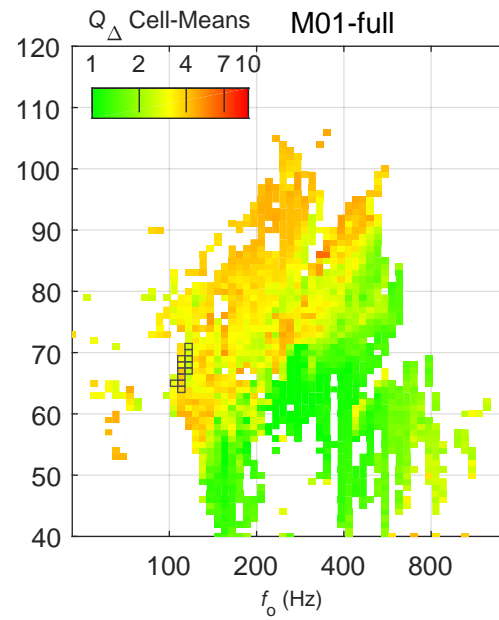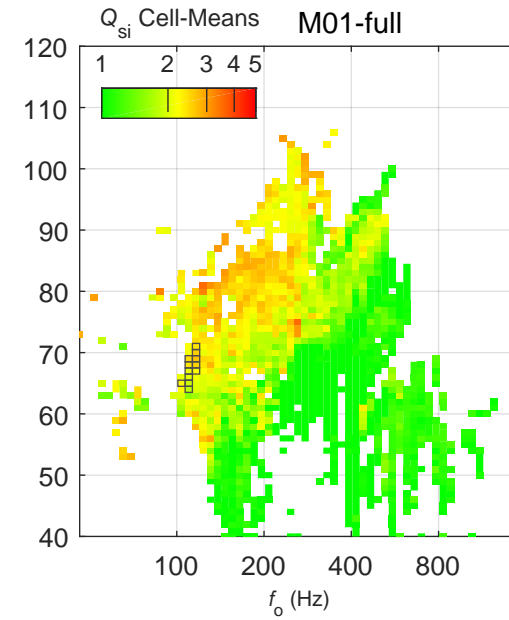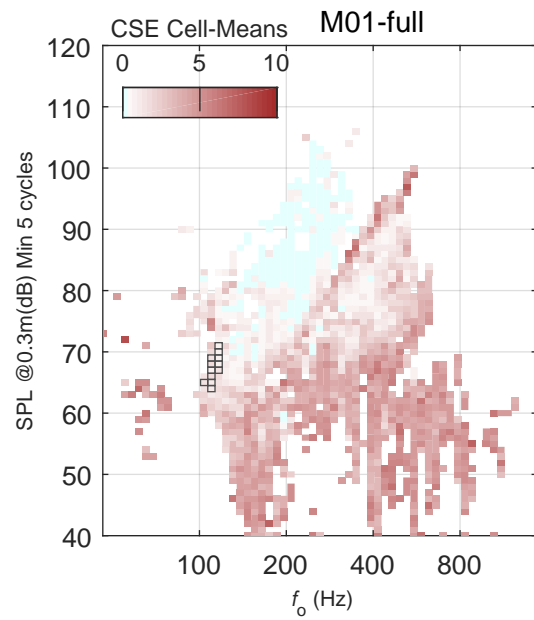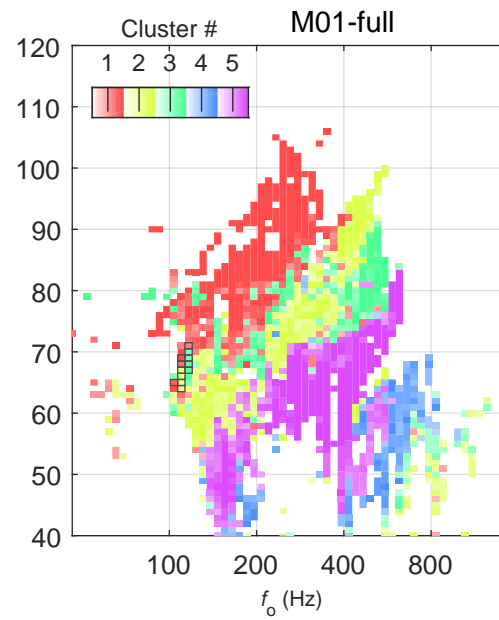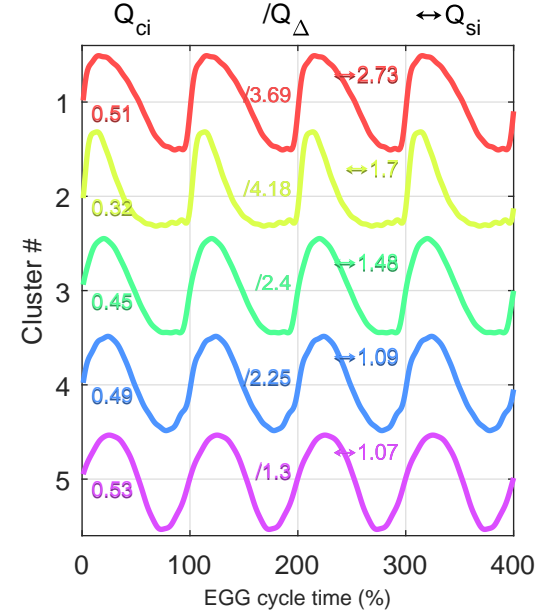

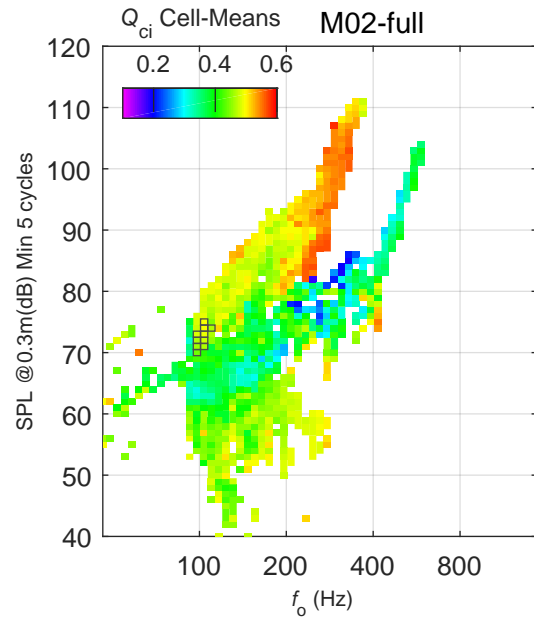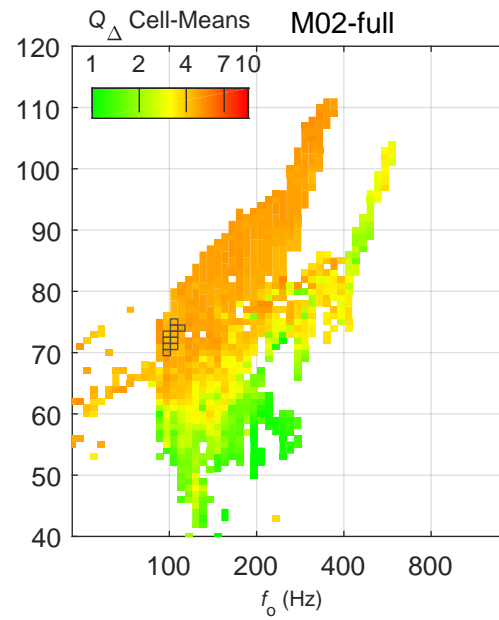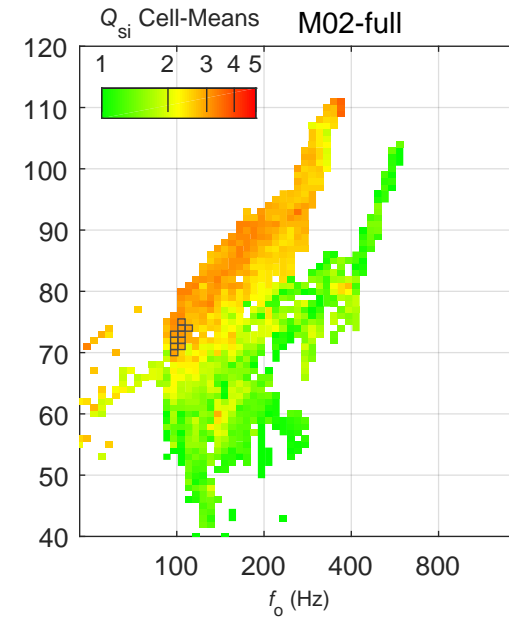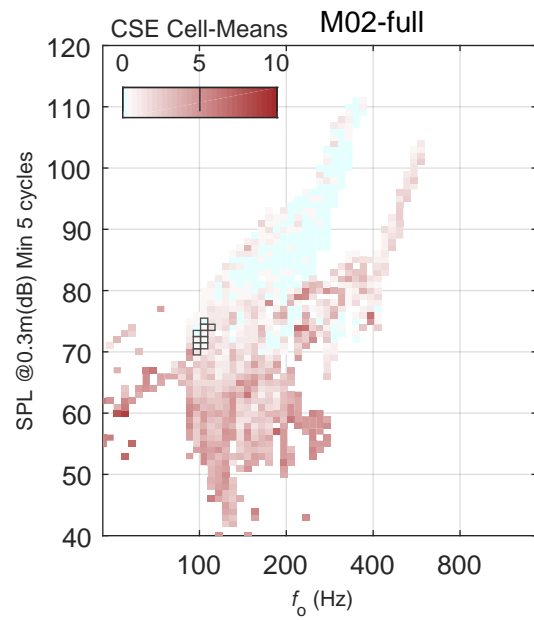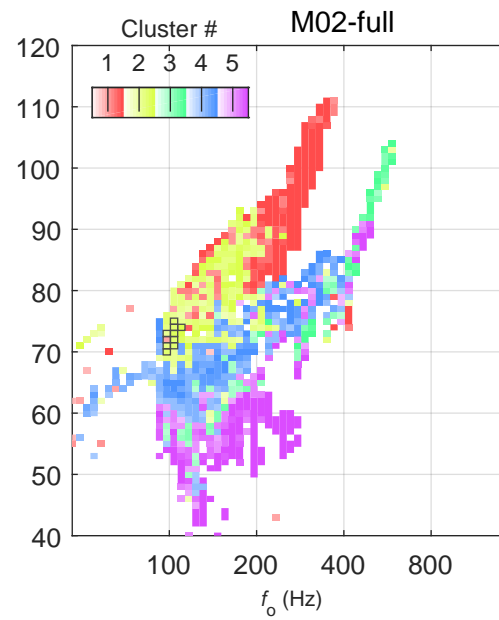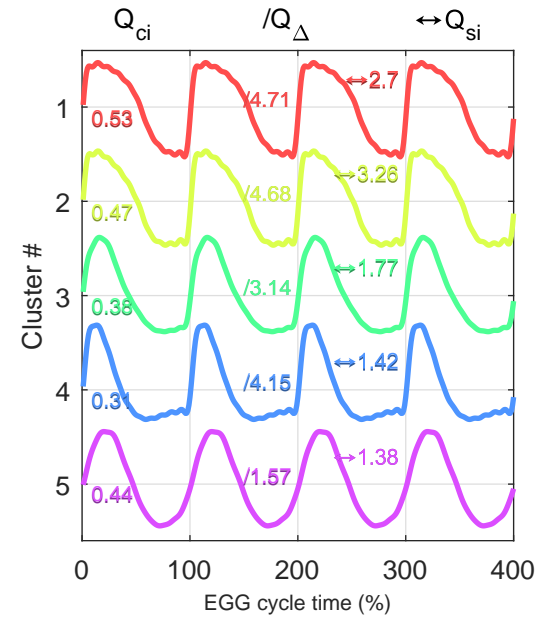

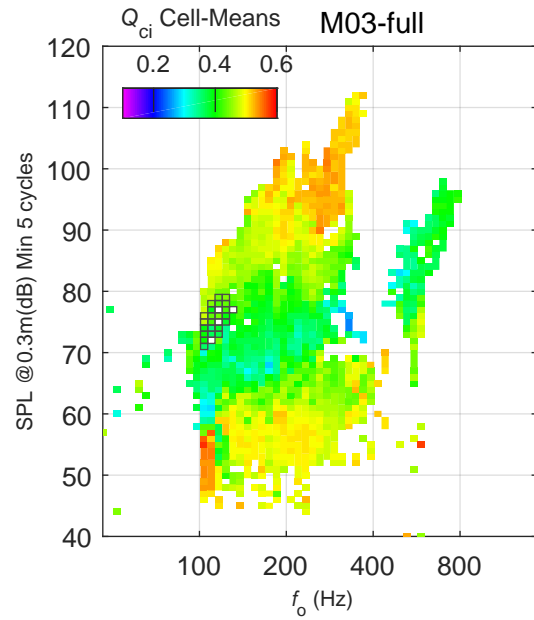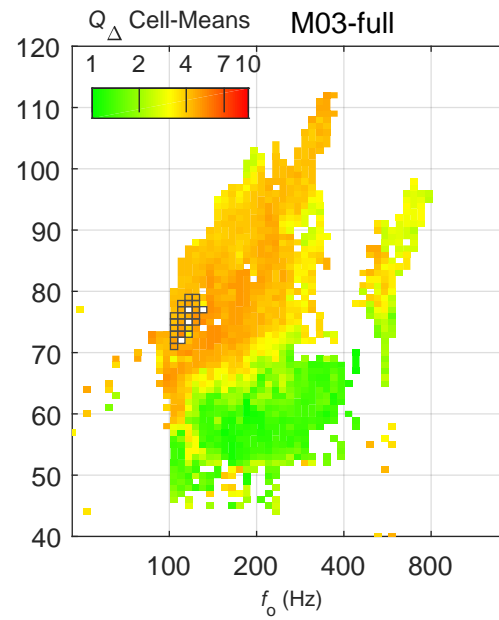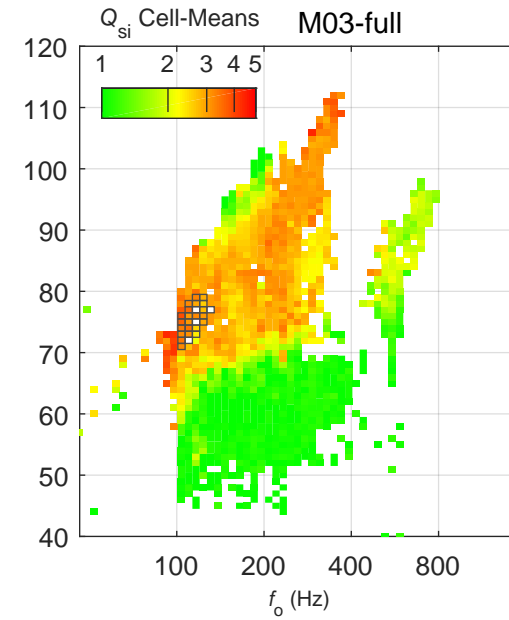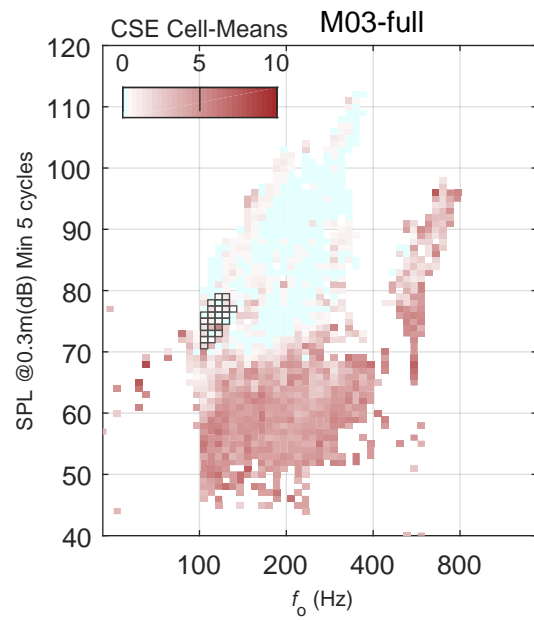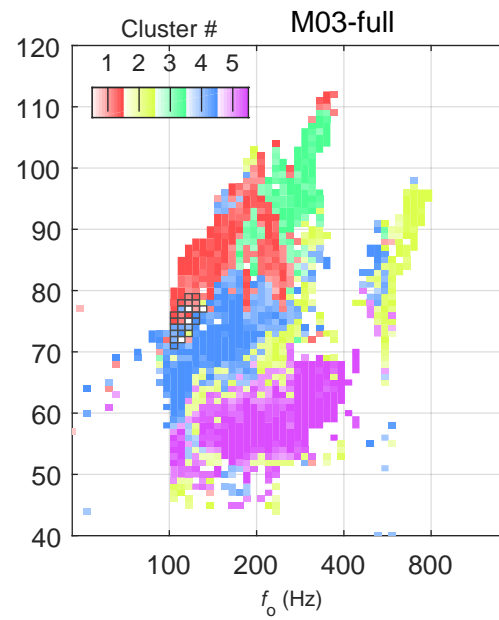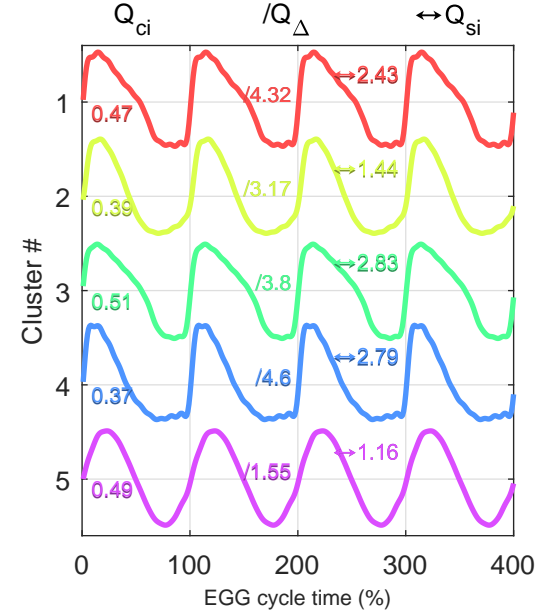



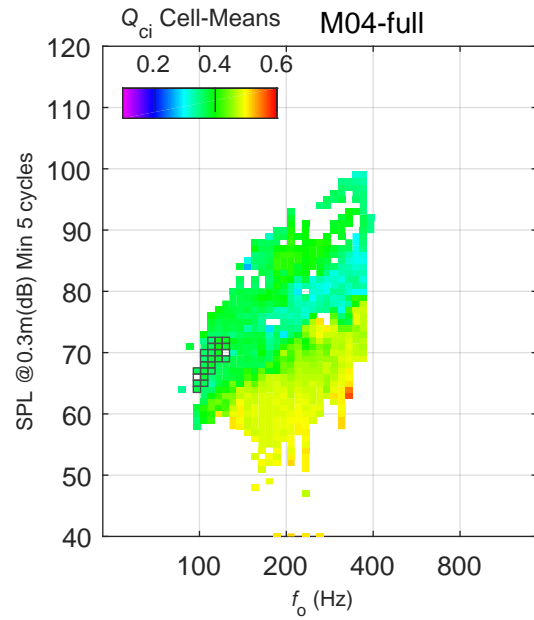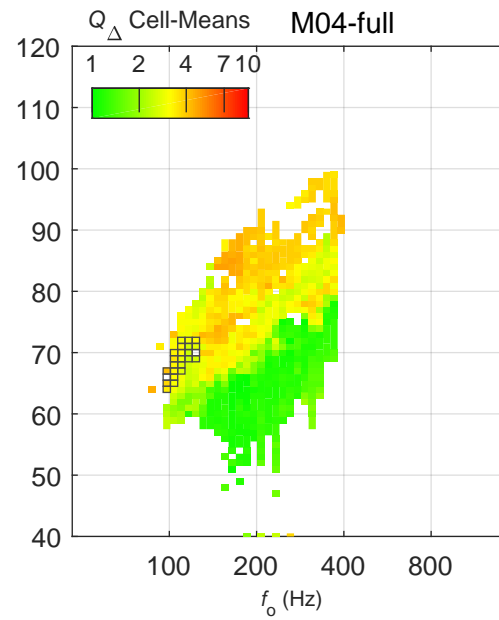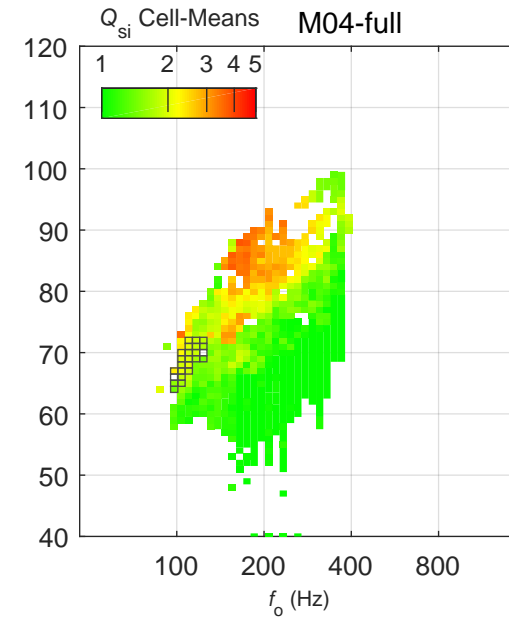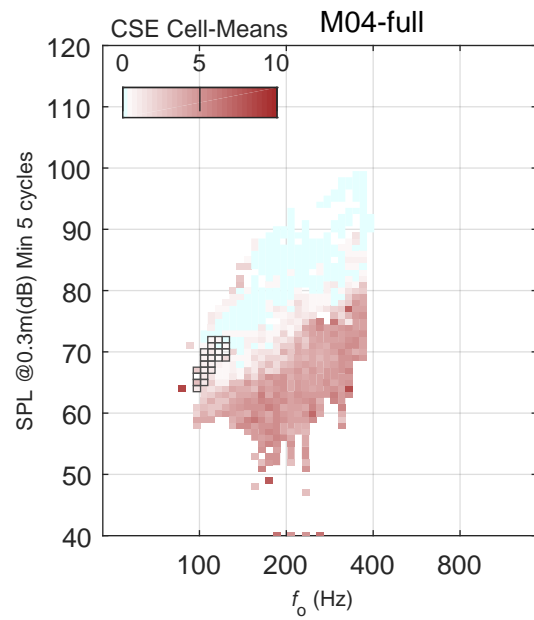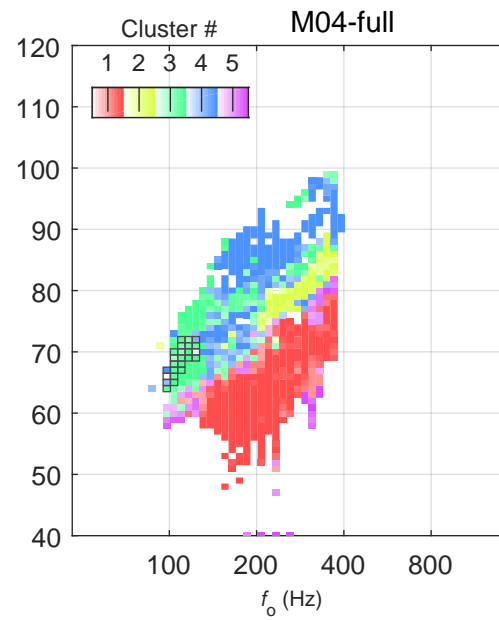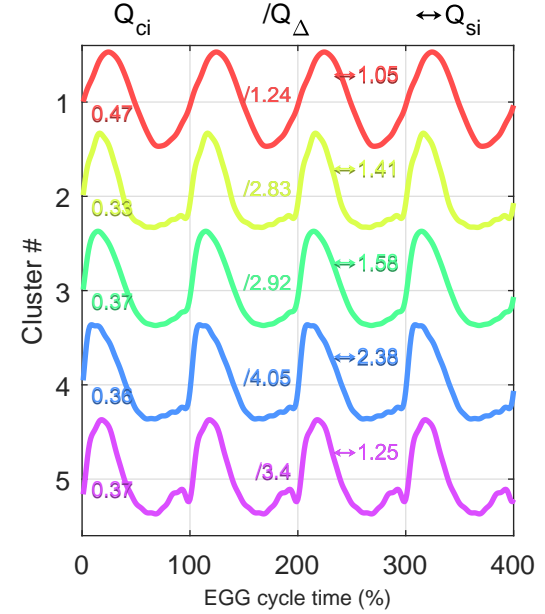

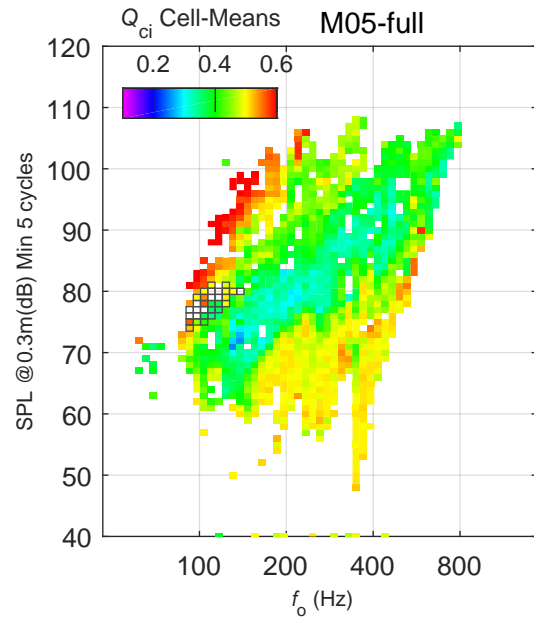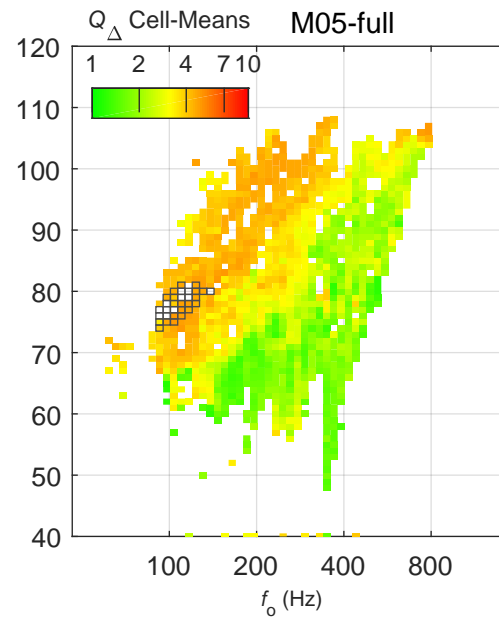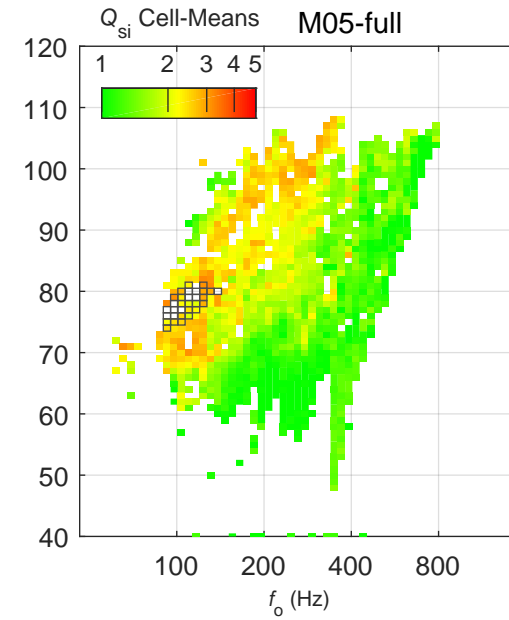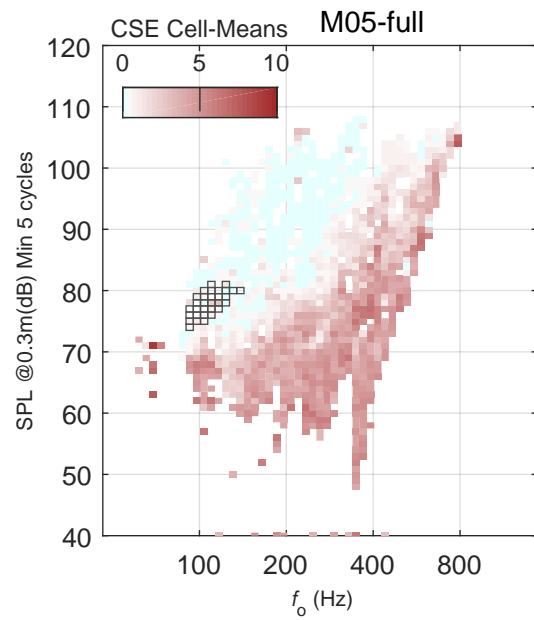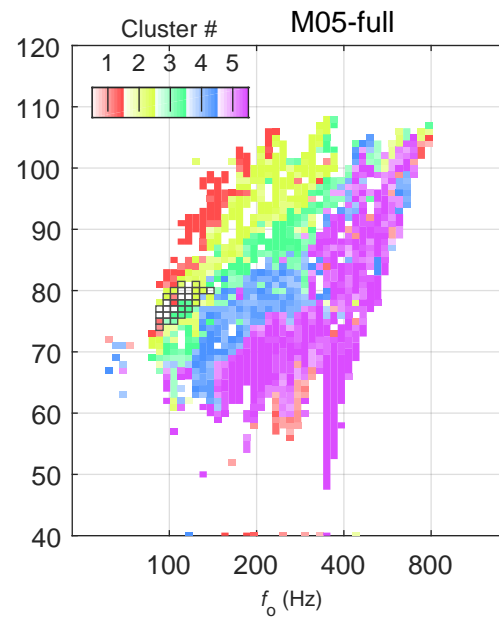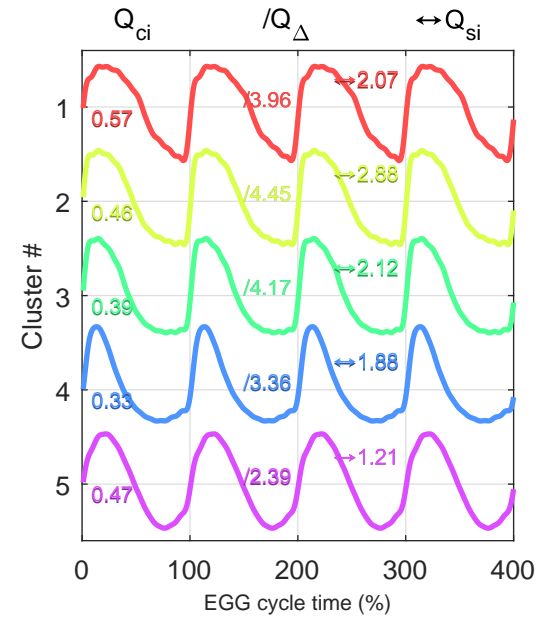

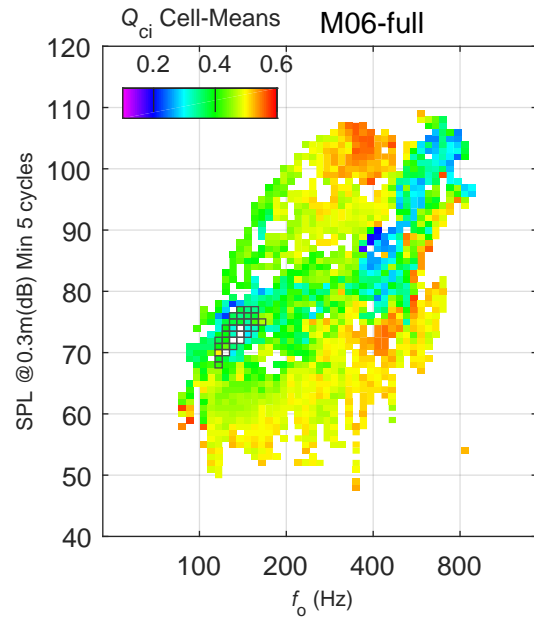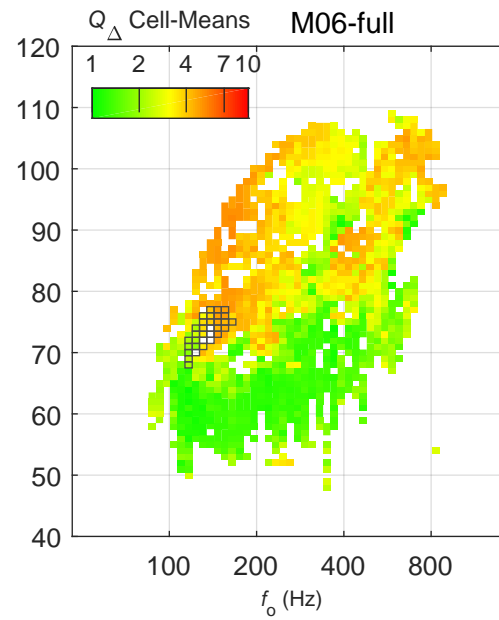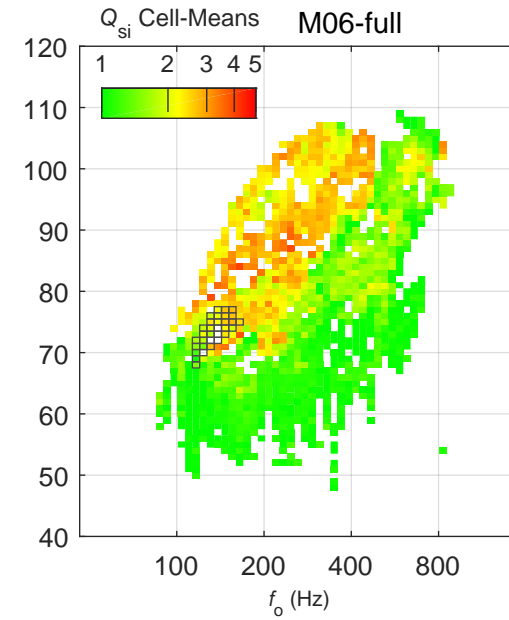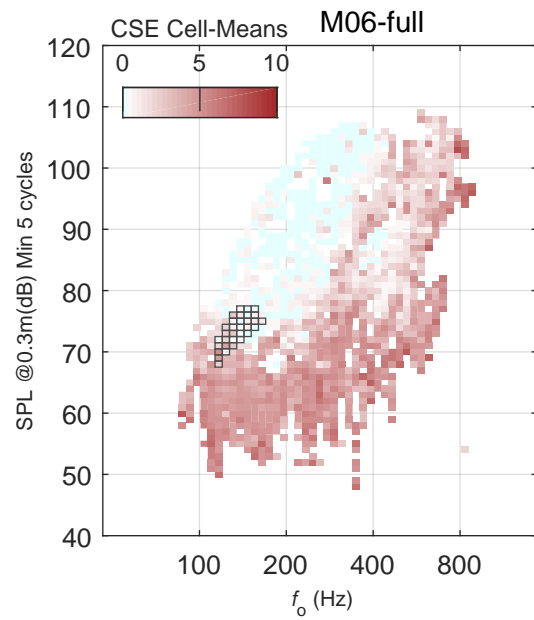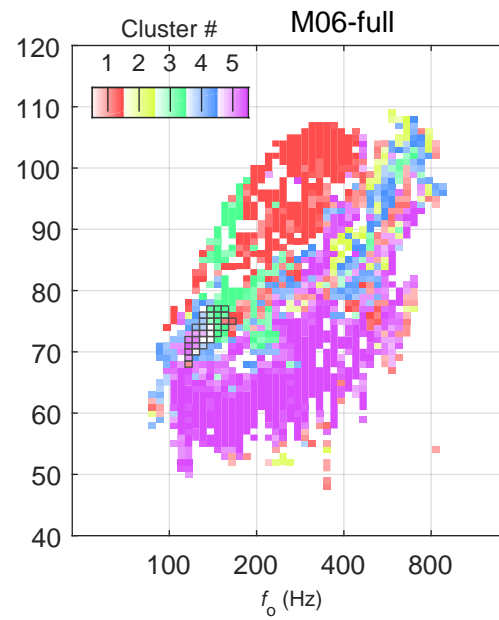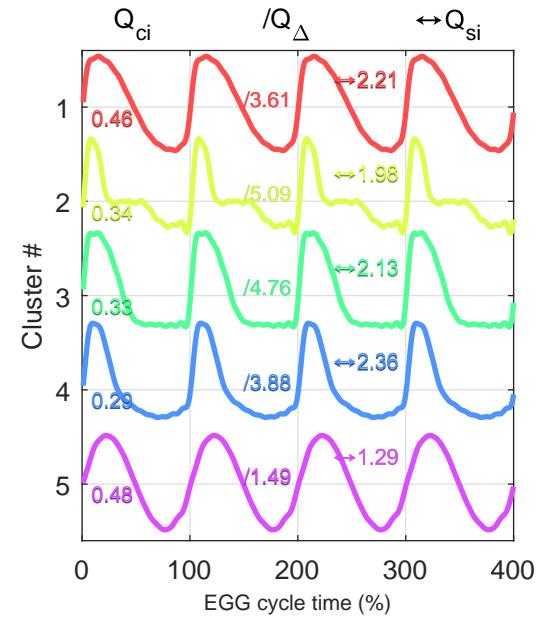

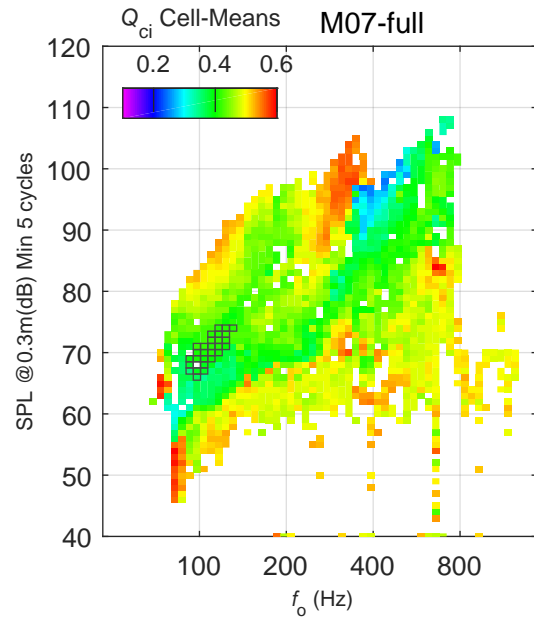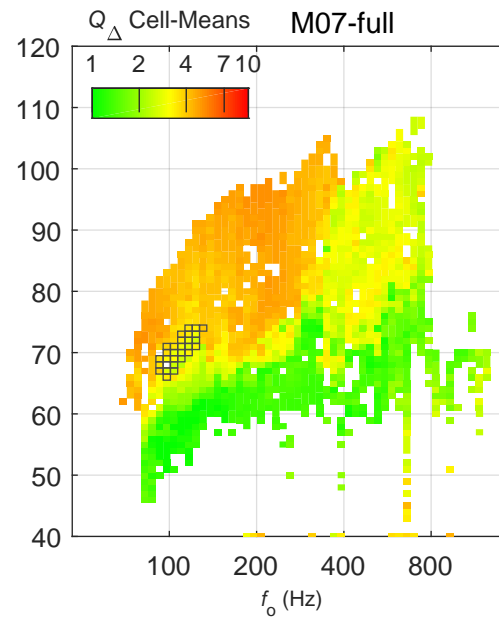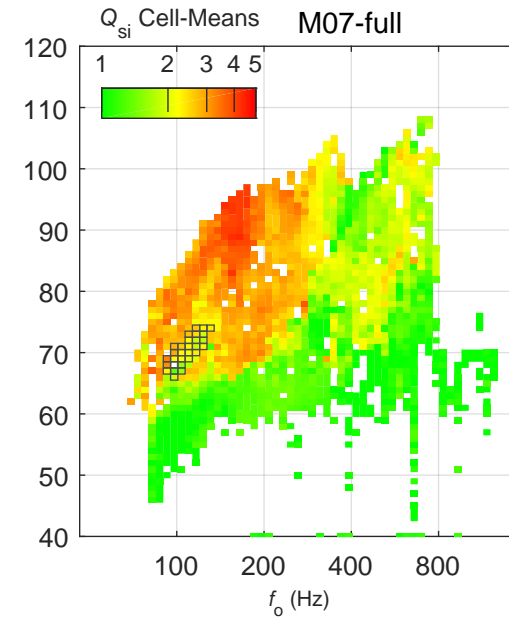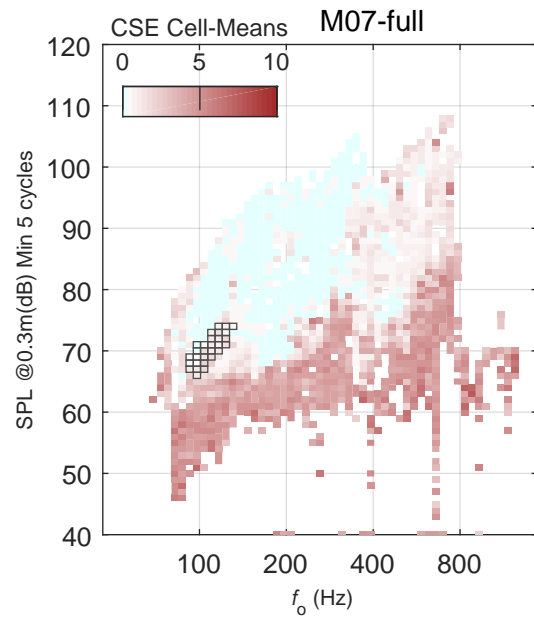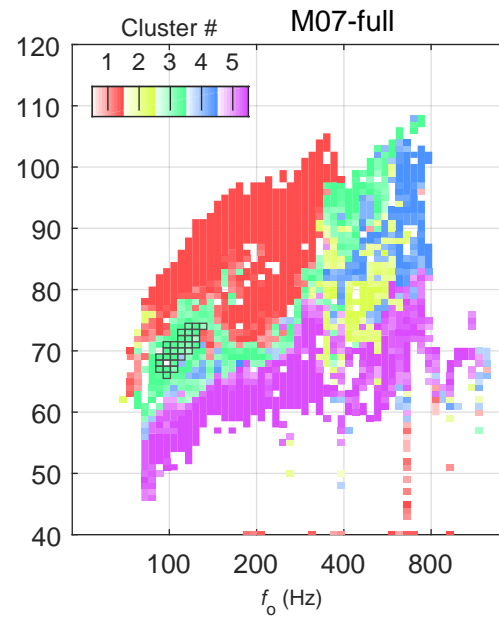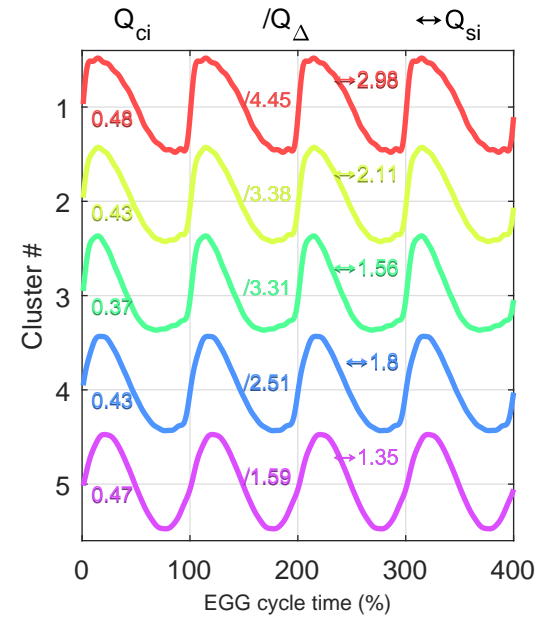

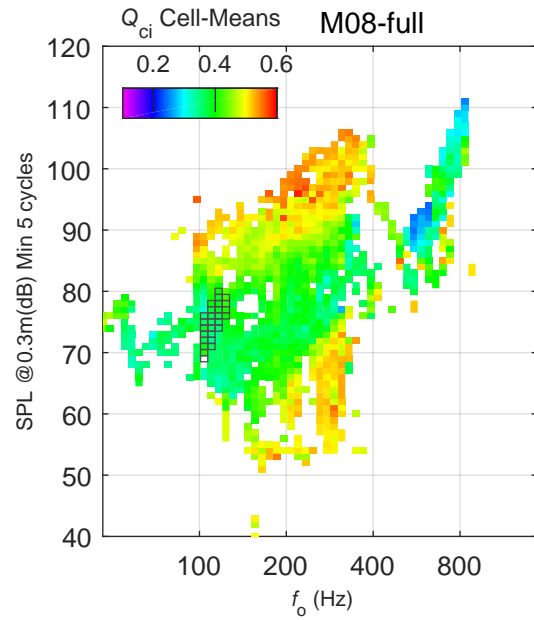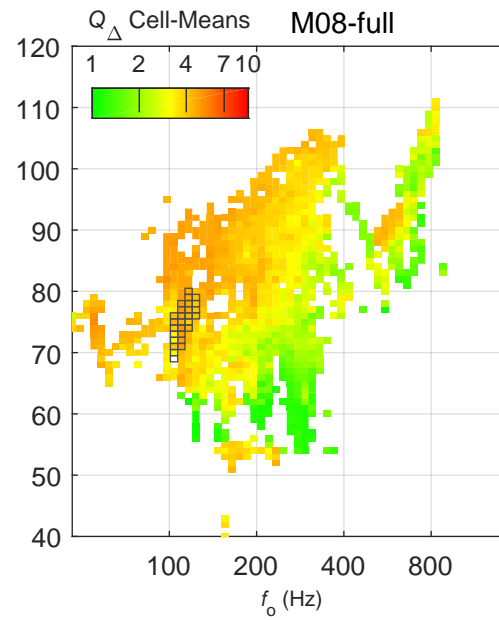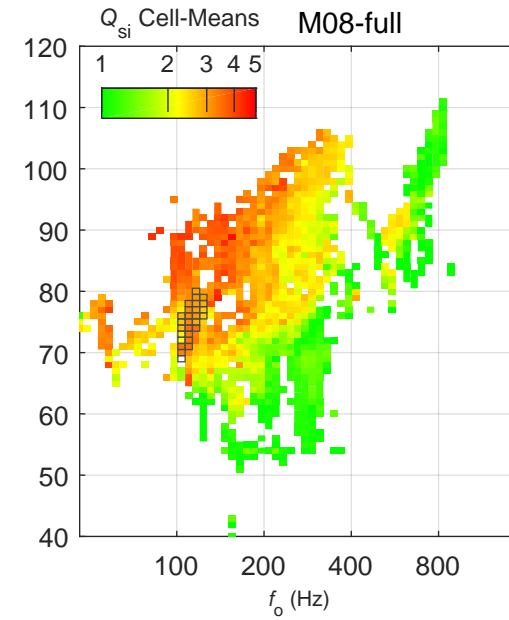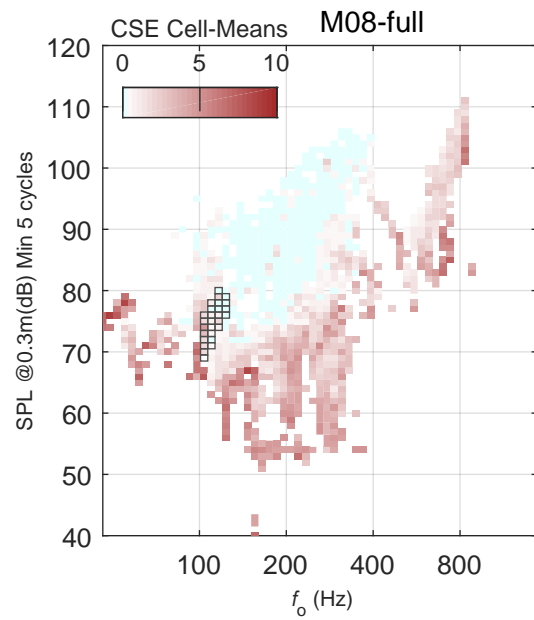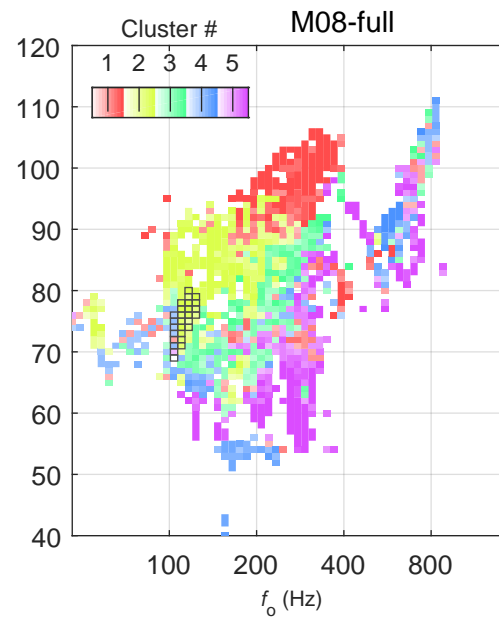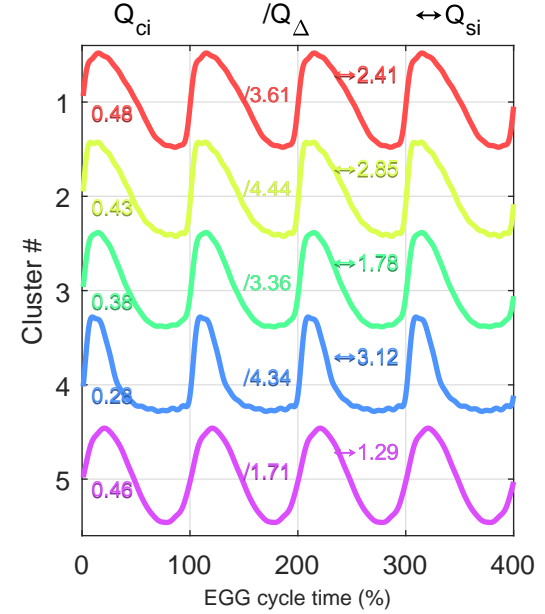

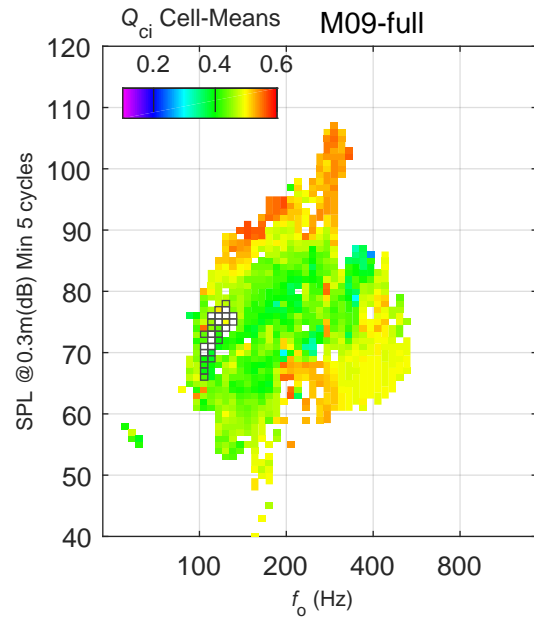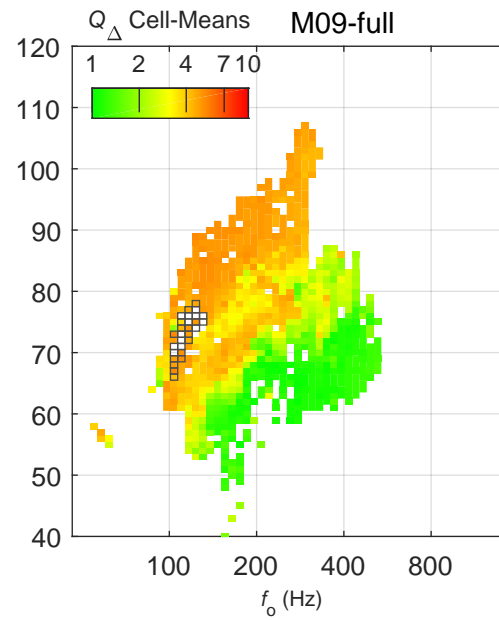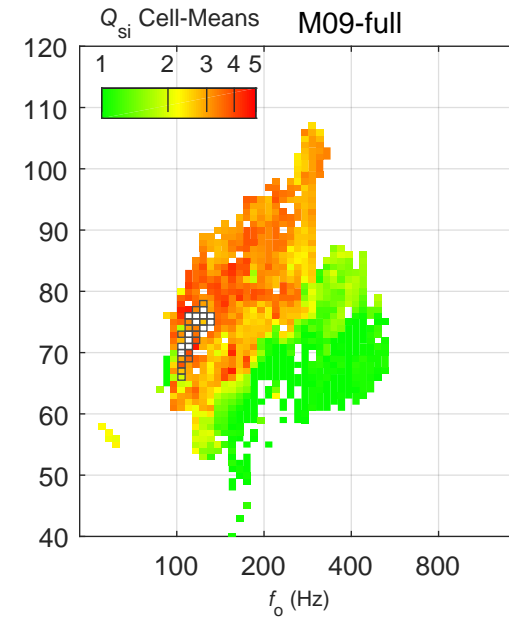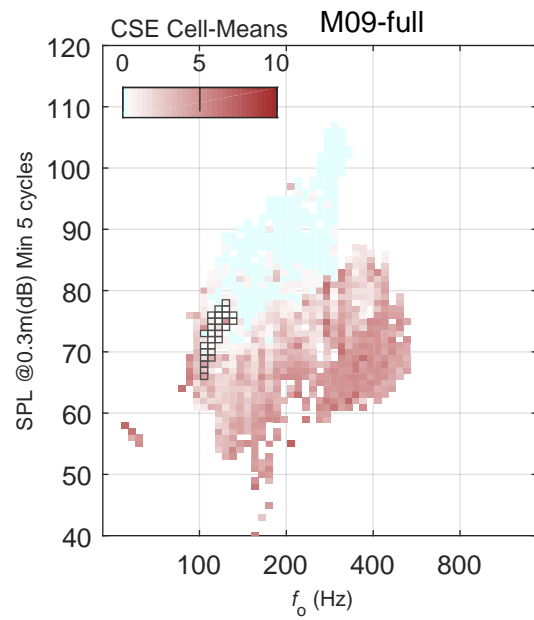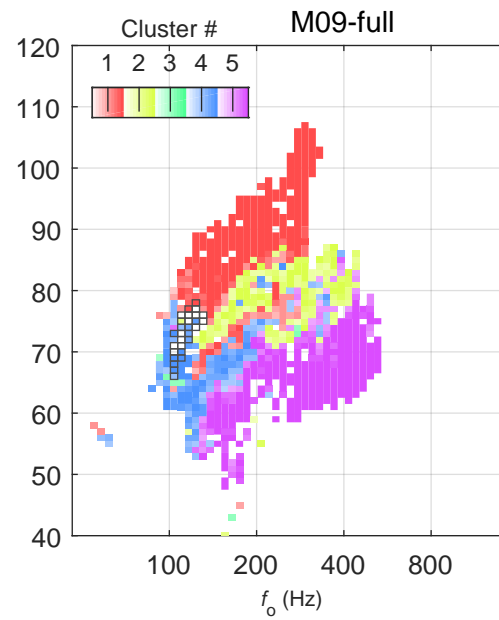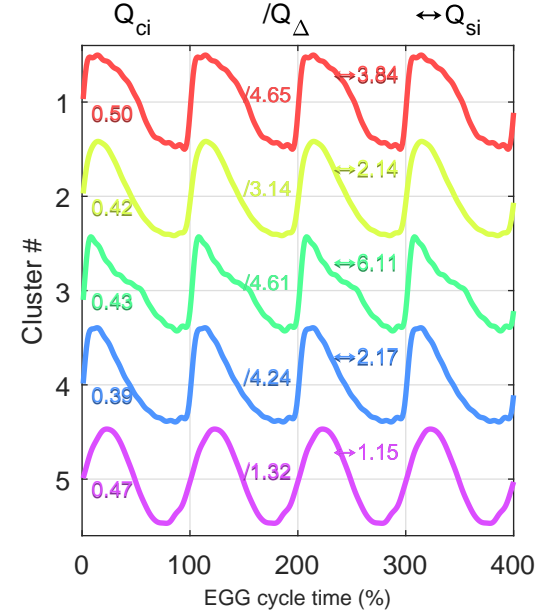

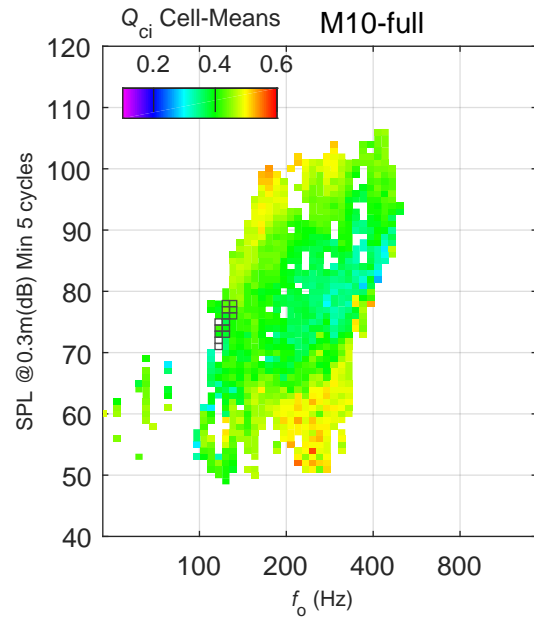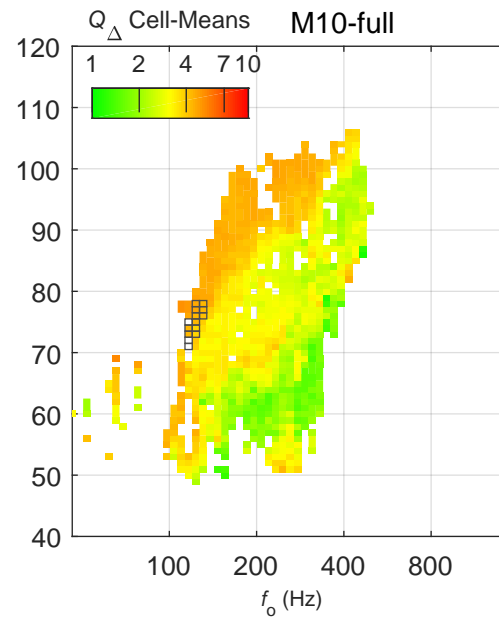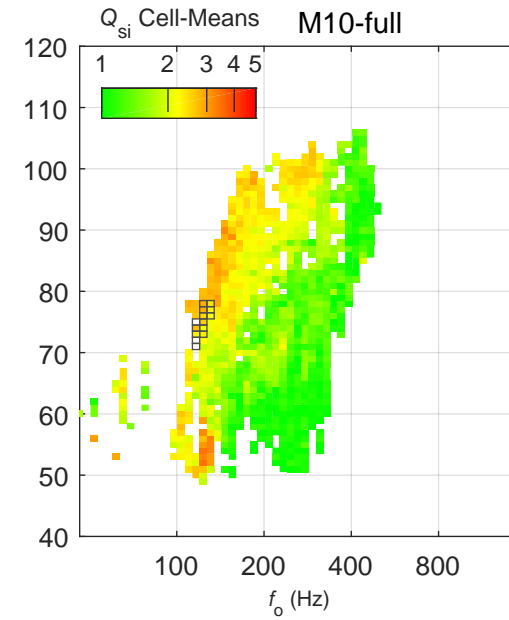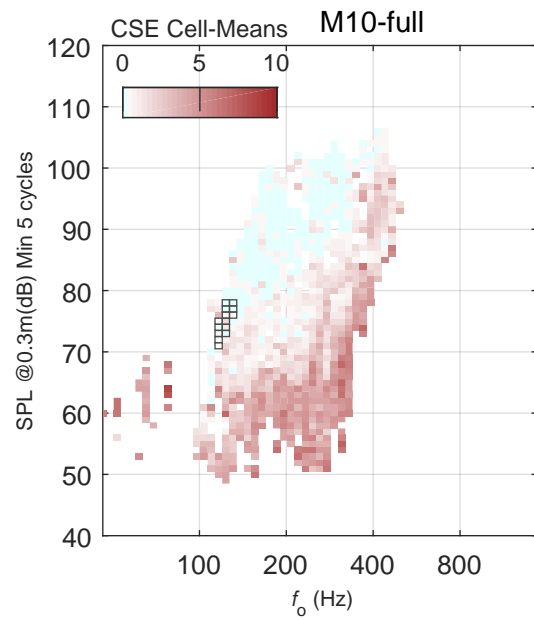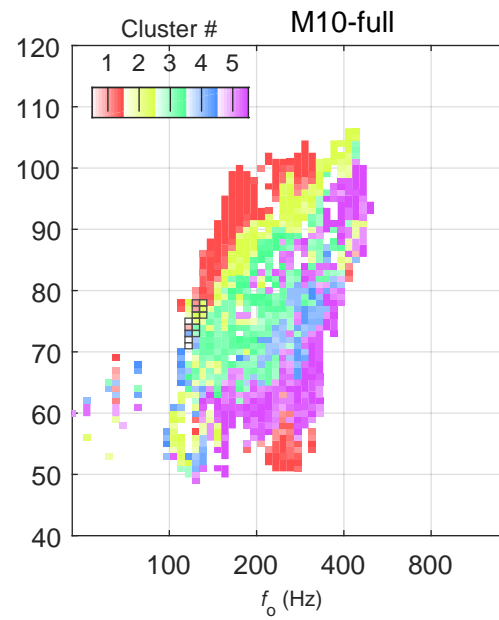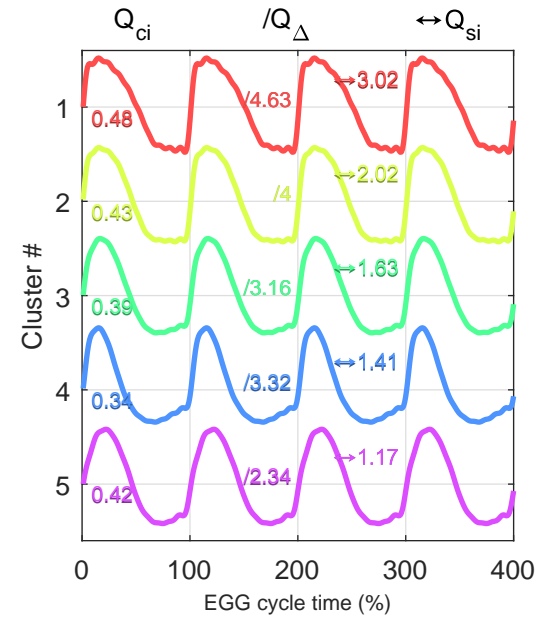

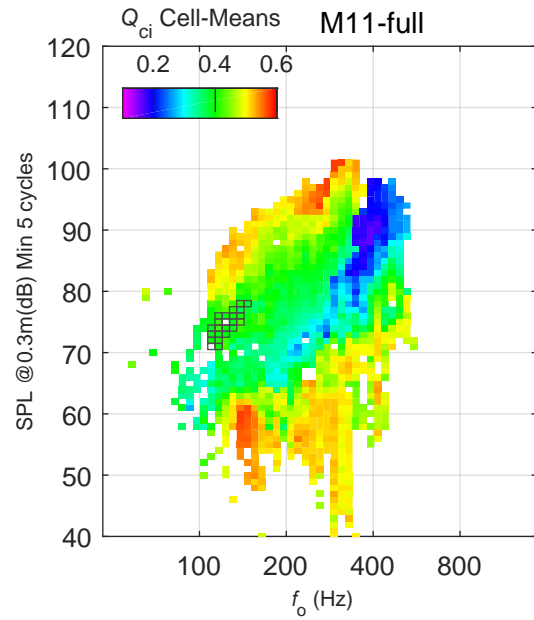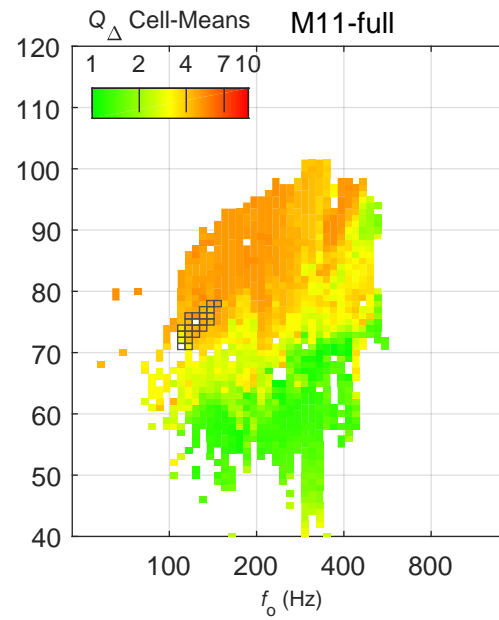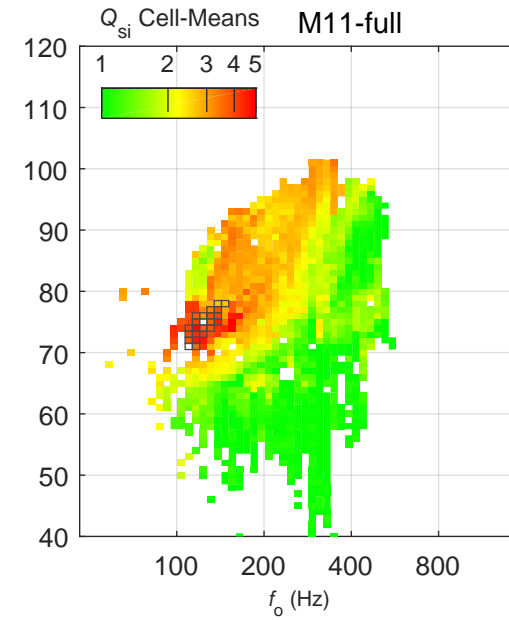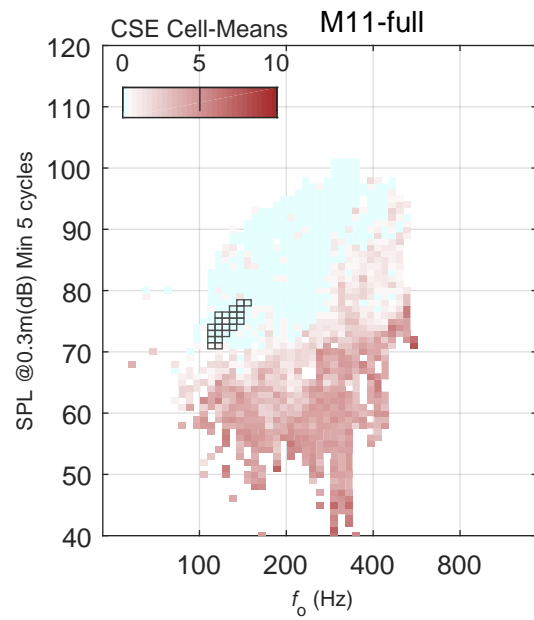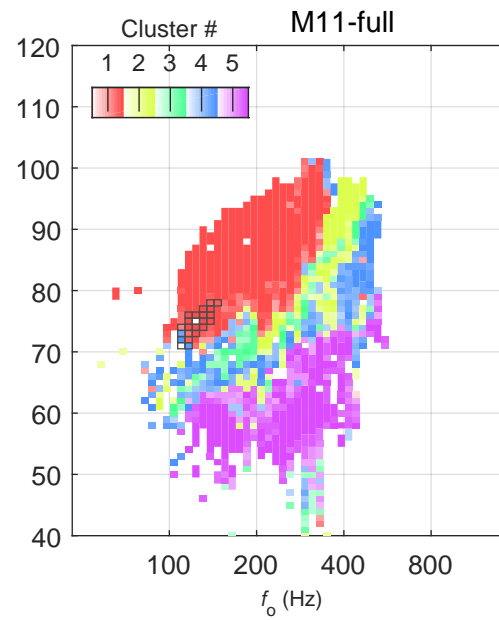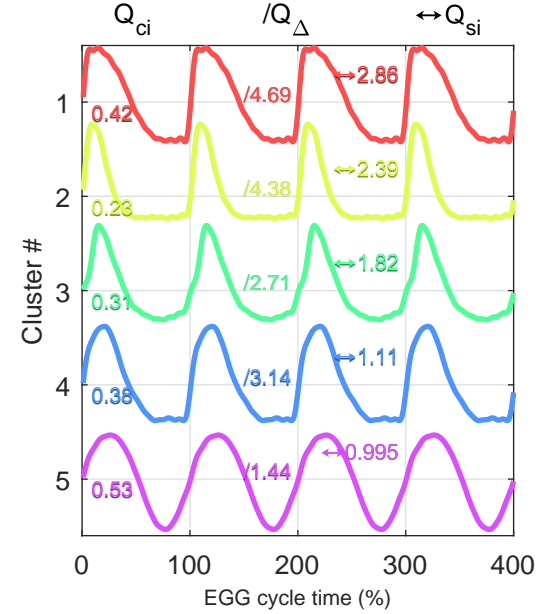



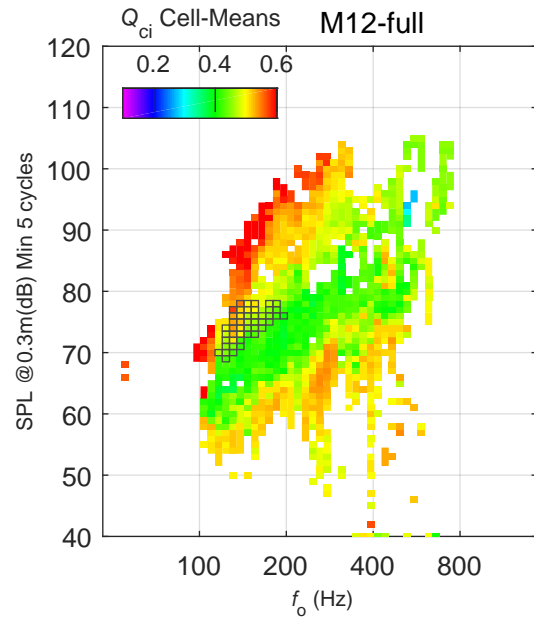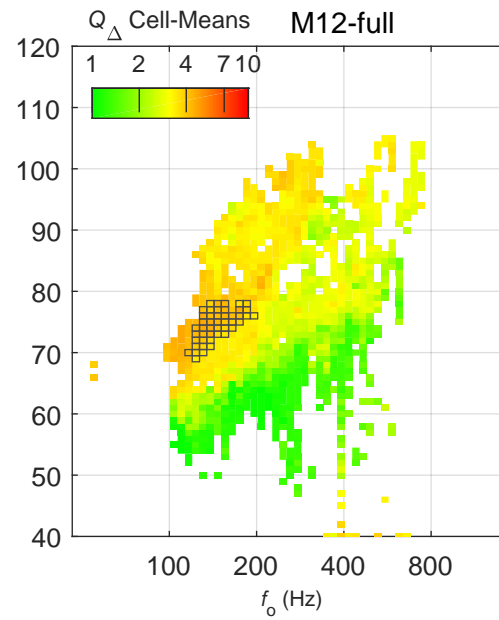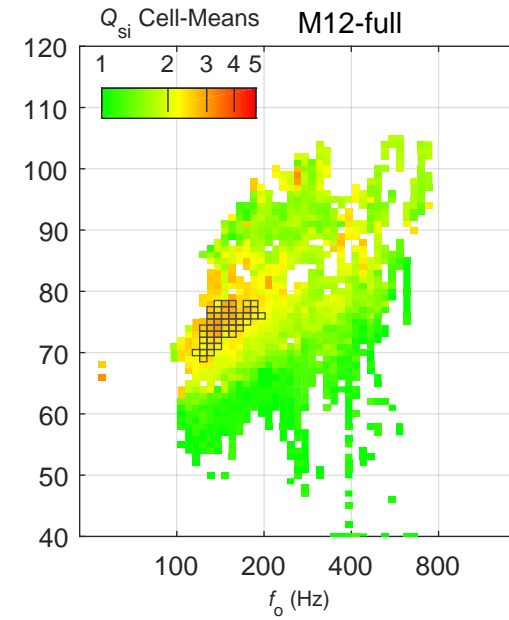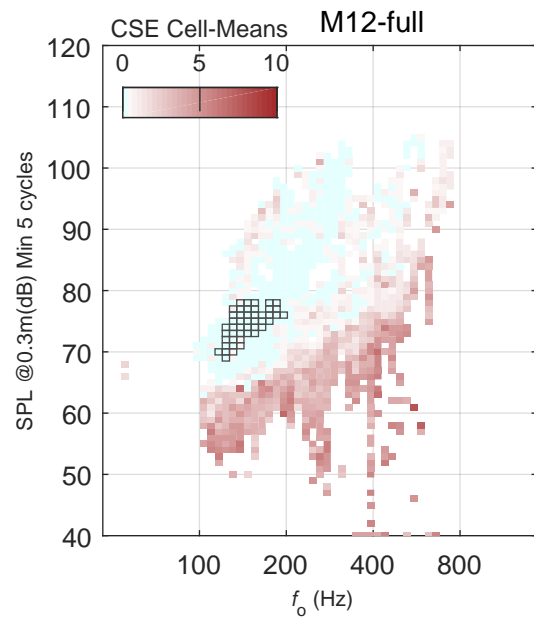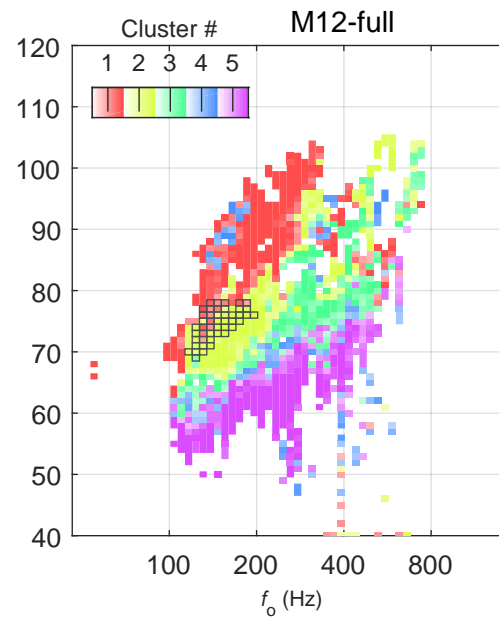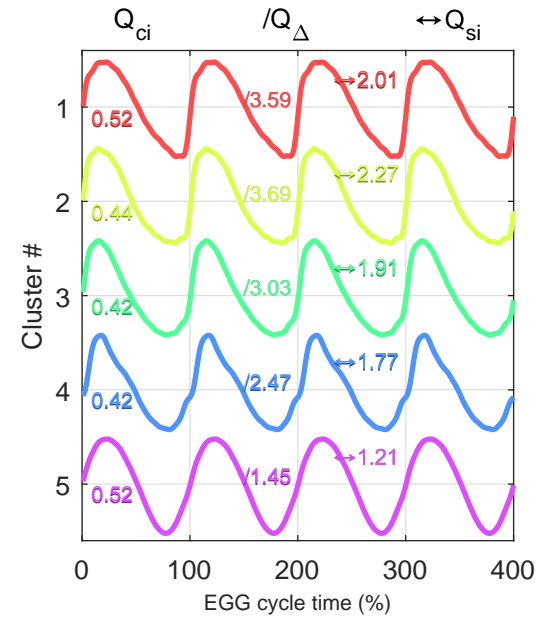

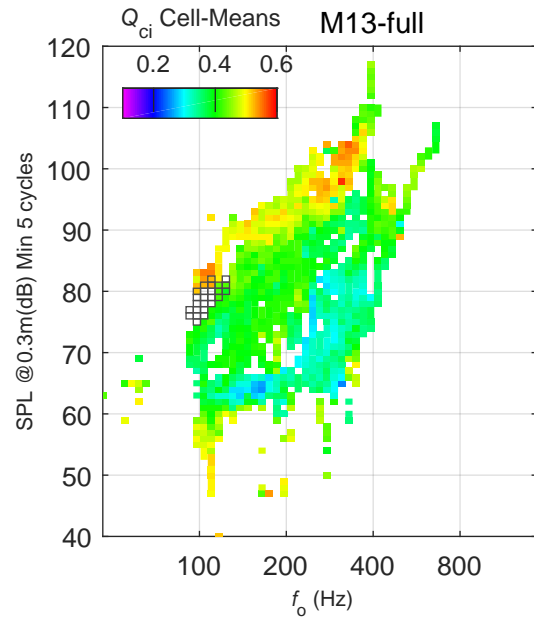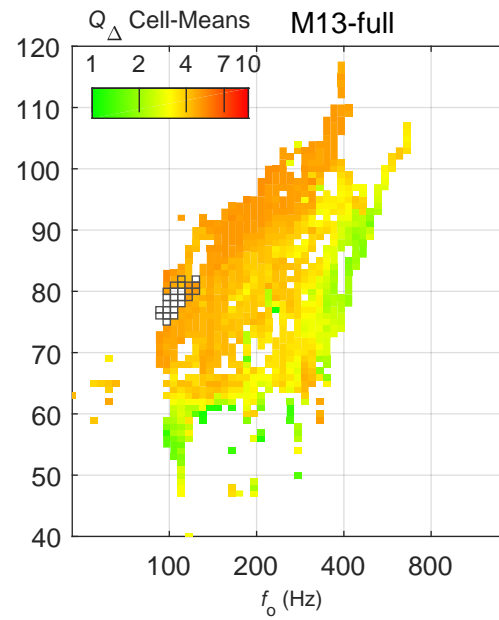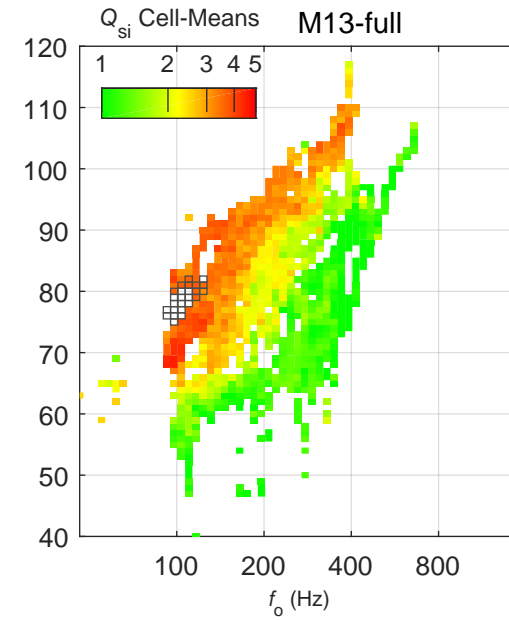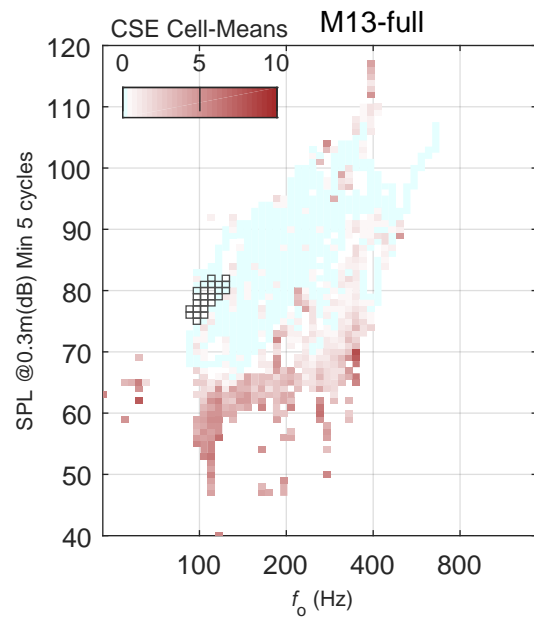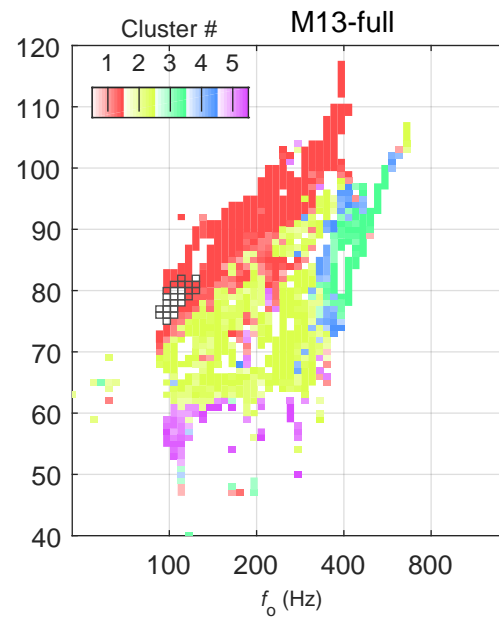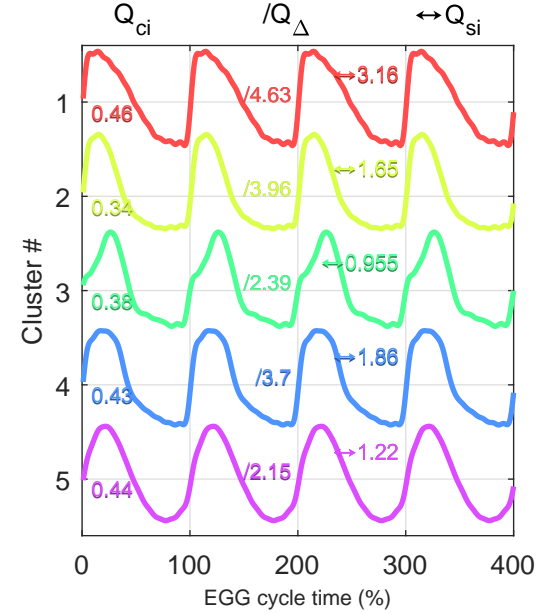

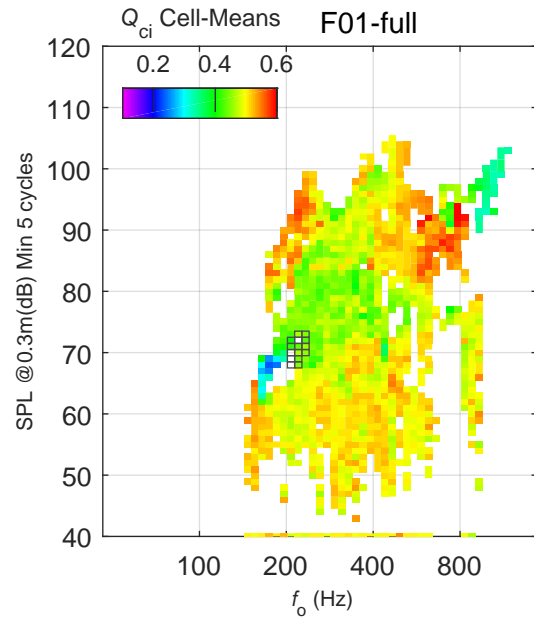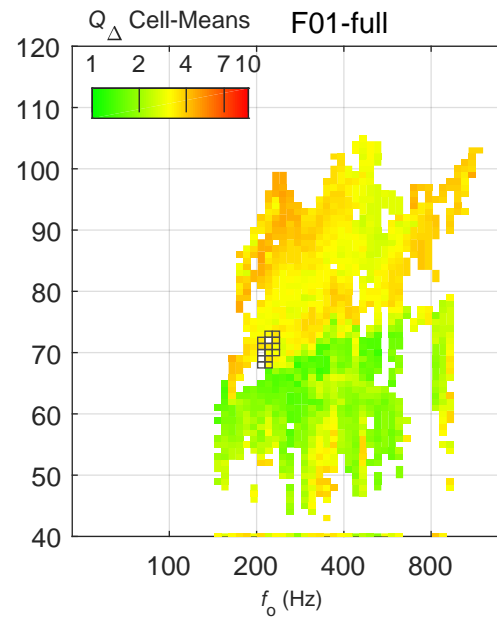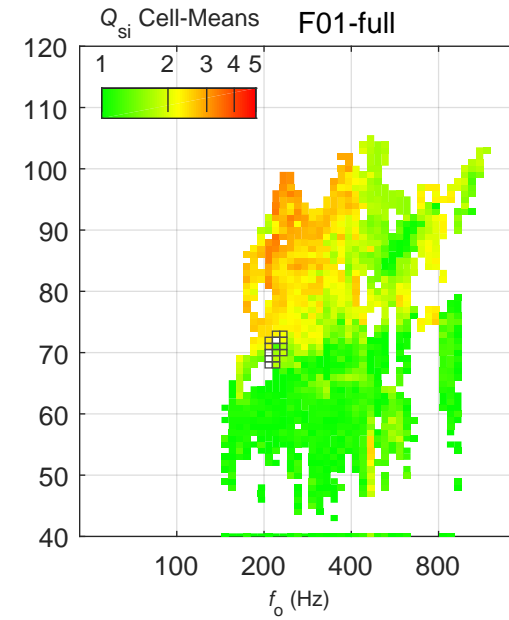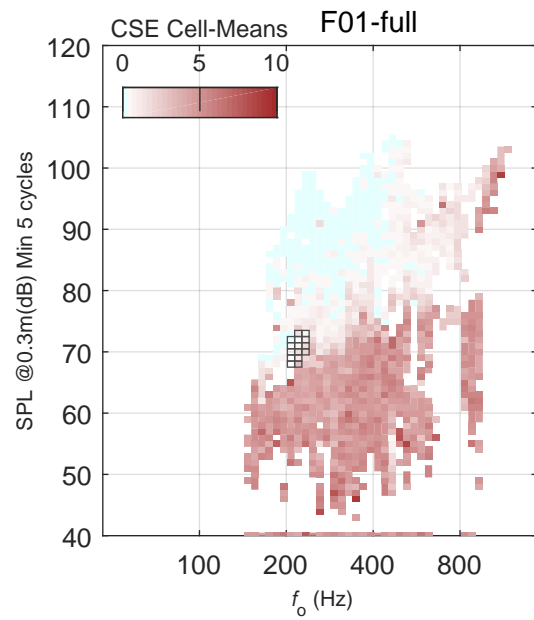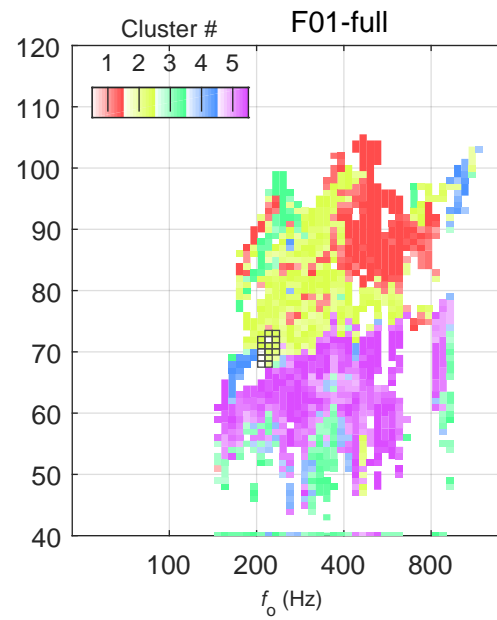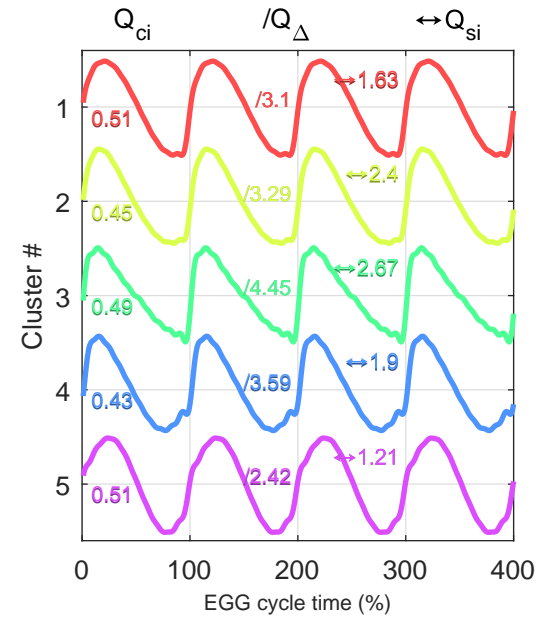

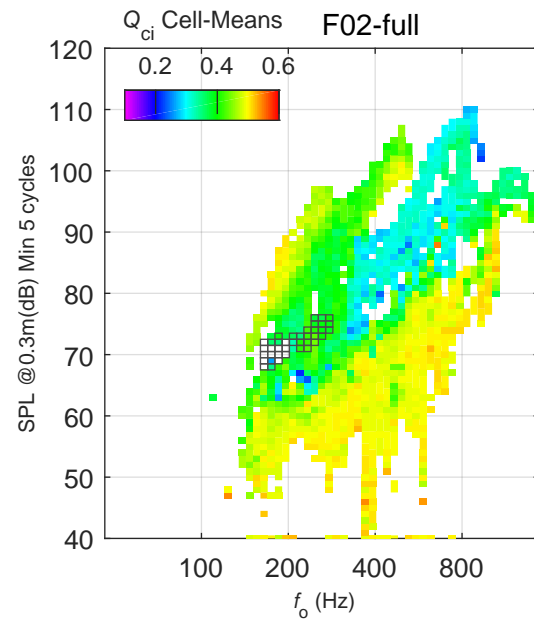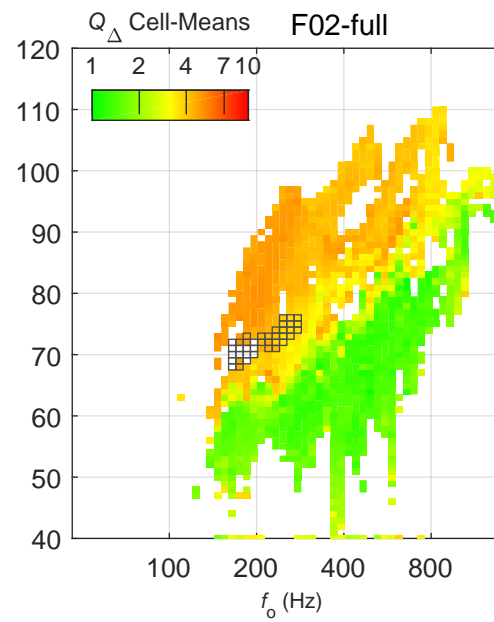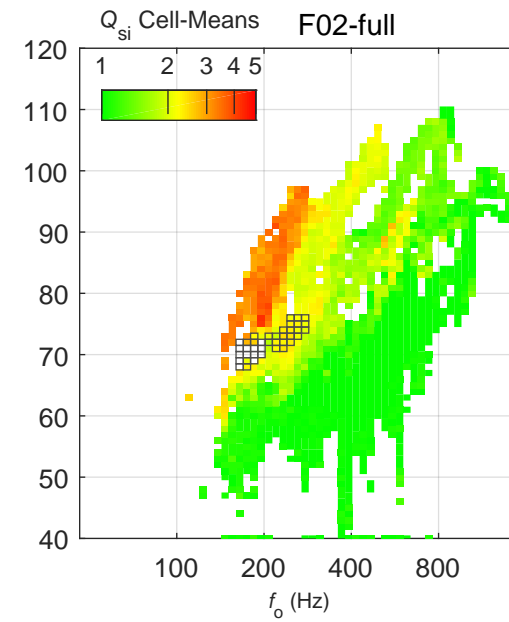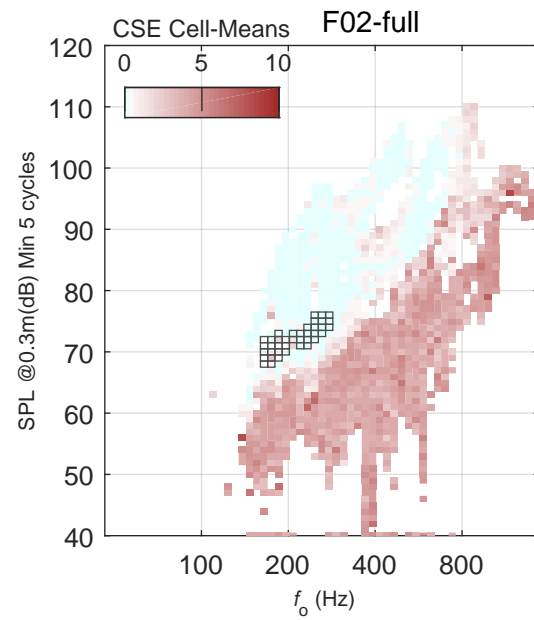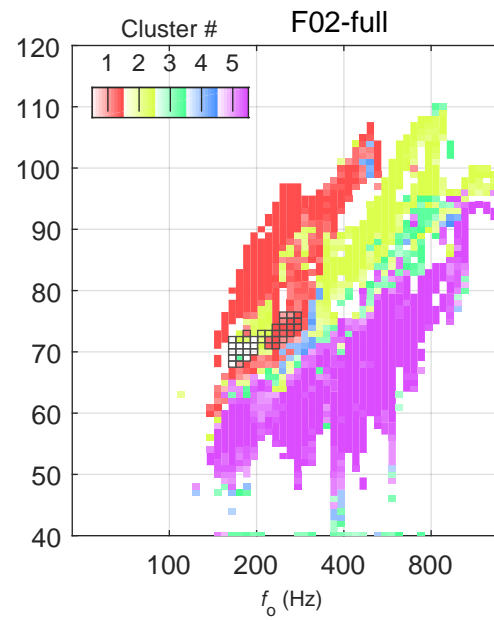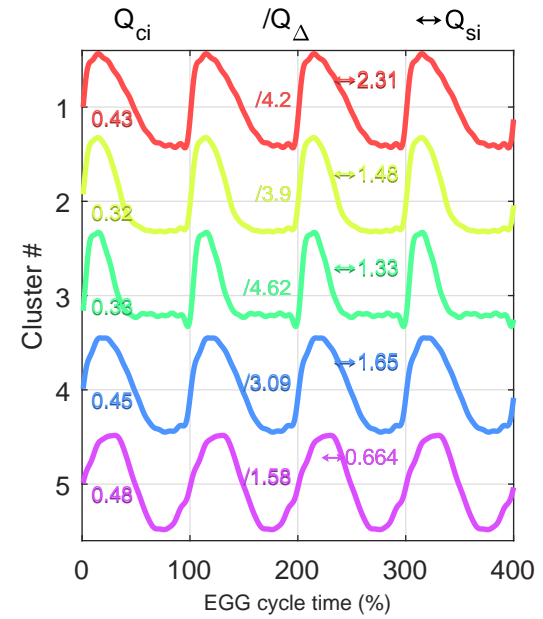

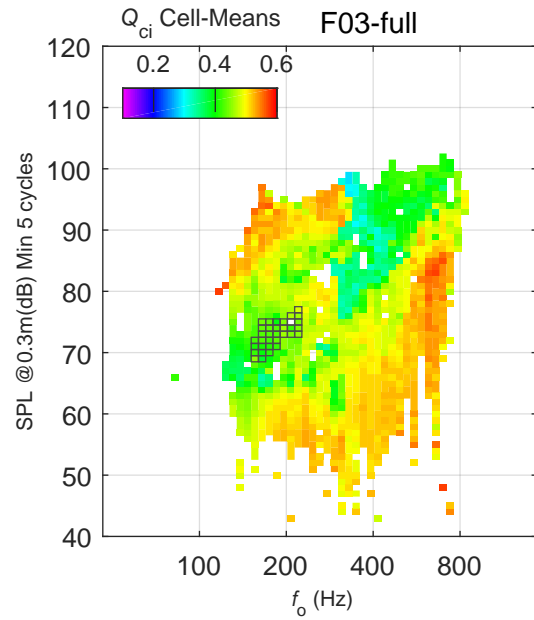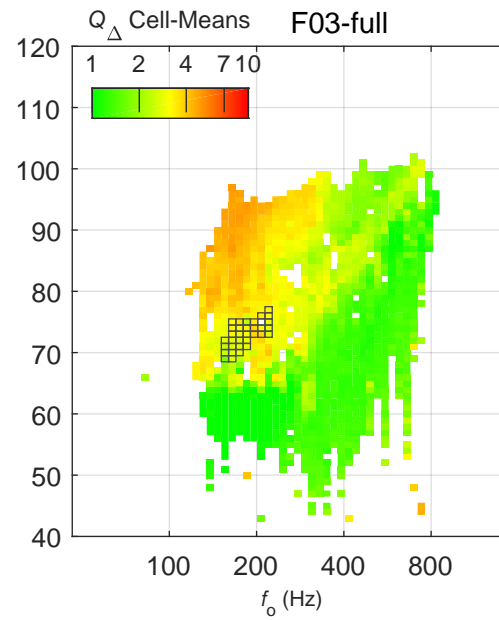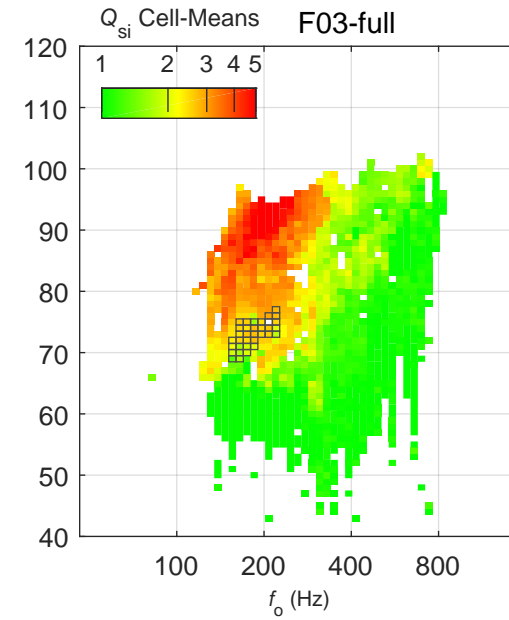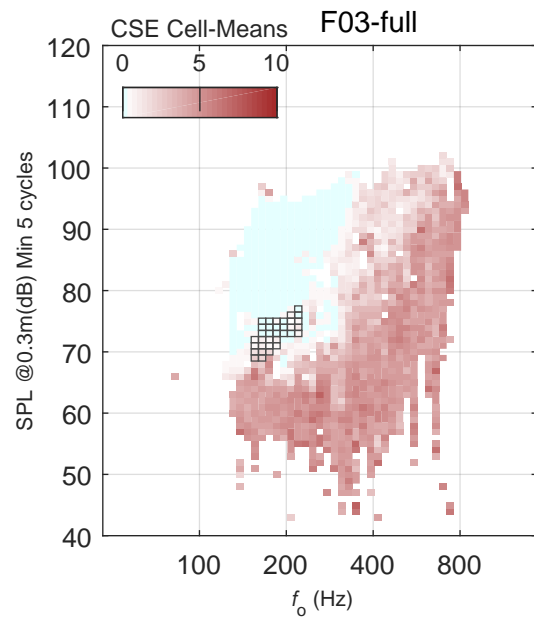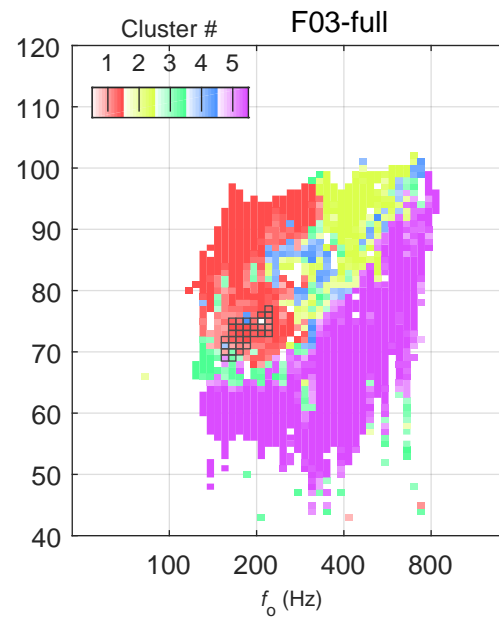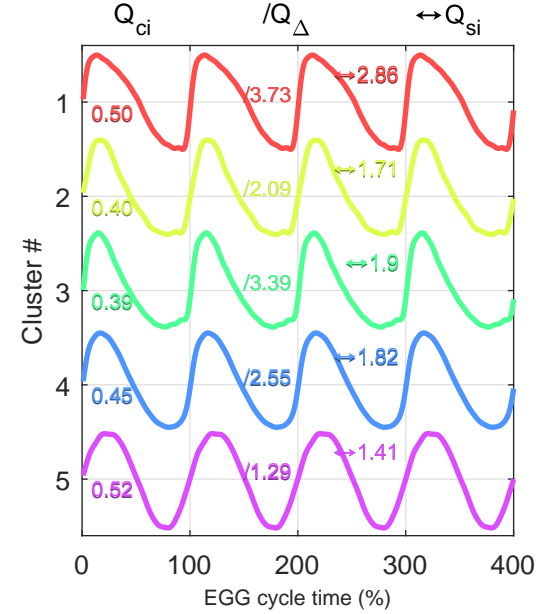

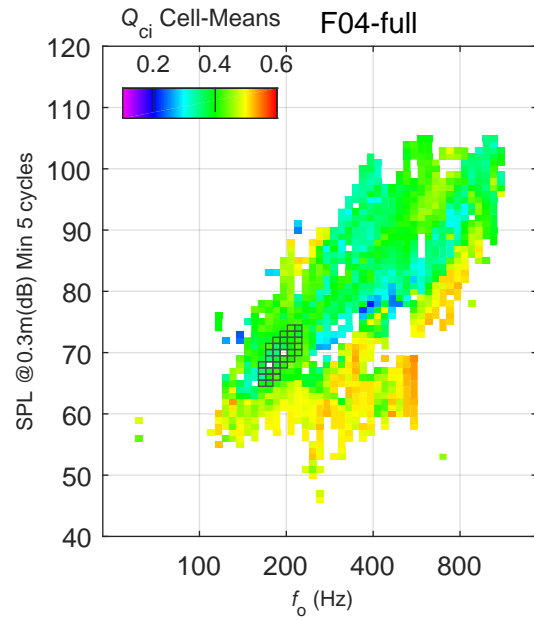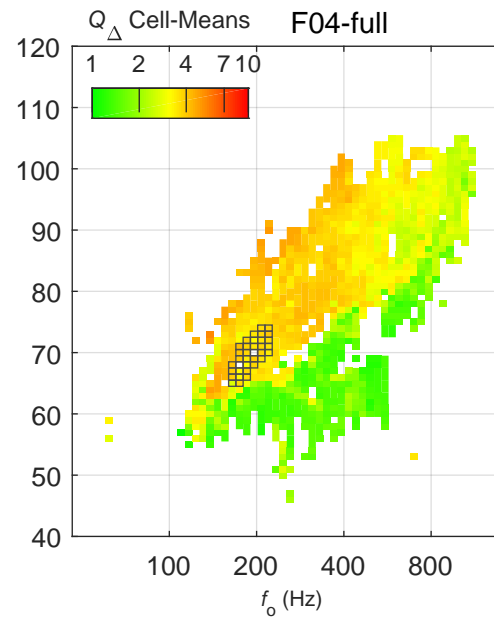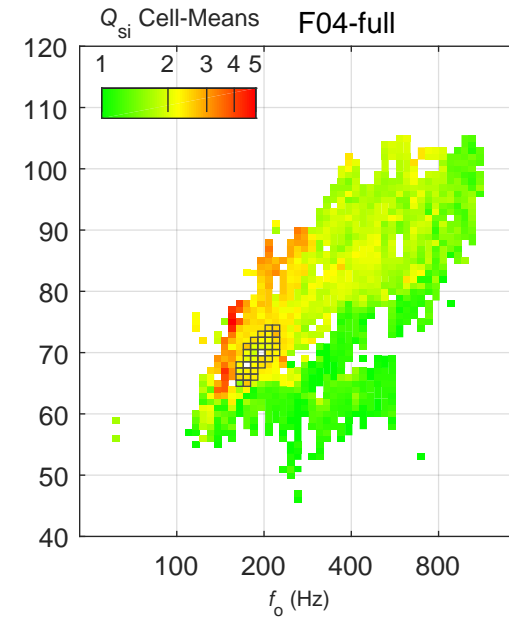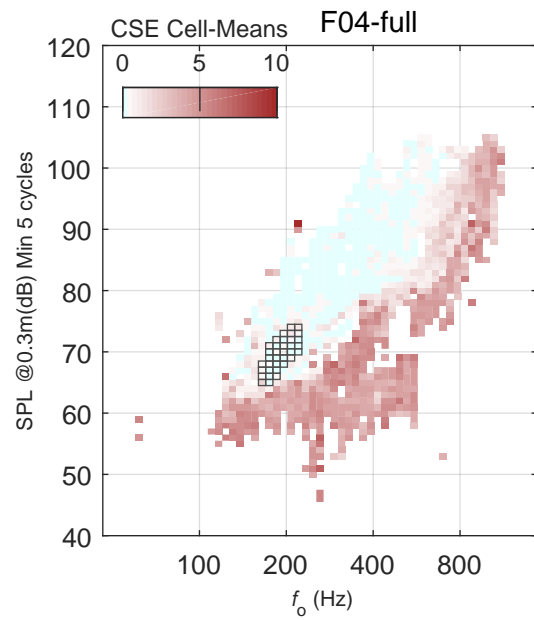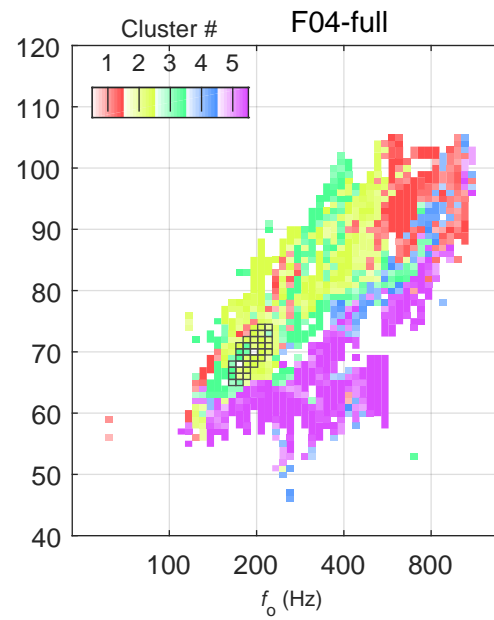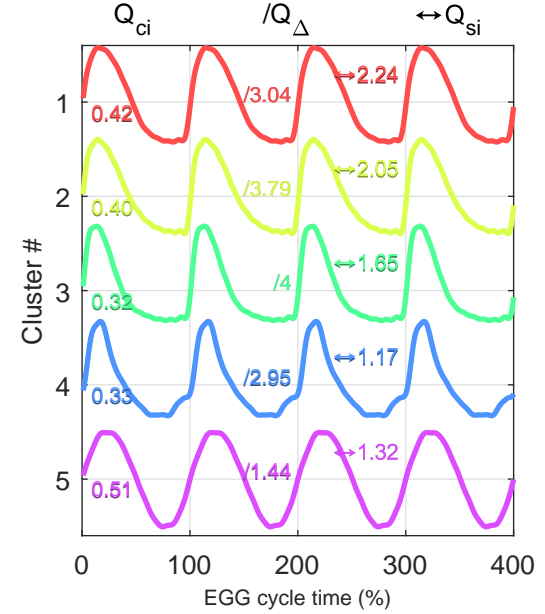

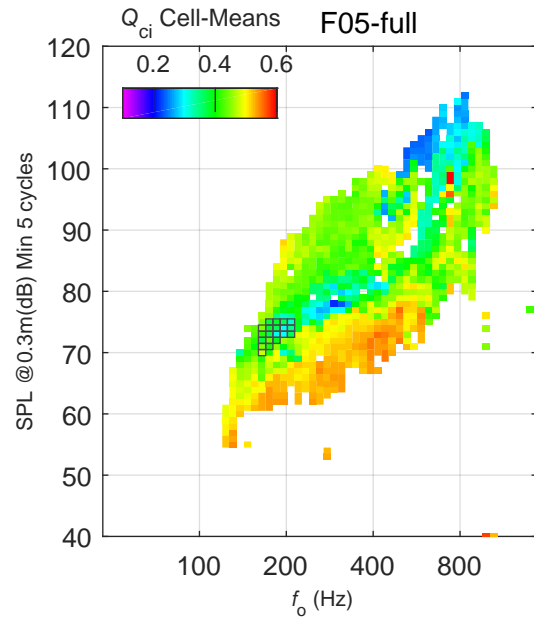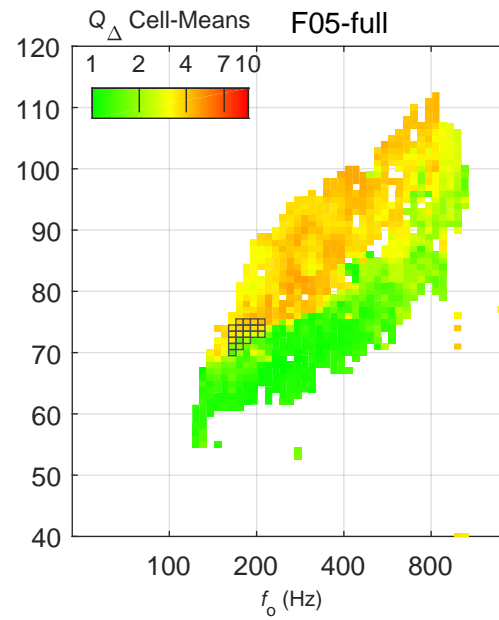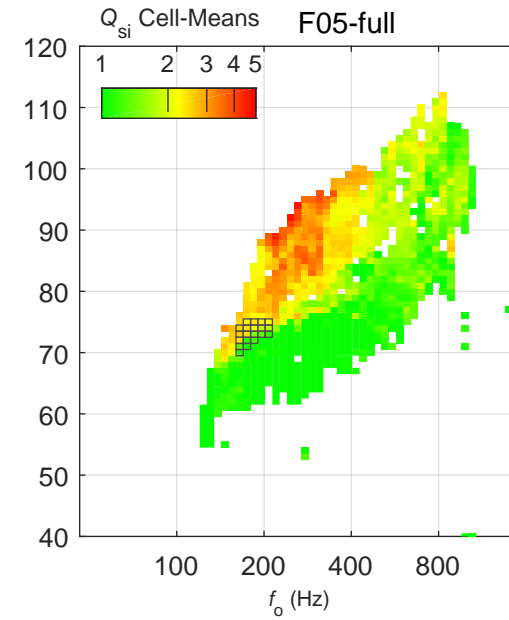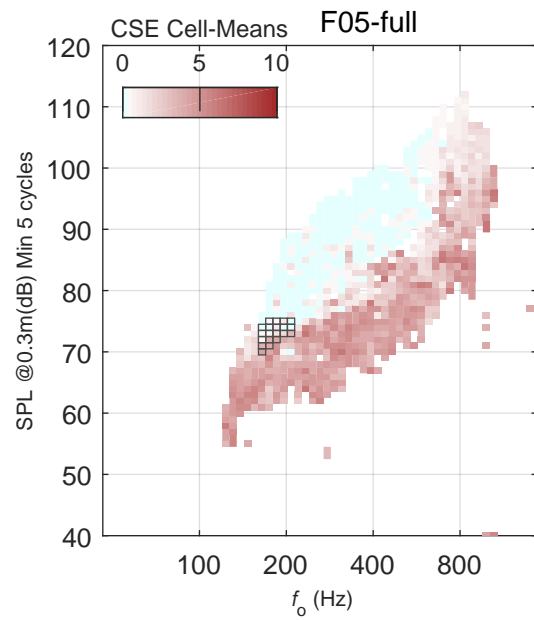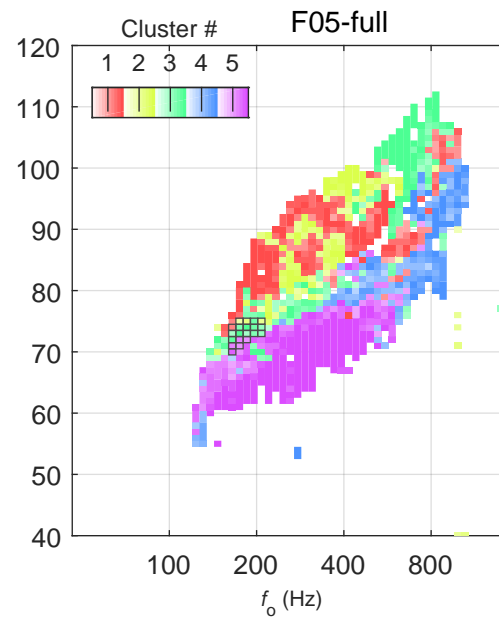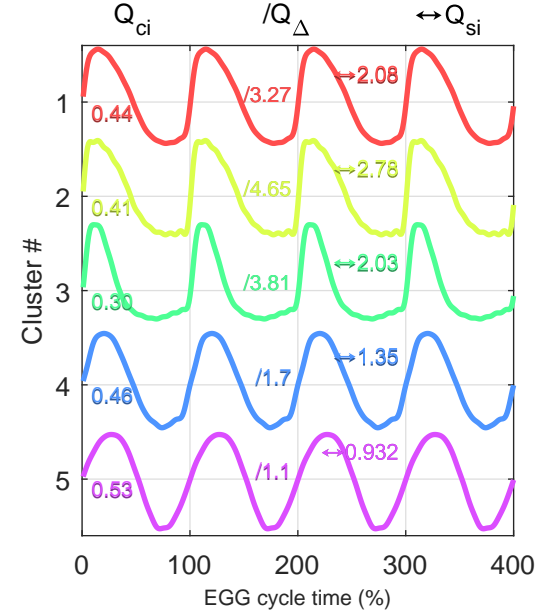

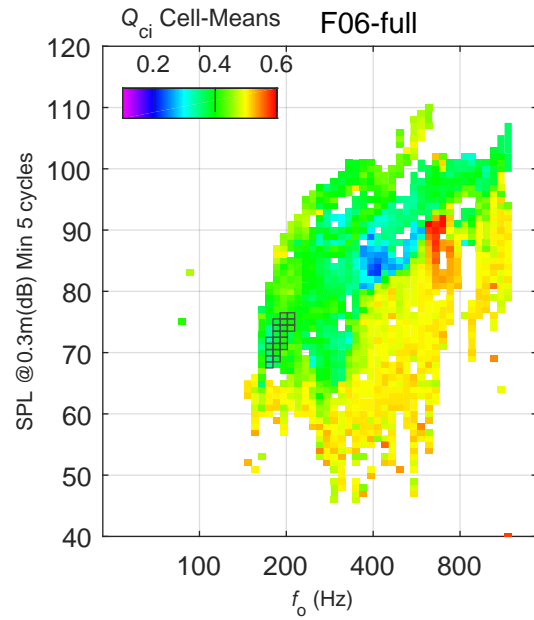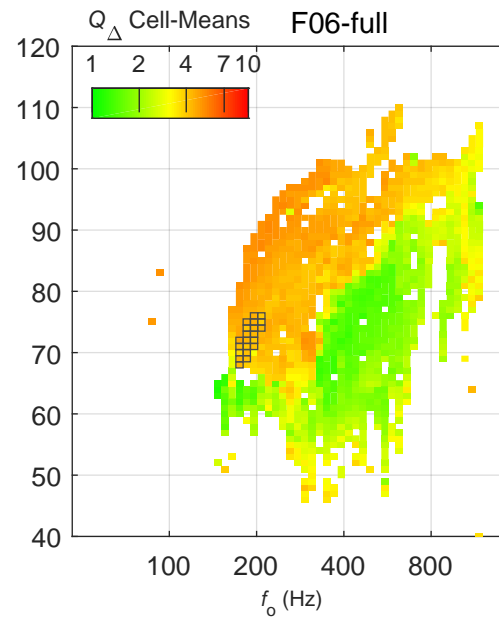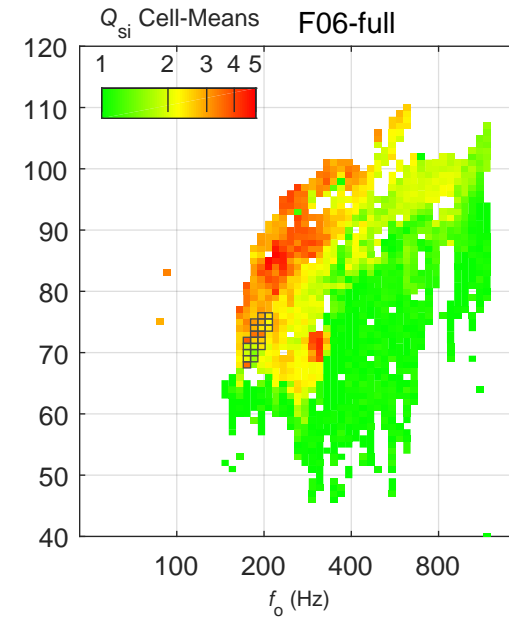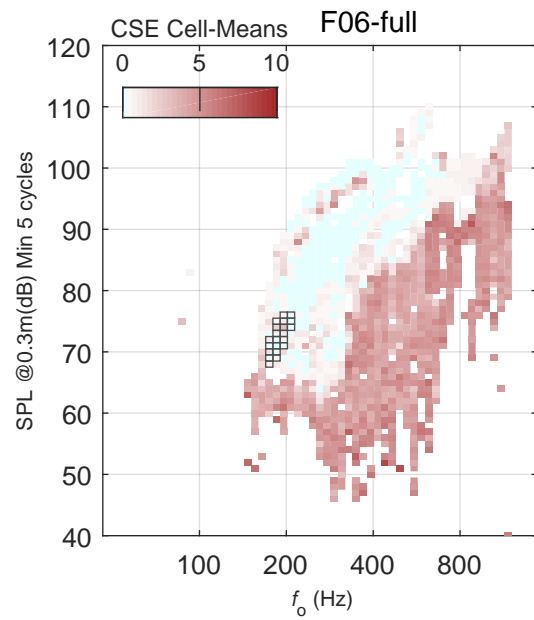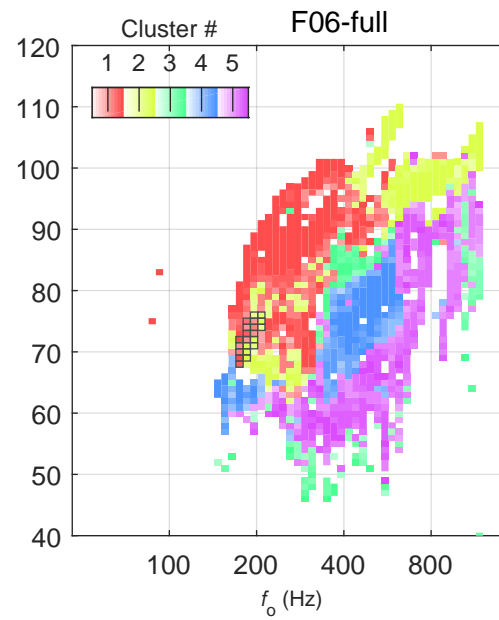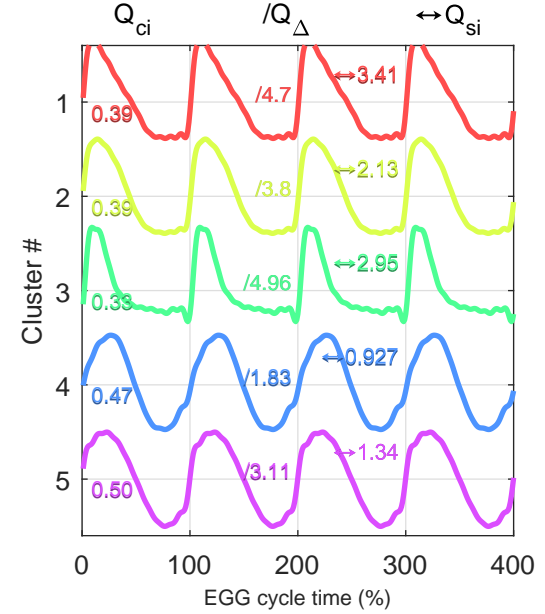



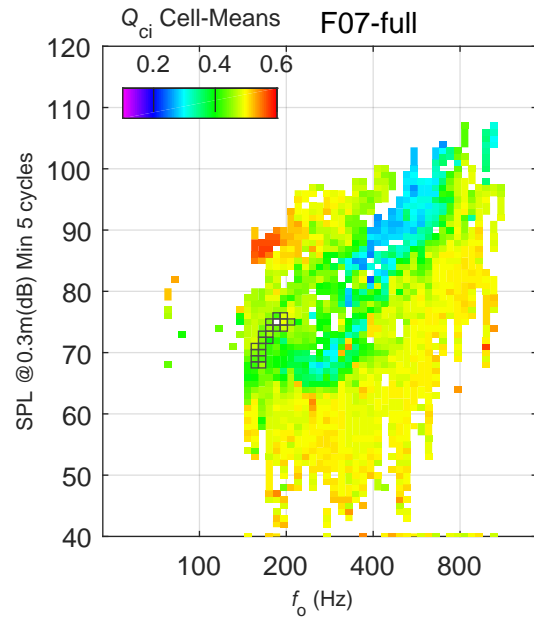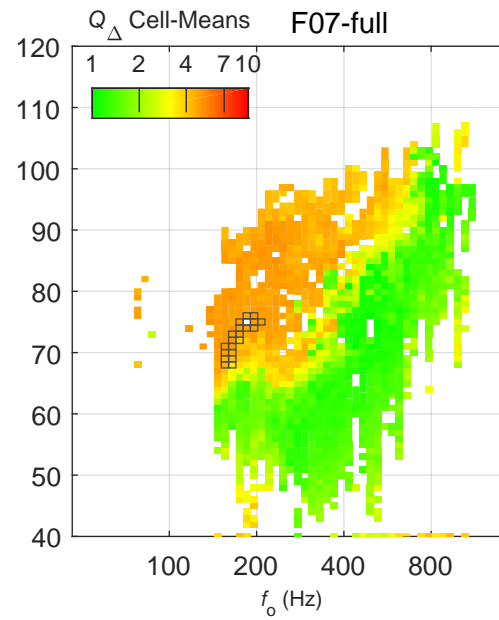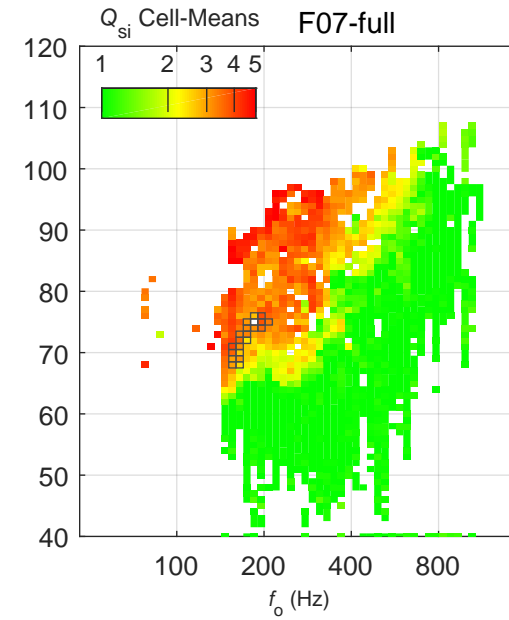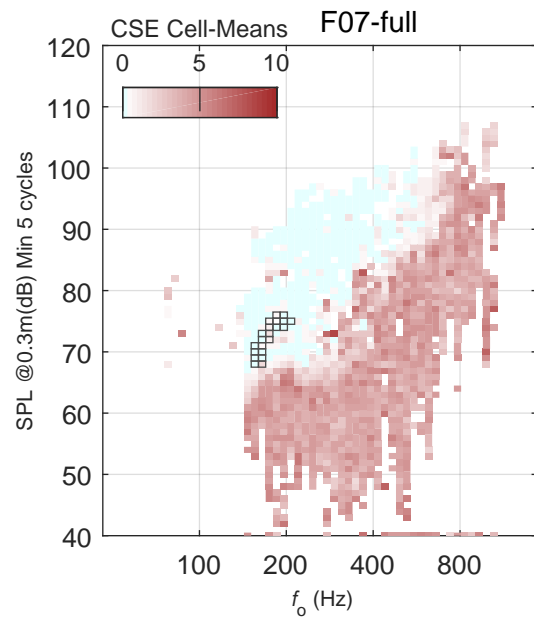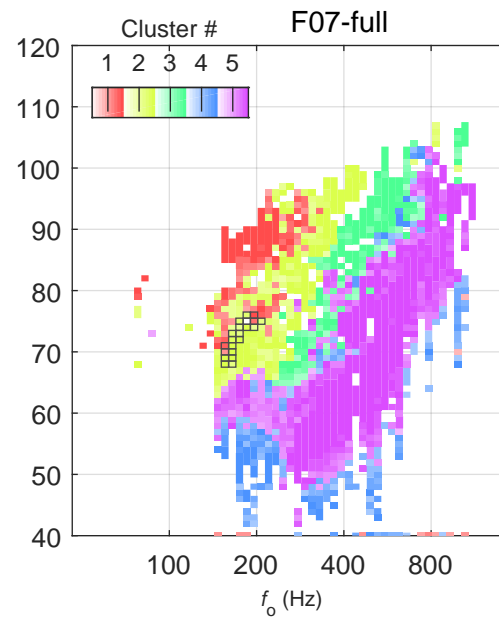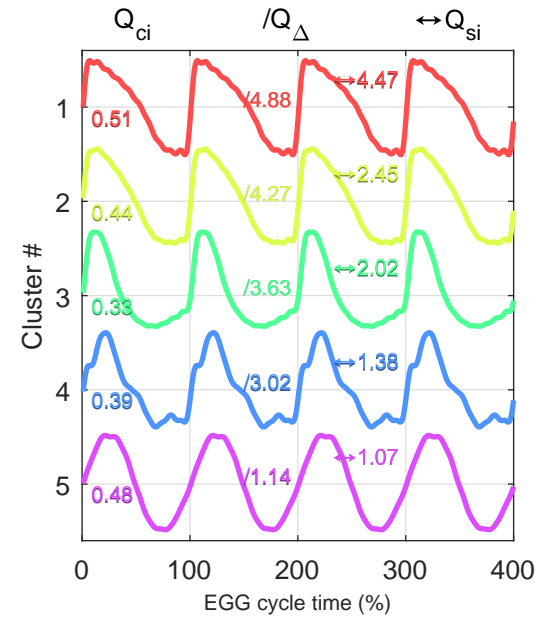

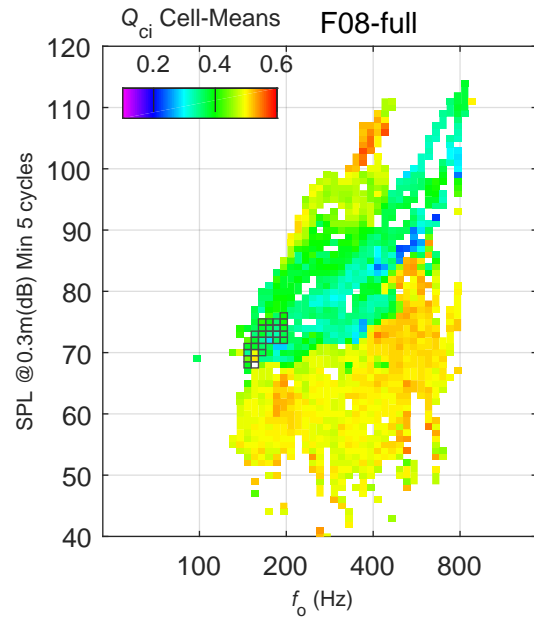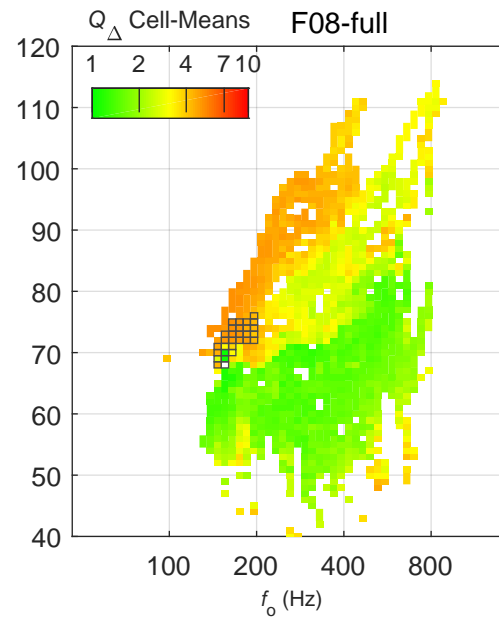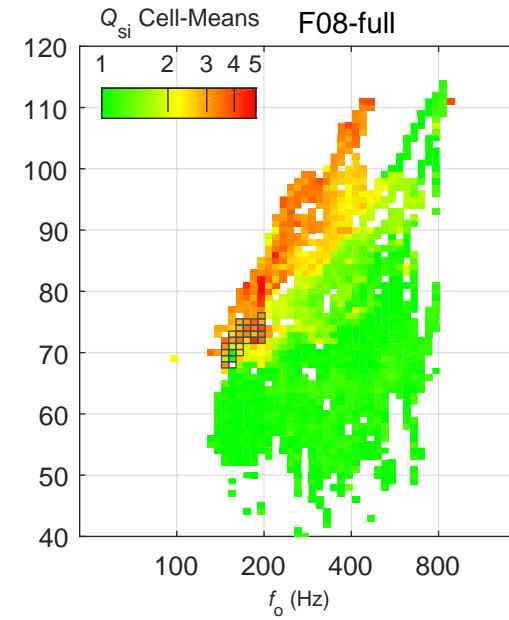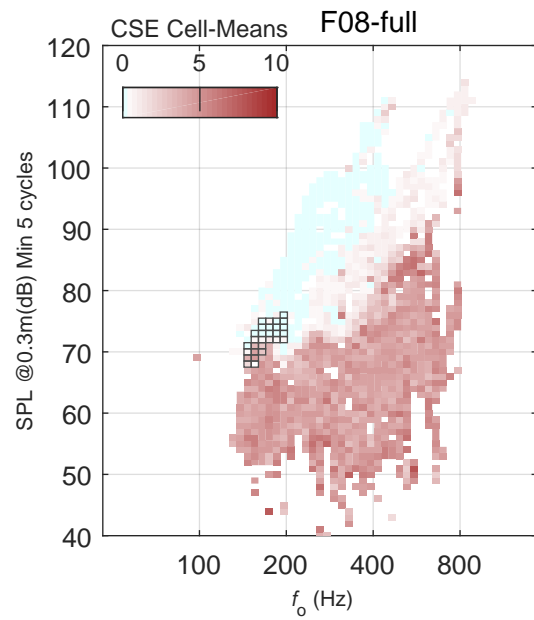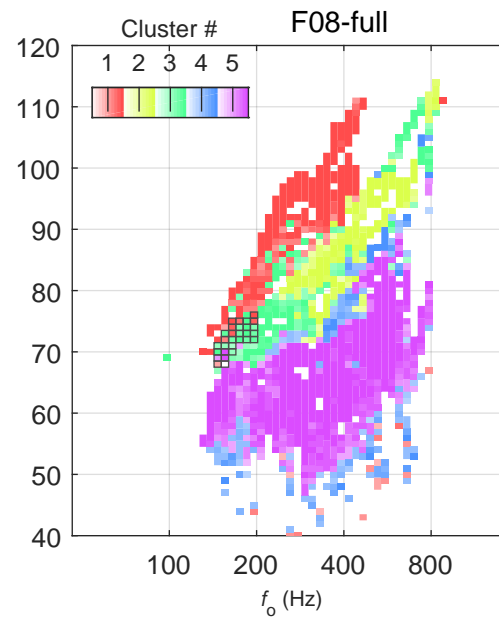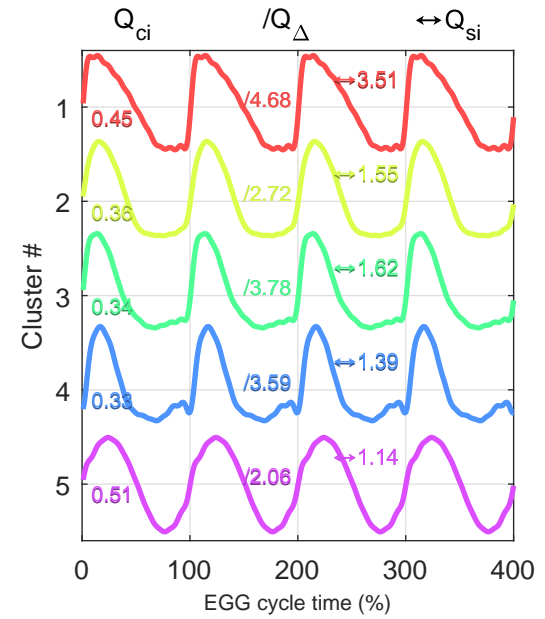

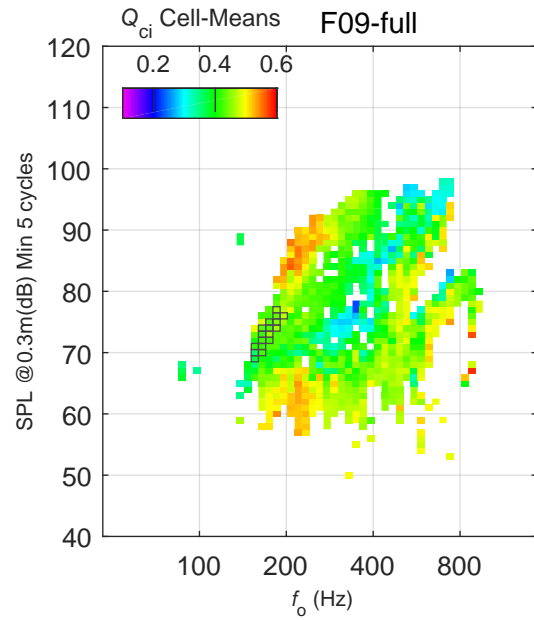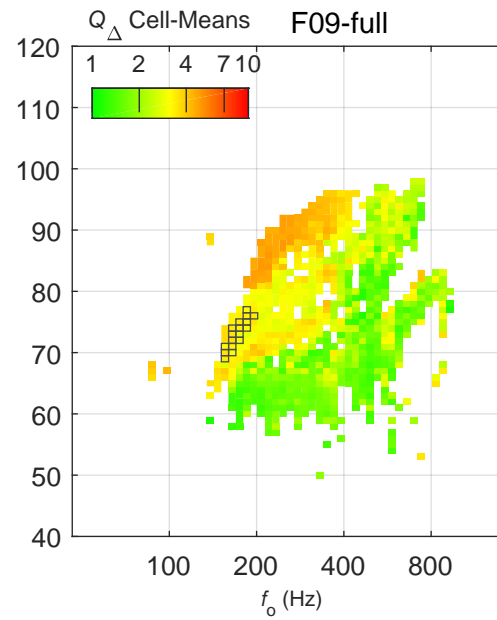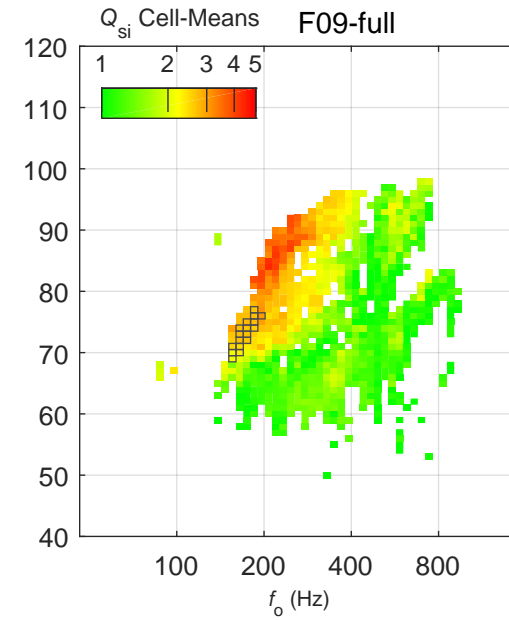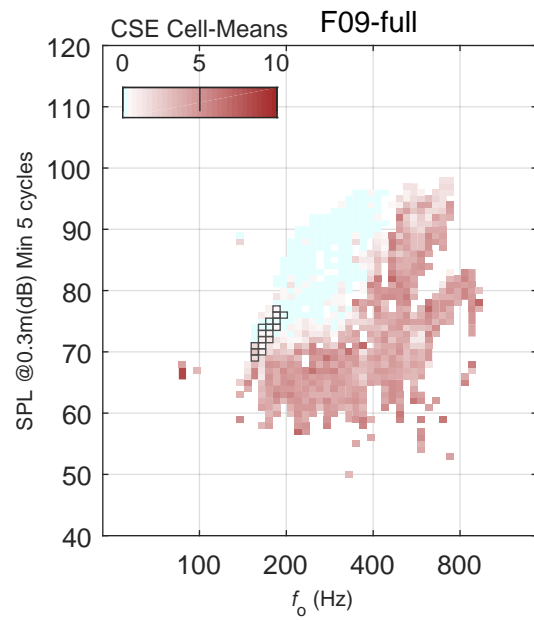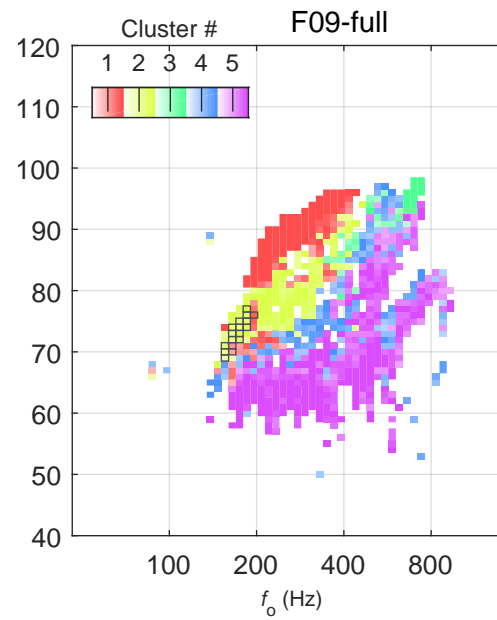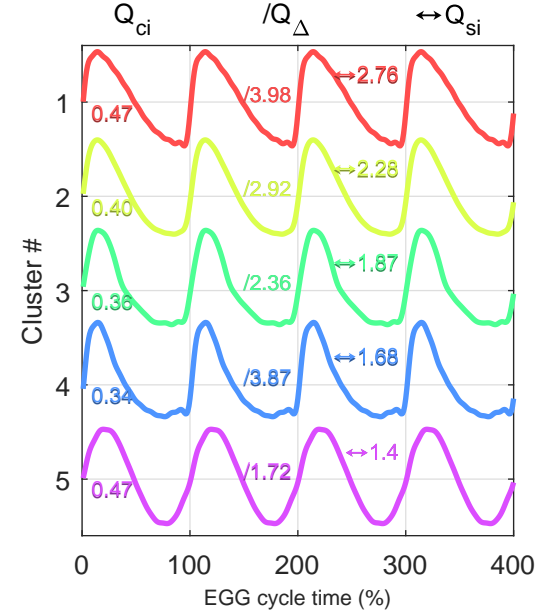

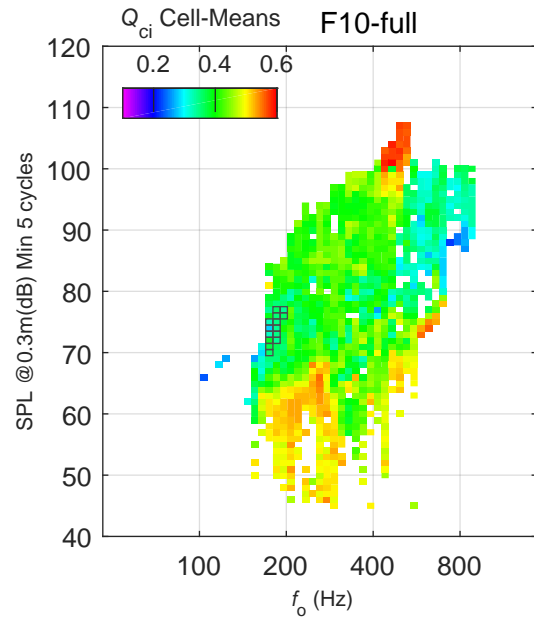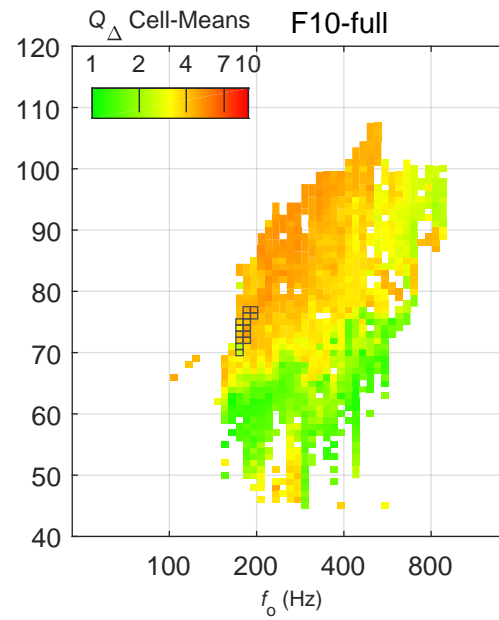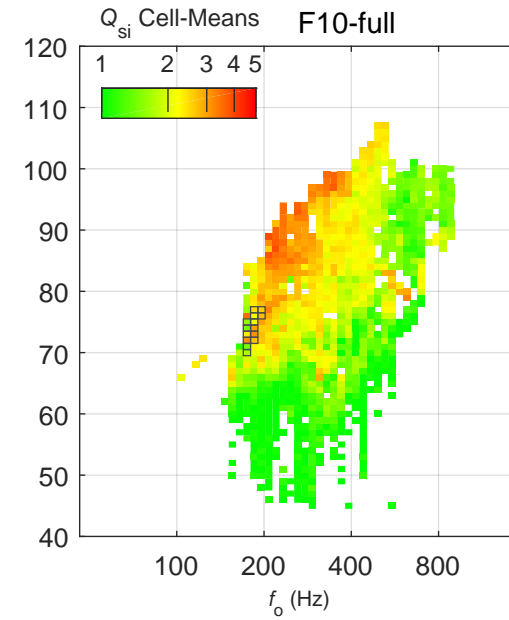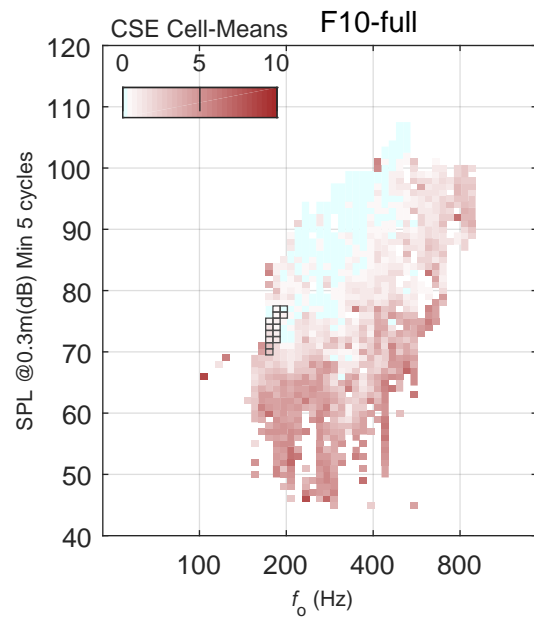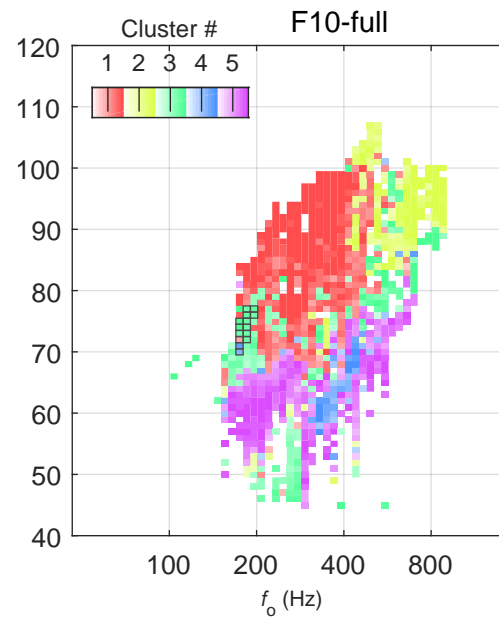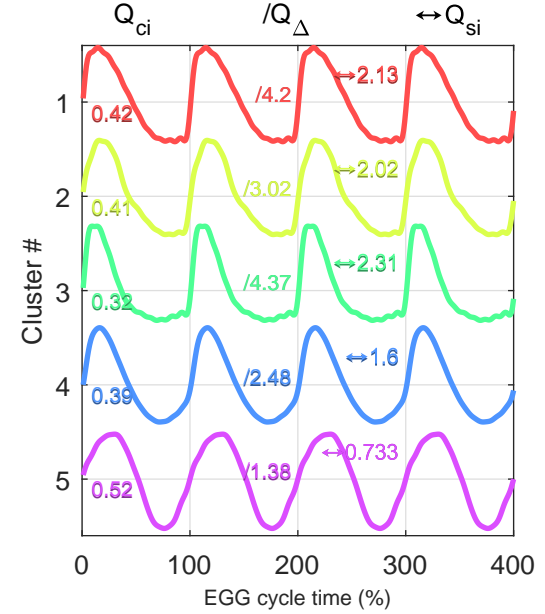

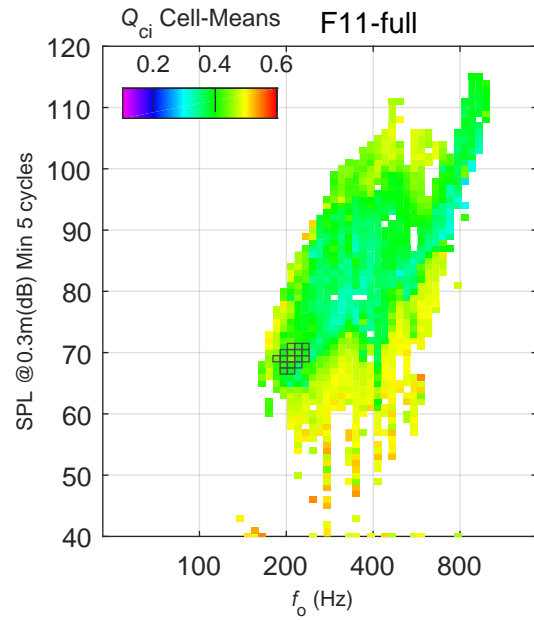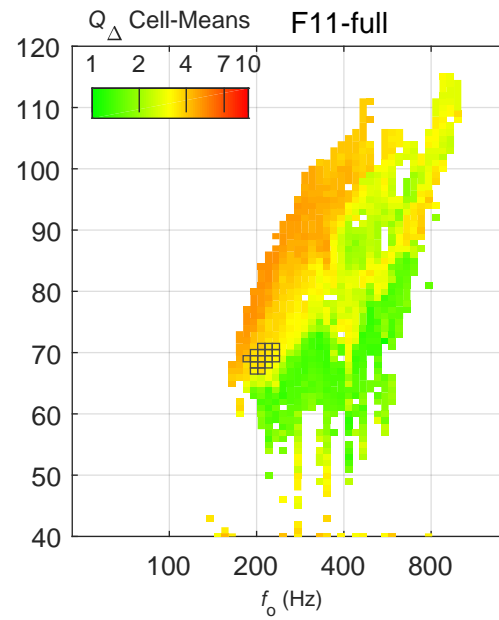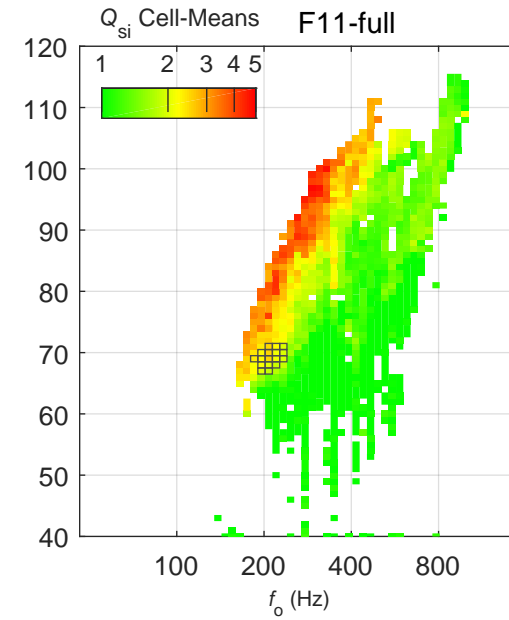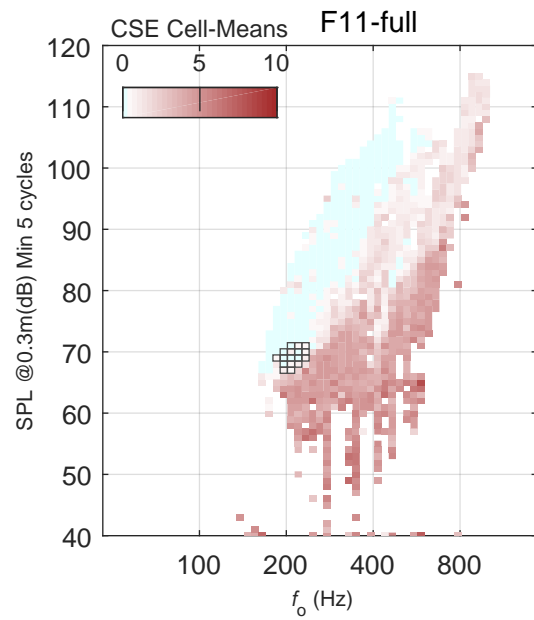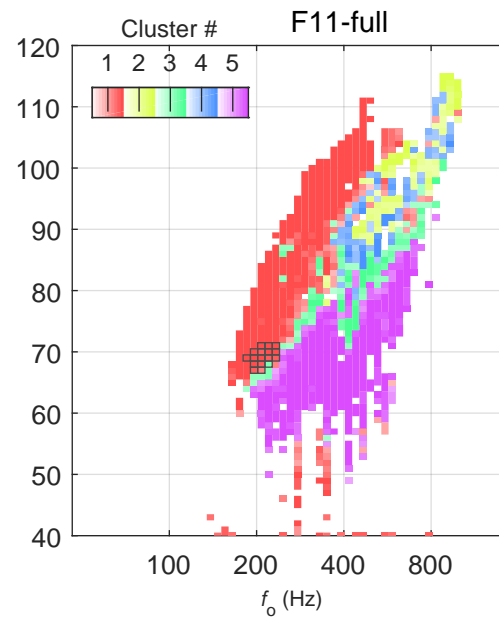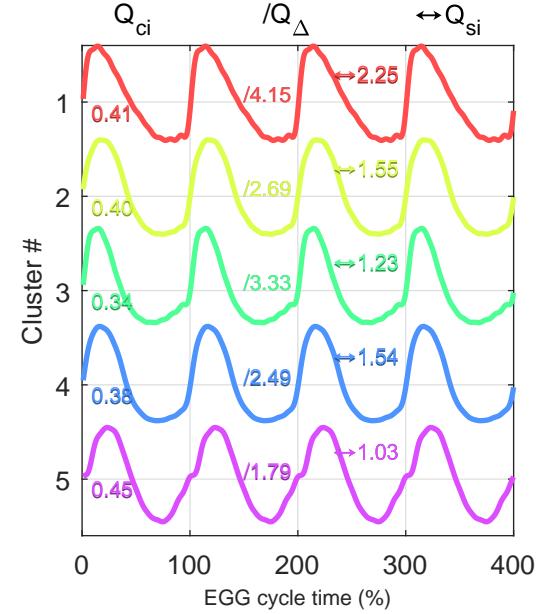

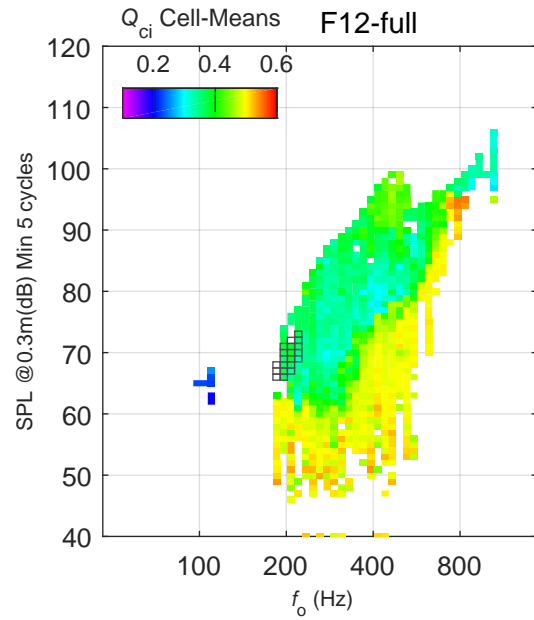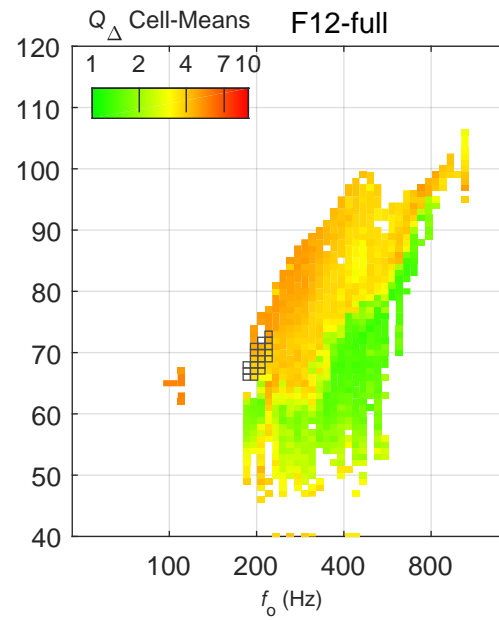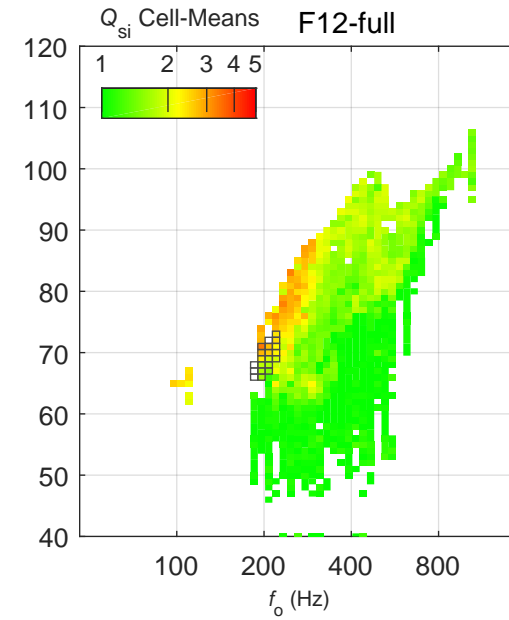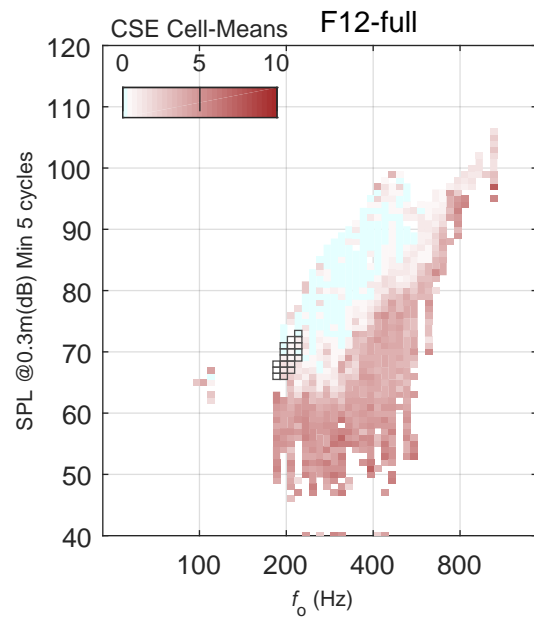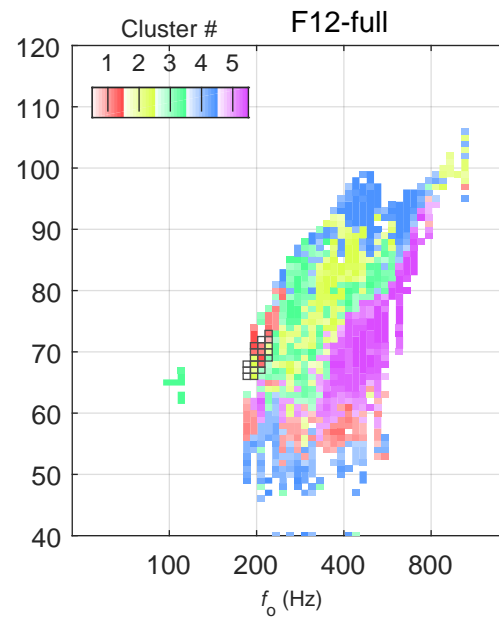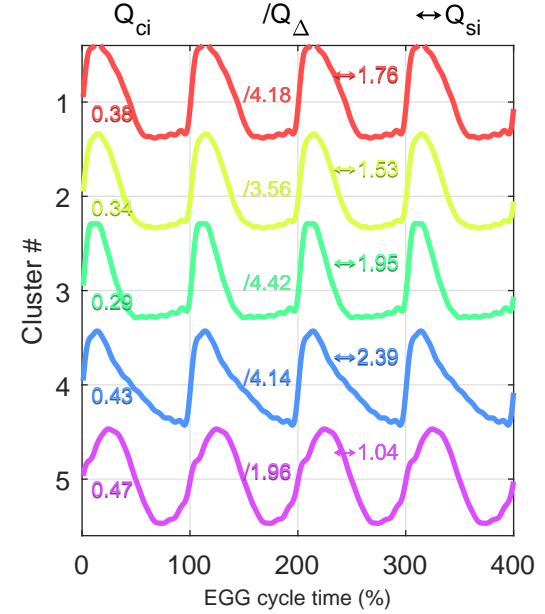

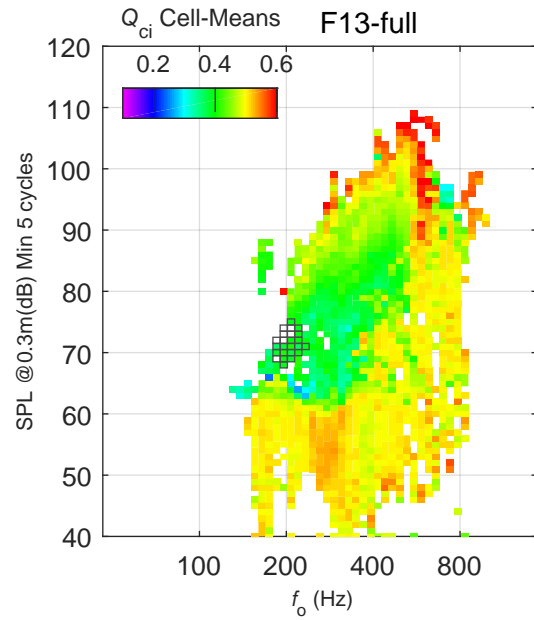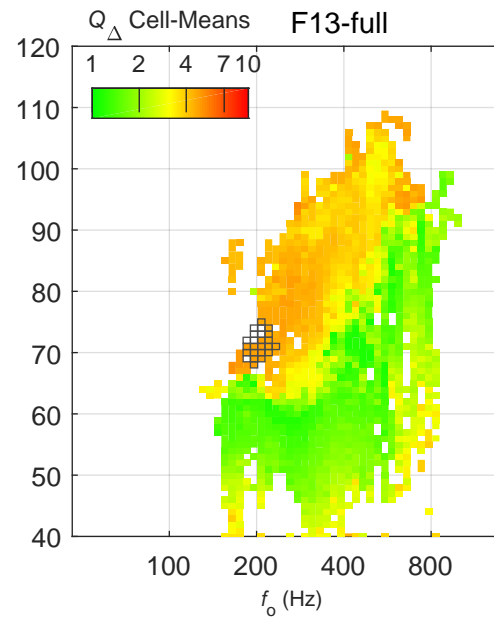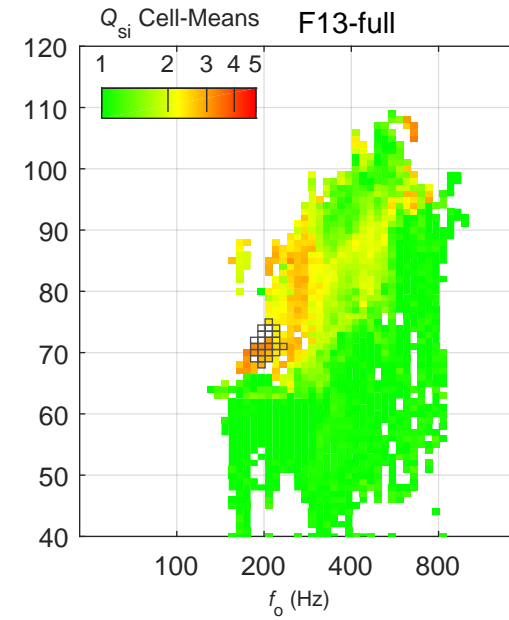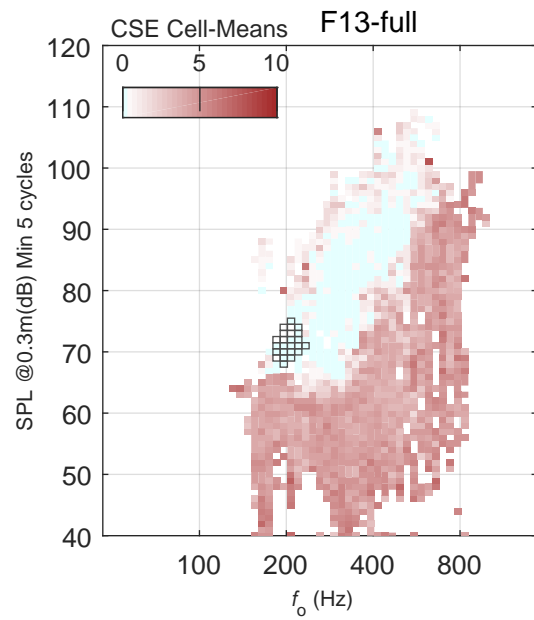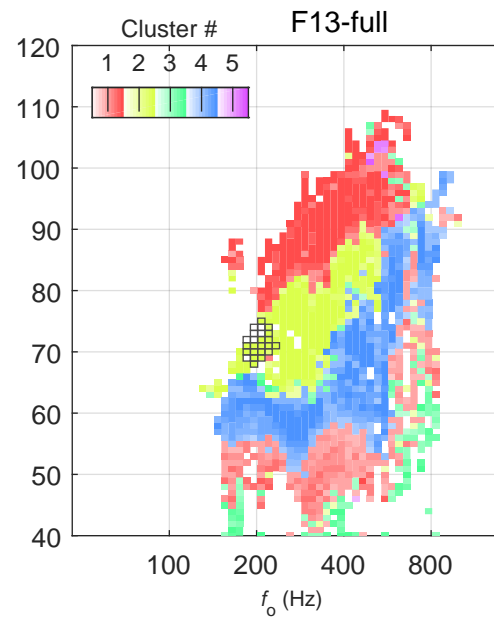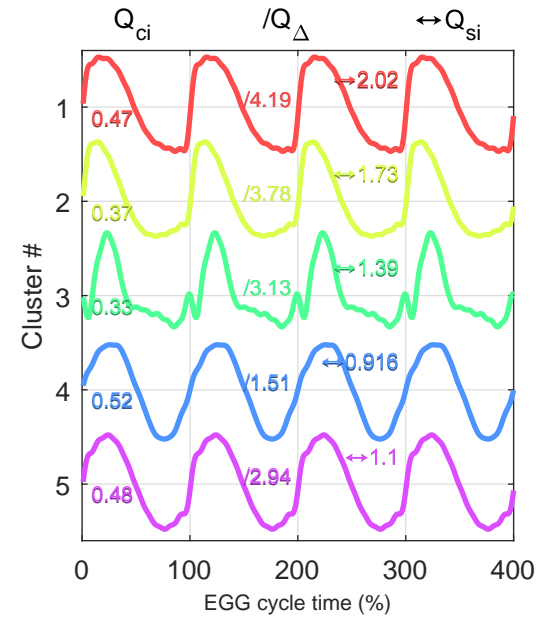

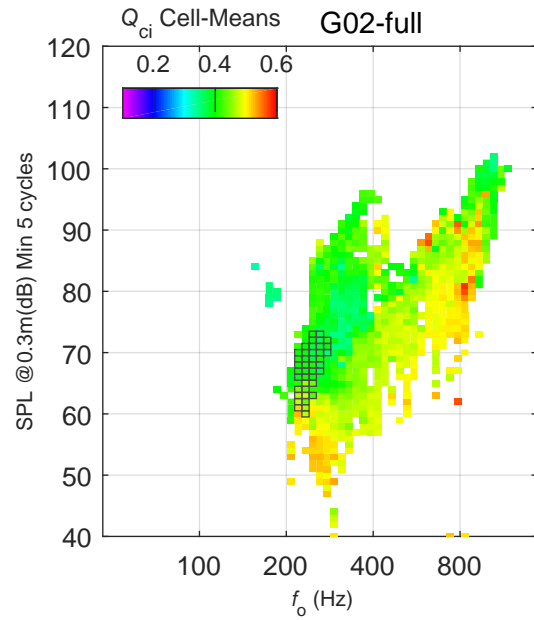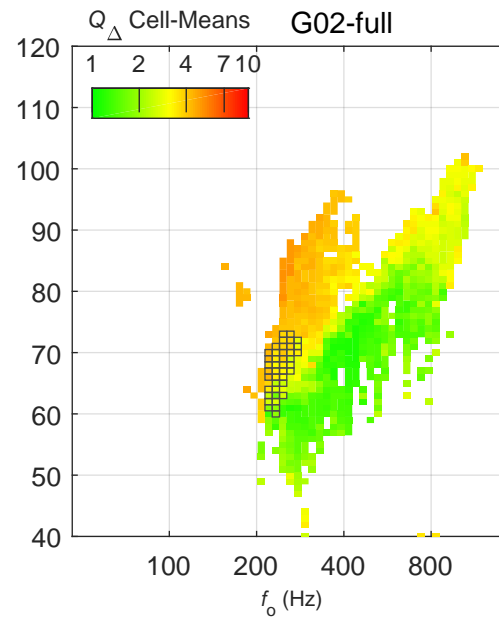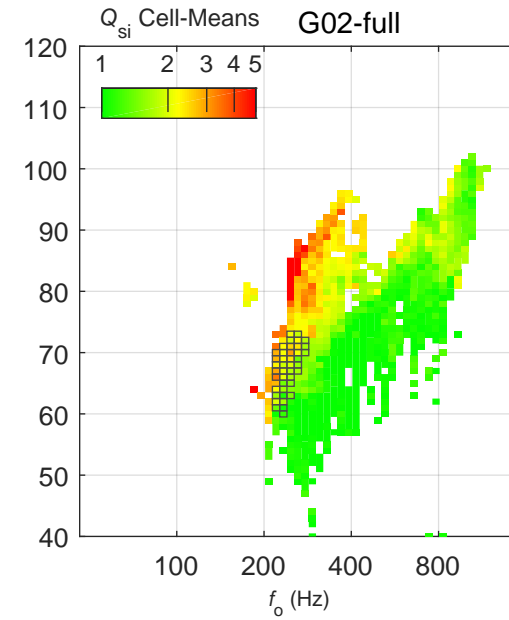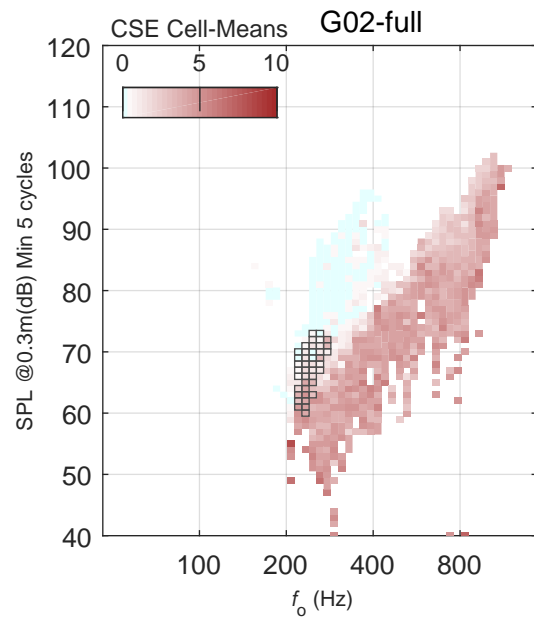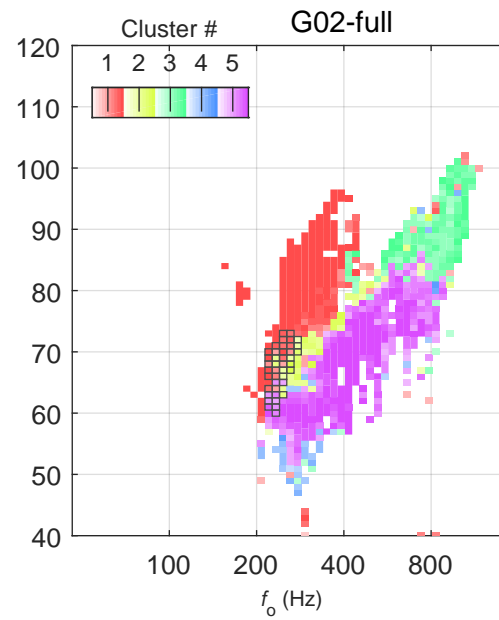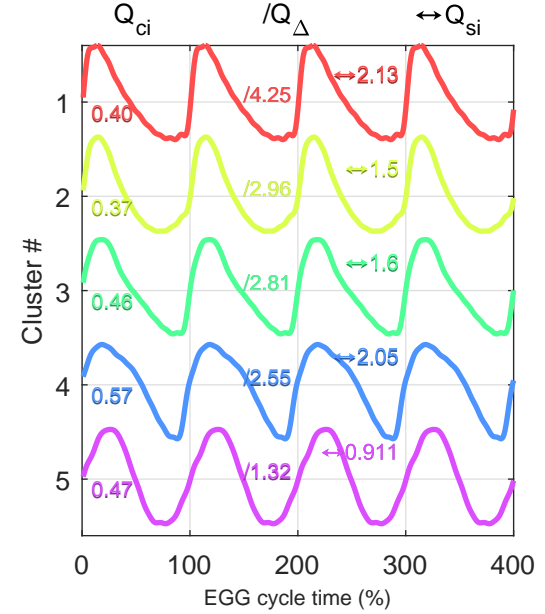



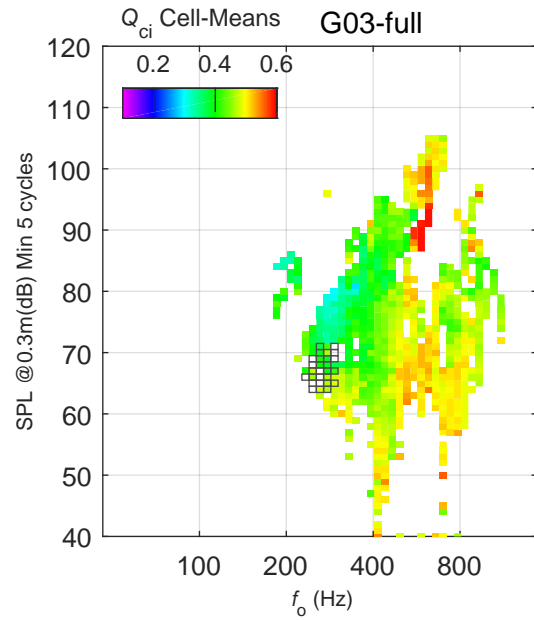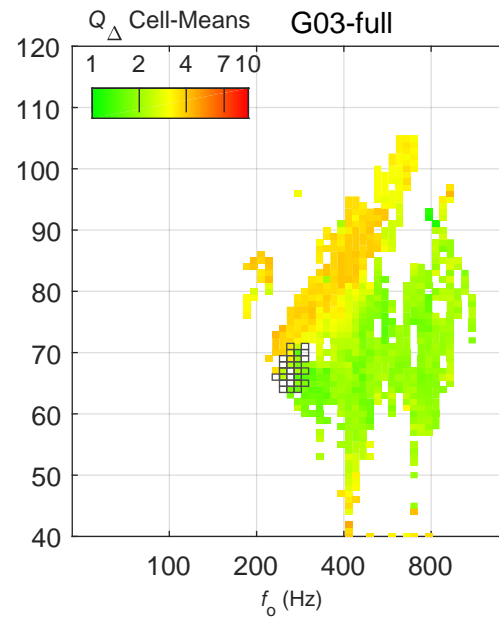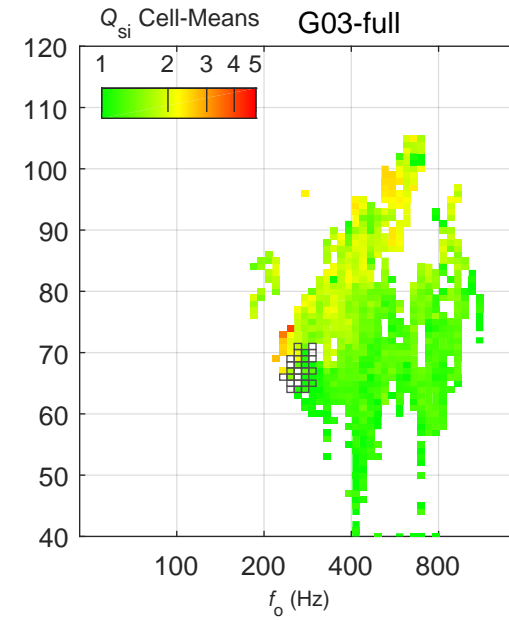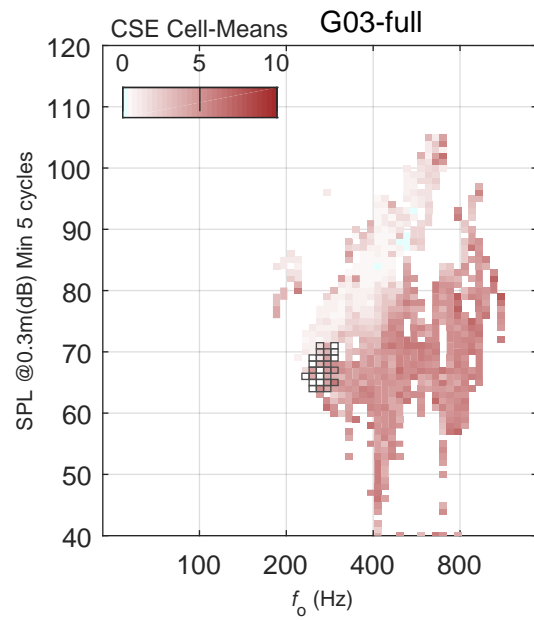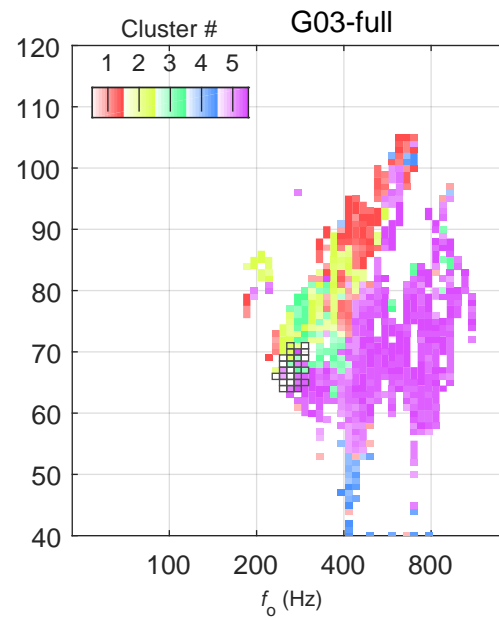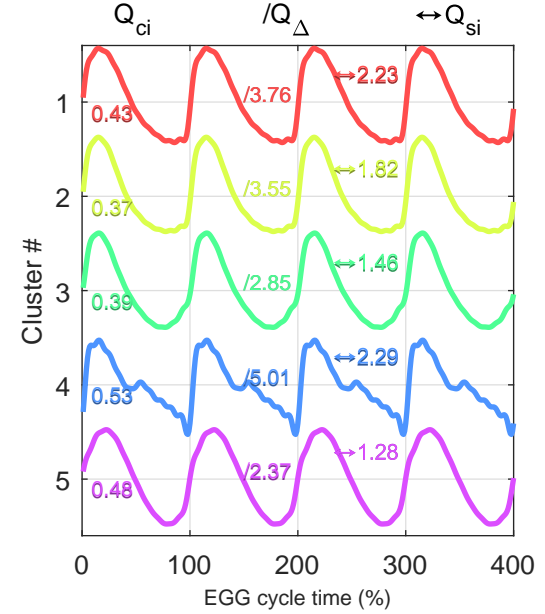

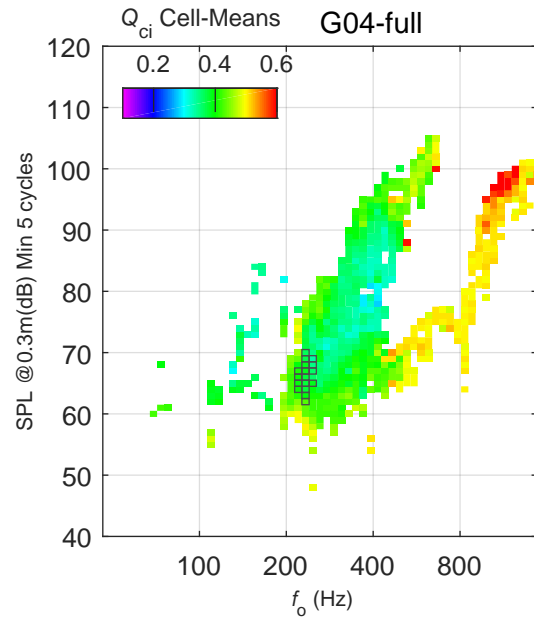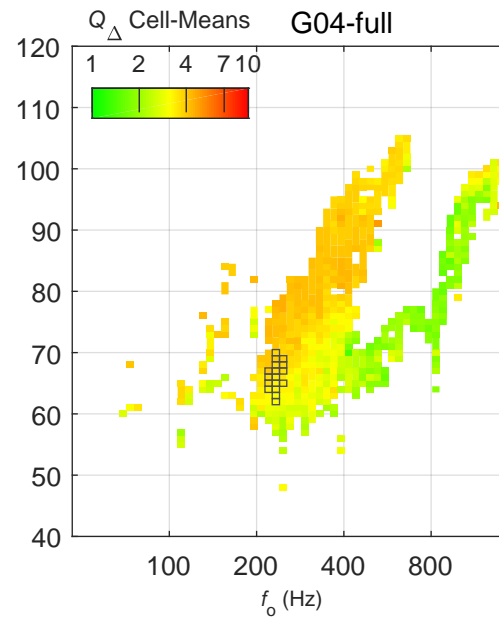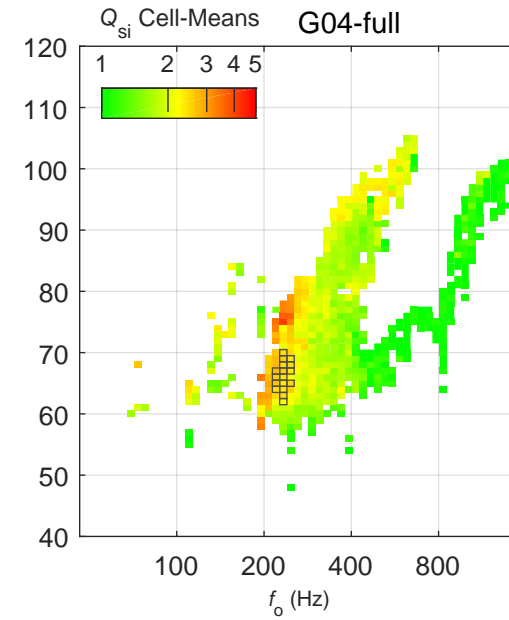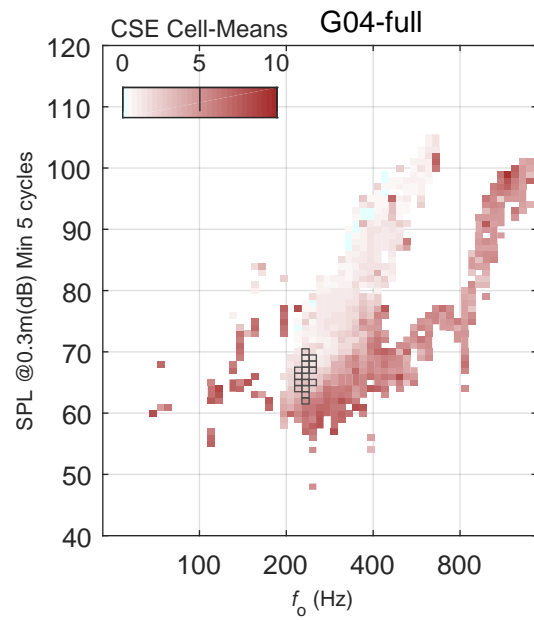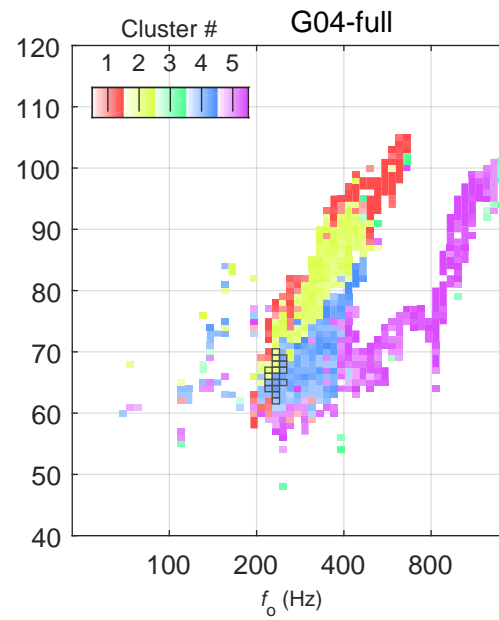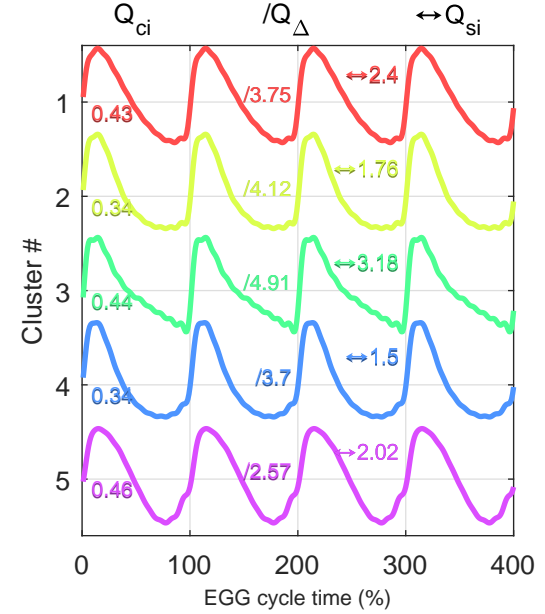

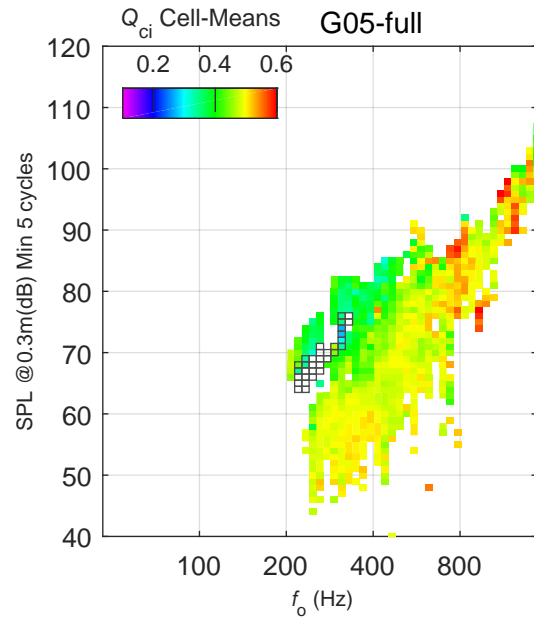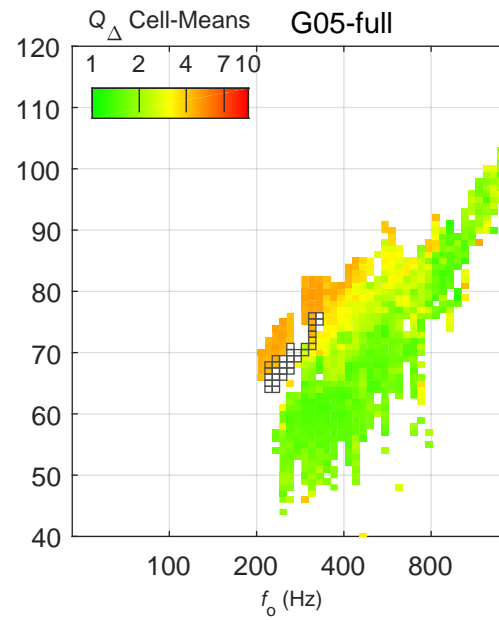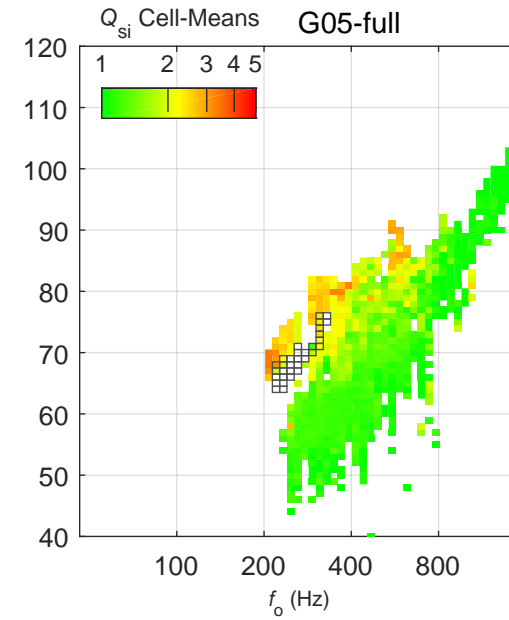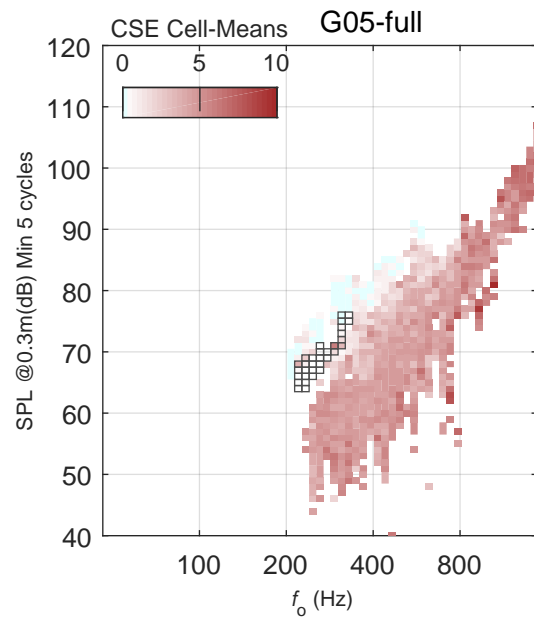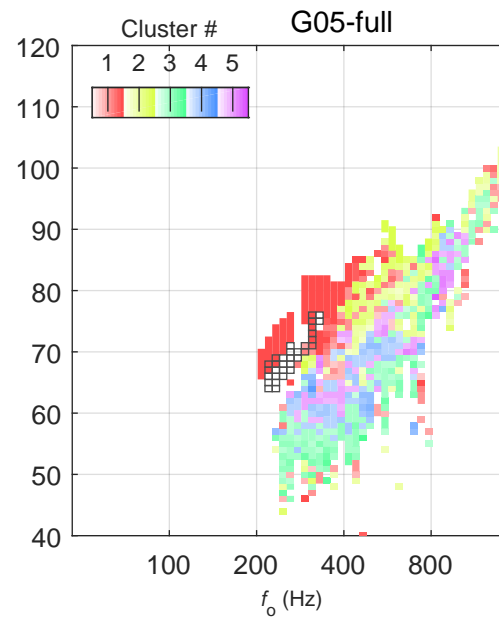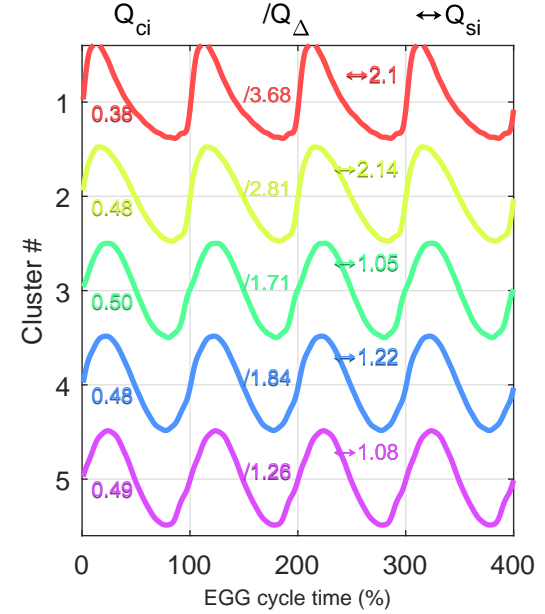

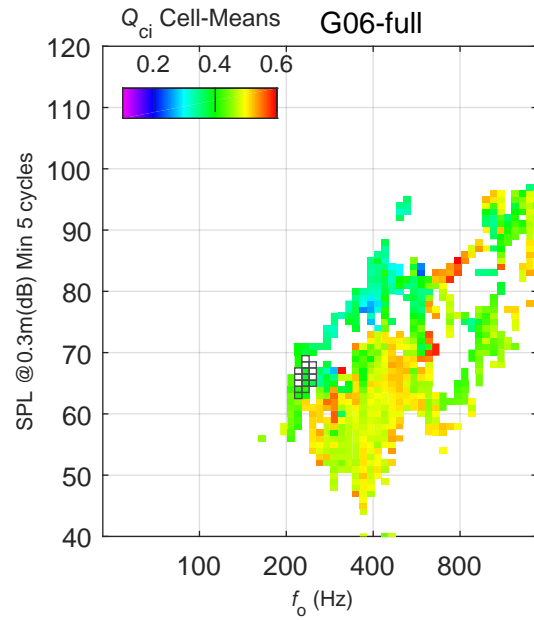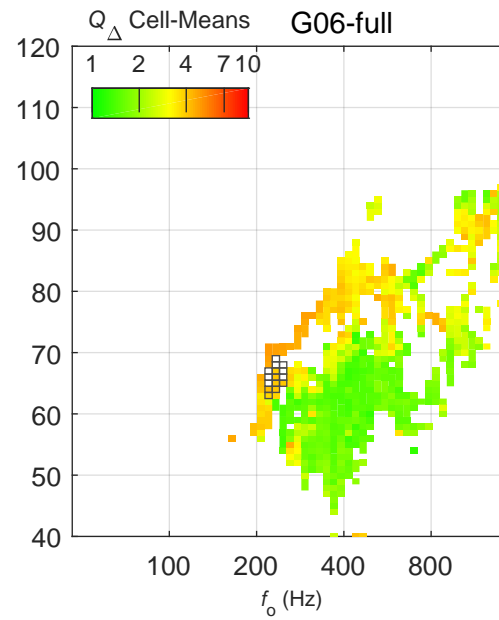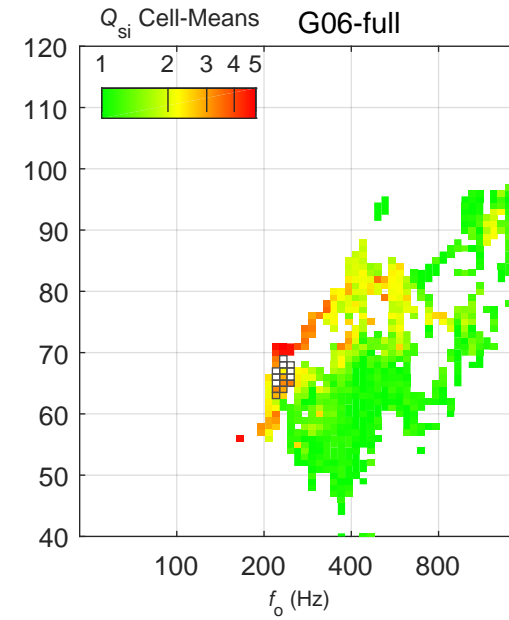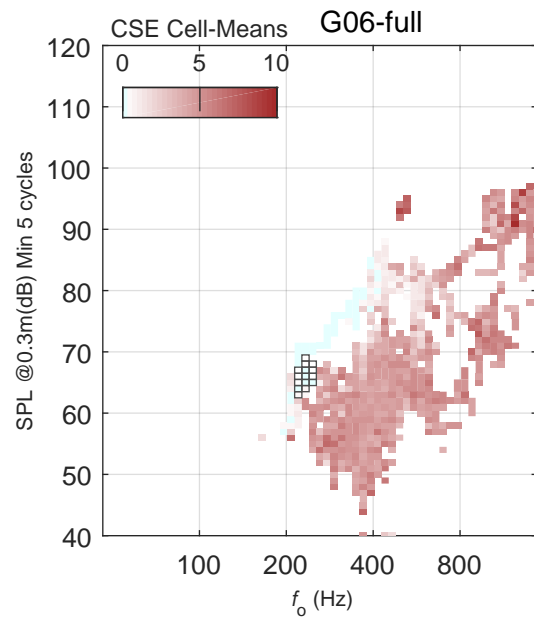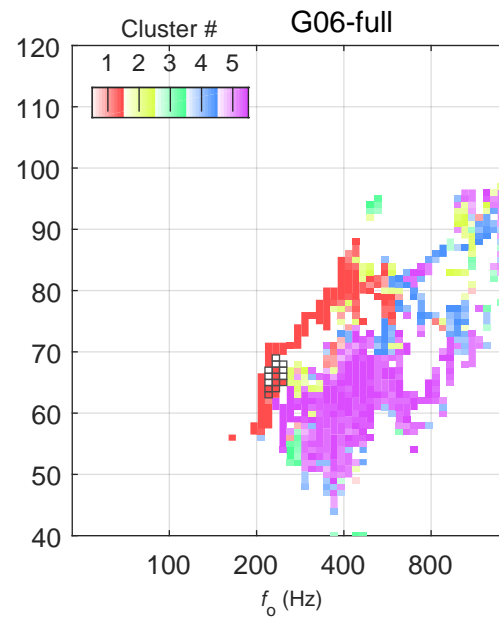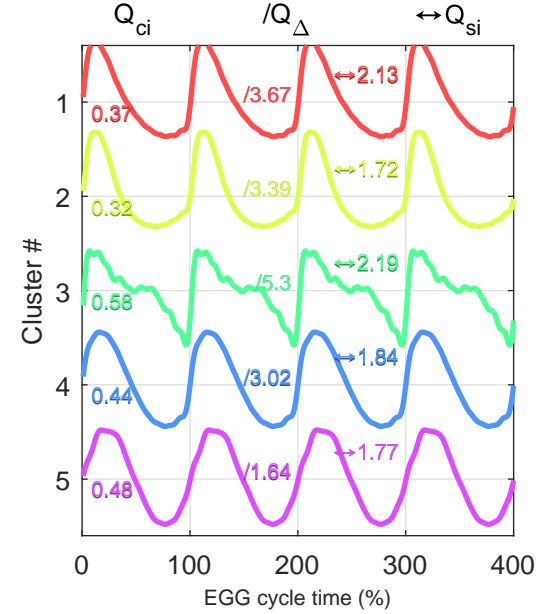

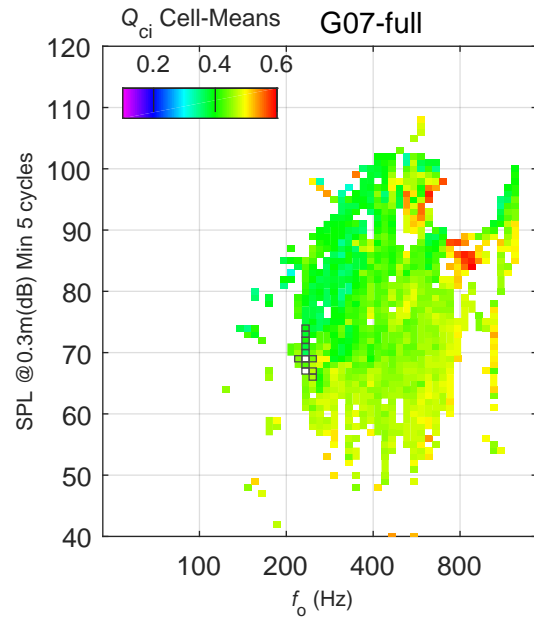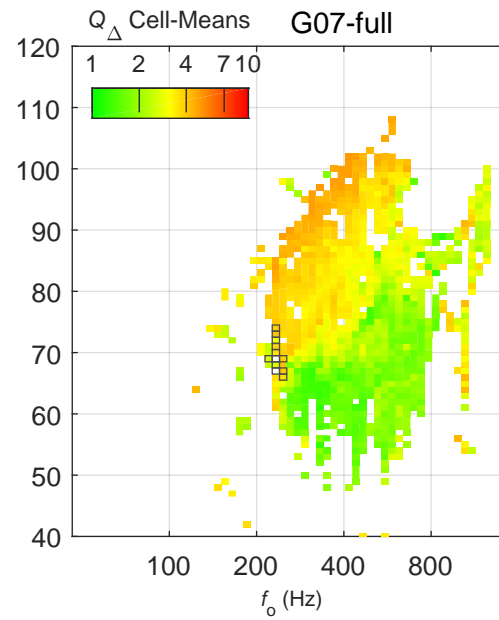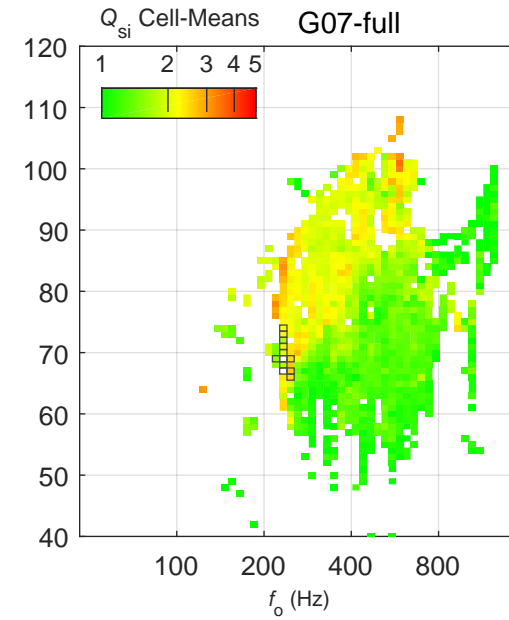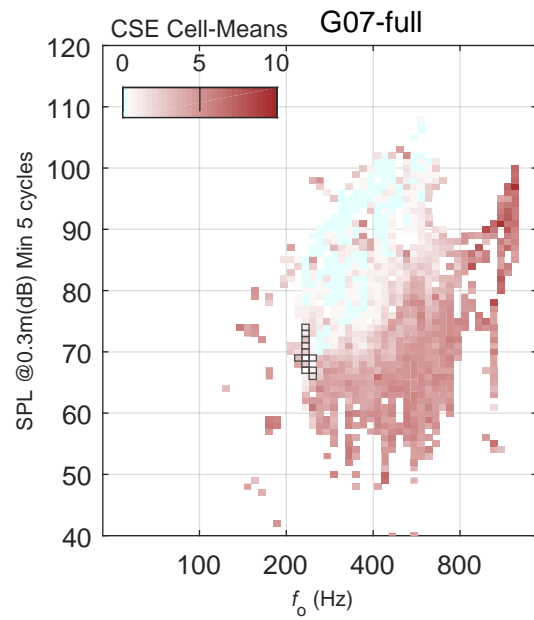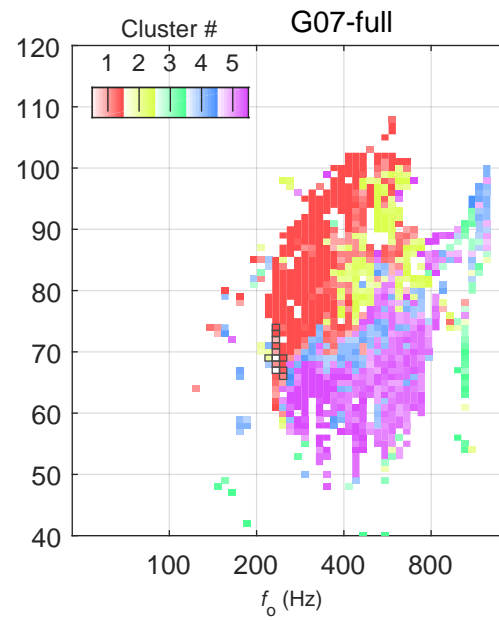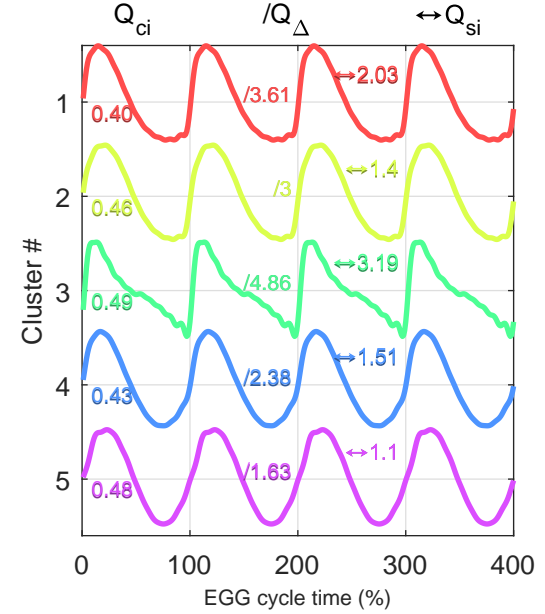

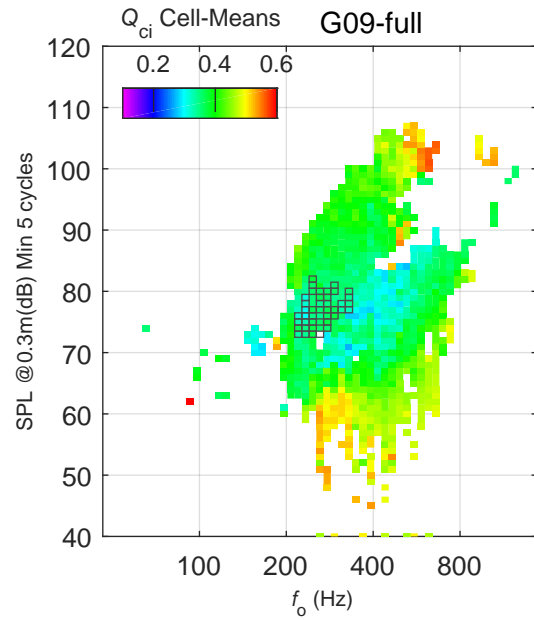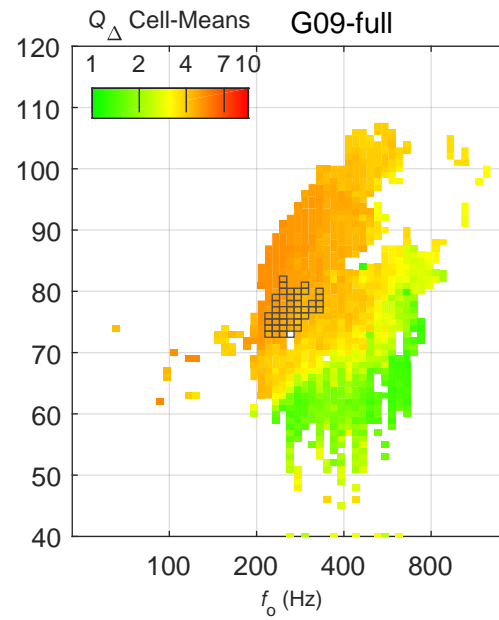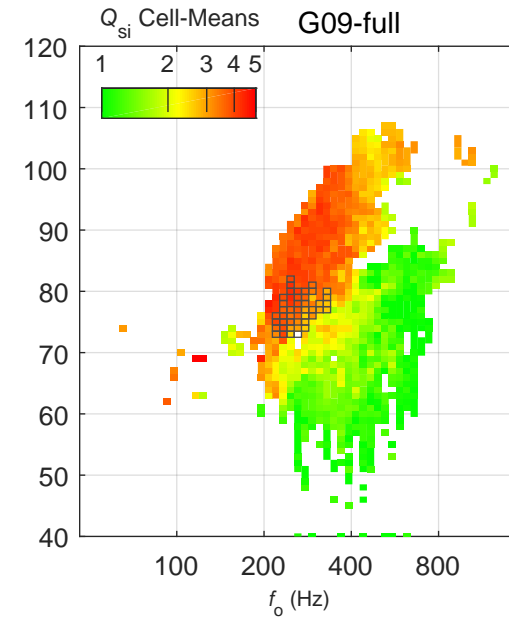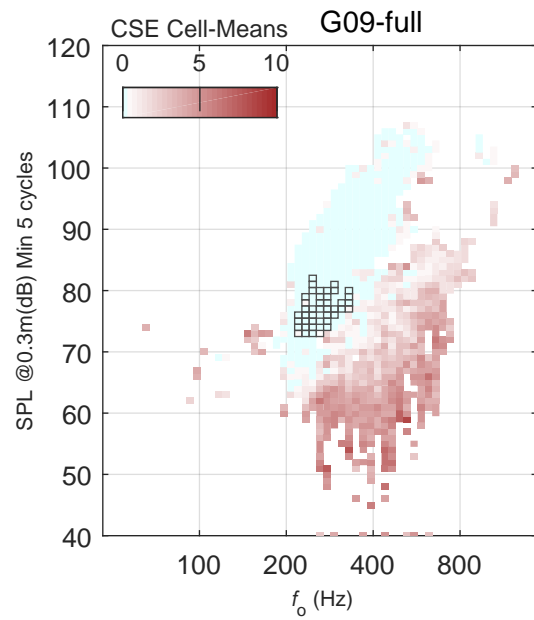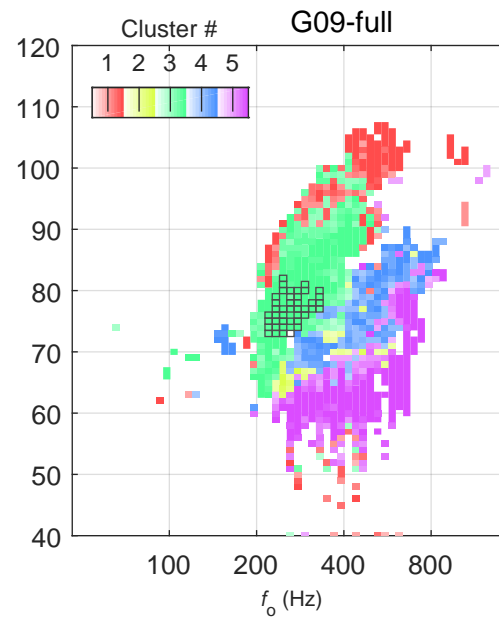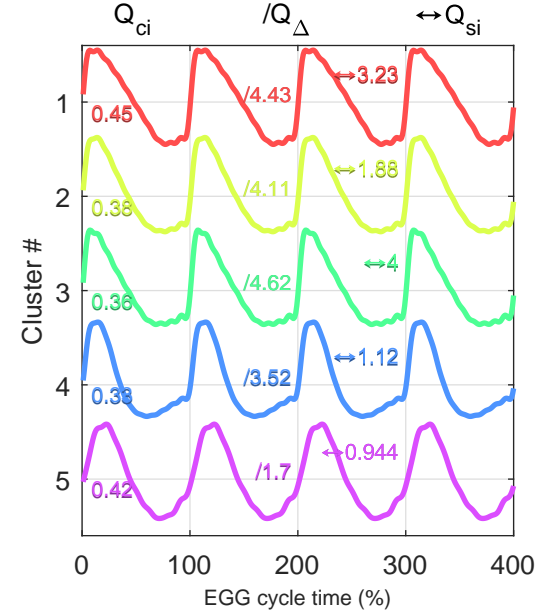

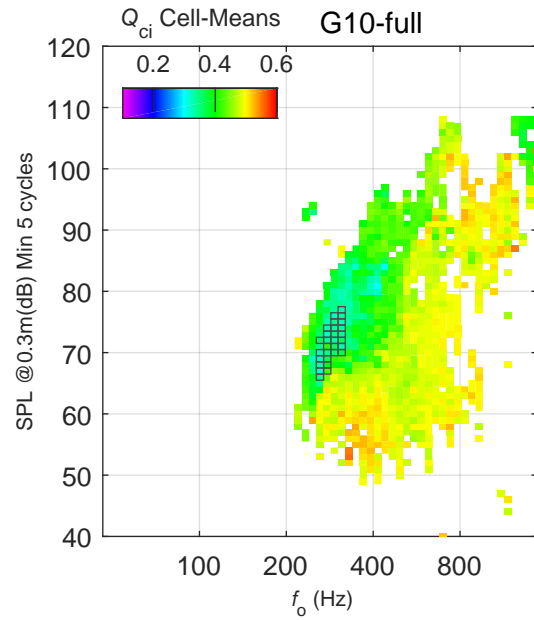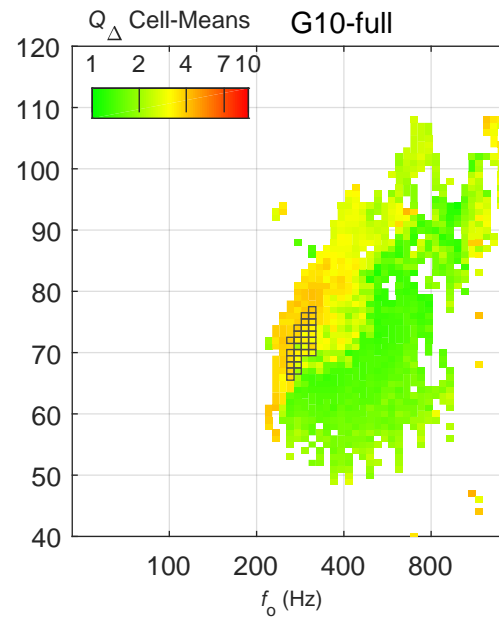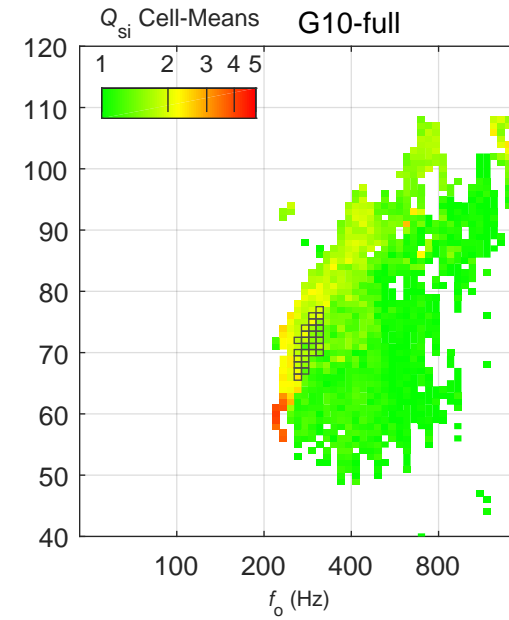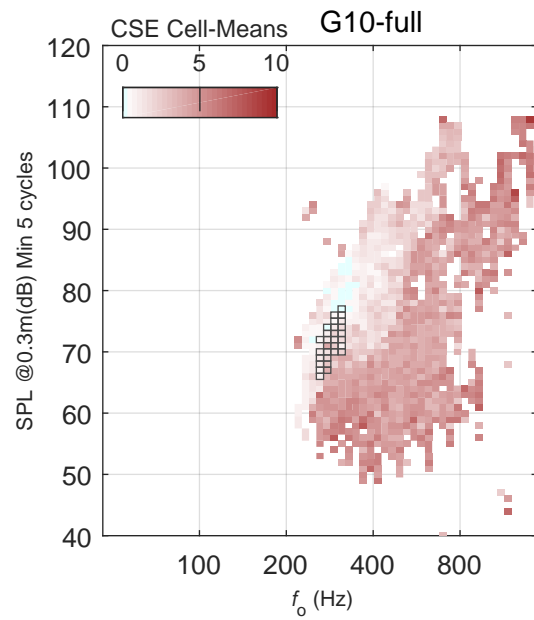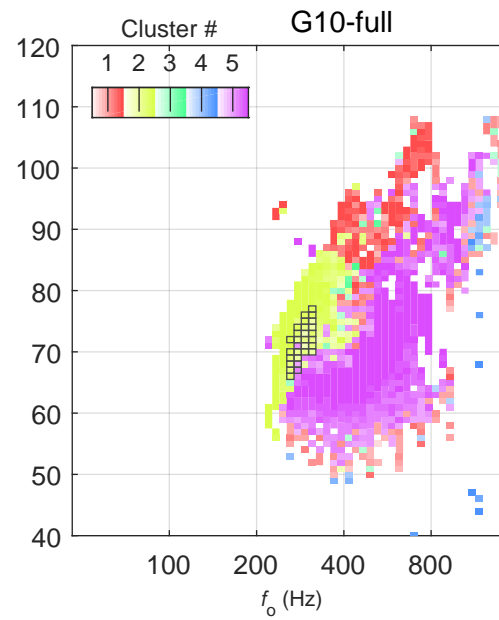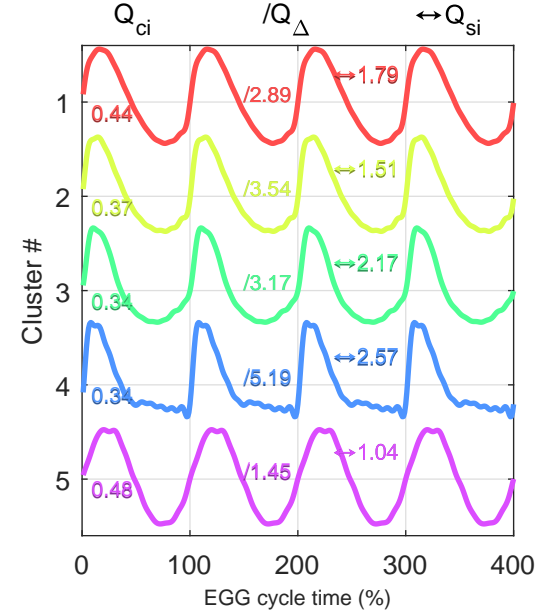

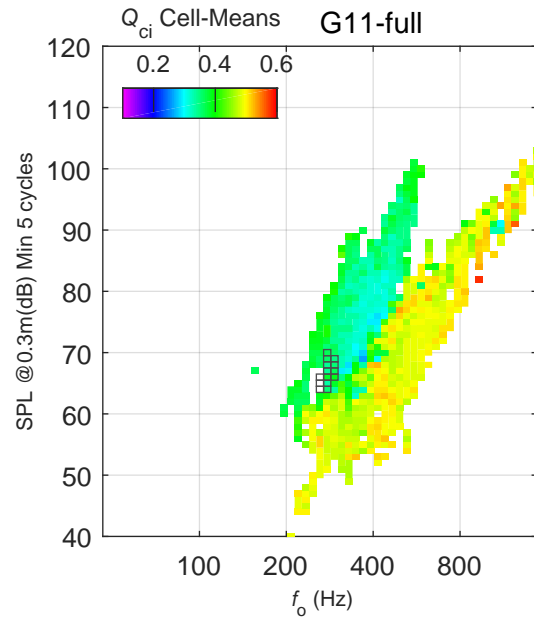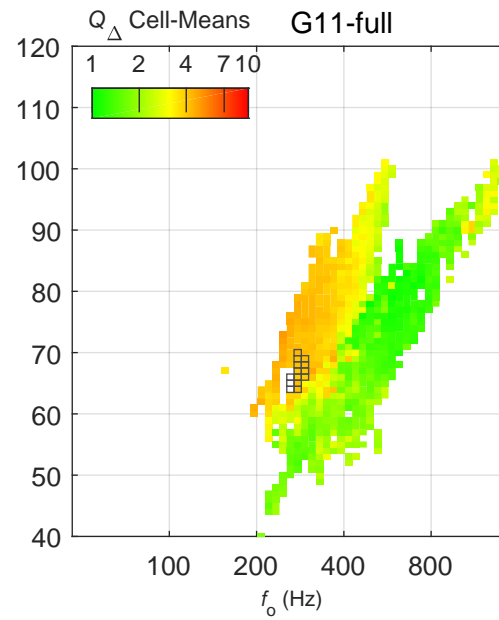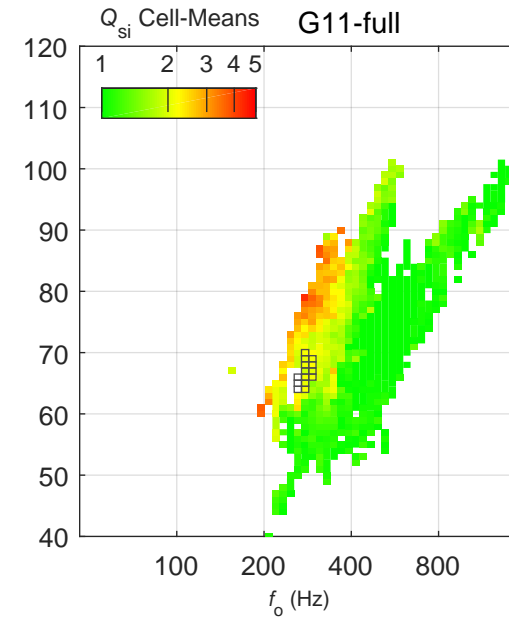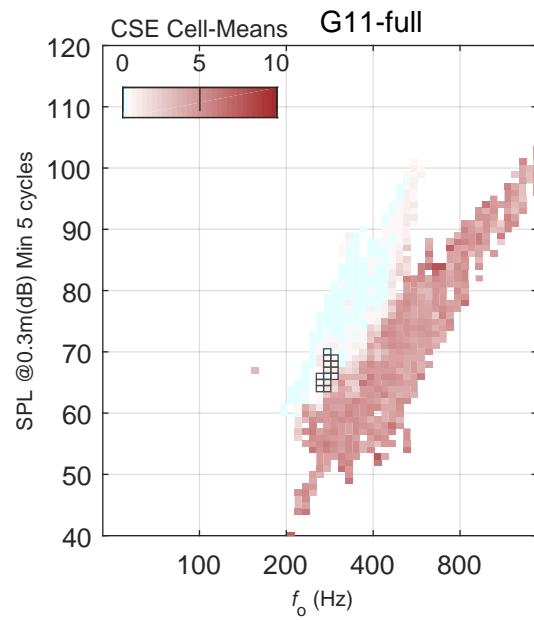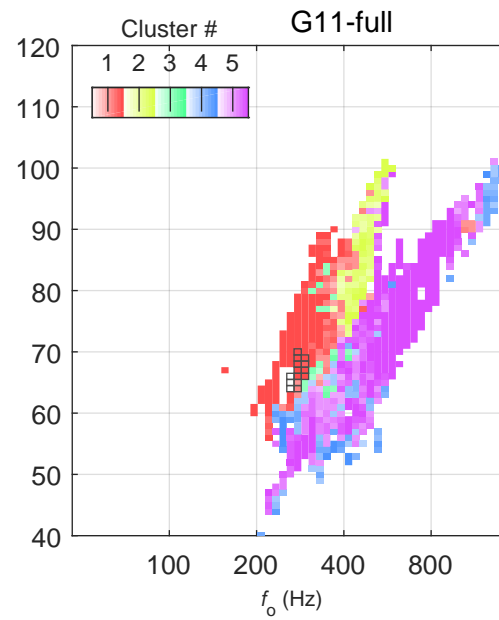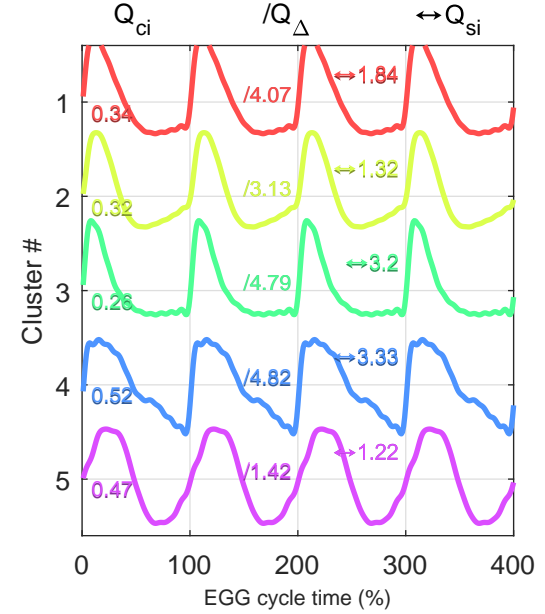



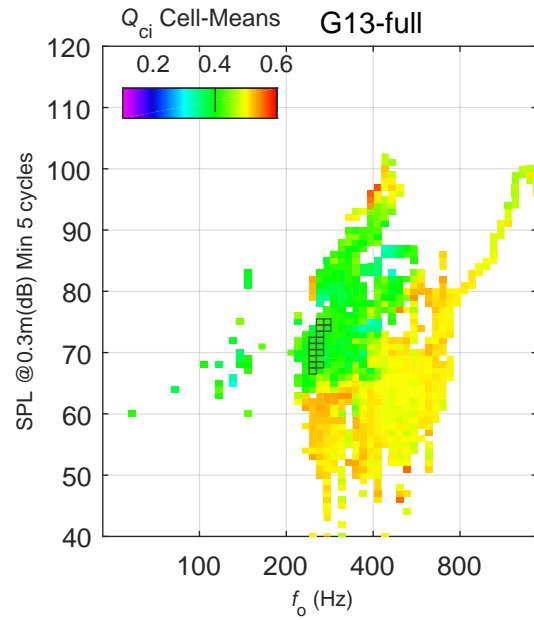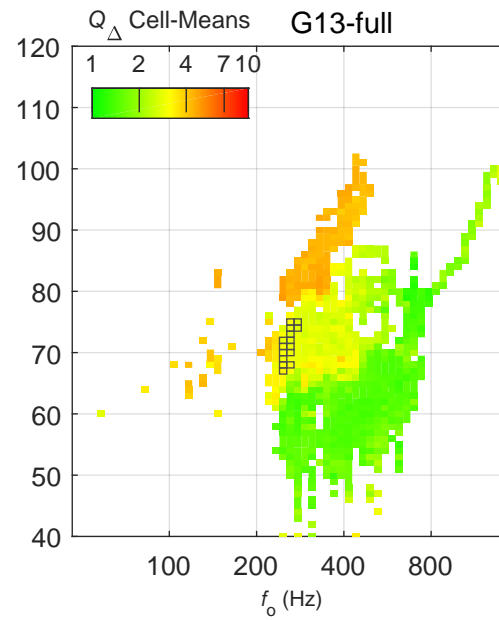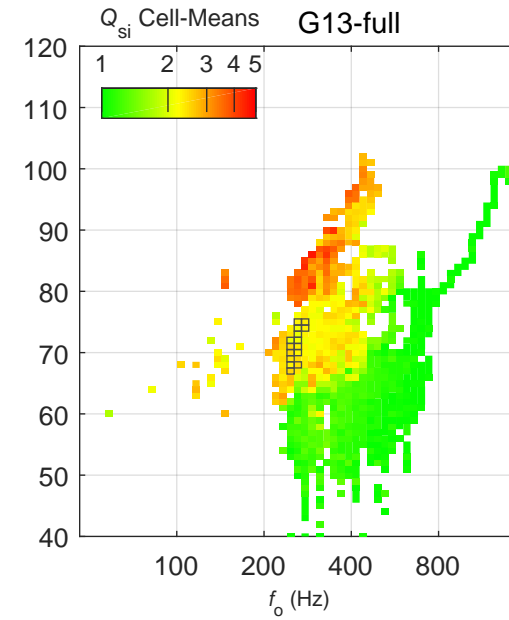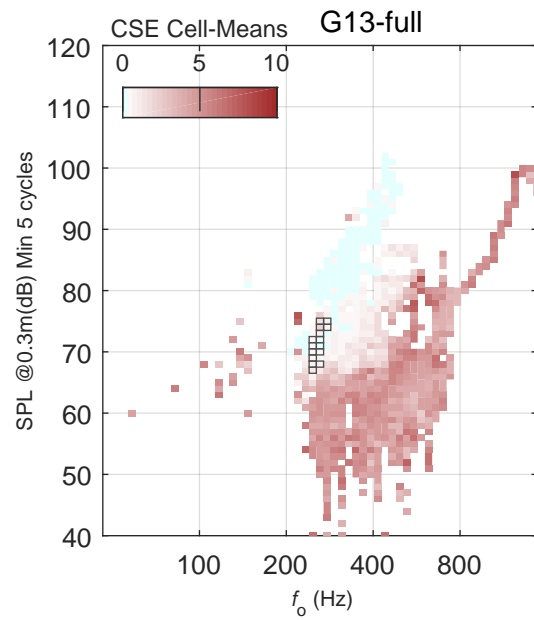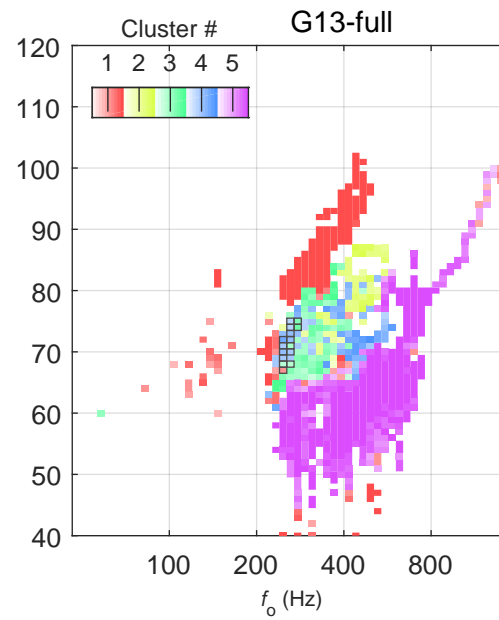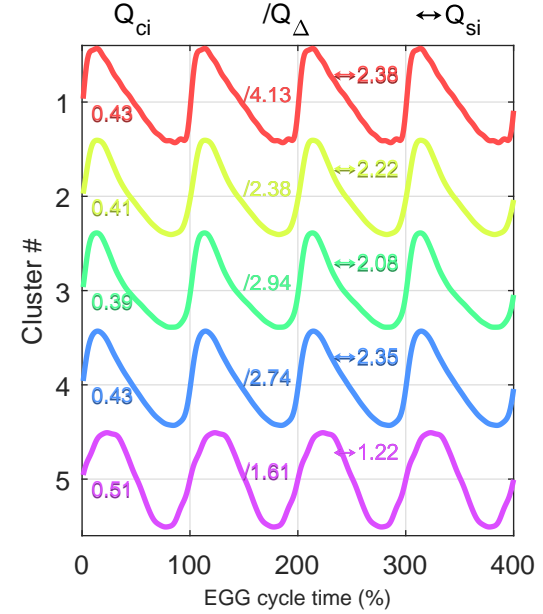

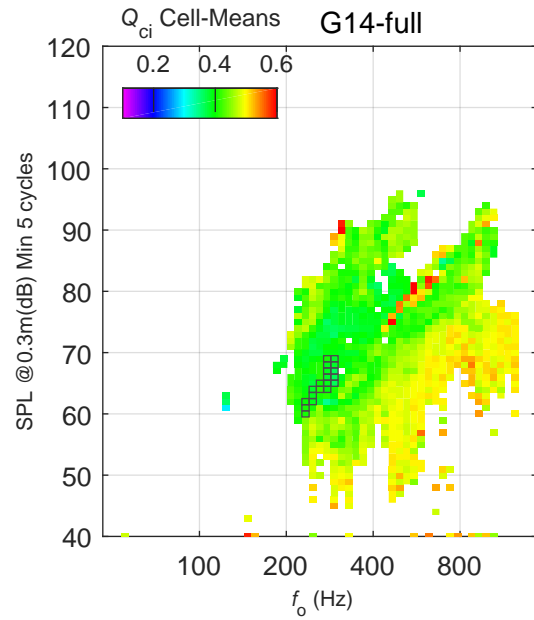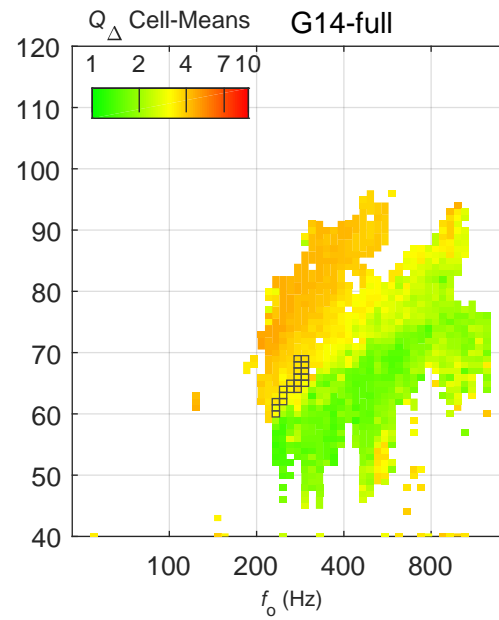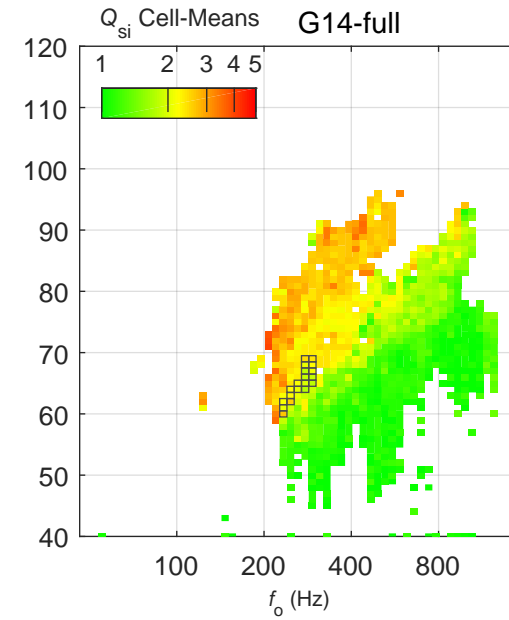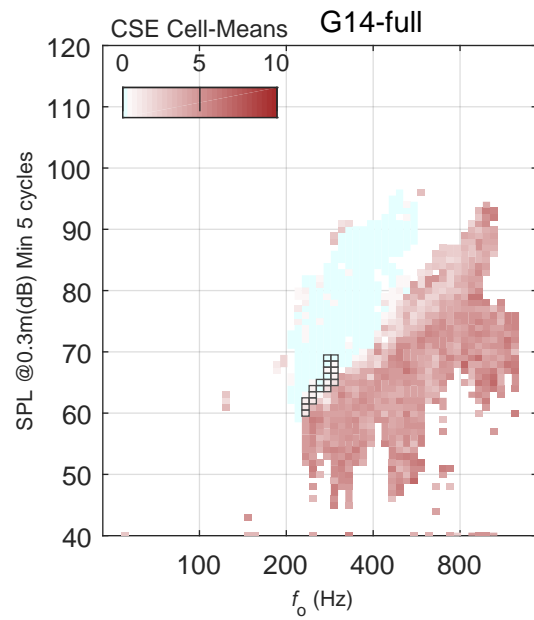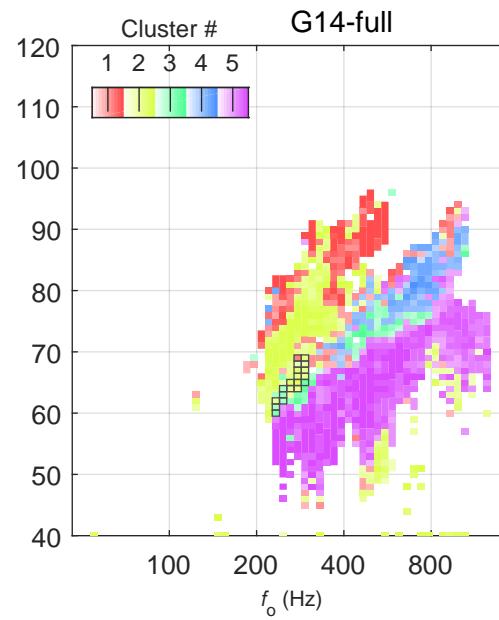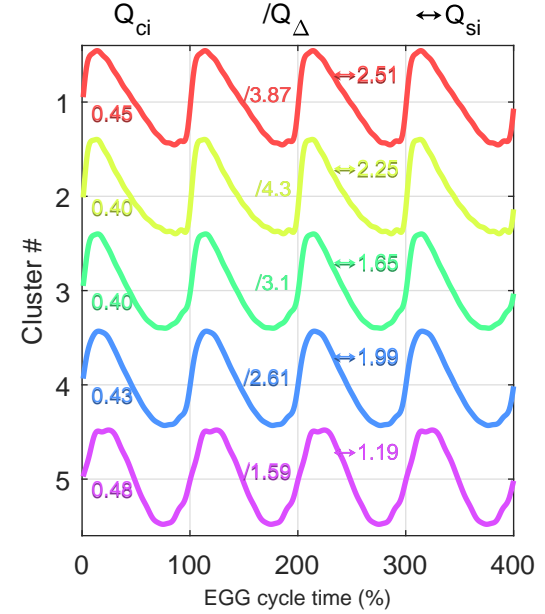

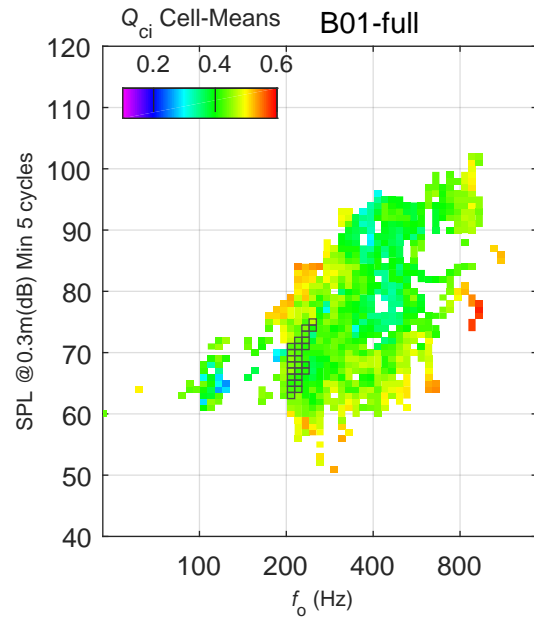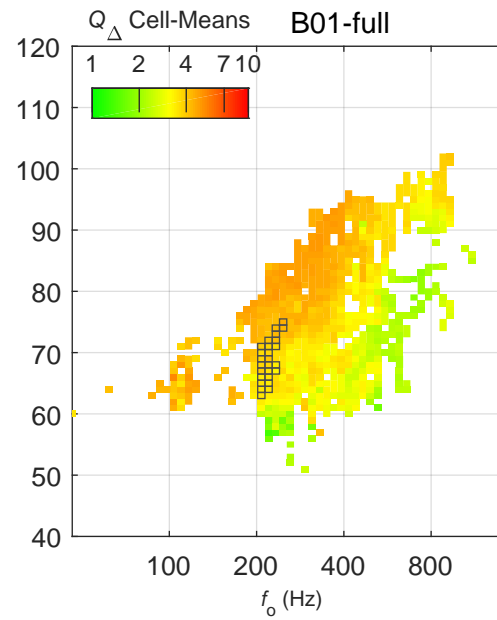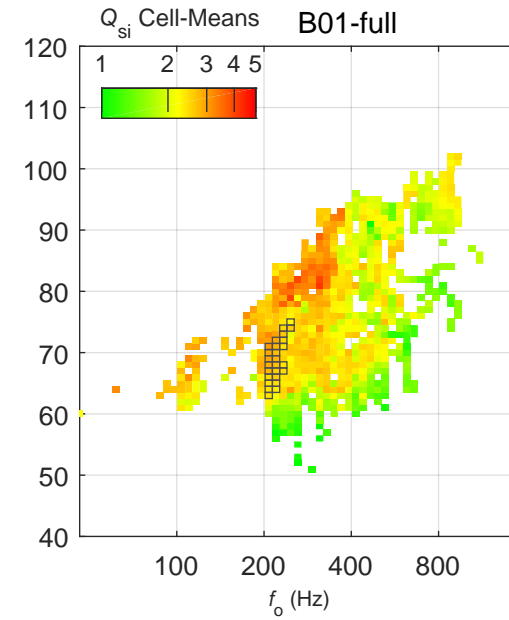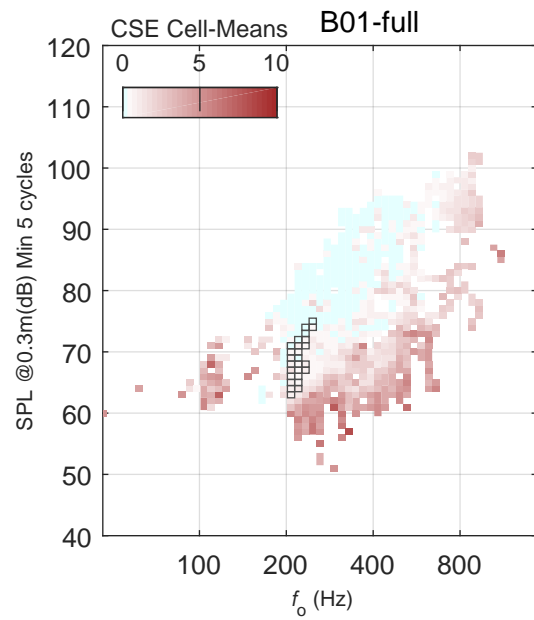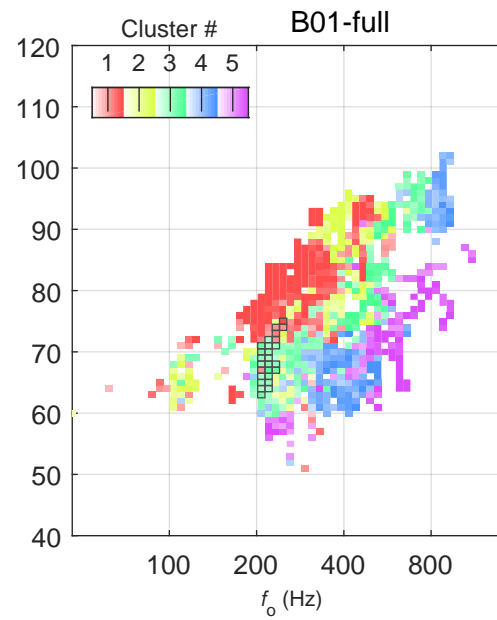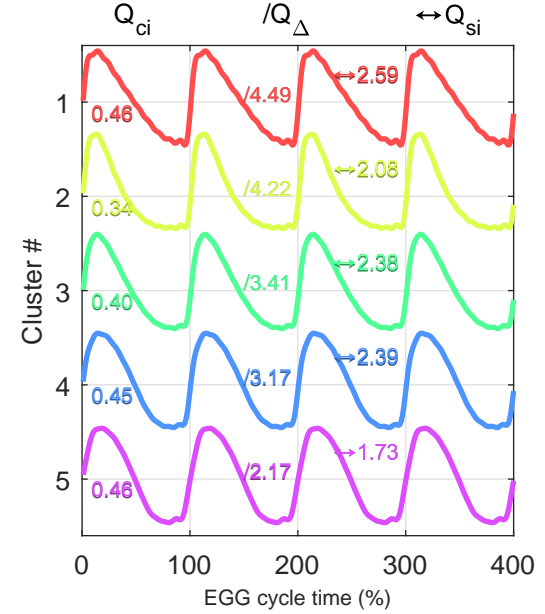

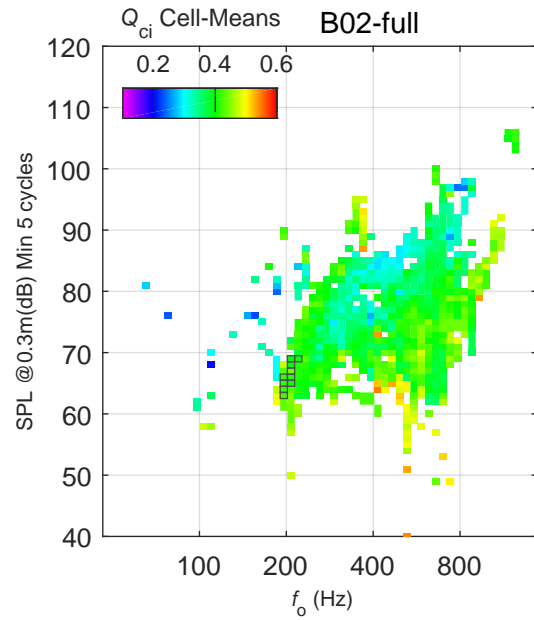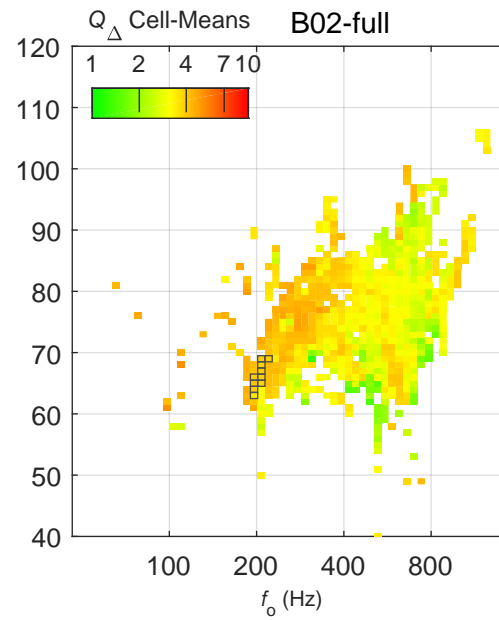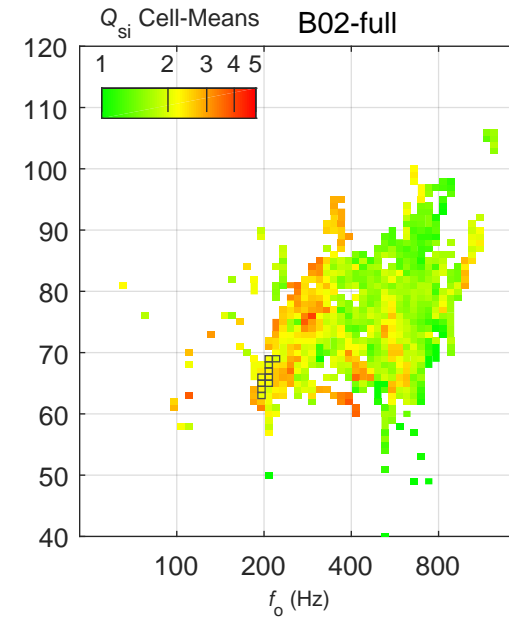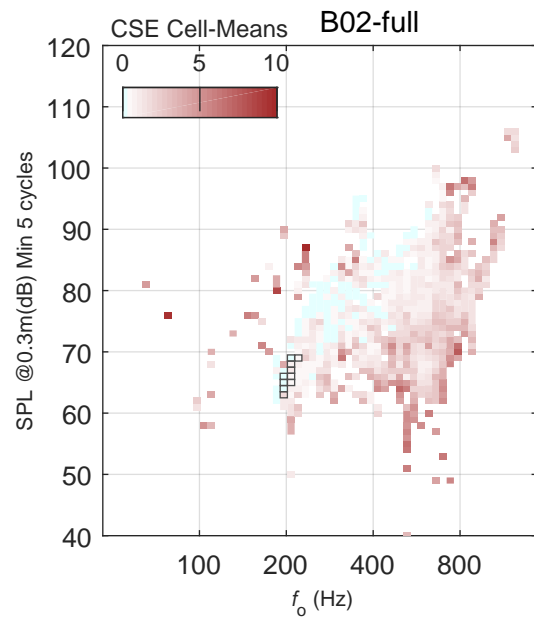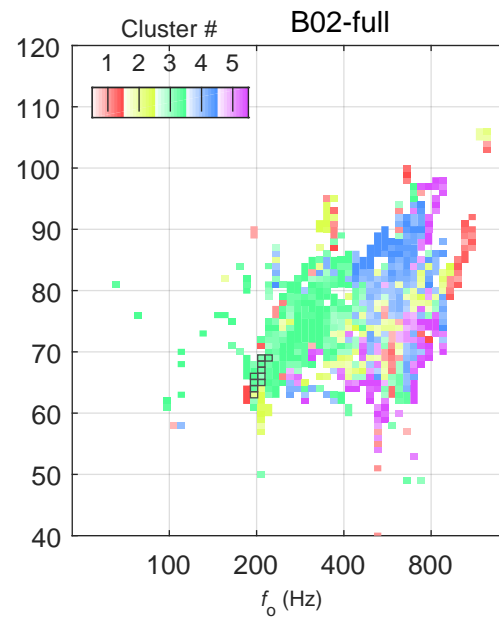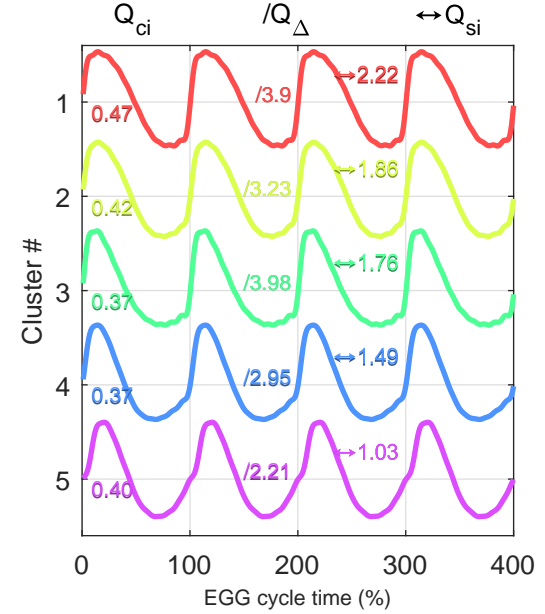

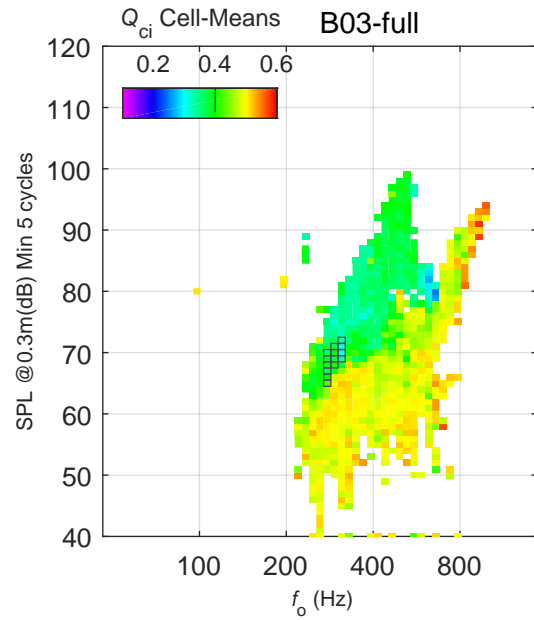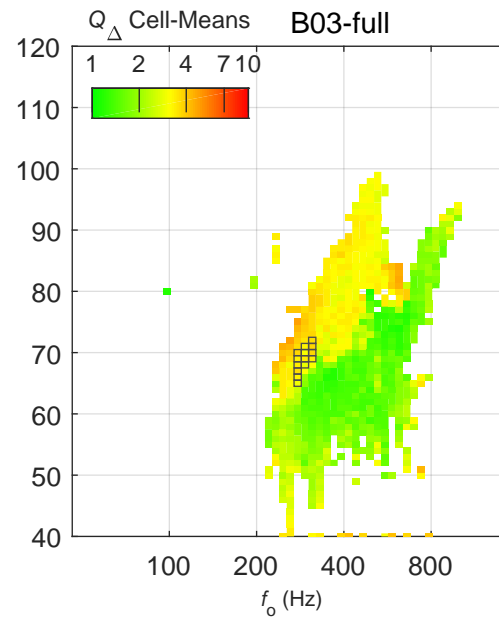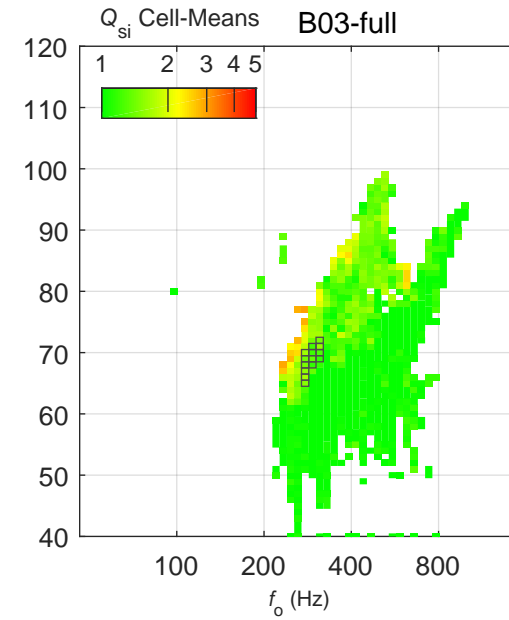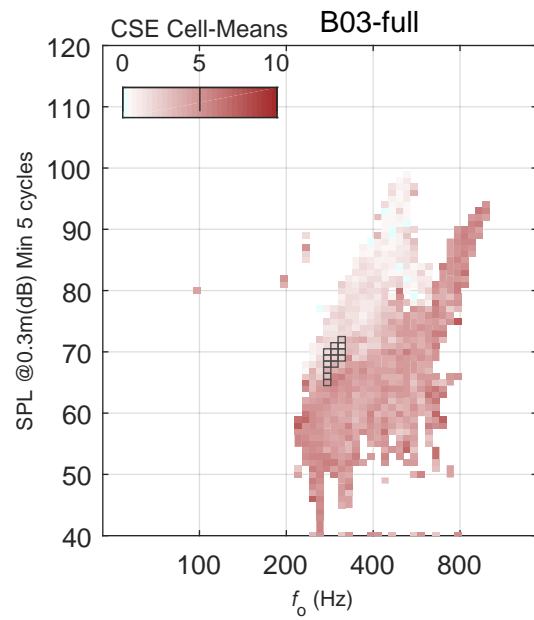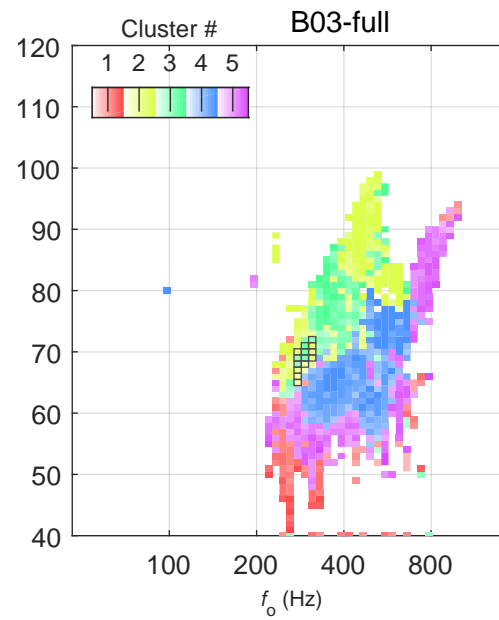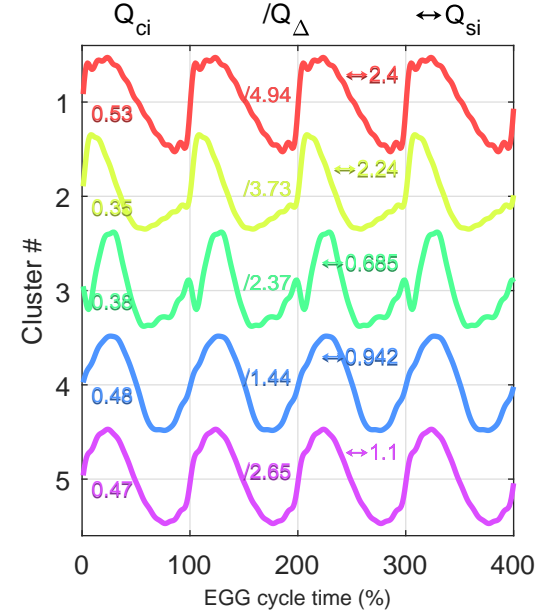

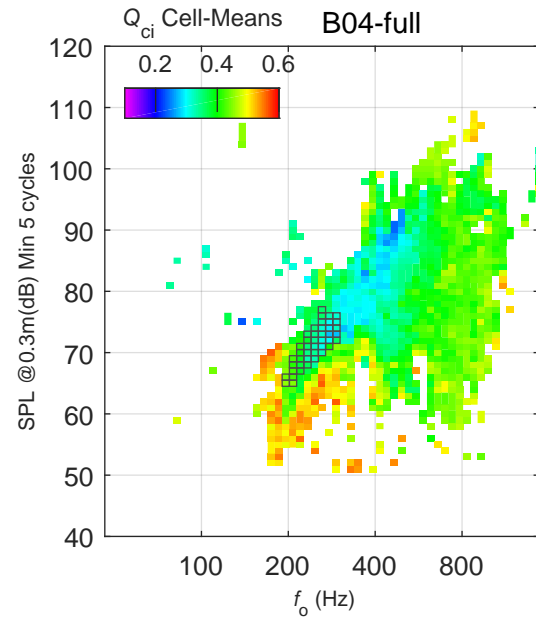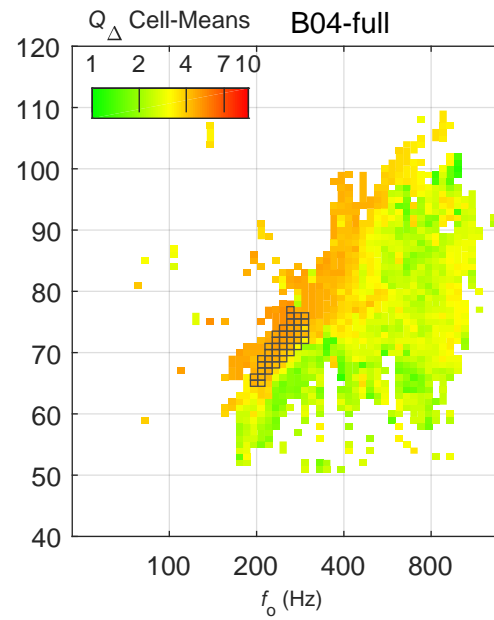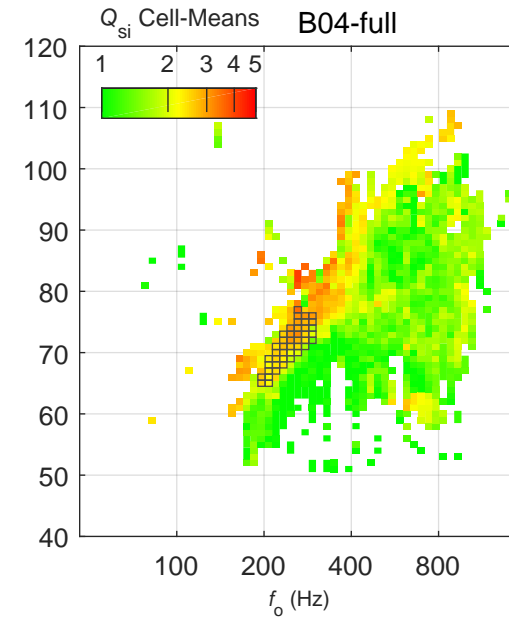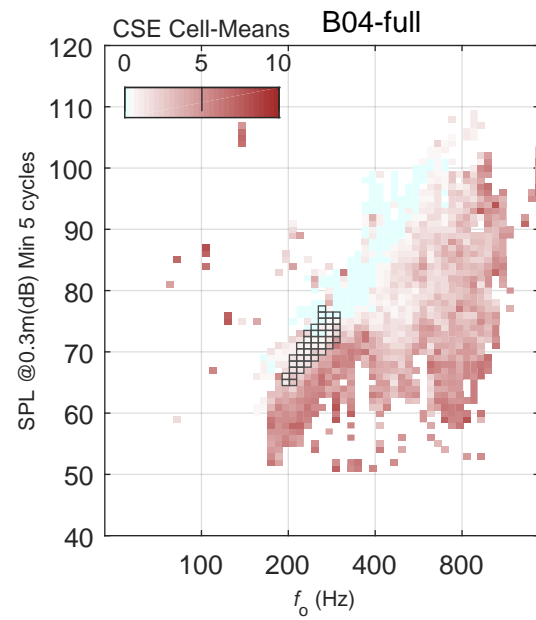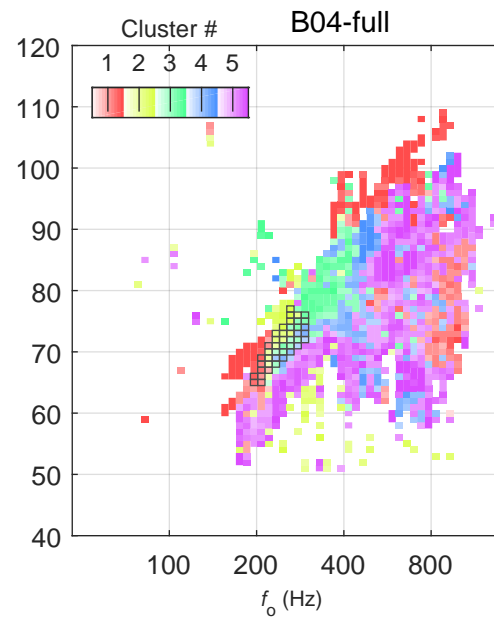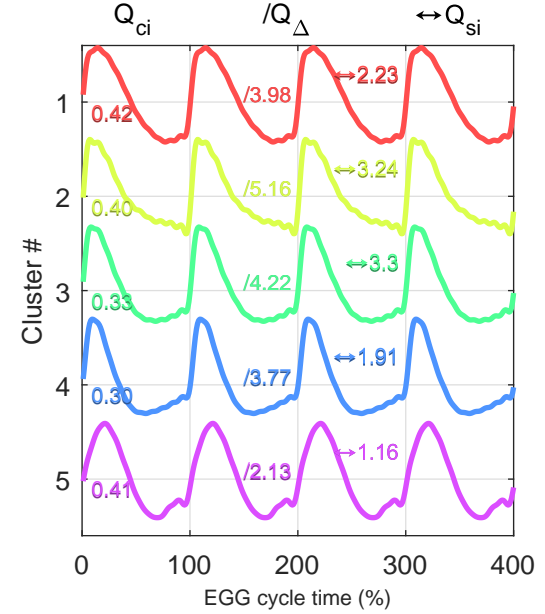

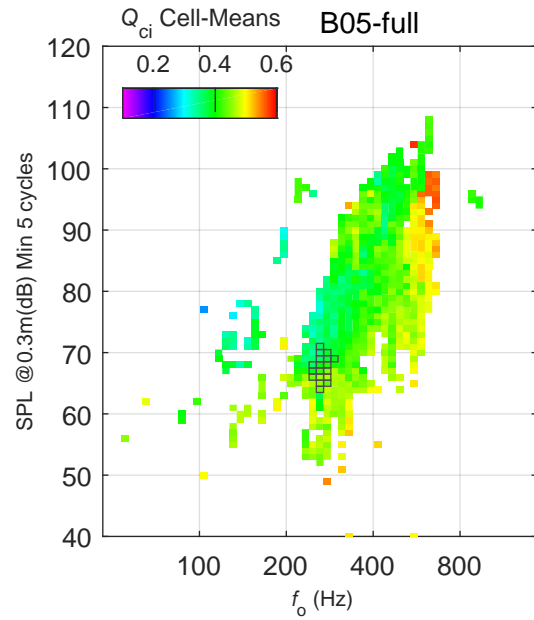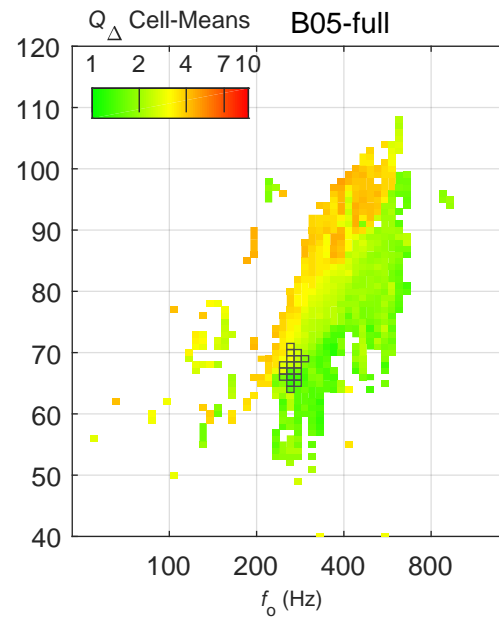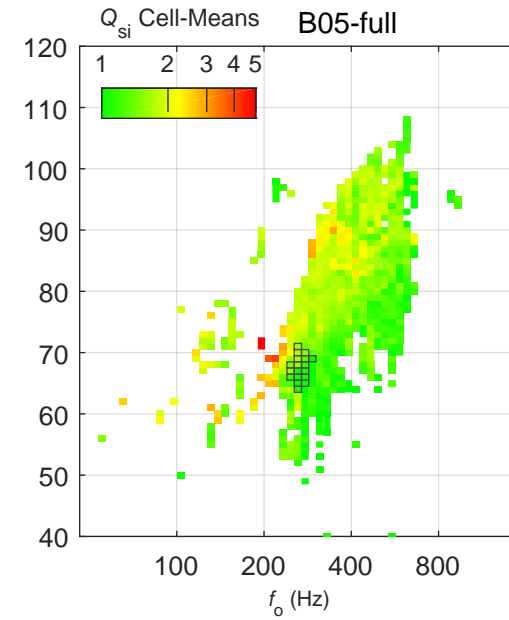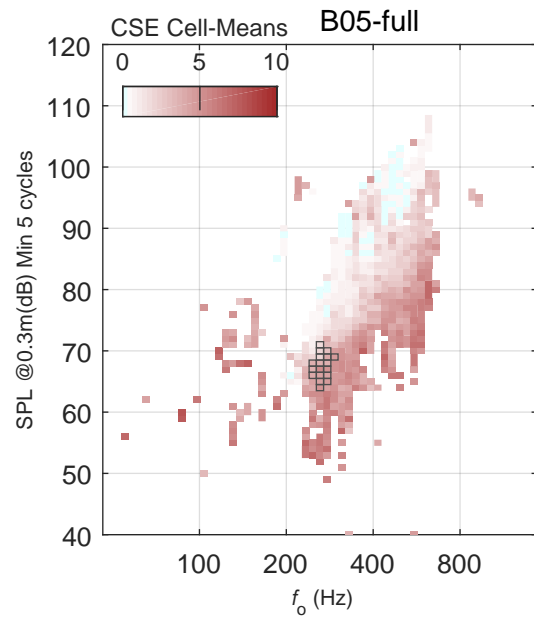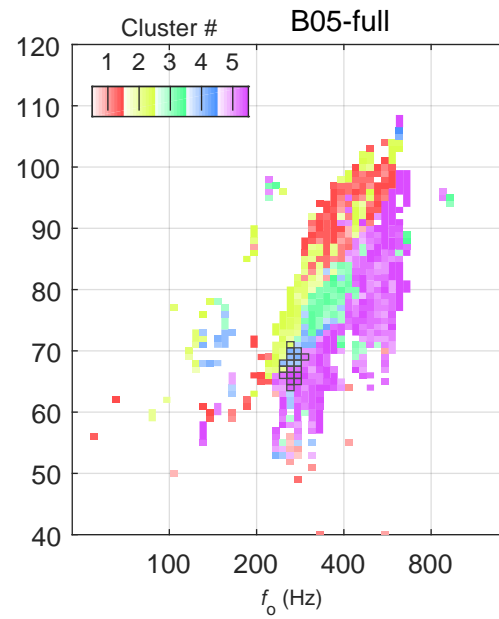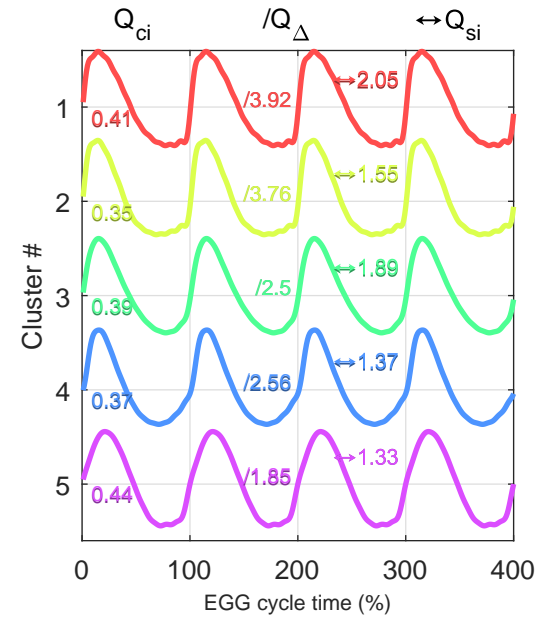

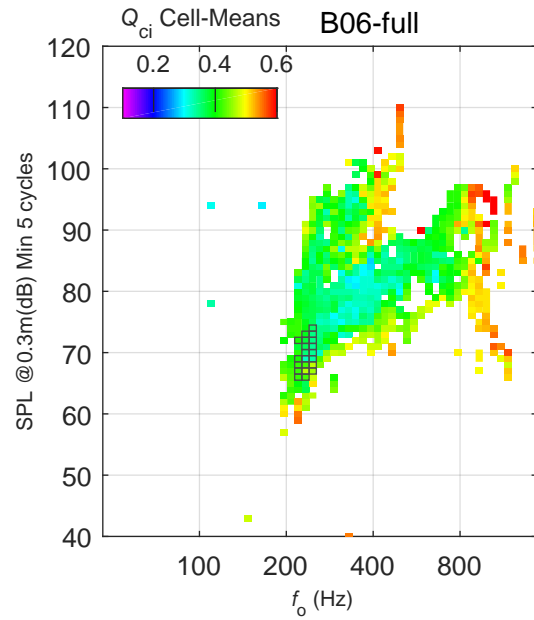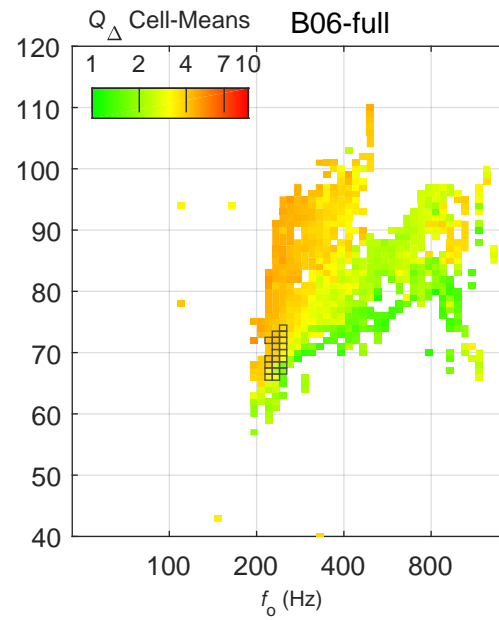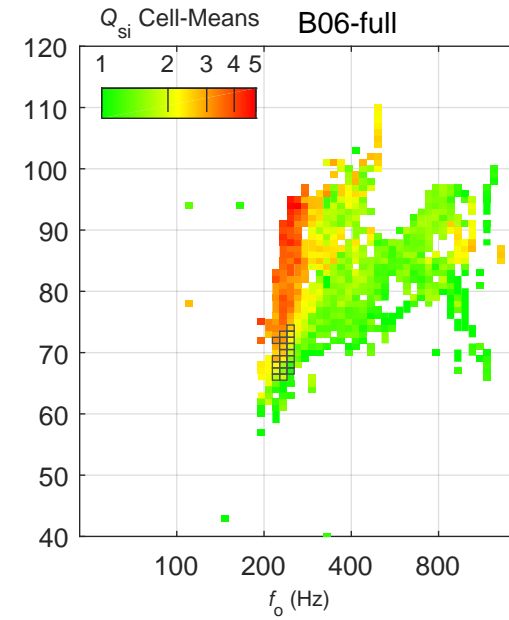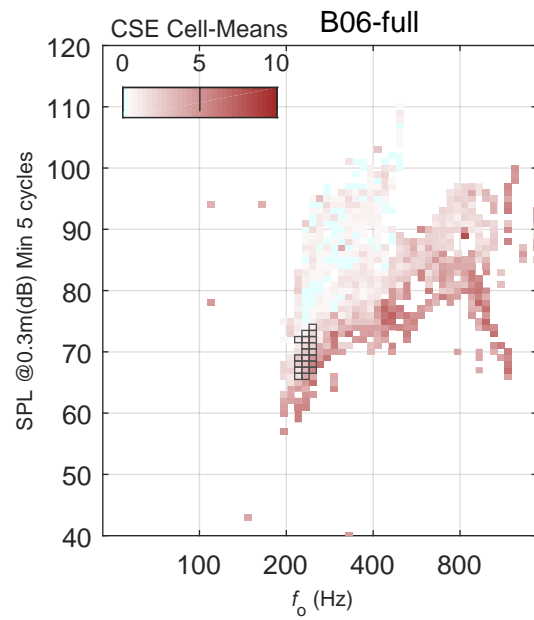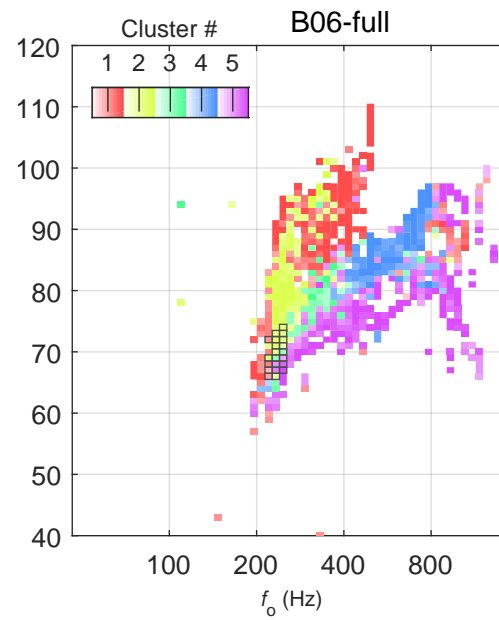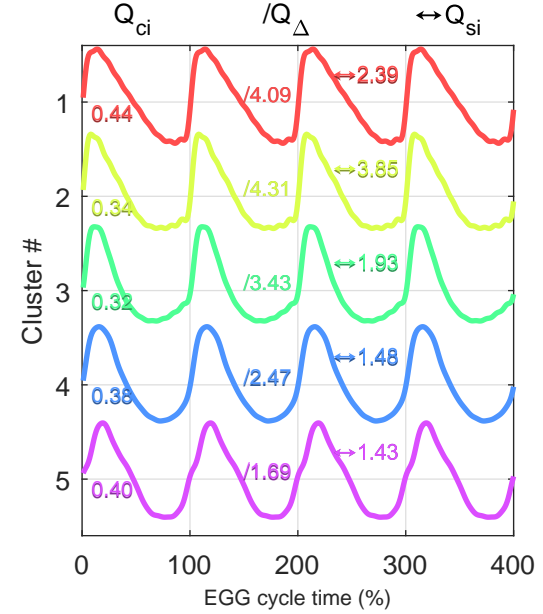



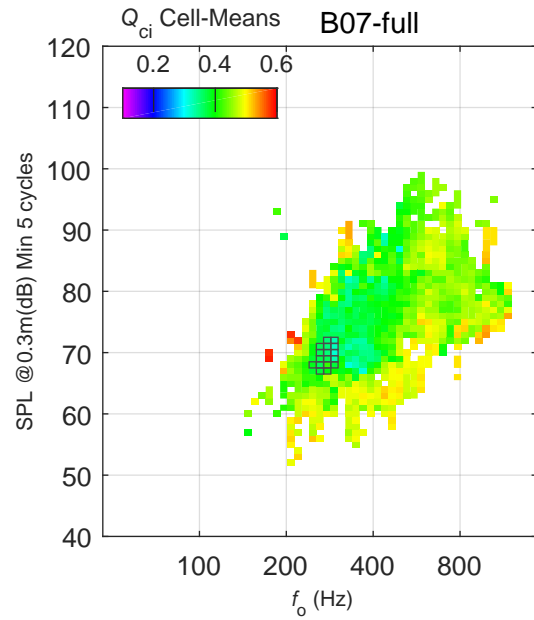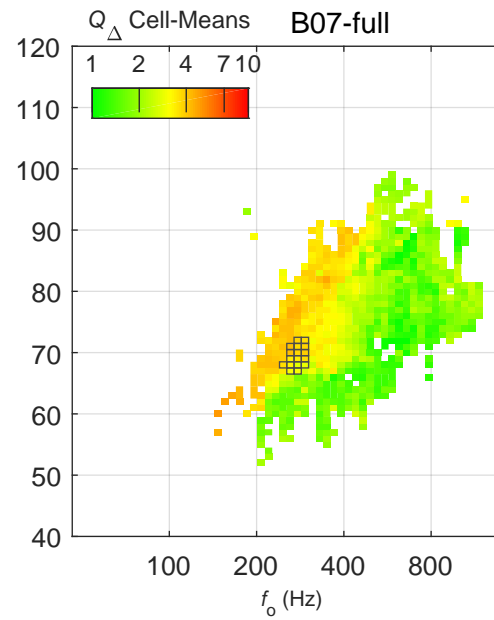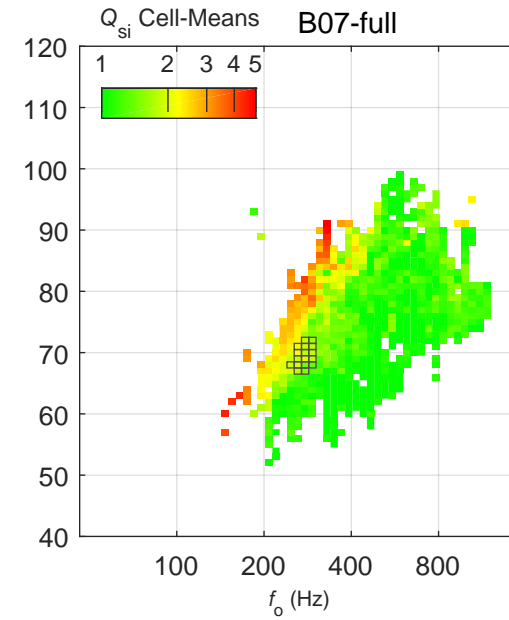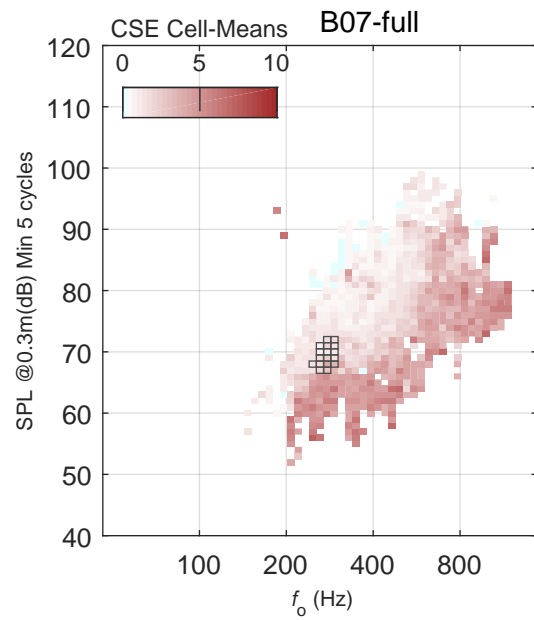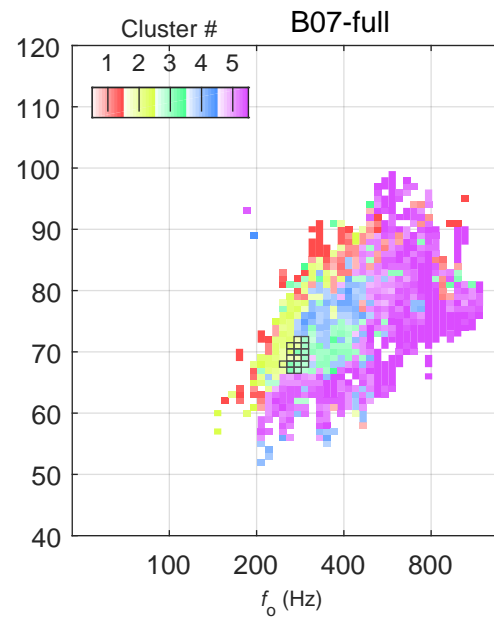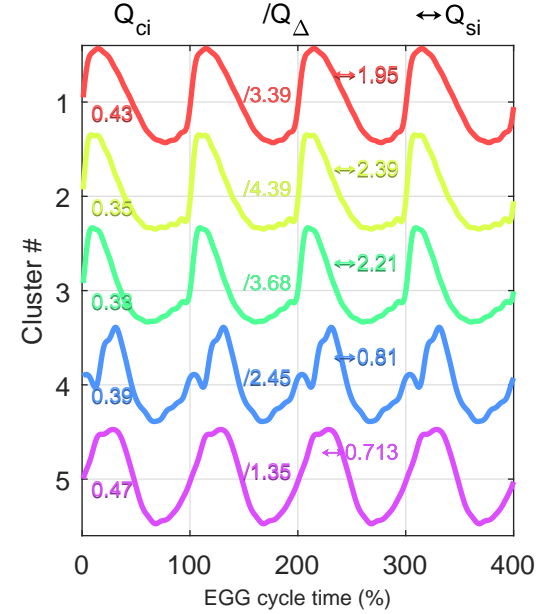

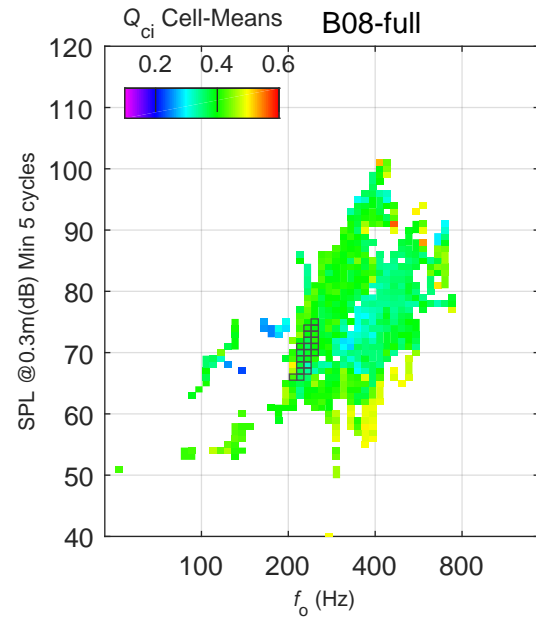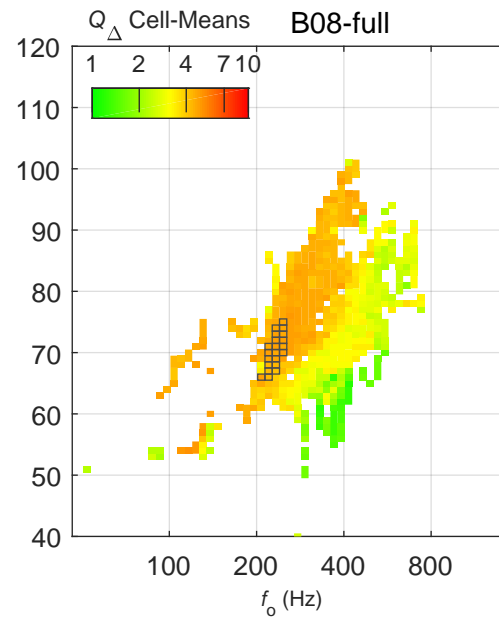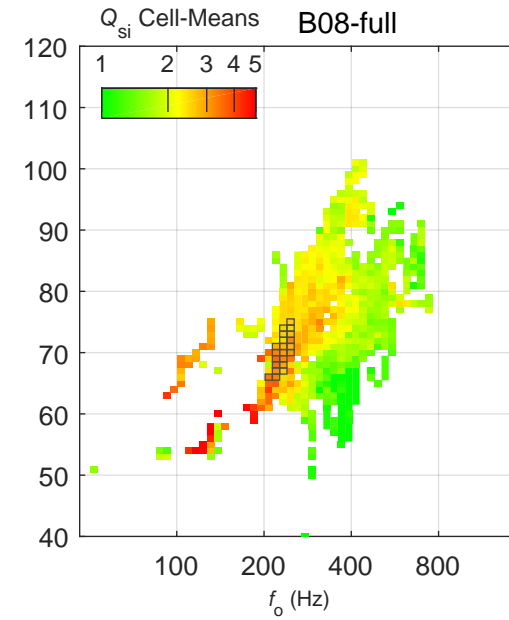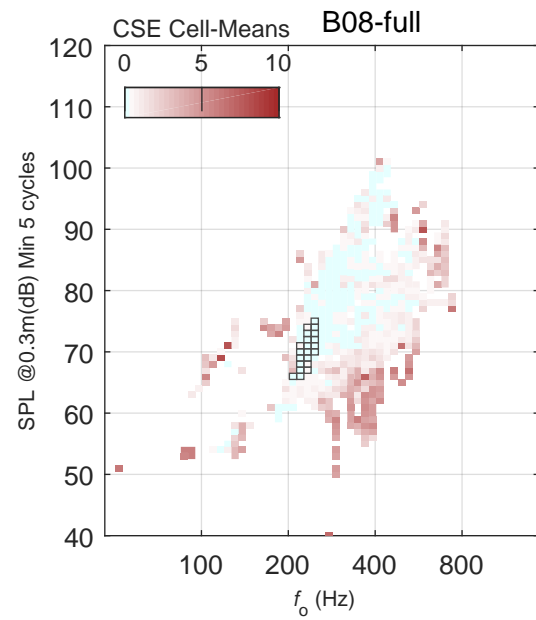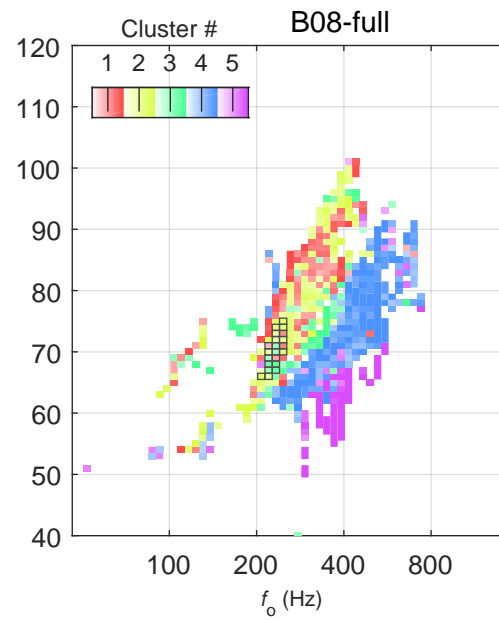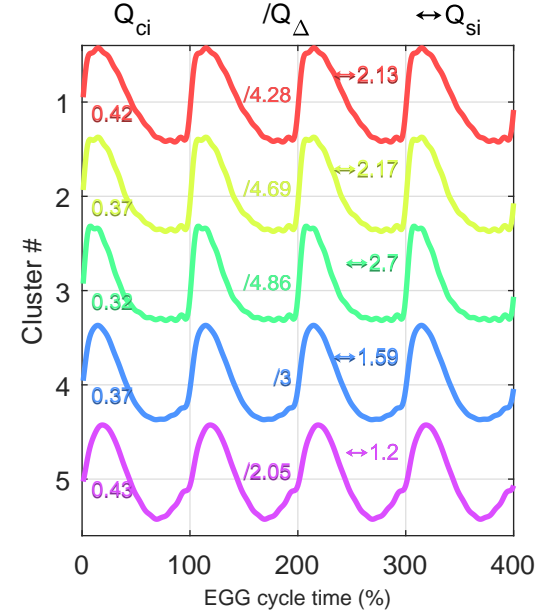

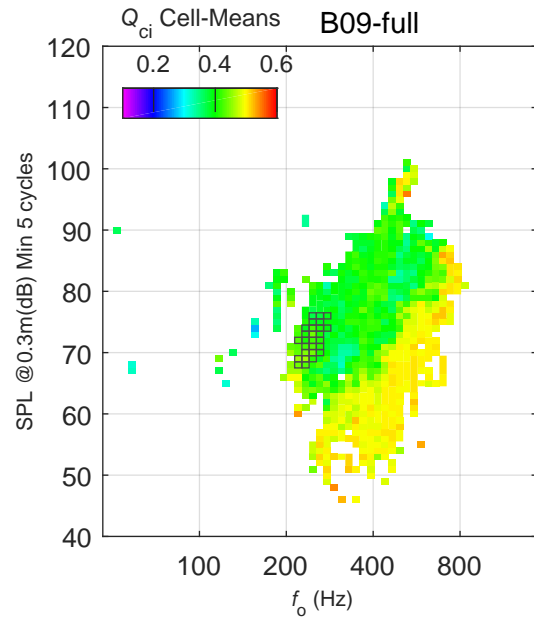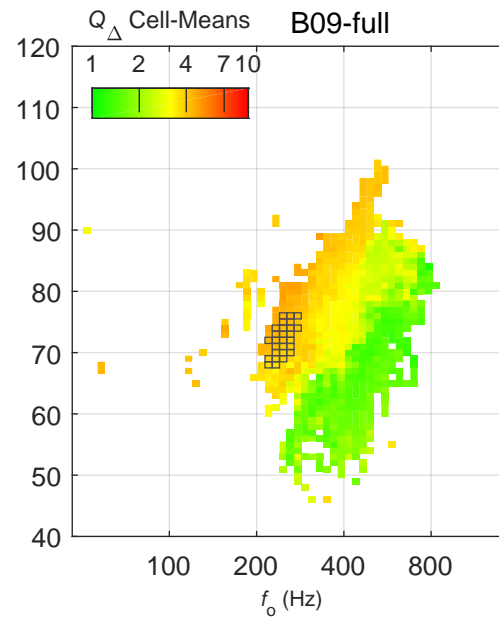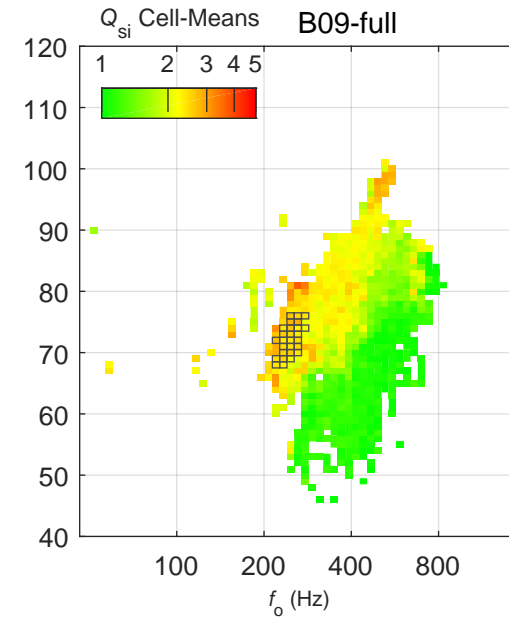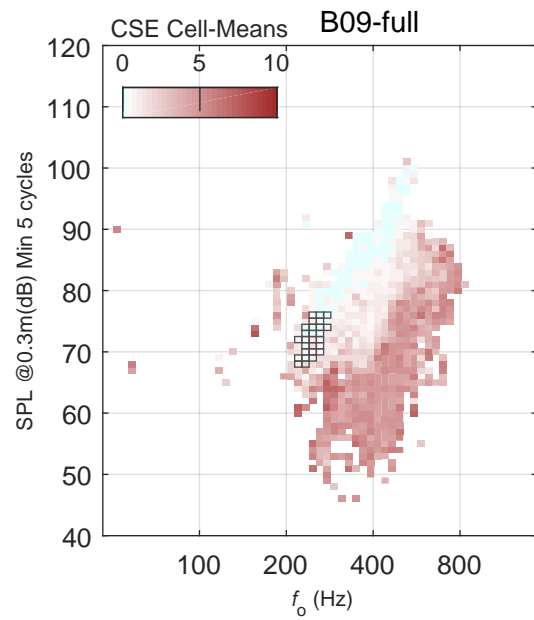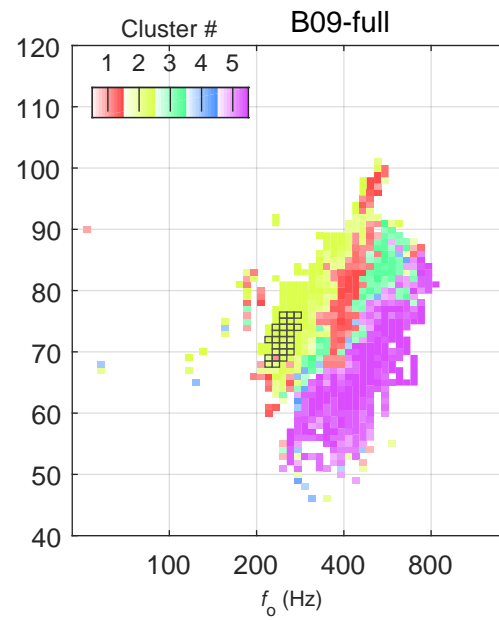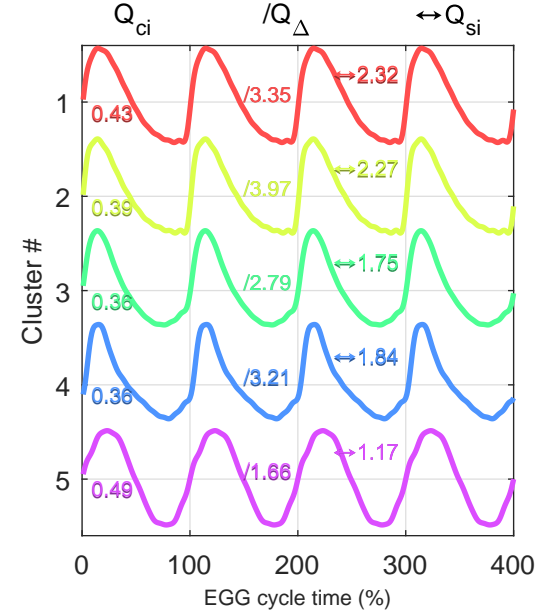

Supplement: Supplementary file 1 [file 1]
