# Supplementary material
Source: publisher figshare collection journal article supplement (https://asha.figshare.com/articles/dataset/_/15057345)

### **Supplemental Material S1: Voice maps and electroglottographic wave shapes for all participants from the speech range profile task in the habitual range**

For adult participants (13 females, 13 males) the speech range profile (SRP) was obtained from three trials of the Rainbow Passage (Fairbanks 1960) whereas for children (11 girls, 9 boys) a picture of the 'Park Play scene' (Patel and Connaghan, 2014) was used. Each page shows the data for one participant.

A cell is included here if at least five electroglottography (EGG) cycles occurred in it. The maps show the Cell-Mean of the given EGG parameter on a color scale. The **black grid** shows the participant's gamma ( $\Gamma$ ) region, containing the top 50% of all the cell cycle counts in the map; this is taken to define the most representative core of the habitual speech range.

The six panels starting from top left to right (1-3) and bottom left to right (4-6) on each page show the following:

1. The Cell-Mean of the quotient of contact by integration  $Q_{ci}$ , a measure of the relative amount of contacting.
2. The Cell-Mean of the normalized peak dEGG amplitude quotient  $Q_{\Delta}$ , a measure of the maximum rate of change in contact area over a cycle. Its minimum is 1, corresponding to a sinusoidal EGG.
3. The Cell-Mean of the quotient of speed by integration  $Q_{si}$ , a measure of the asymmetry of the contact phase. The value 1 represents a symmetrical contact phase,  $>1$  means the pulse is skewed to the left.
4. The Cell-Mean of the cycle-rate sample entropy CSE, a measure of the disorder in successive EGG wave shapes. The pale cyan color signifies that all cycles in the cell received the value zero; they were below the threshold of the Sample Entropy computation. This indicates very stable phonation.
5. The distribution of five EGG wave shapes as obtained by 5-way clustering of this participant's productions.
6. The EGG wave shapes corresponding to those five clusters, each a concatenation of 4 identical pulses for visual clarity. The EGG parameters are annotated on each waveshape as  $Q_{ci}$ ,  $/Q_{\Delta}$  where  $/$  = slope and  $\leftrightarrow Q_{si}$  where  $\leftrightarrow$  = asymmetry.

The dependent variables  $Q_{ci-M}$ ,  $Q_{\Delta-M}$ ,  $Q_{si-M}$  and CSE-M for the connected speech task are the means within the  $\Gamma$  region of the respective Cell-Means listed above. Similarly, the dependent variables  $Q_{ci-SD}$ ,  $Q_{\Delta-SD}$  and  $Q_{si-SD}$  for the connected speech task are the means of the respective Cell-SDs (not shown here) of the SRP data within the  $\Gamma$  region.

The scale tick values show how the Cell-Mean of the parameter is mapped to a color. For the  $Q_{\Delta}$  and  $Q_{si}$  parameters, the tick spacing is logarithmic only to provide visual contrast.

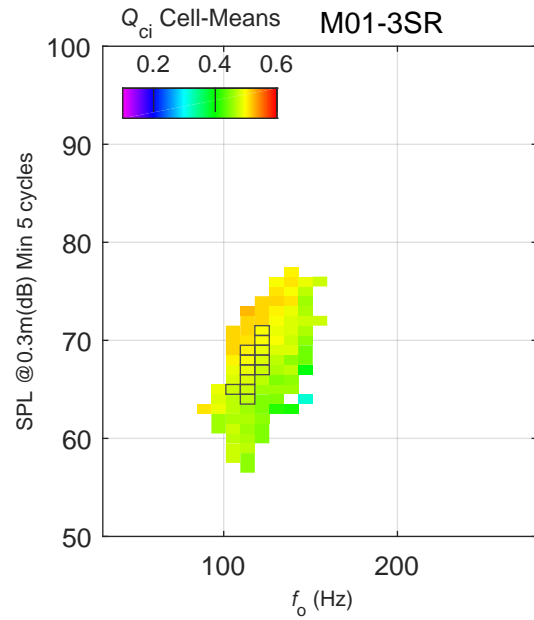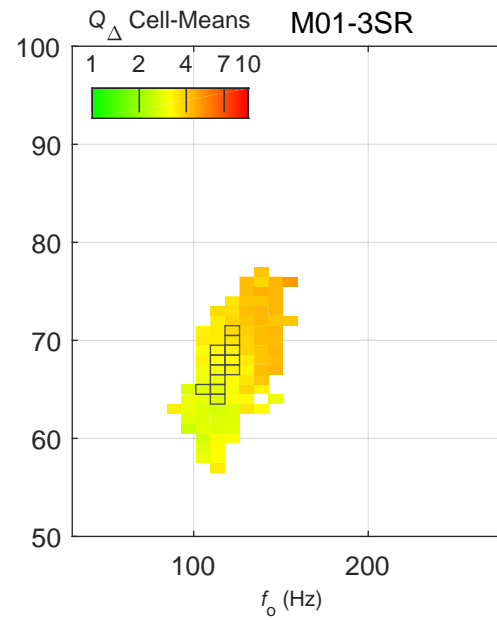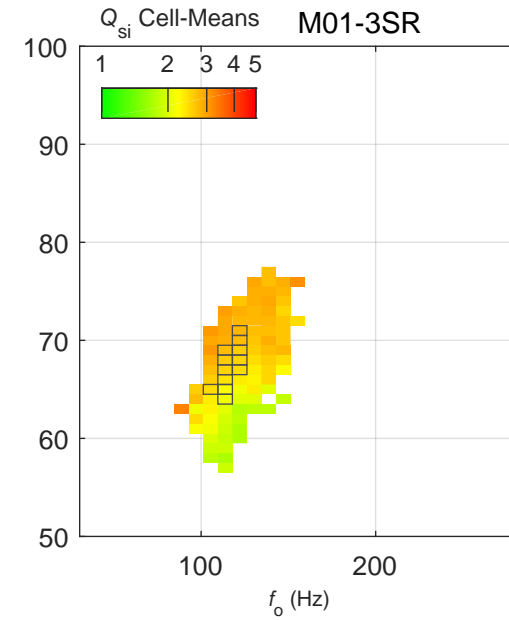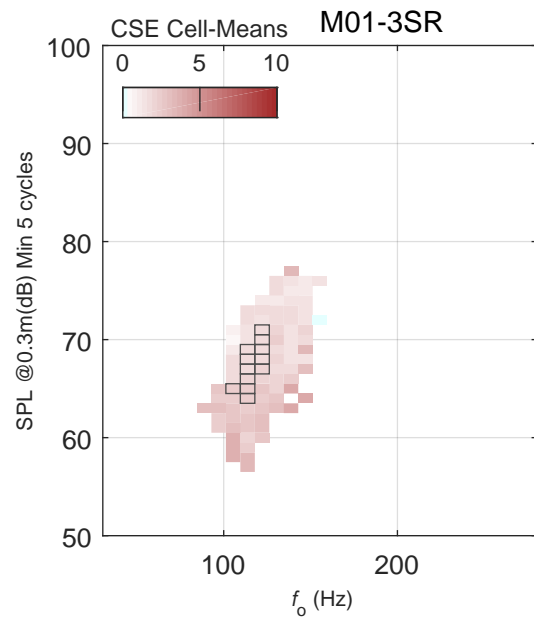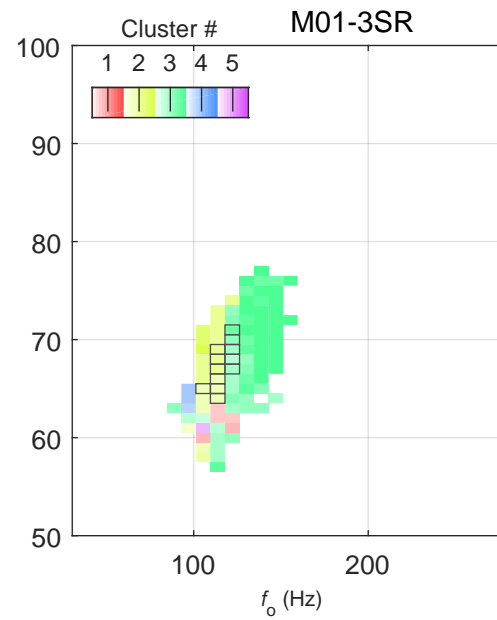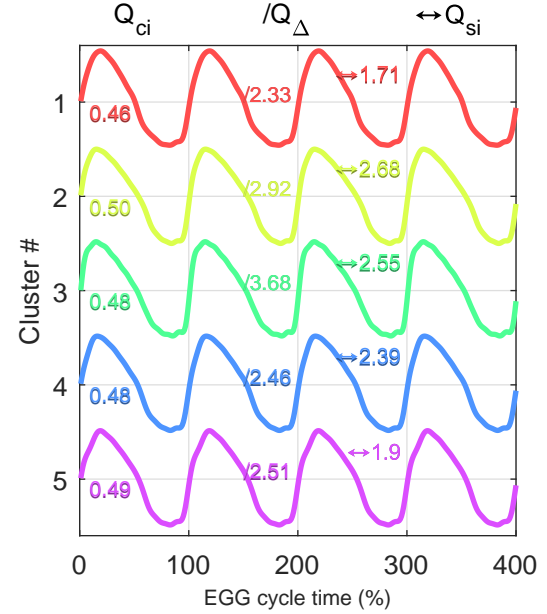

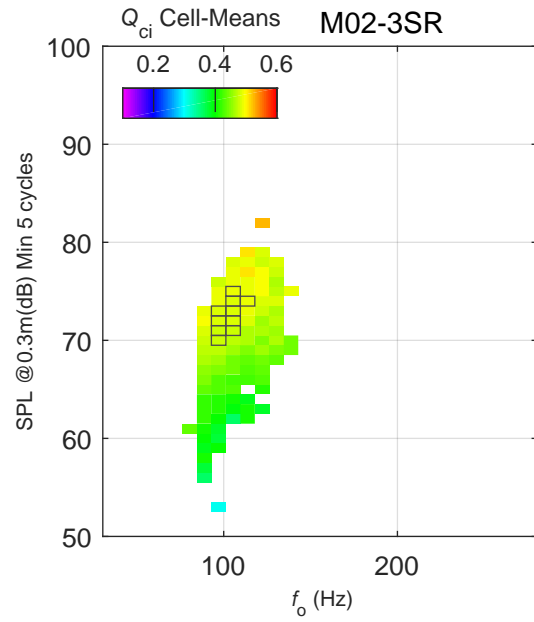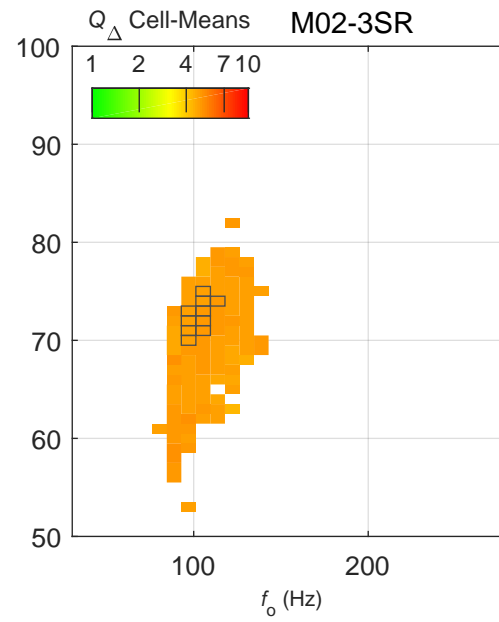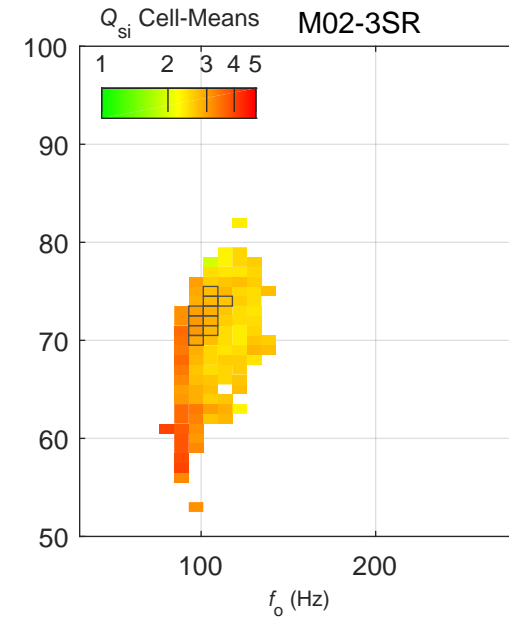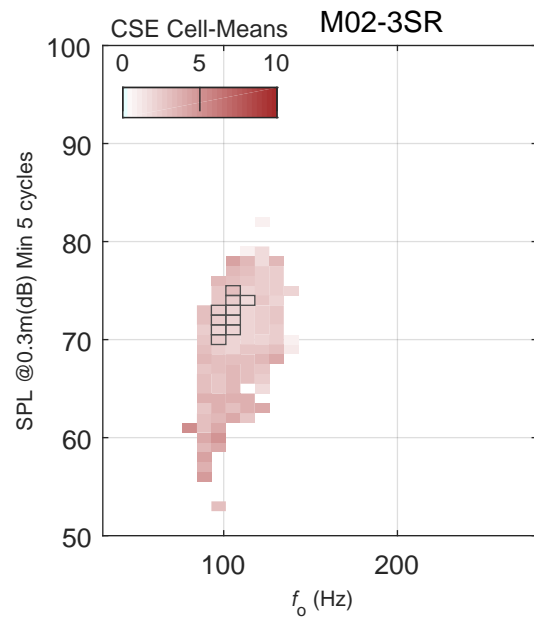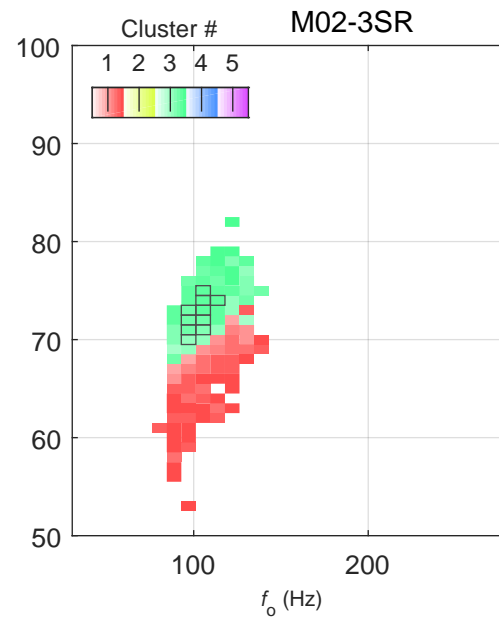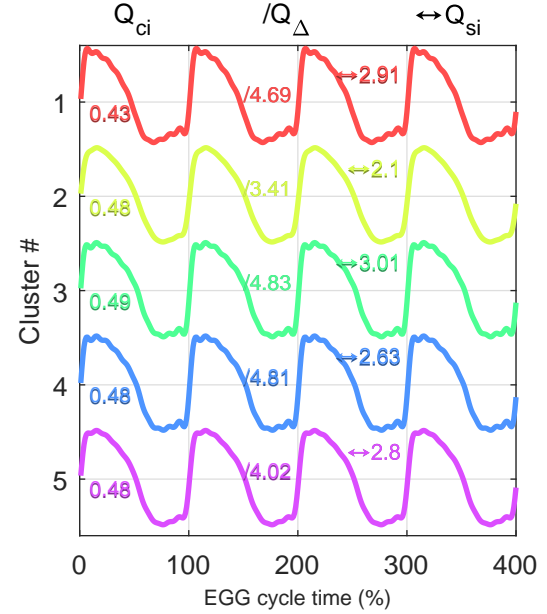

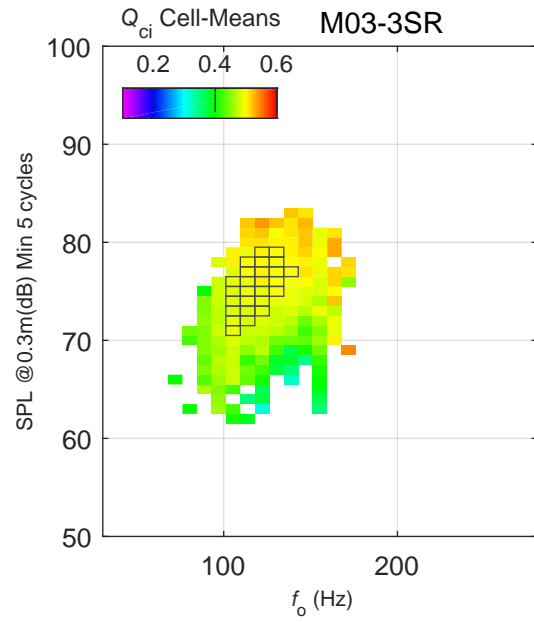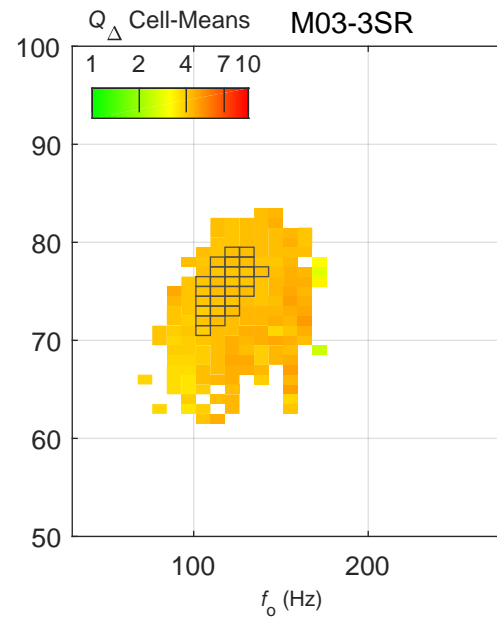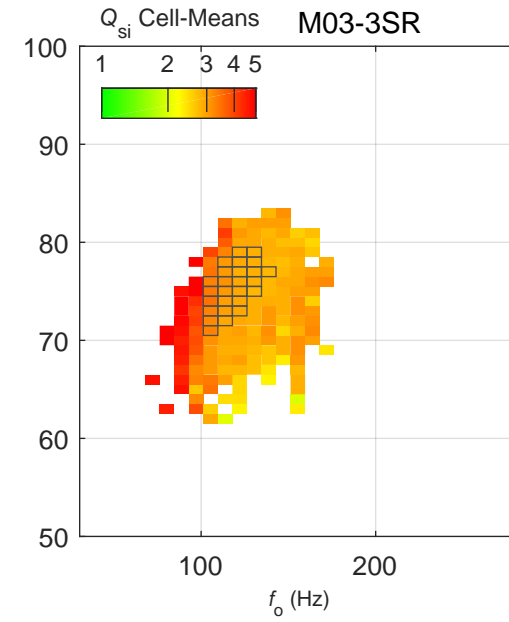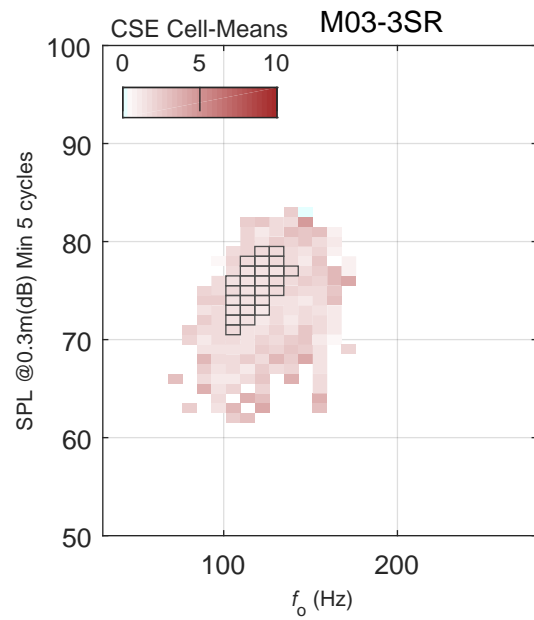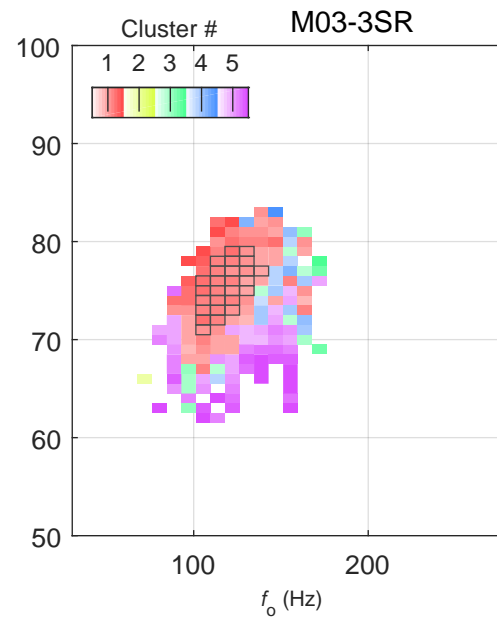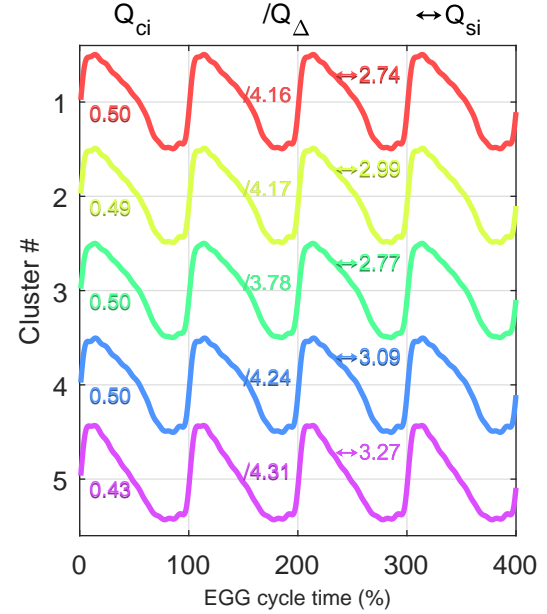

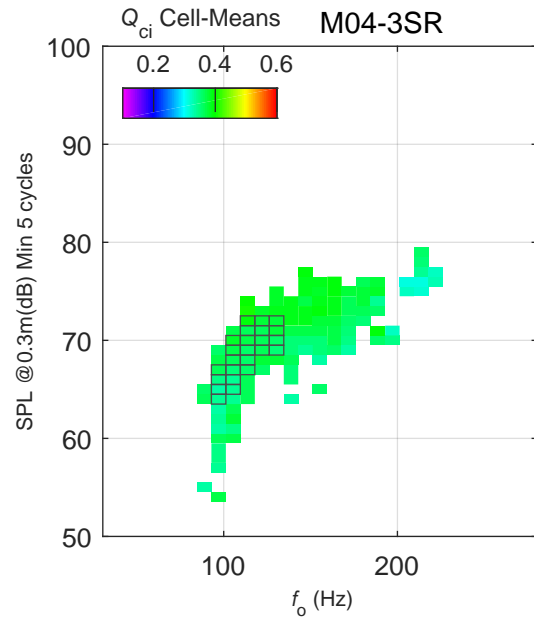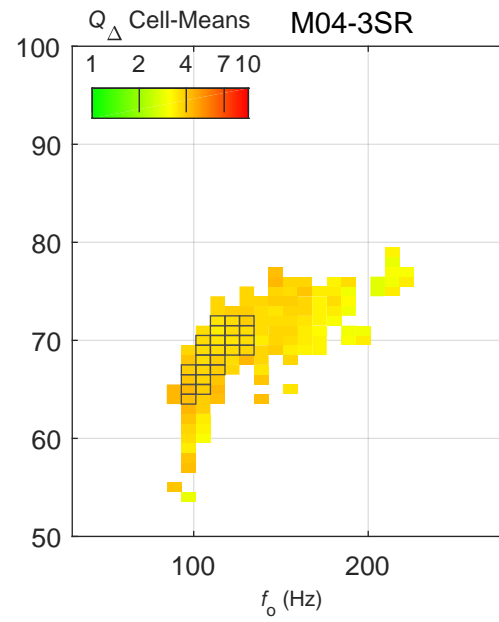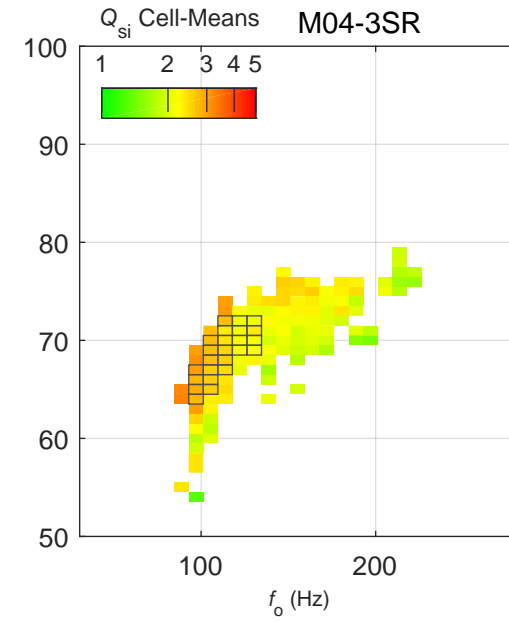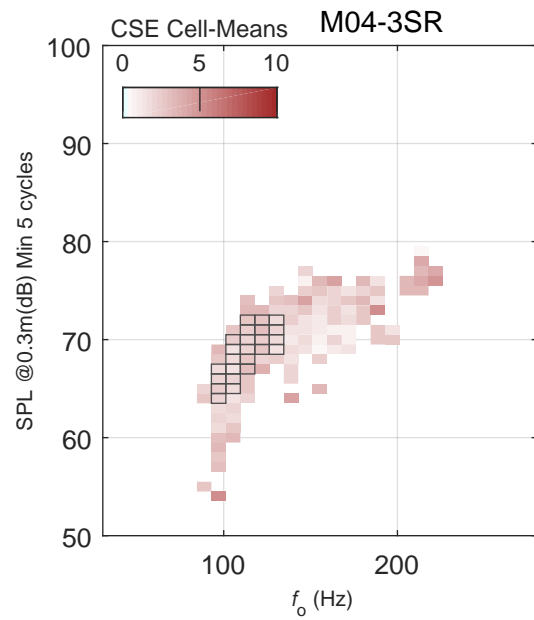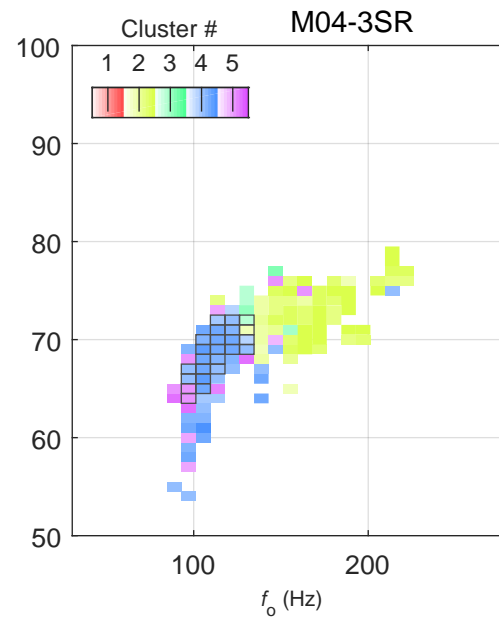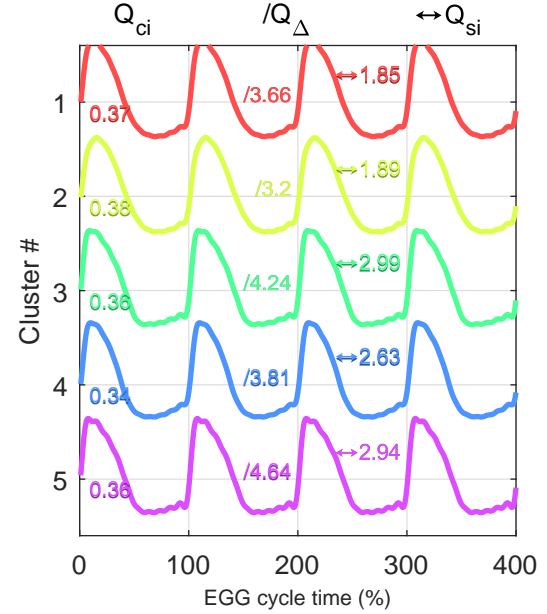

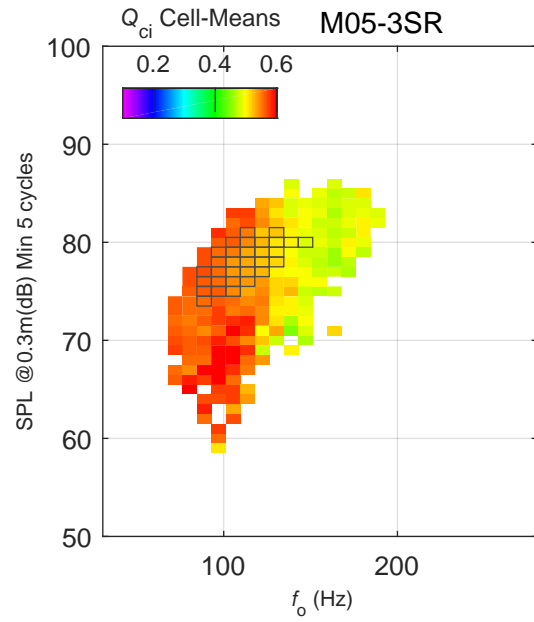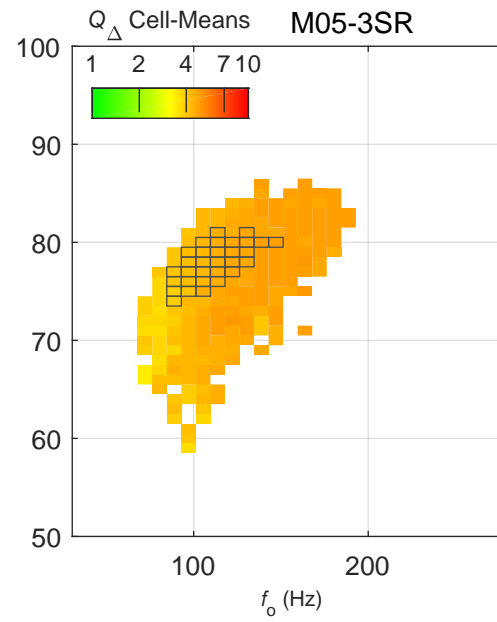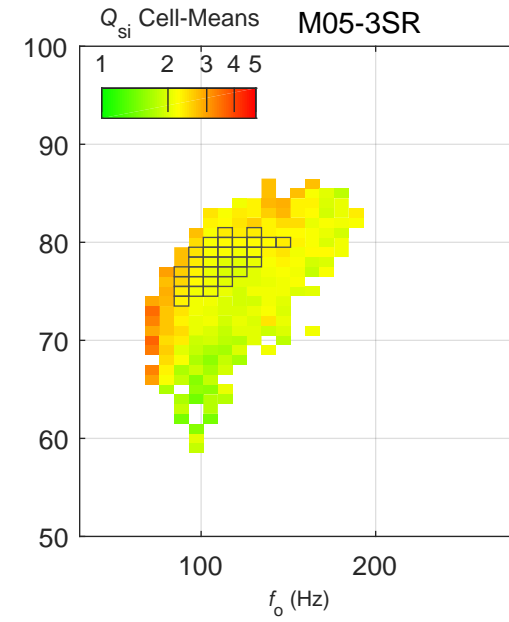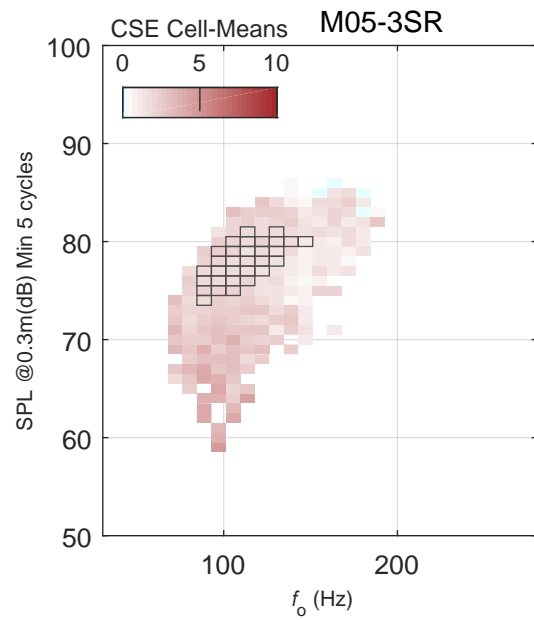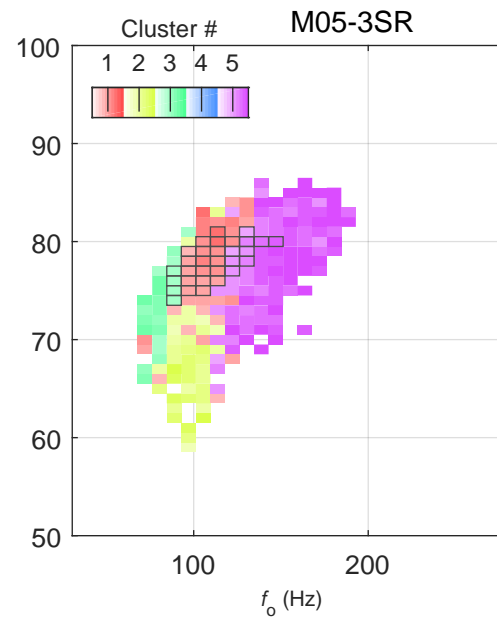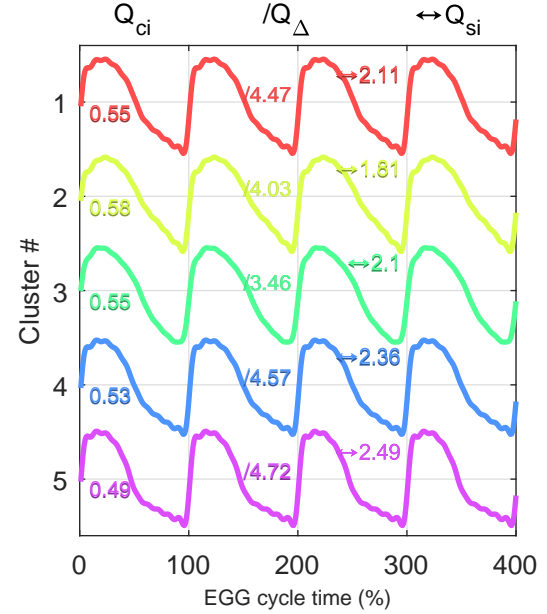

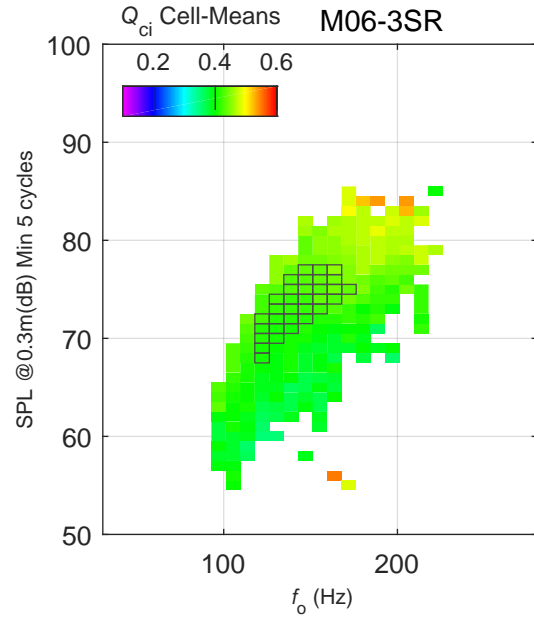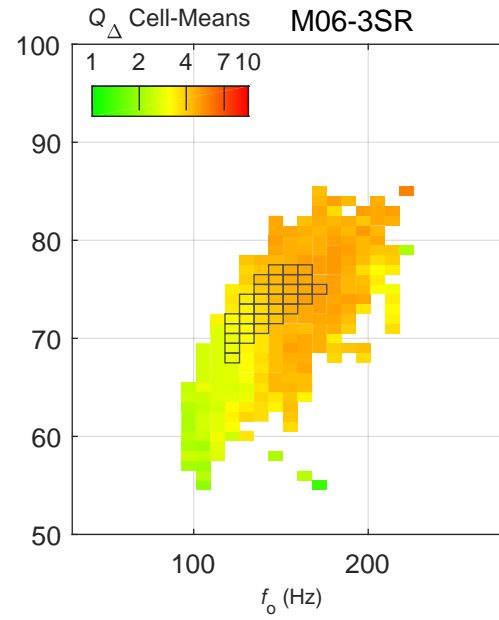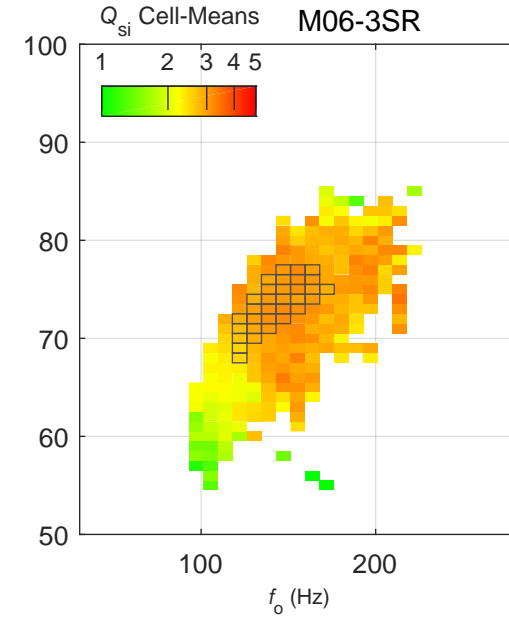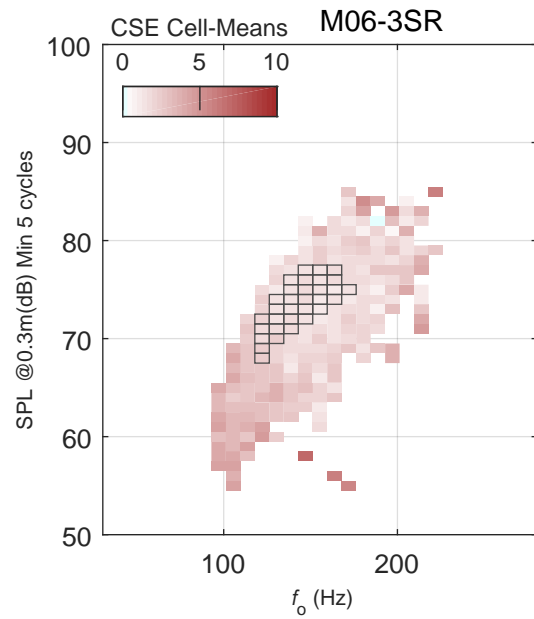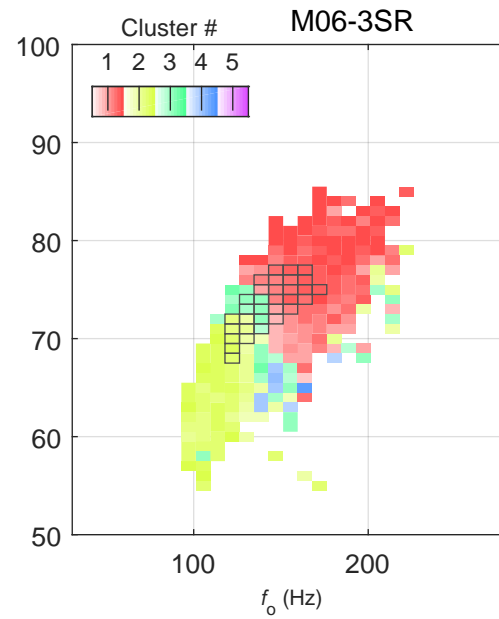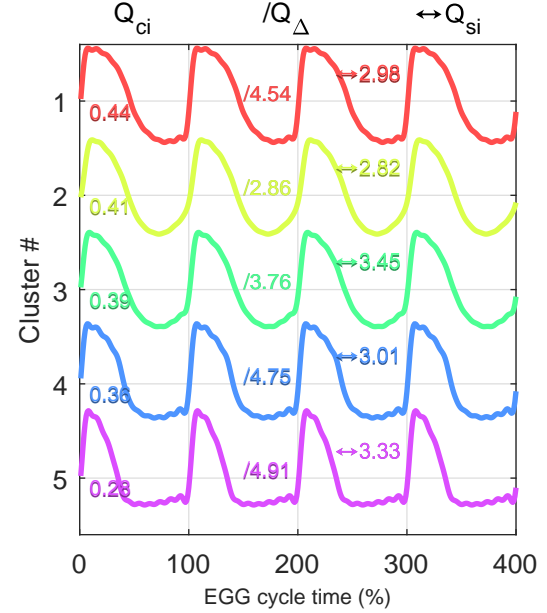

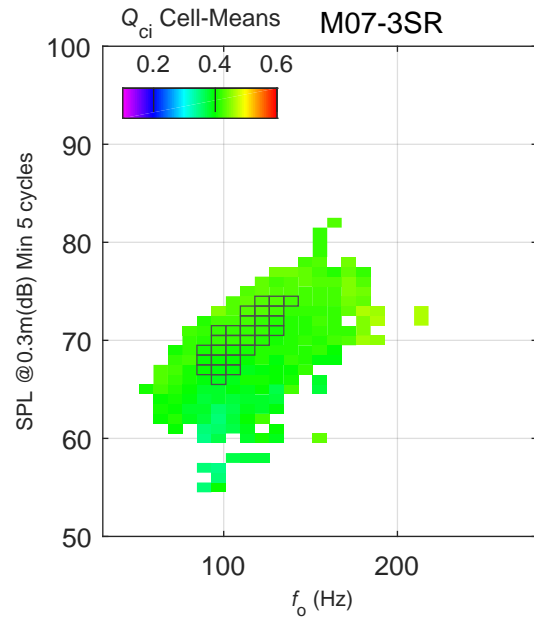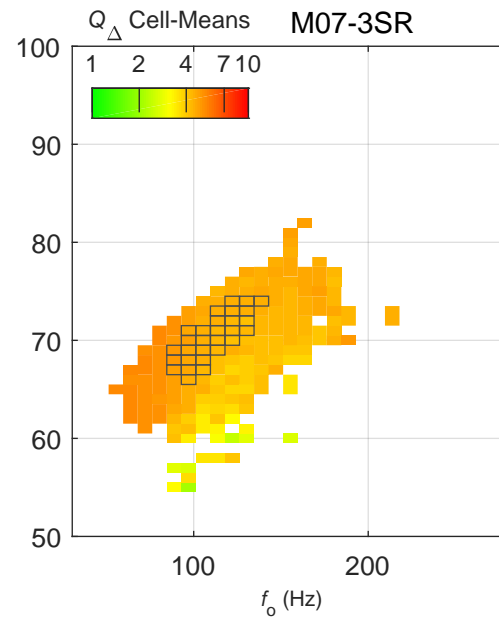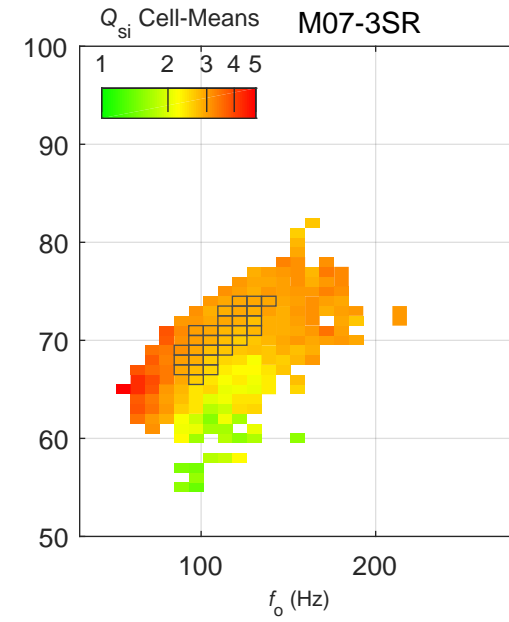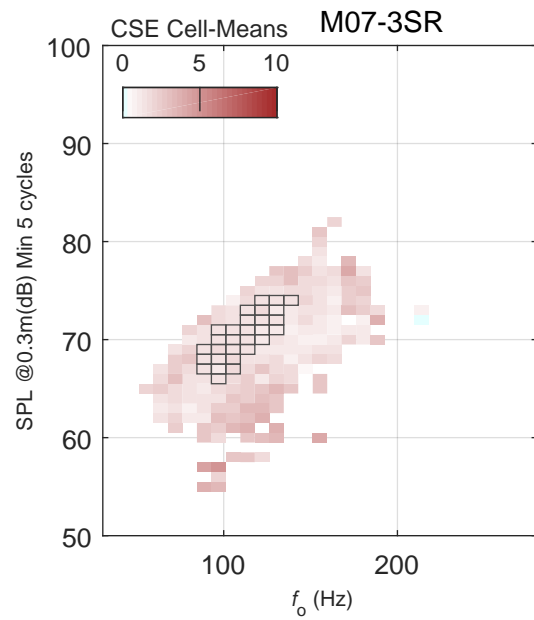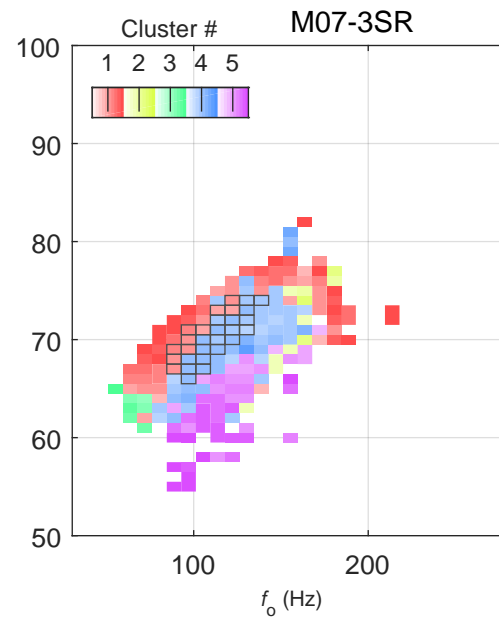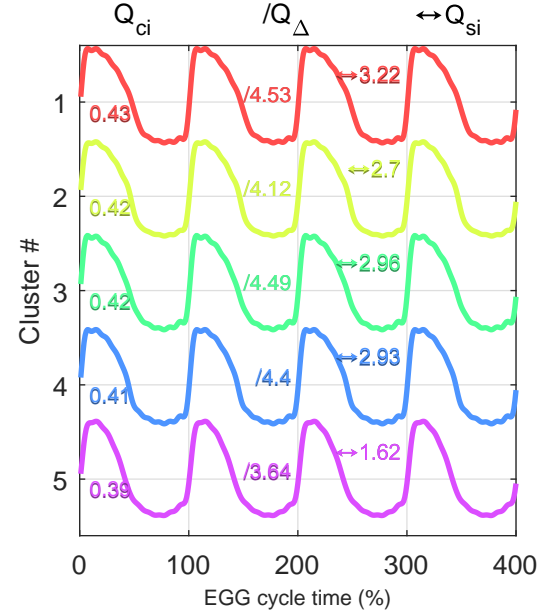



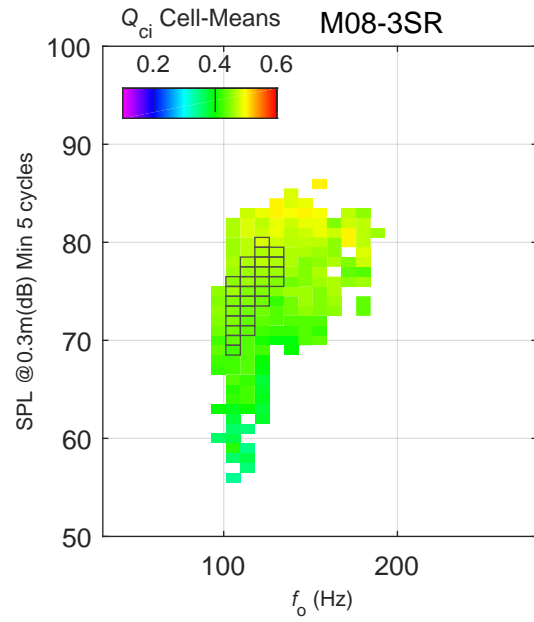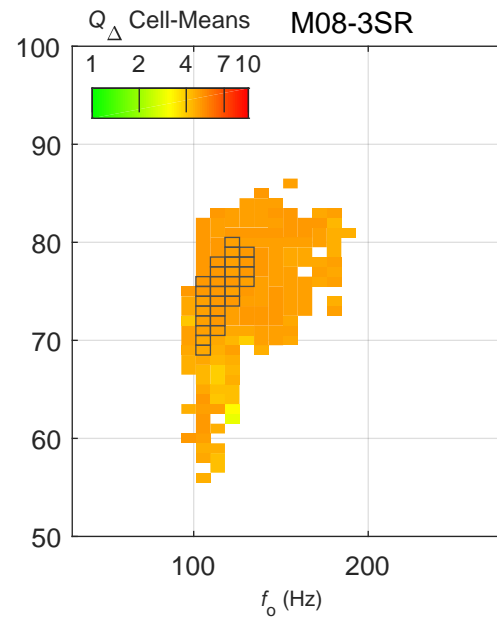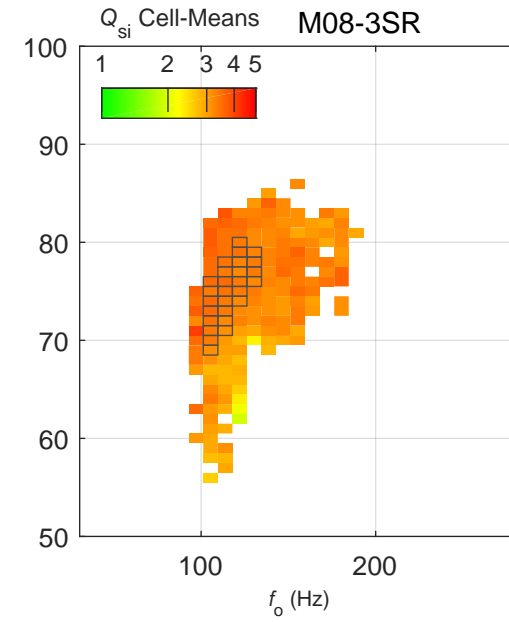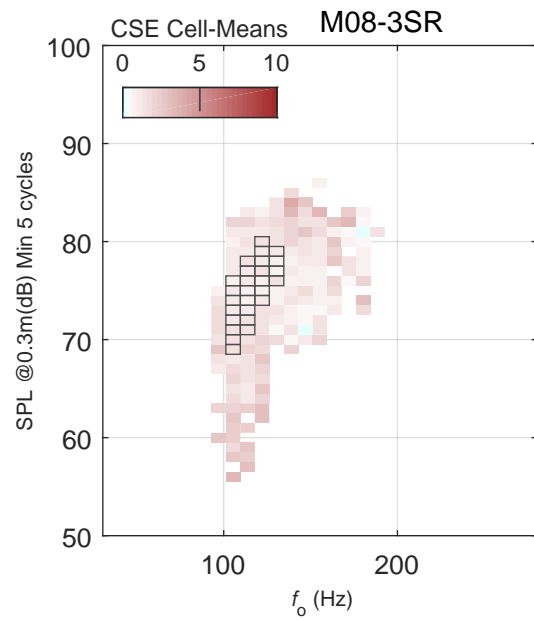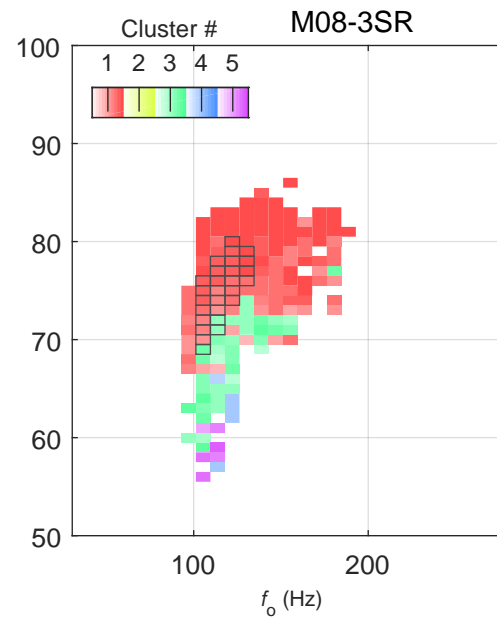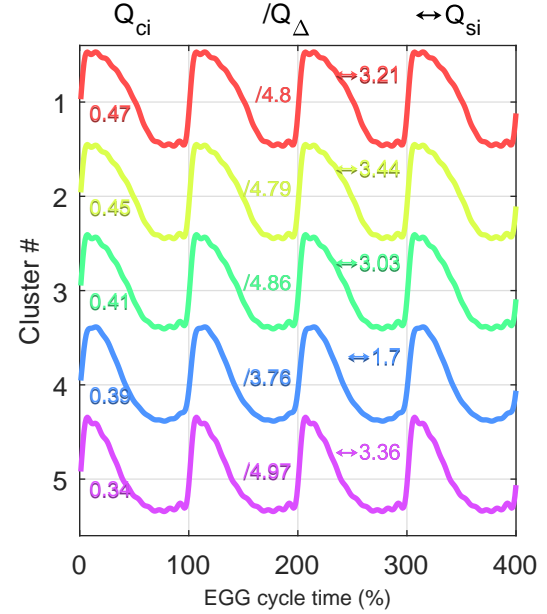

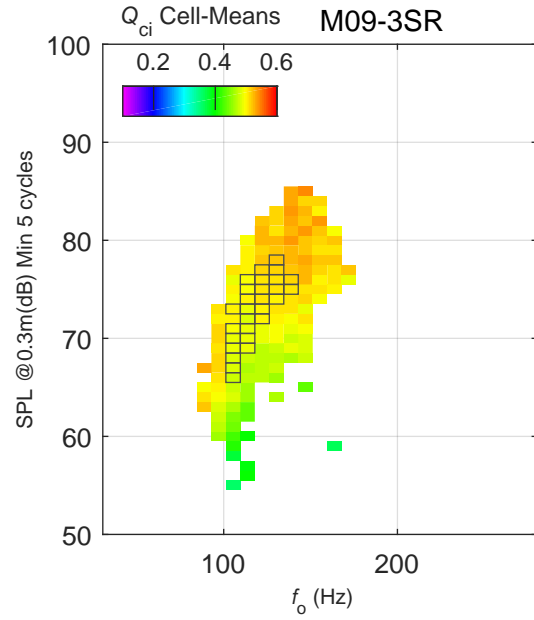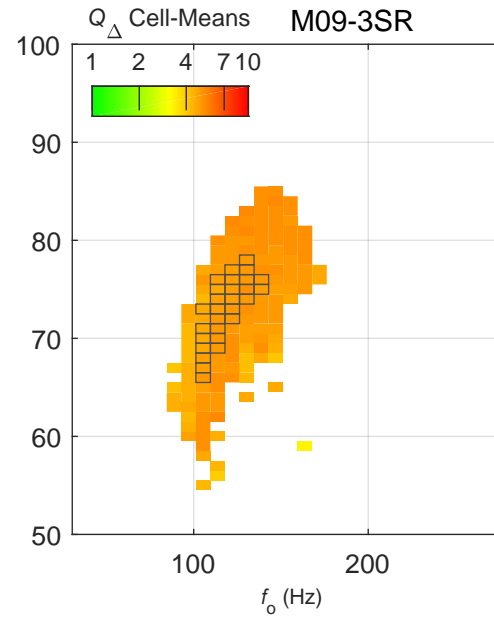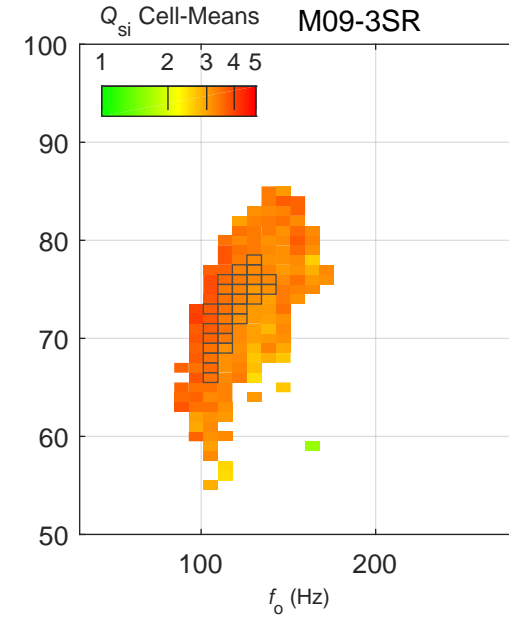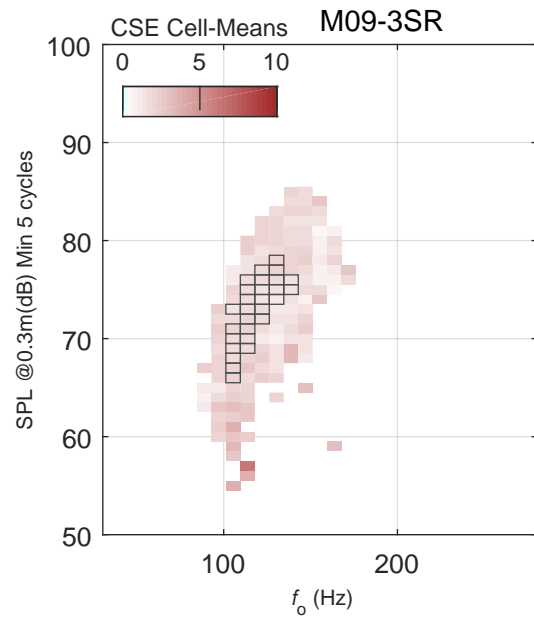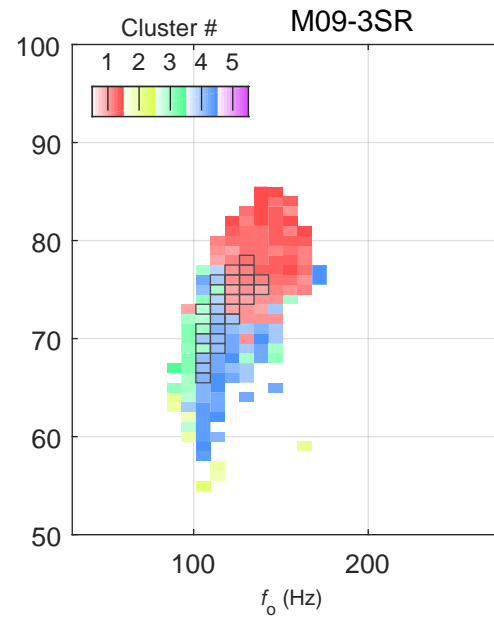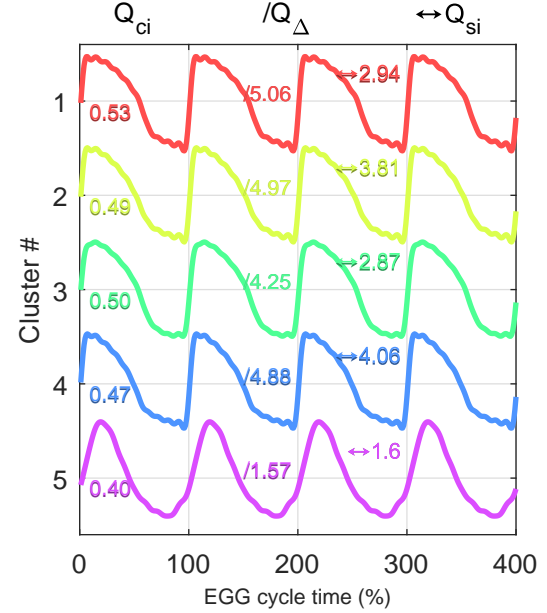

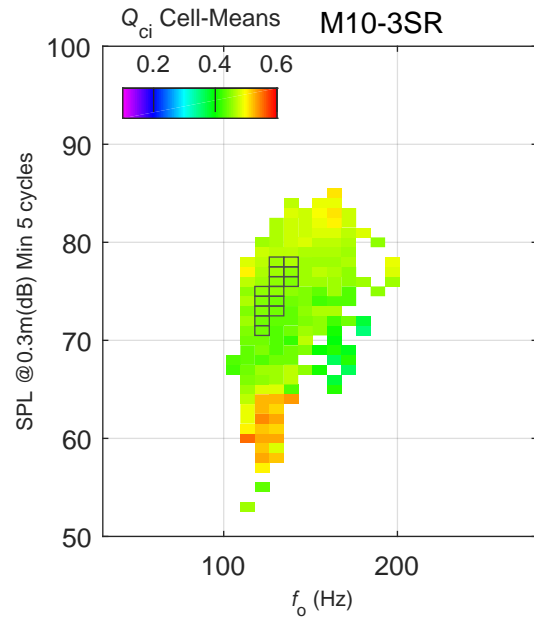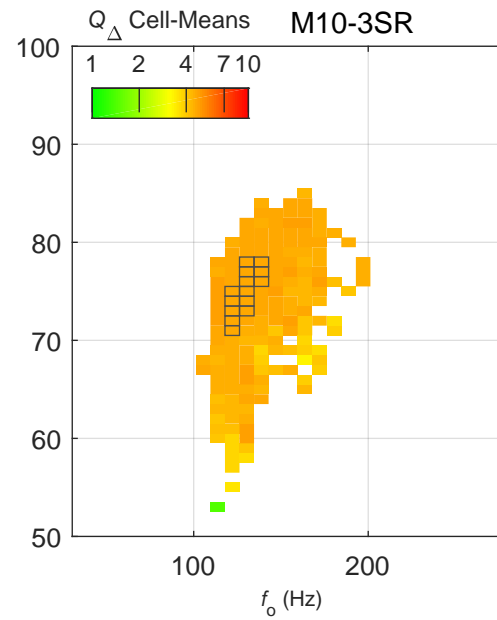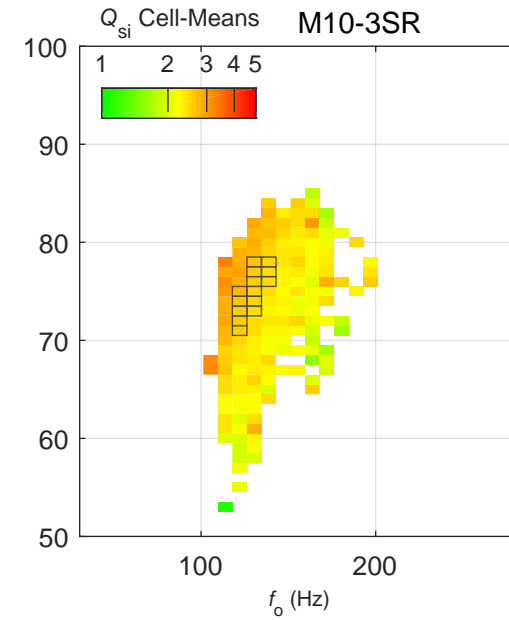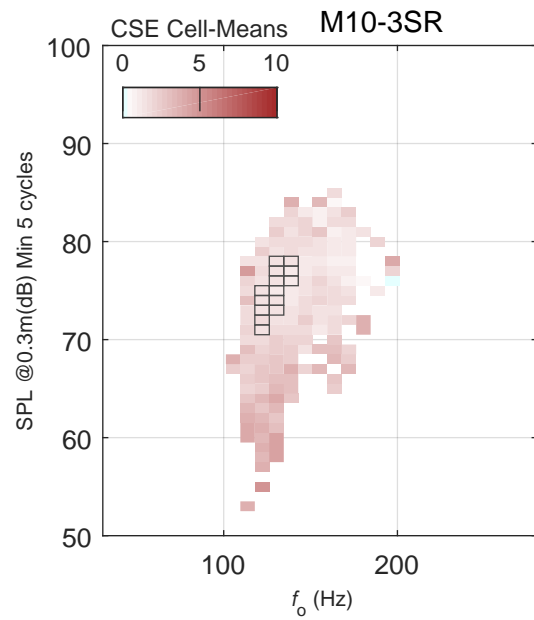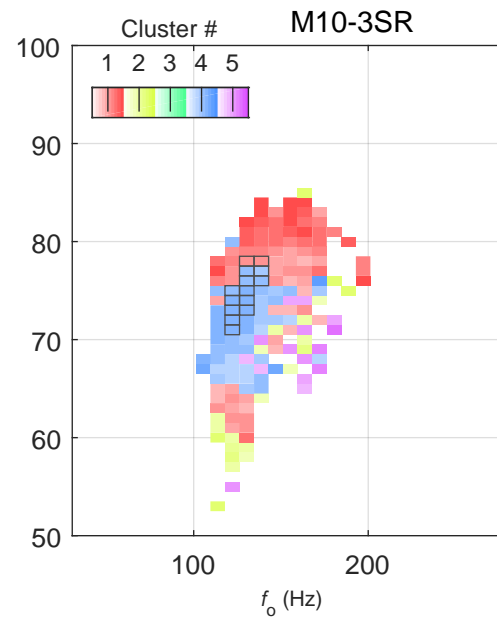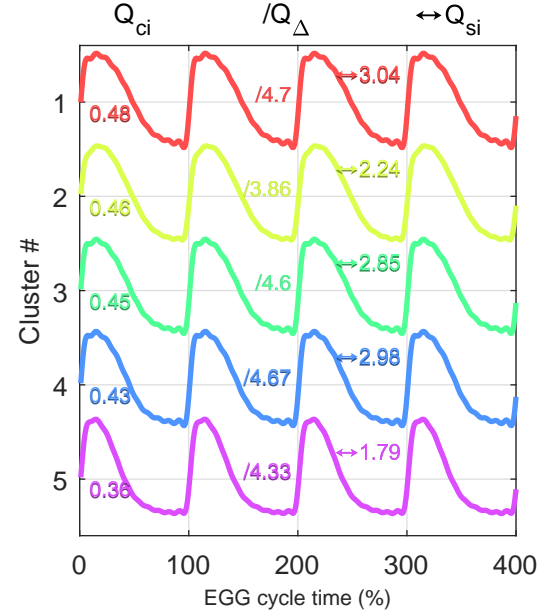

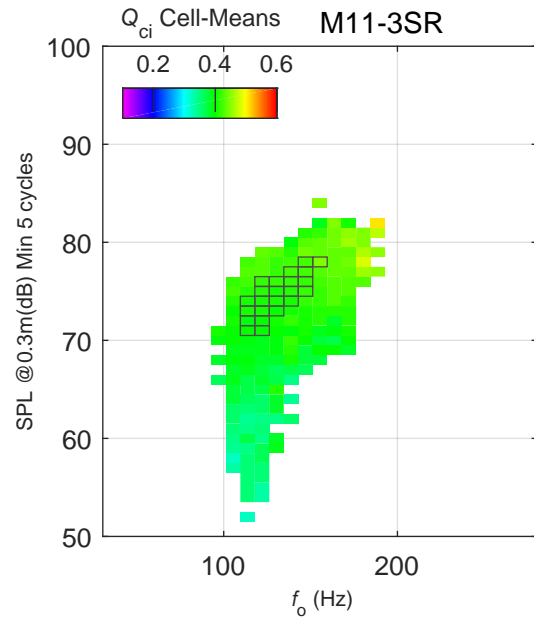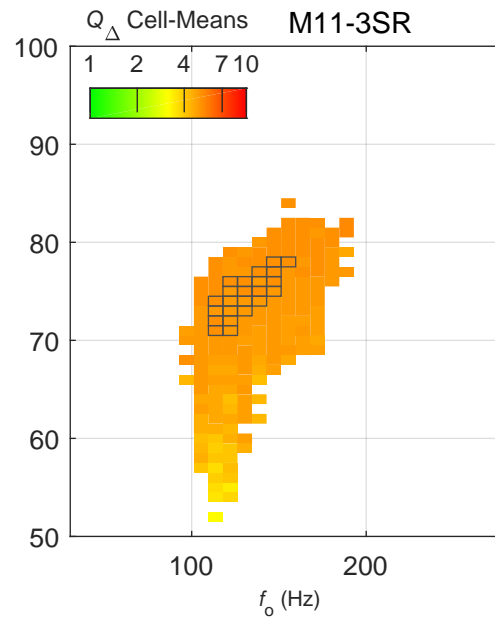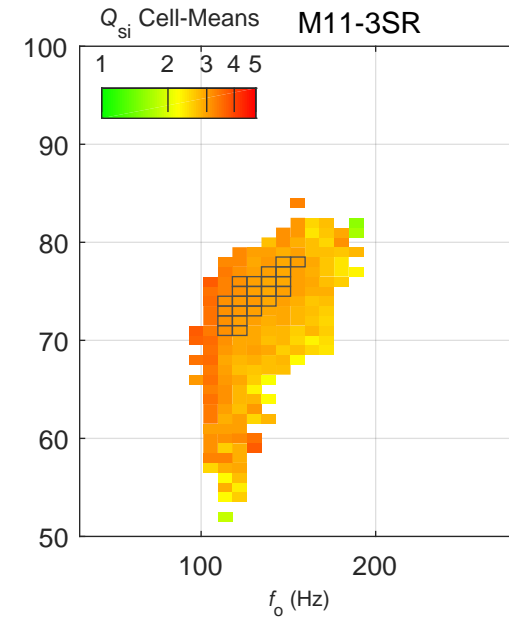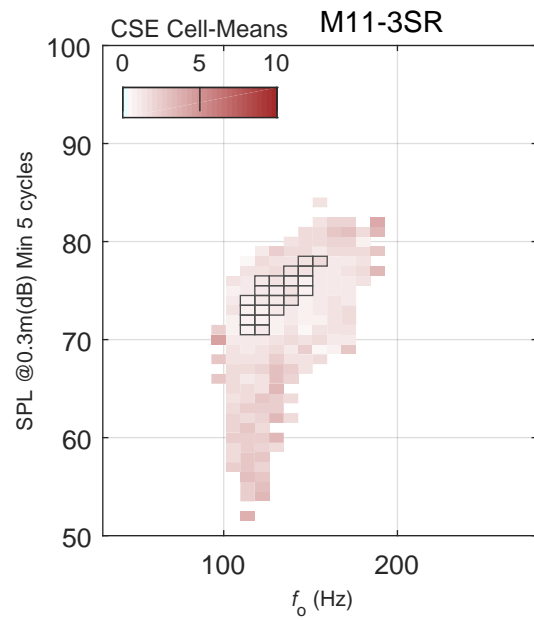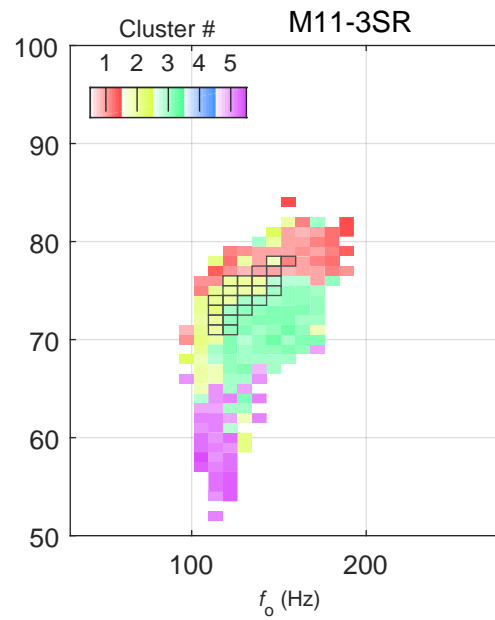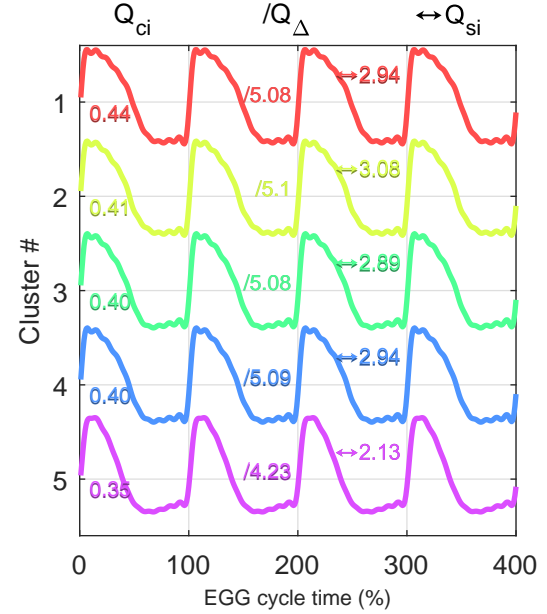

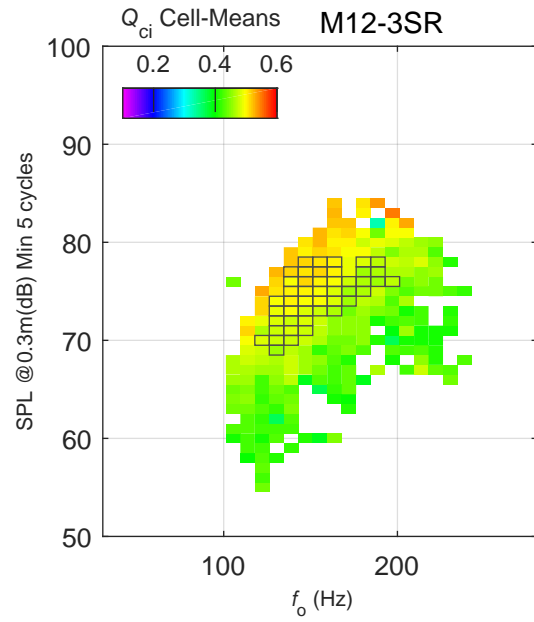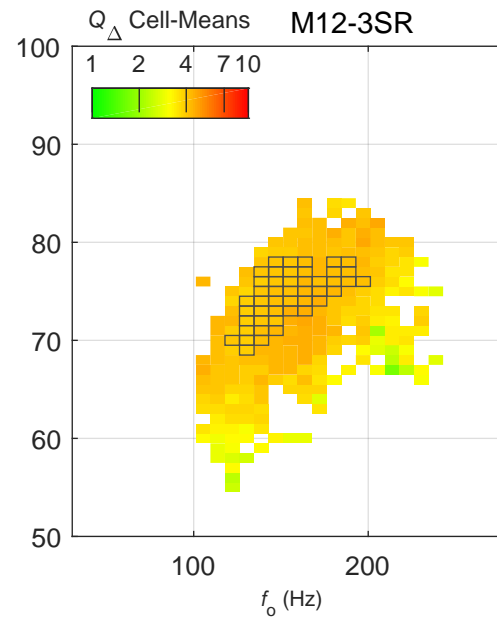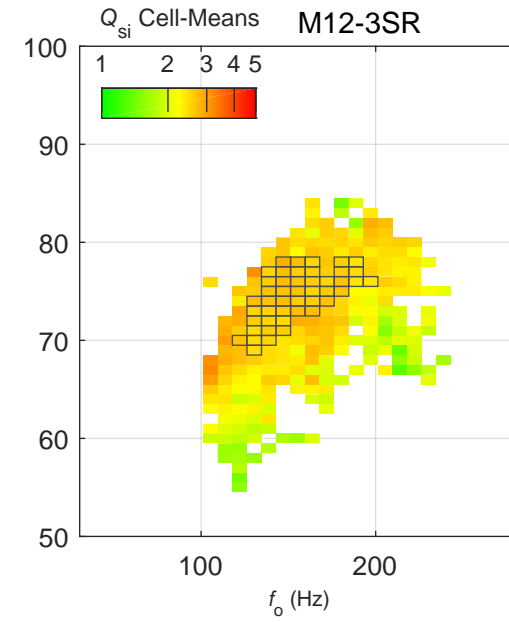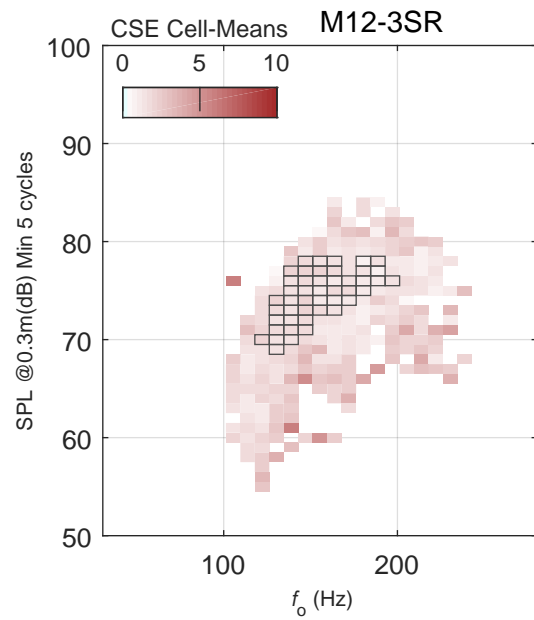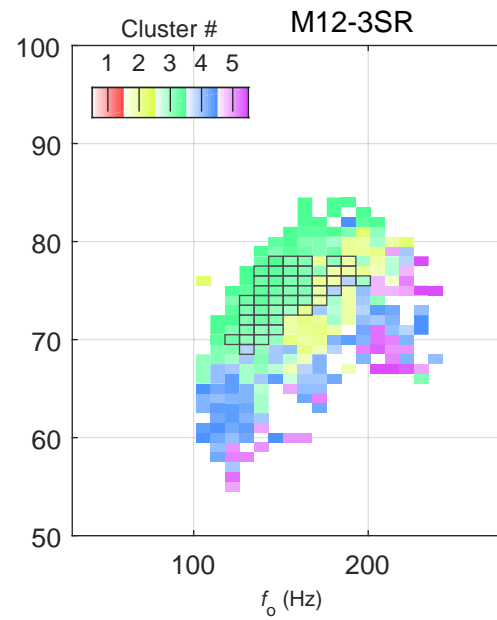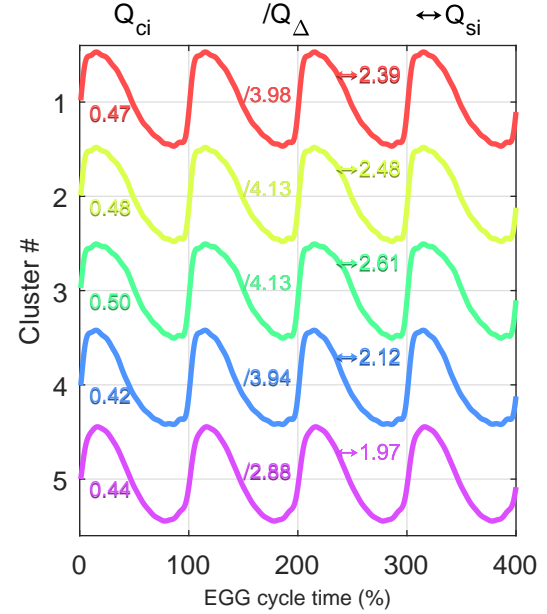

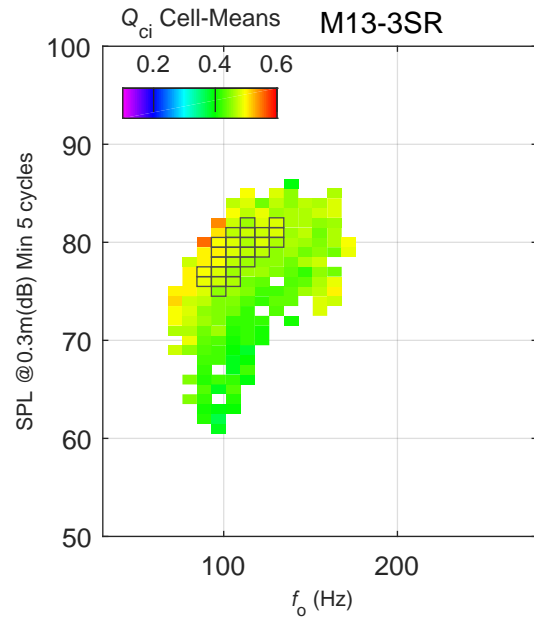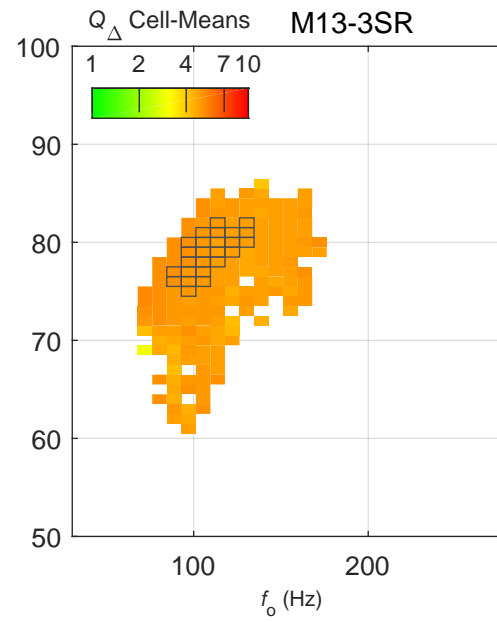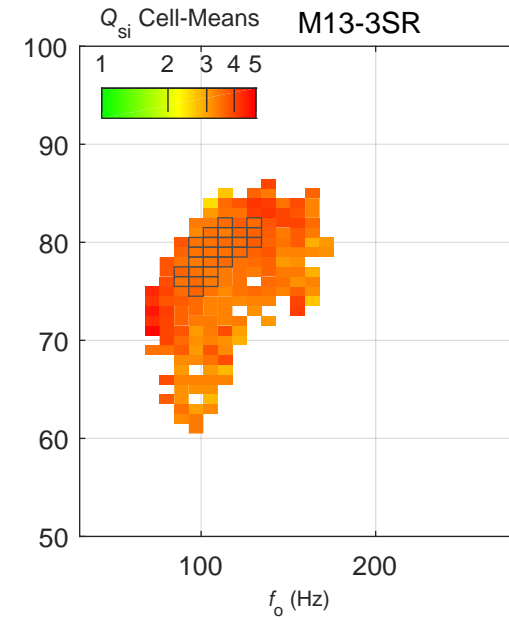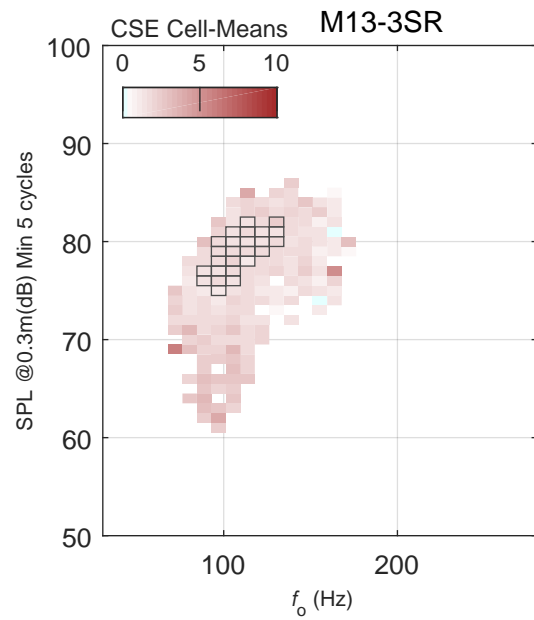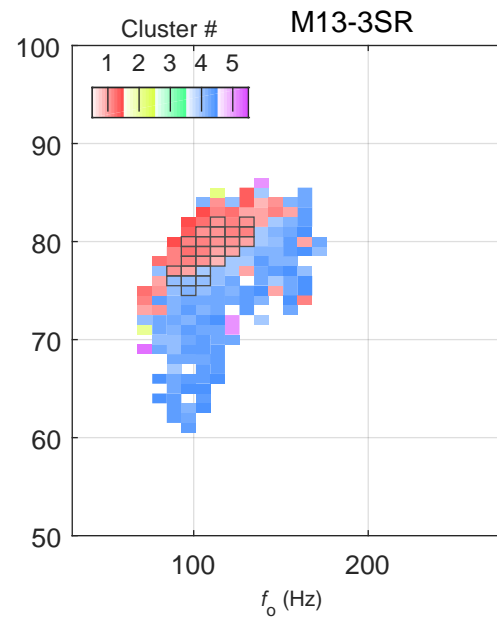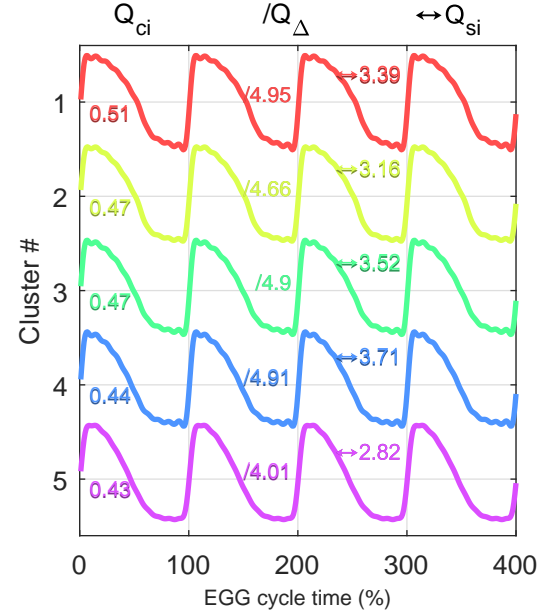

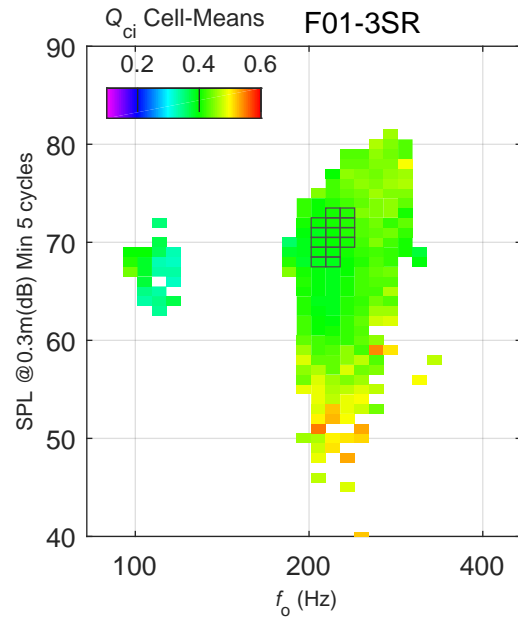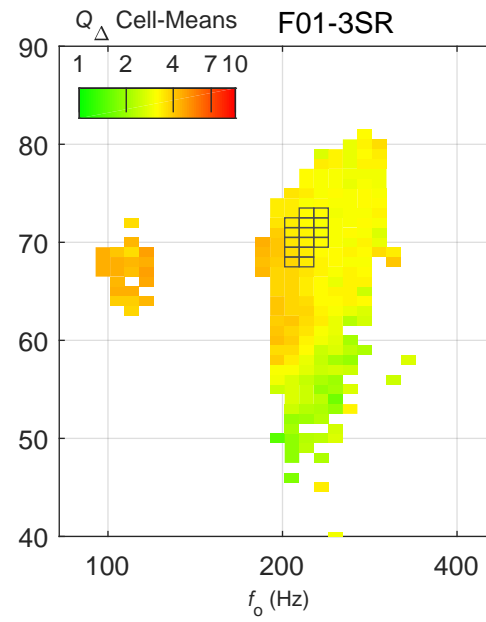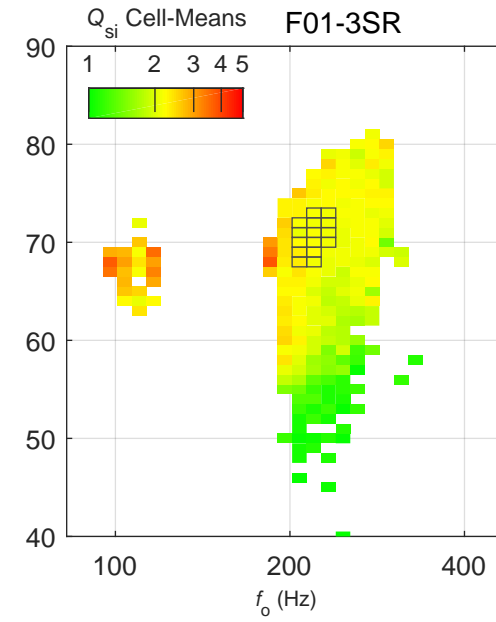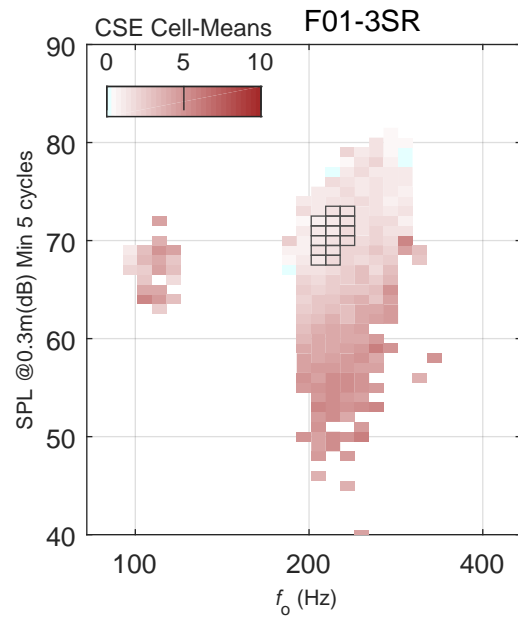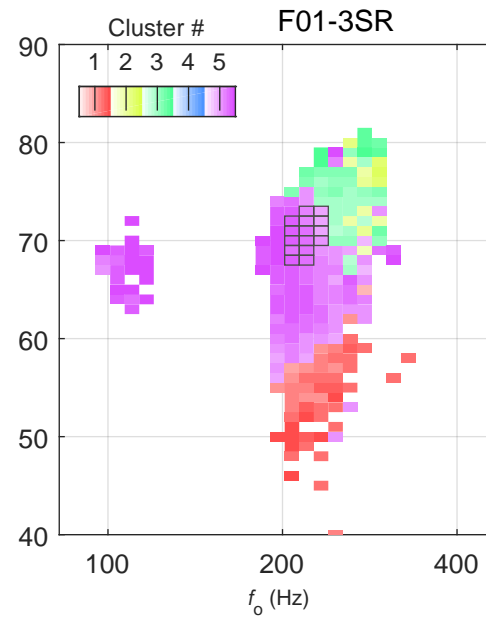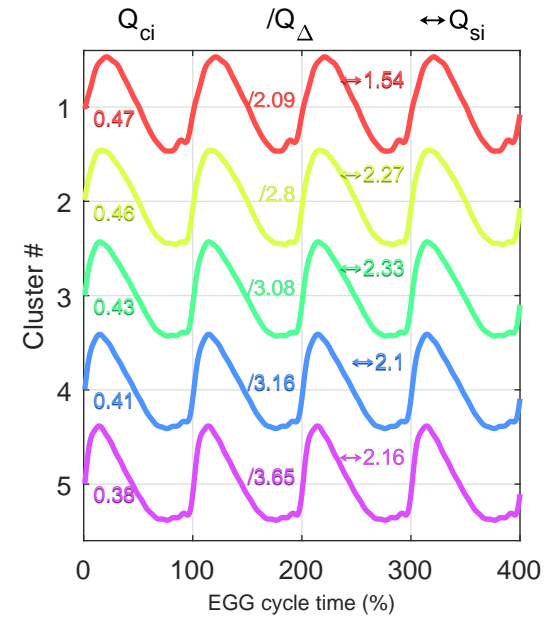

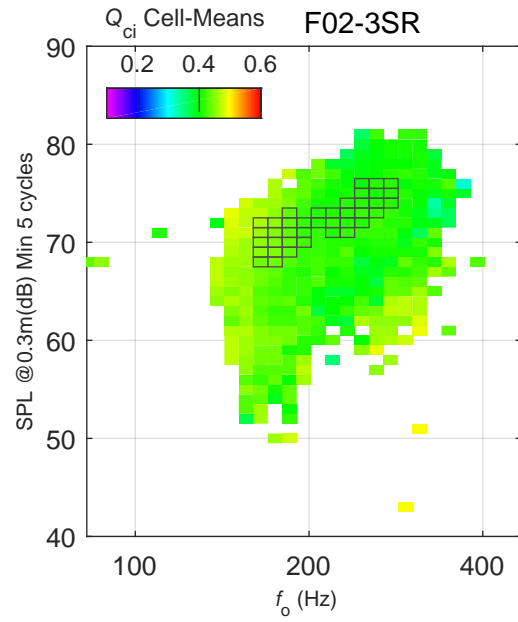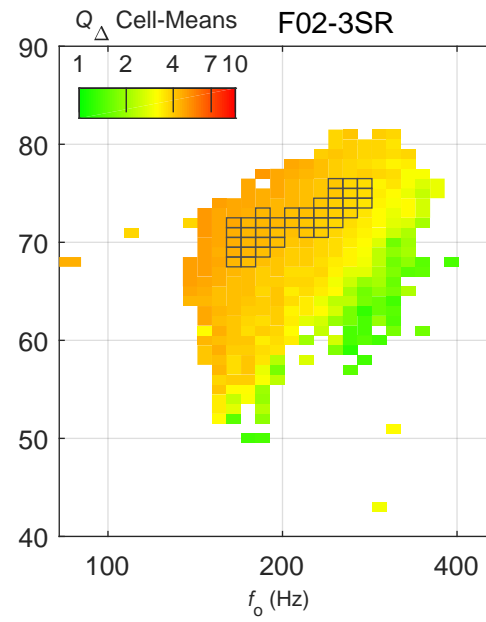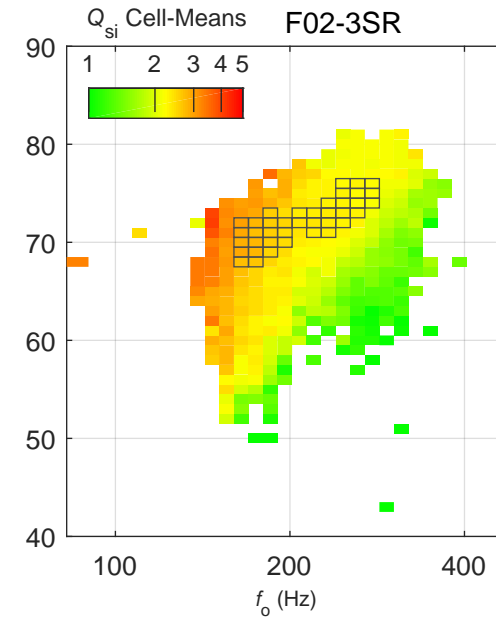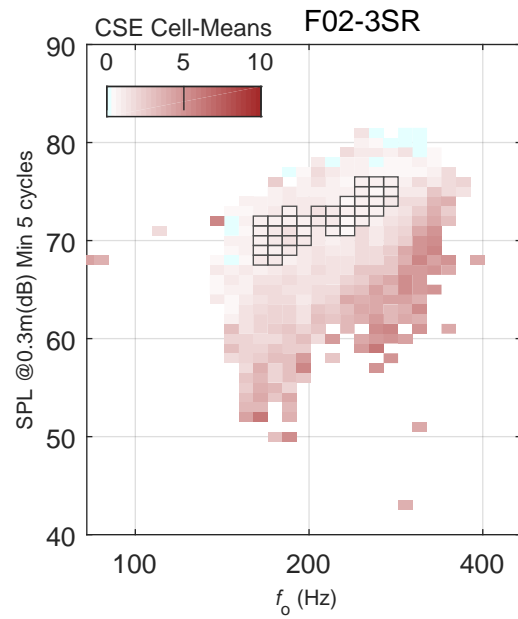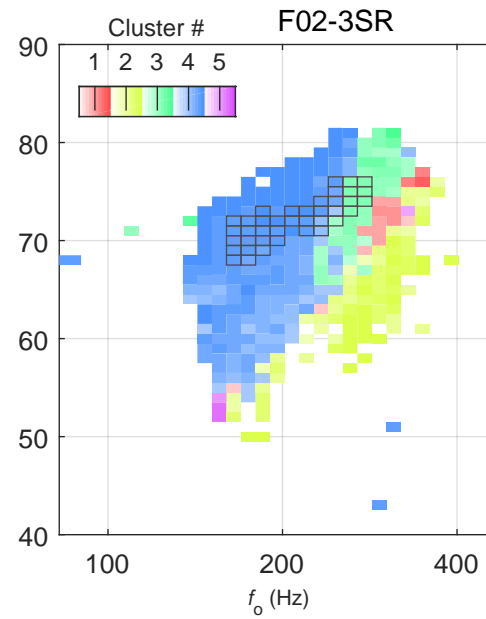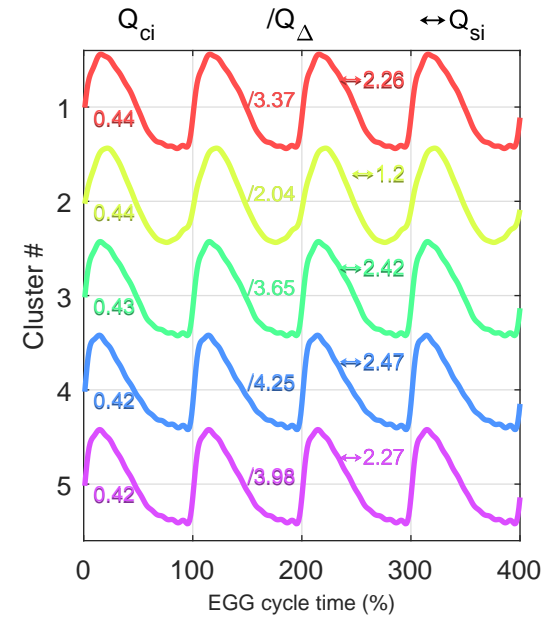



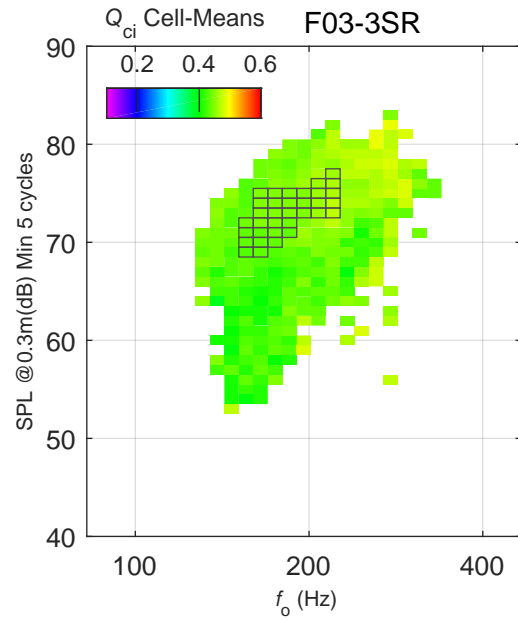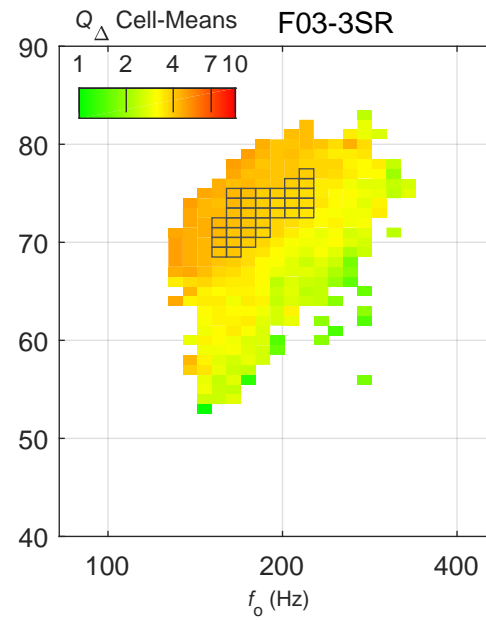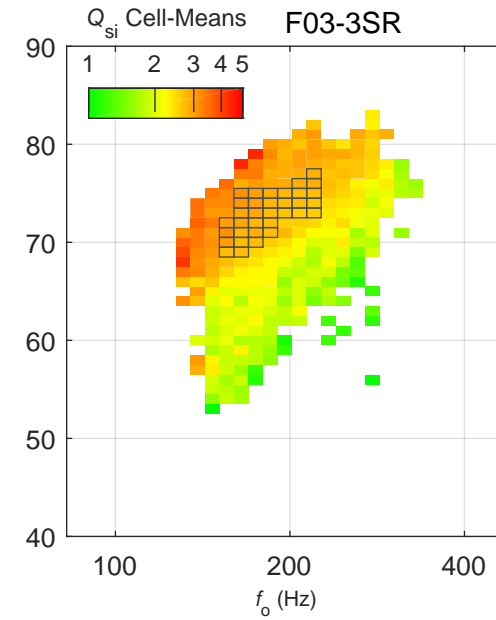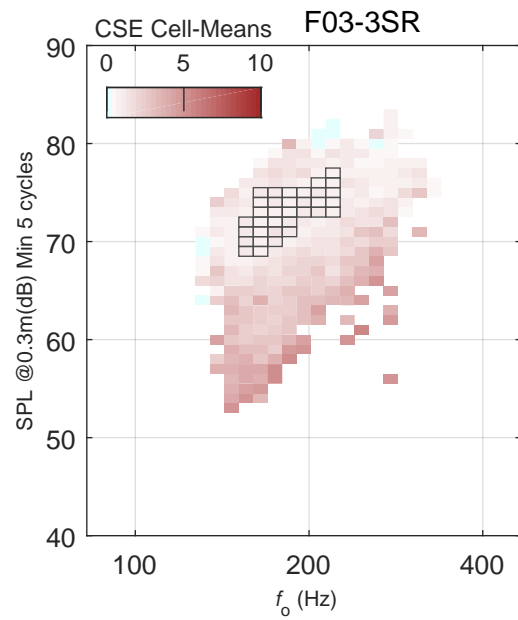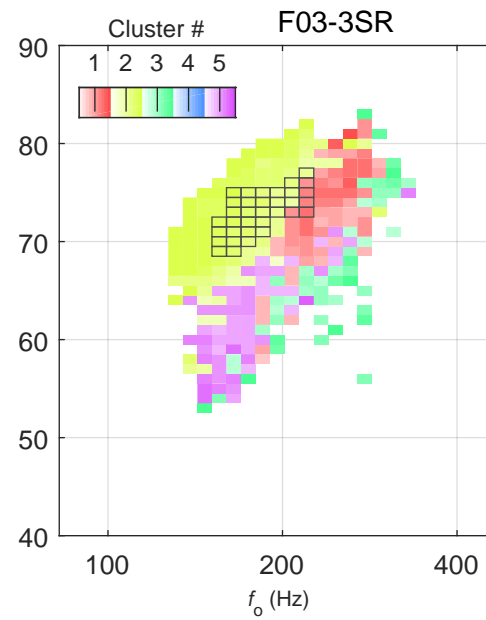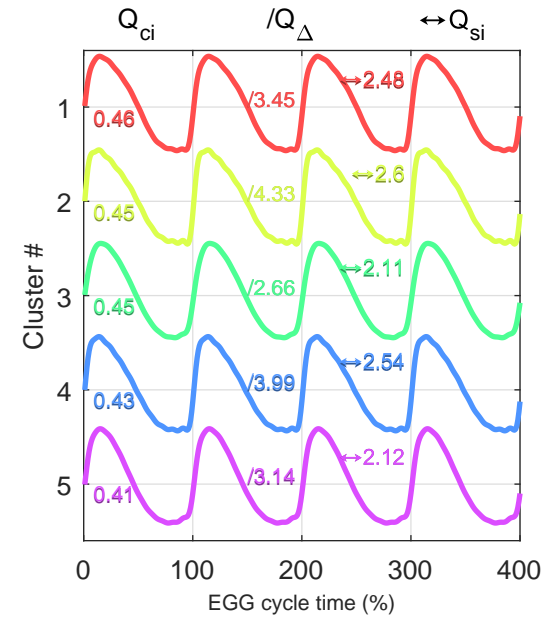

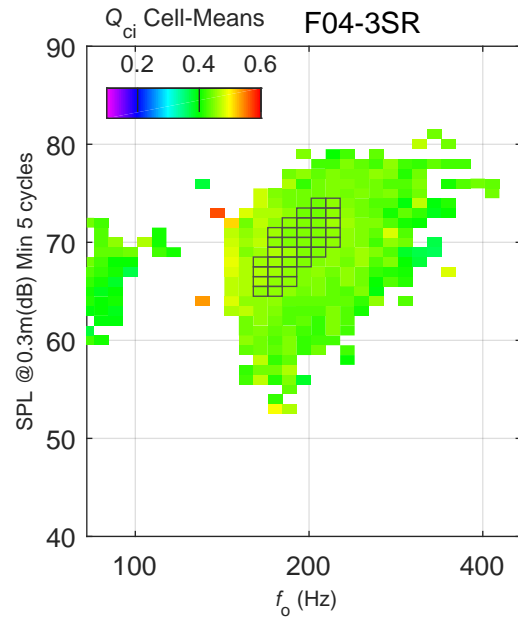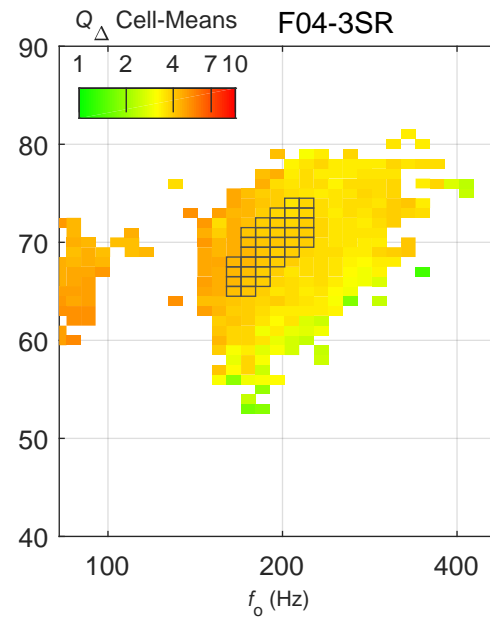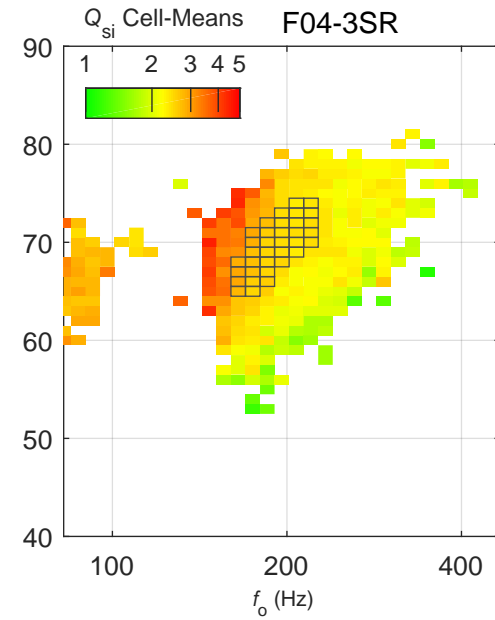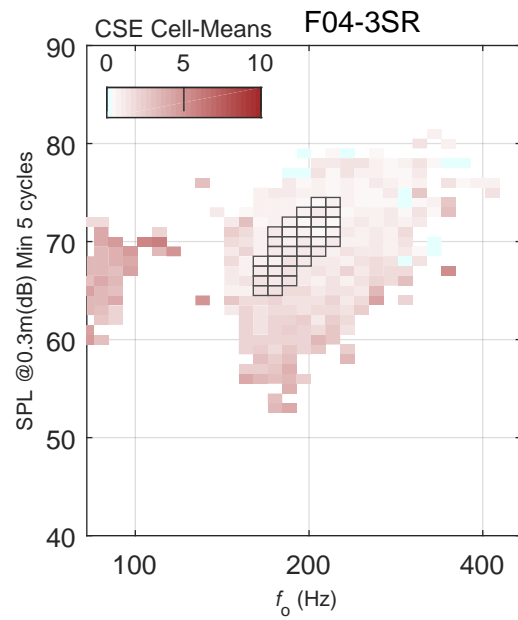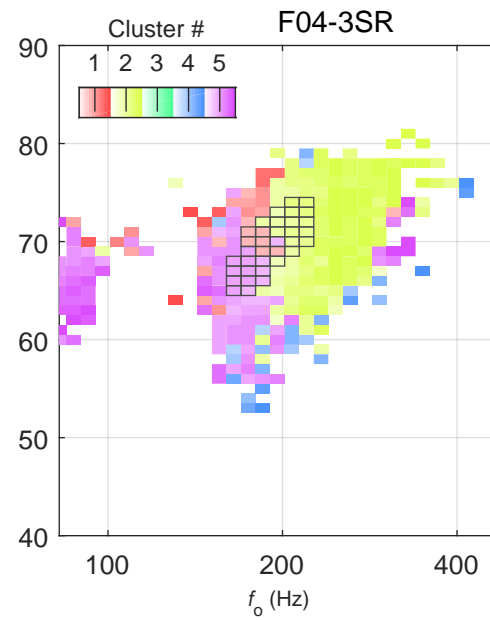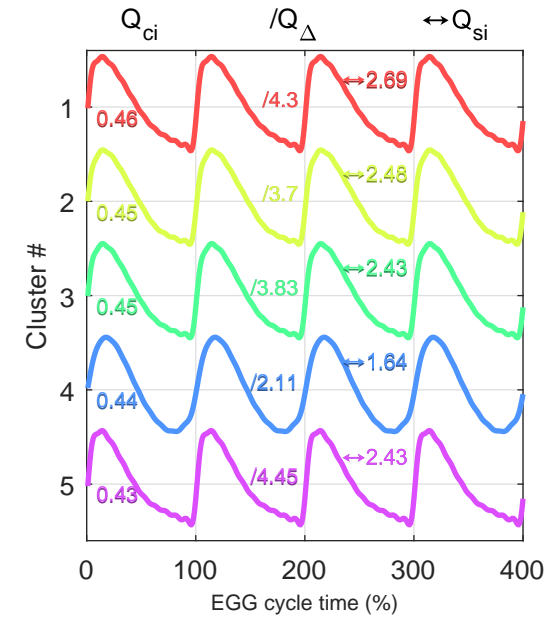

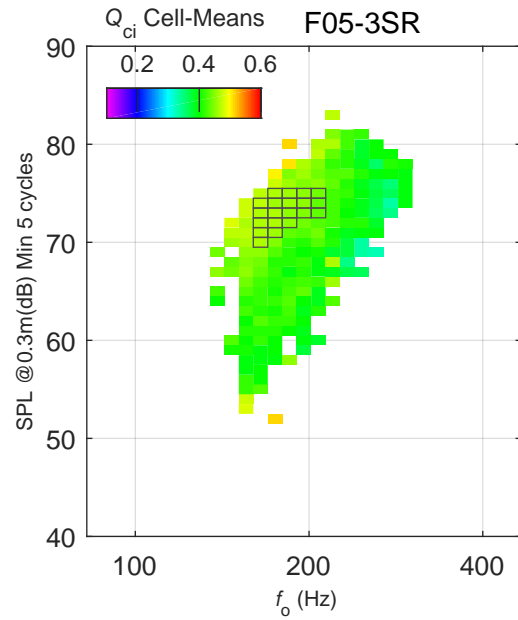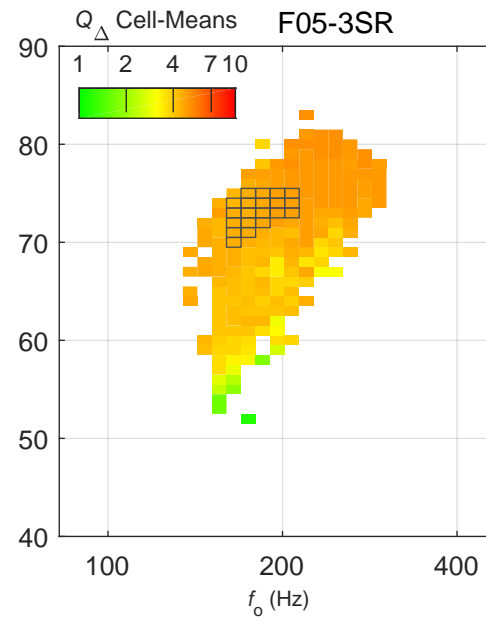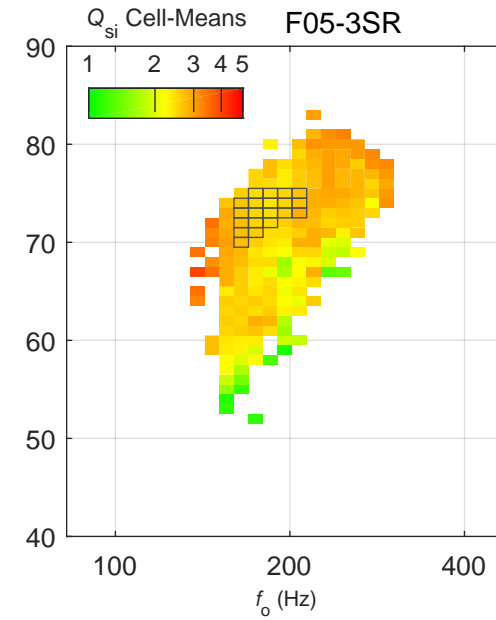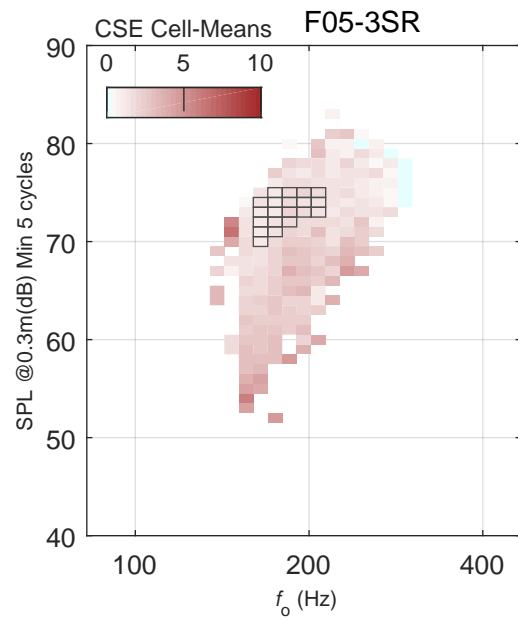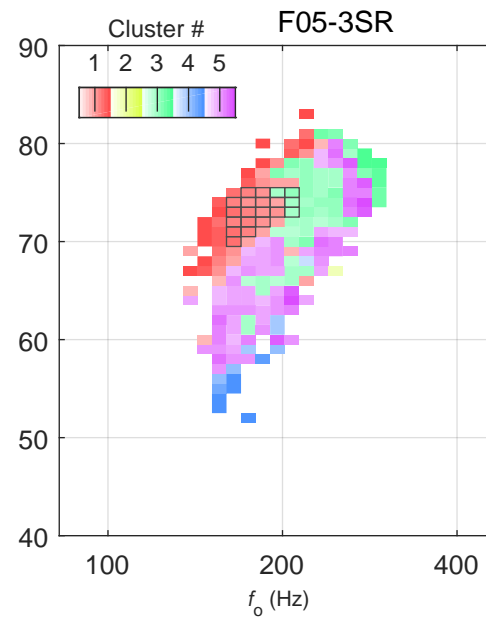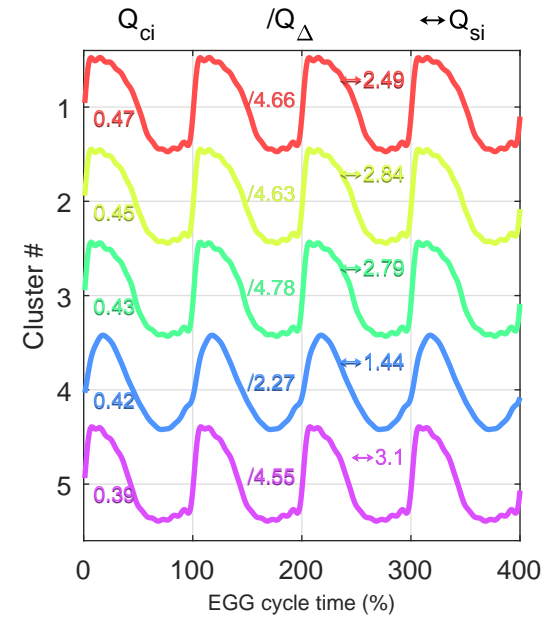

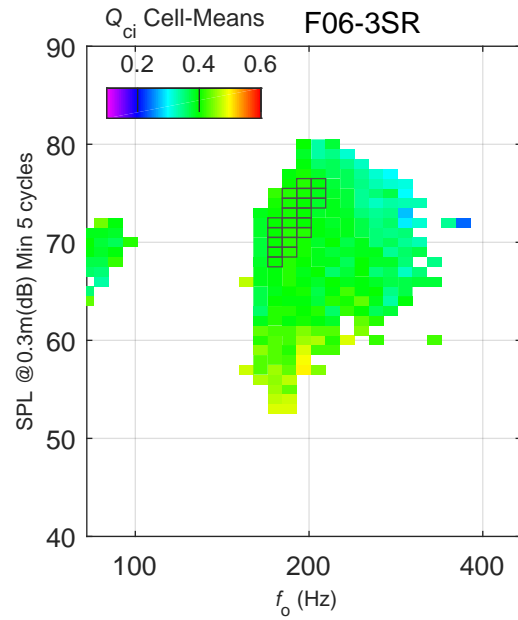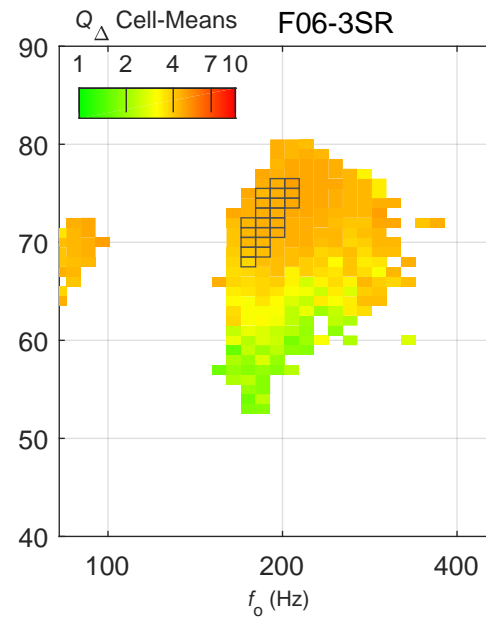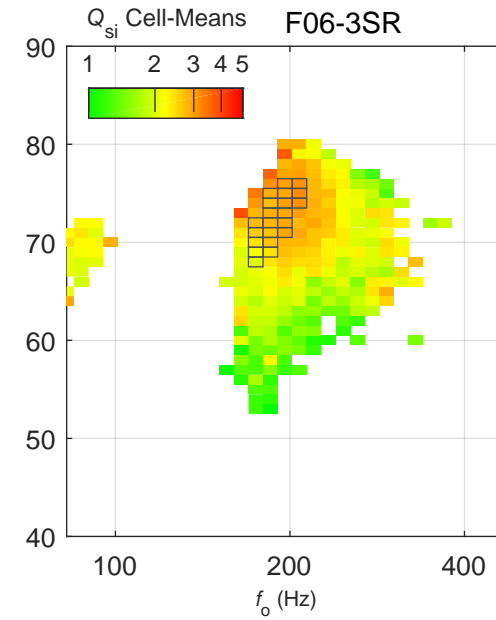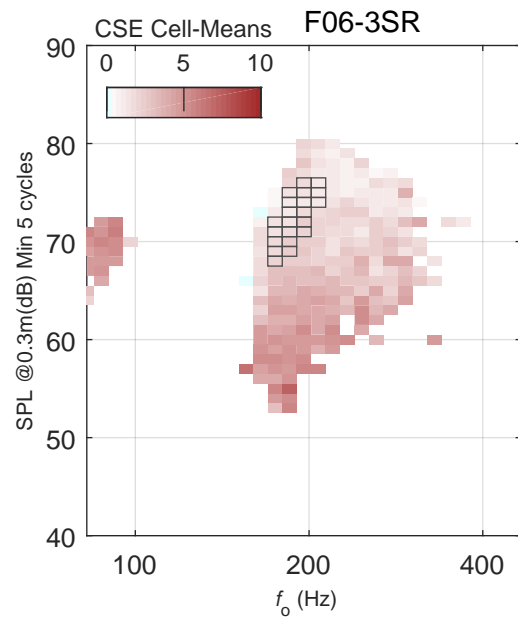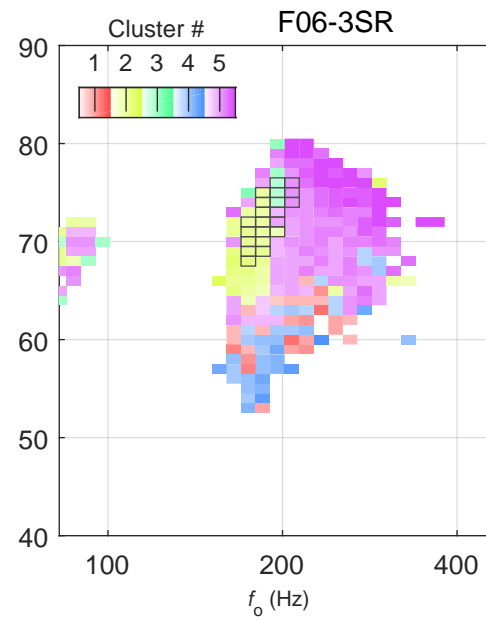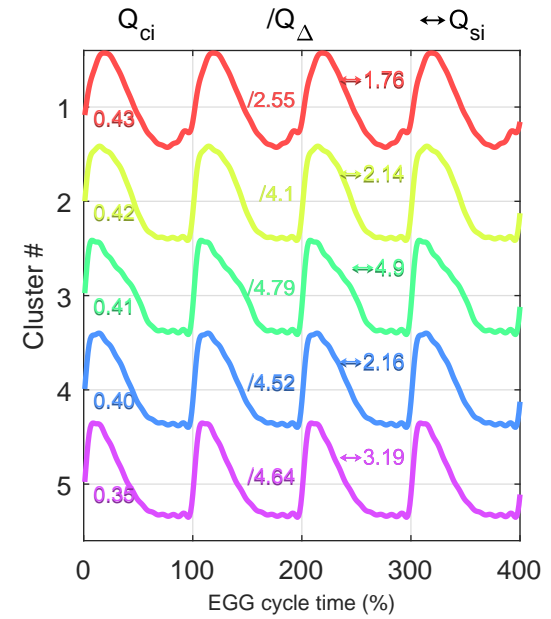

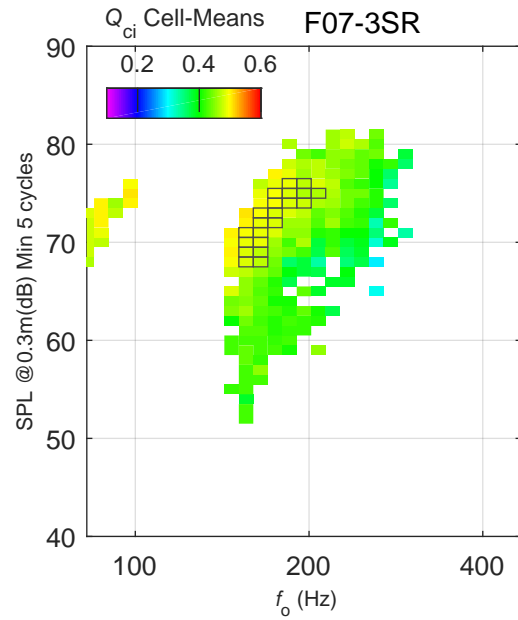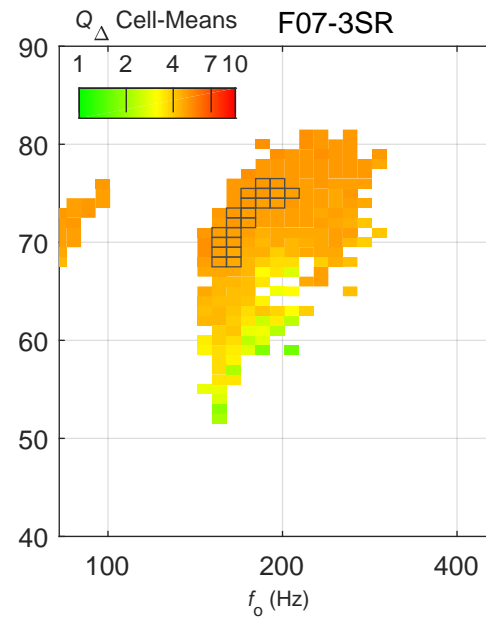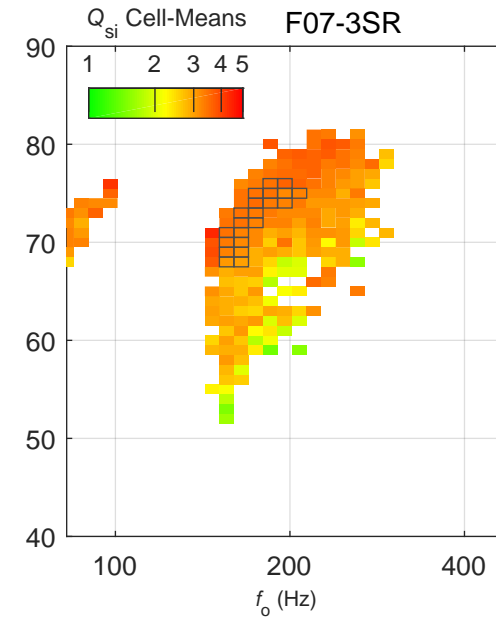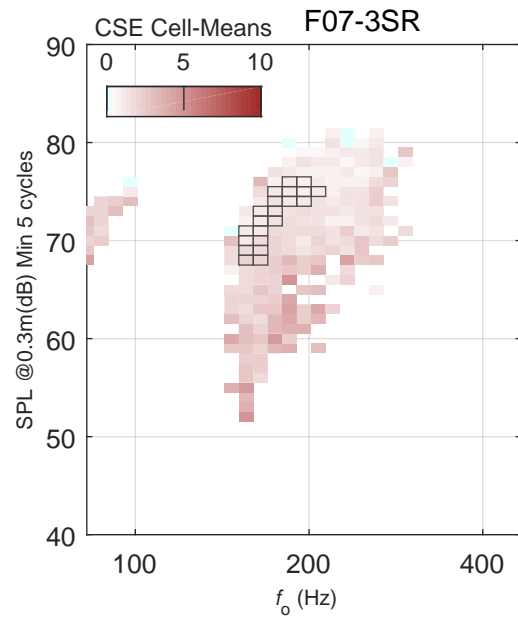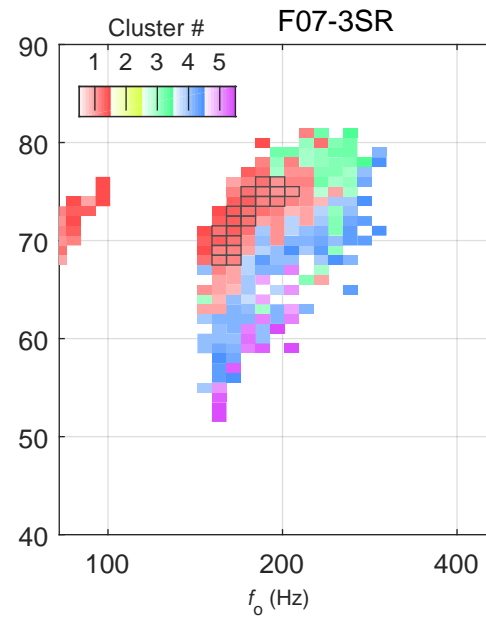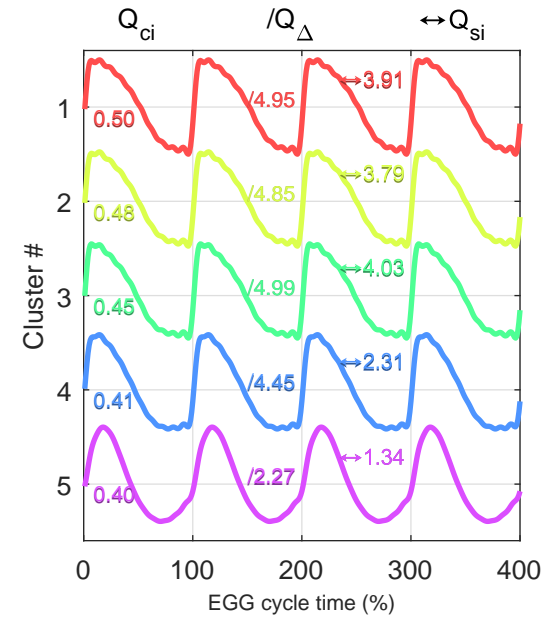

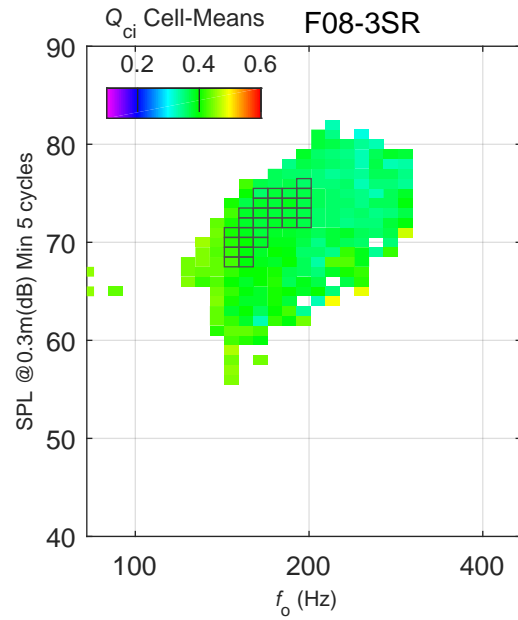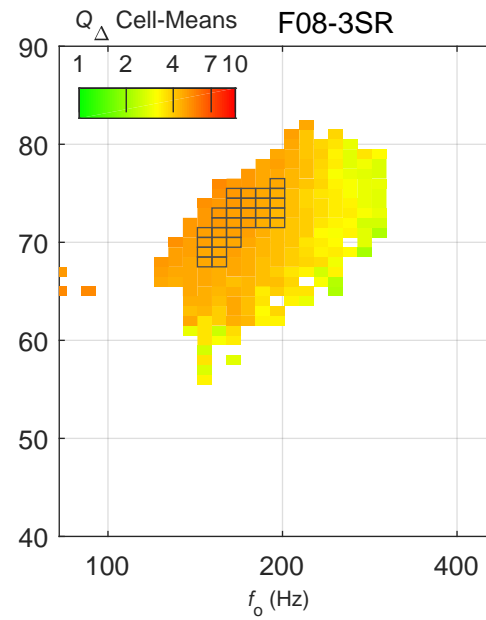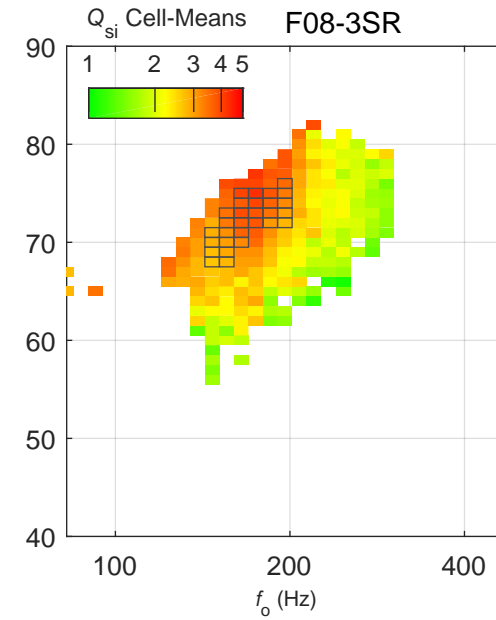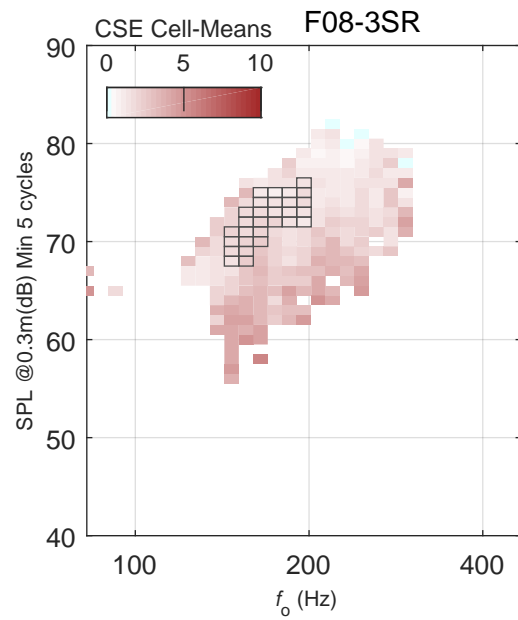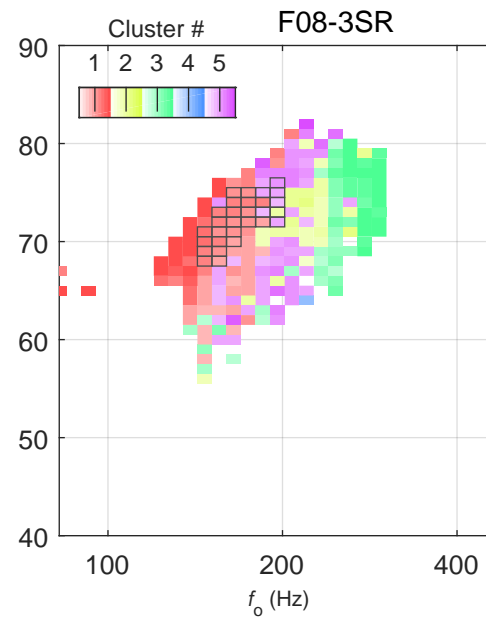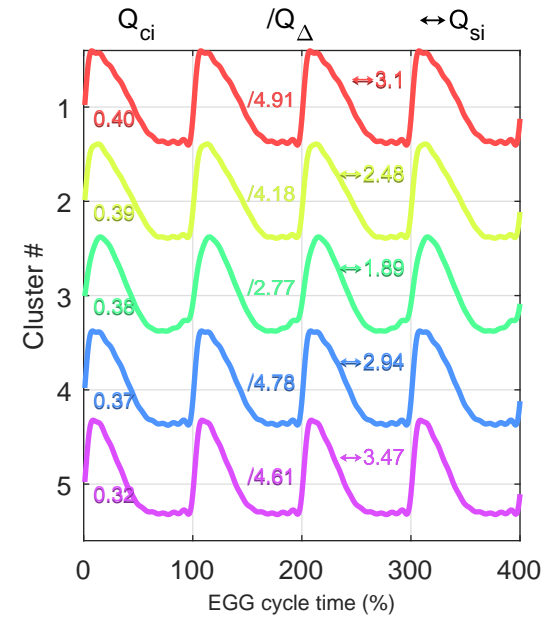

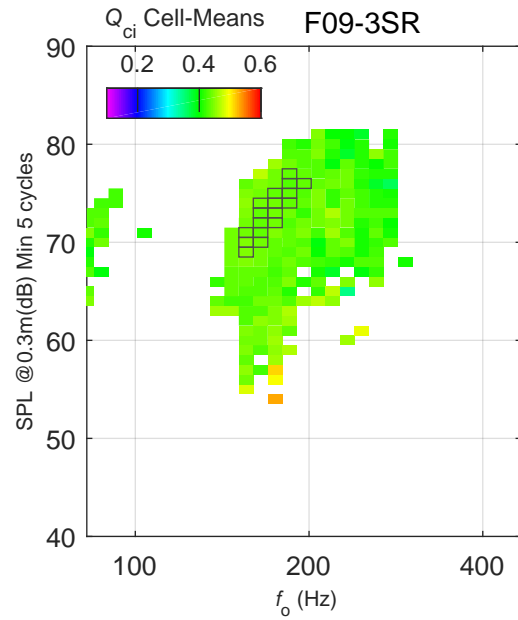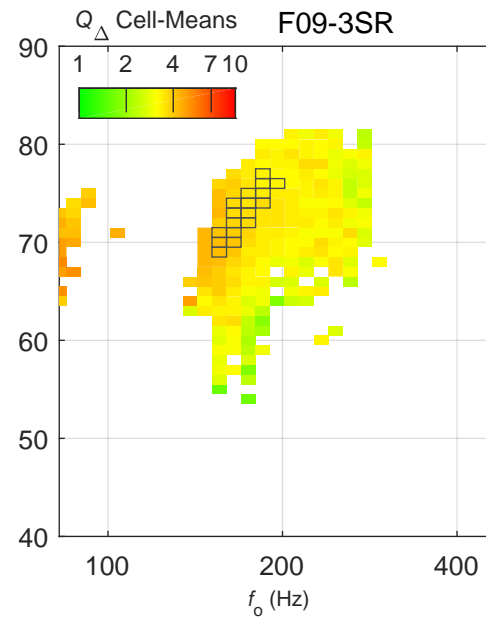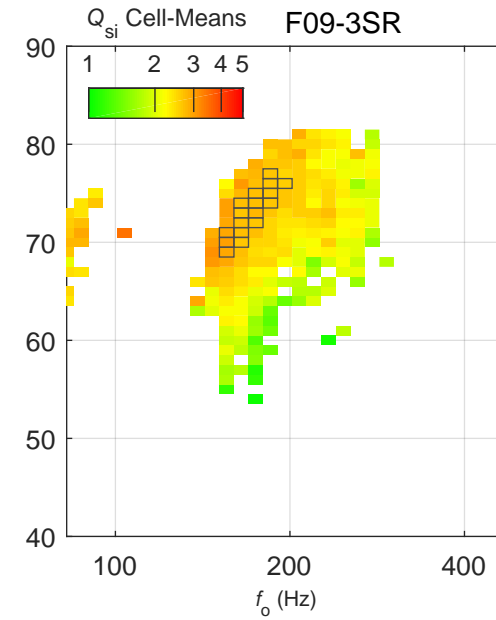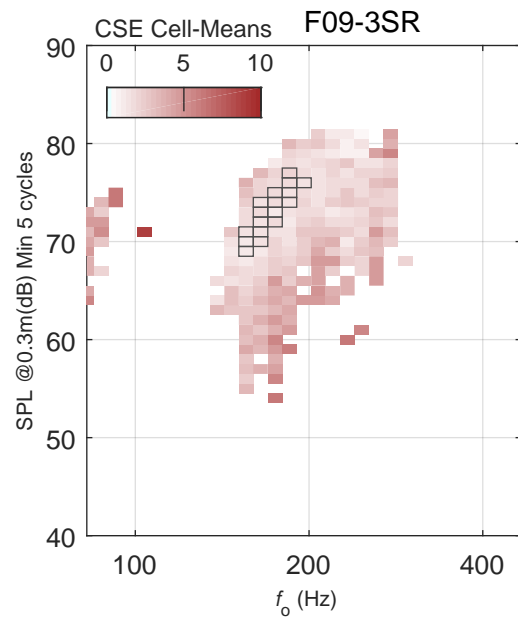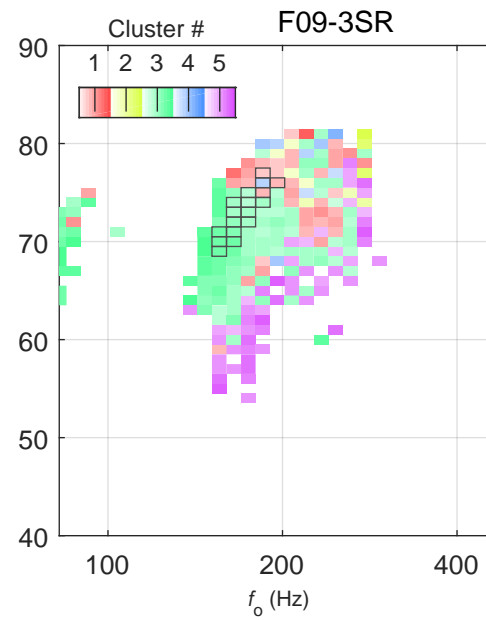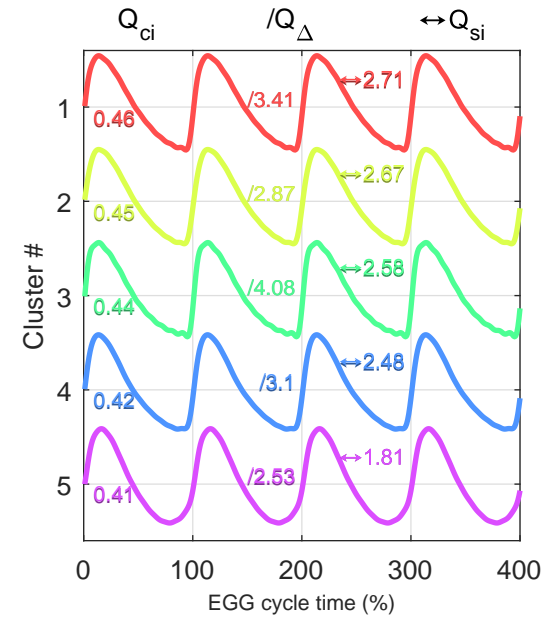

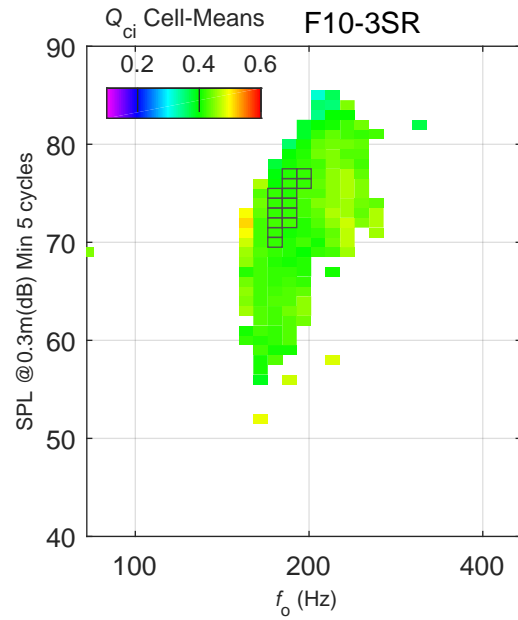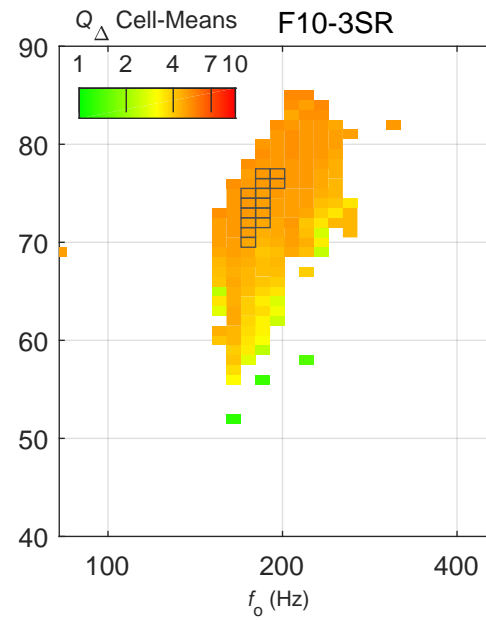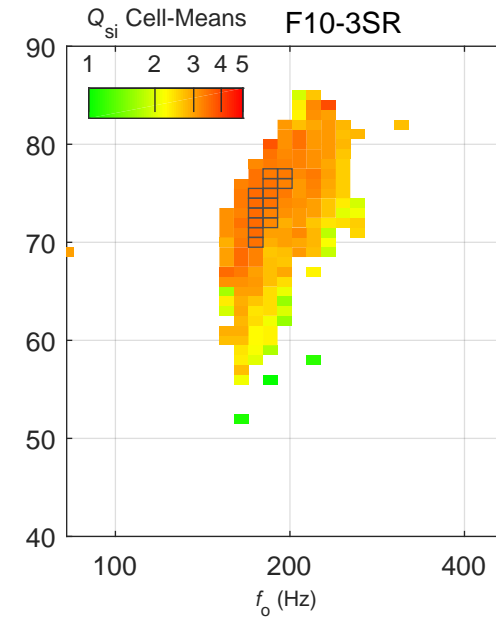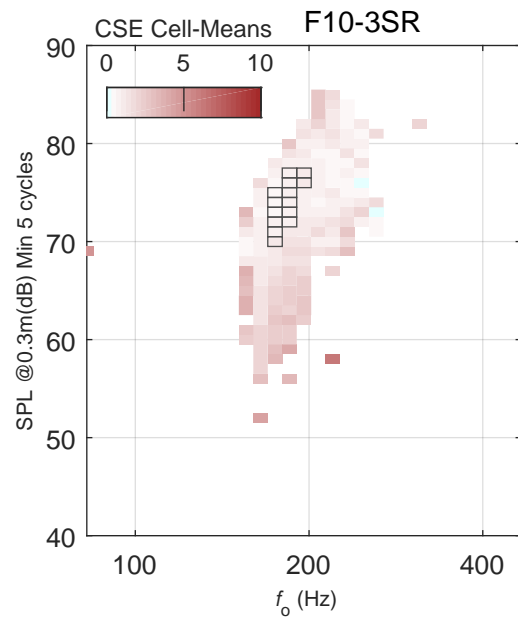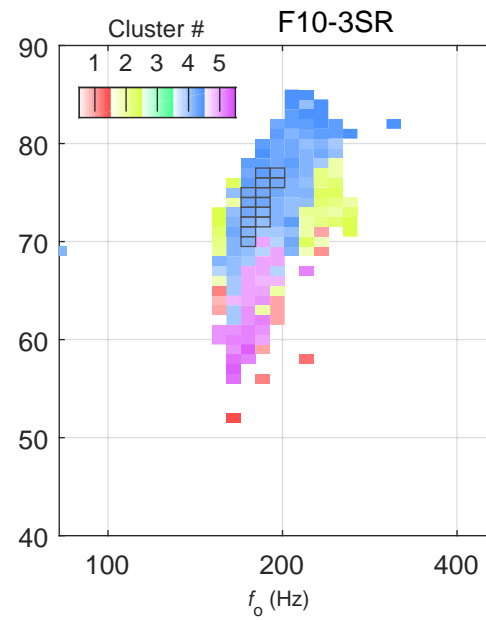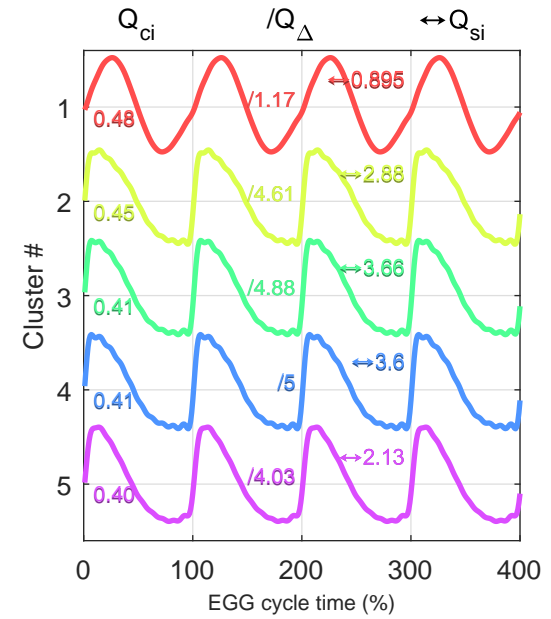



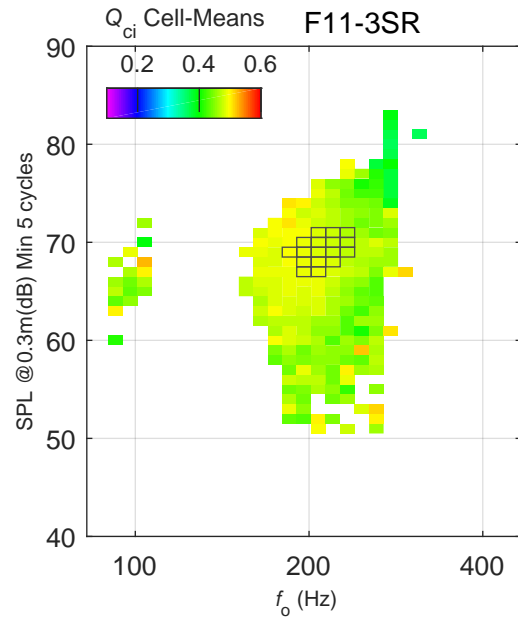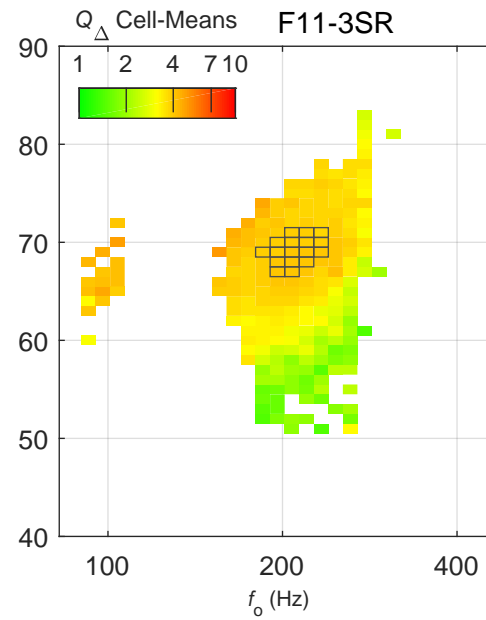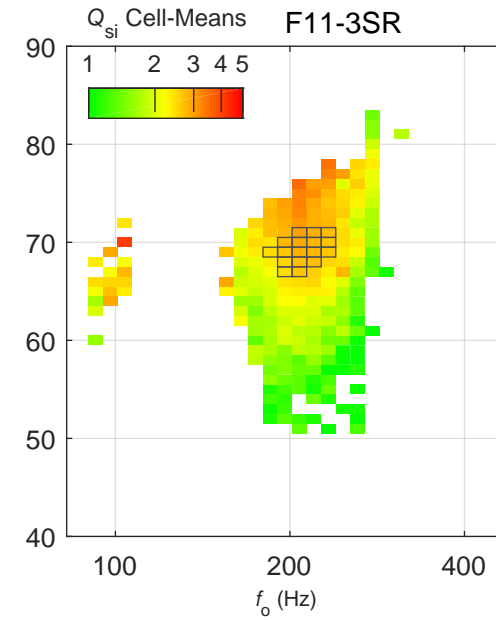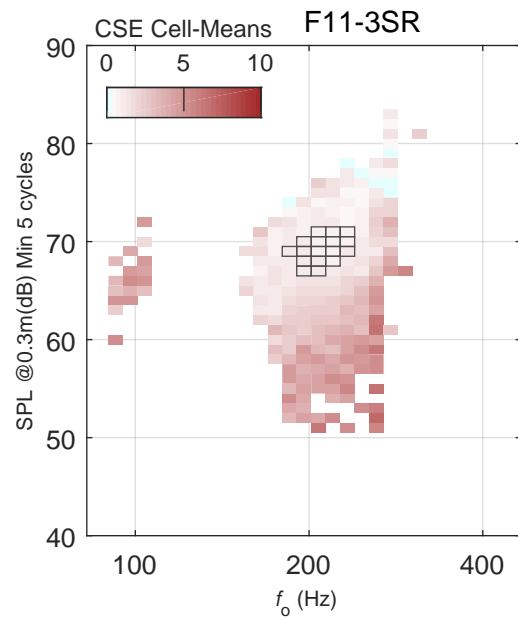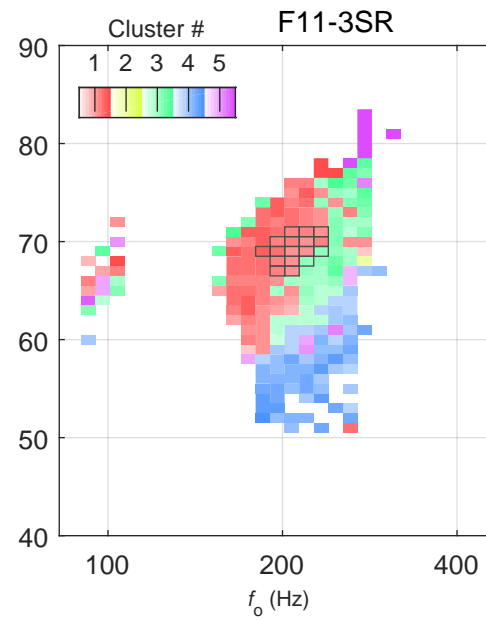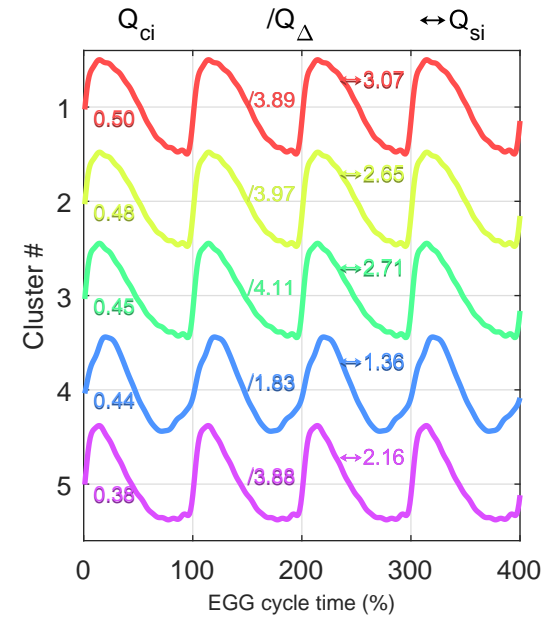

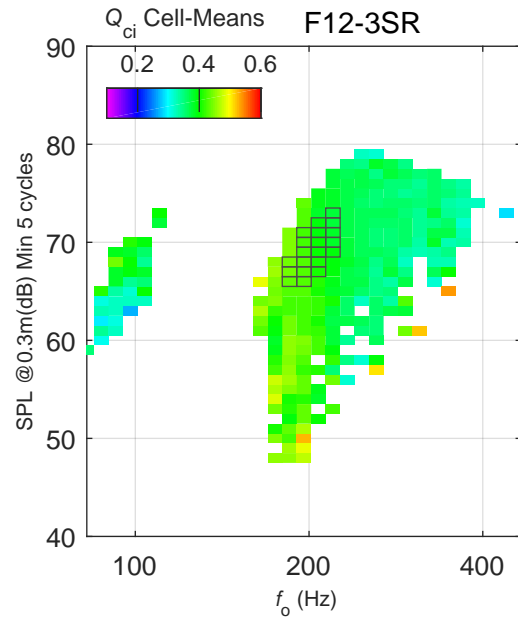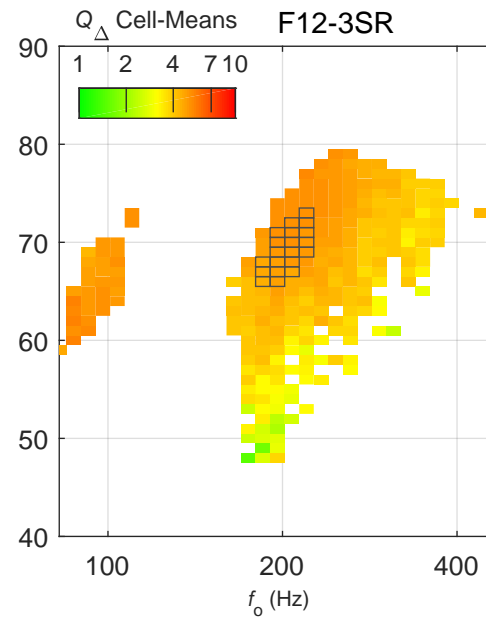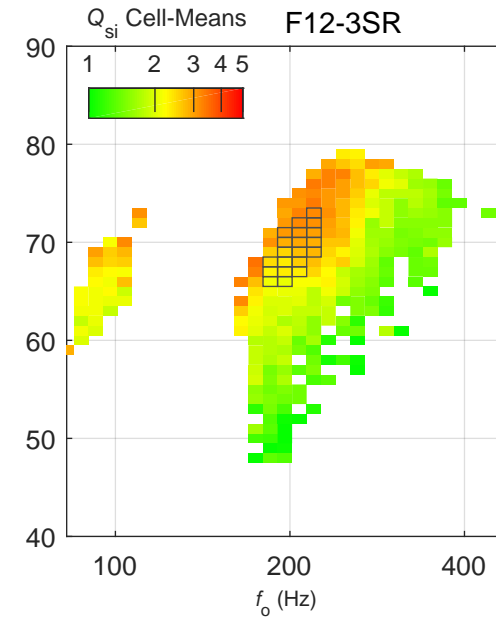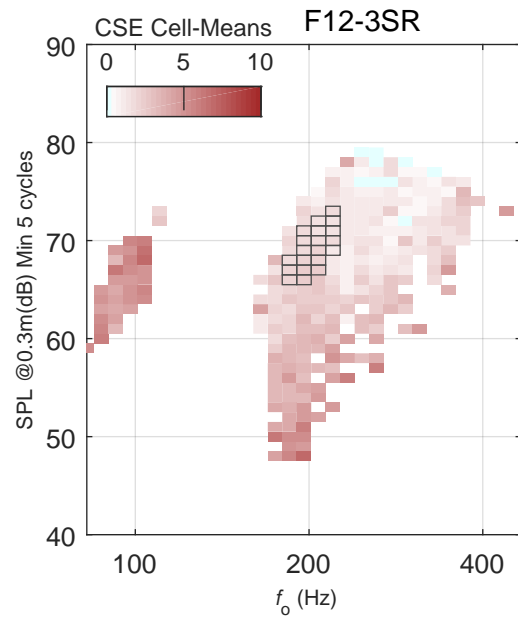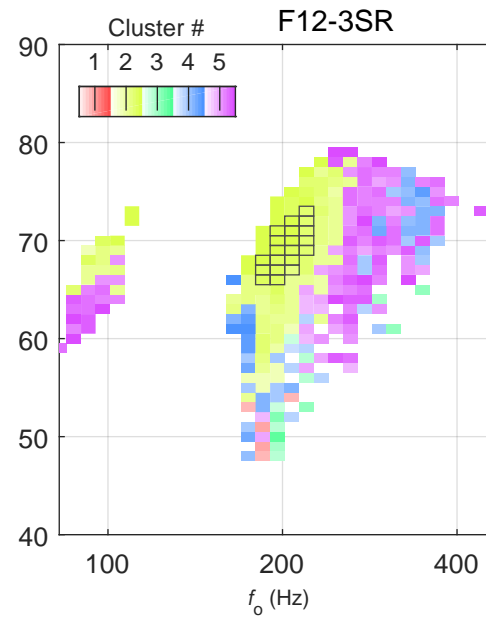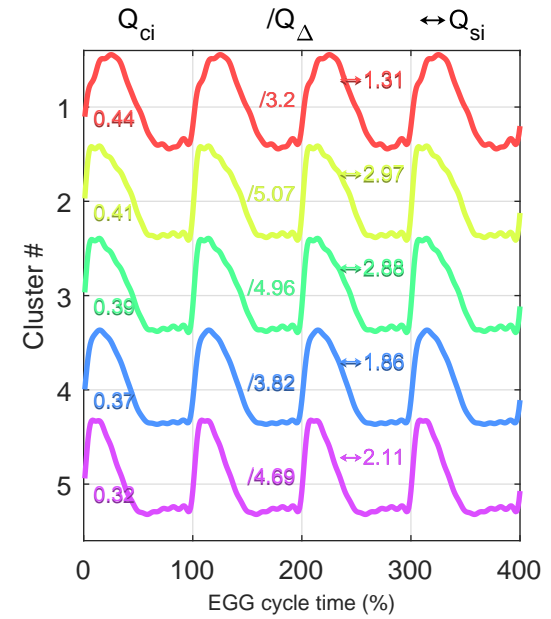

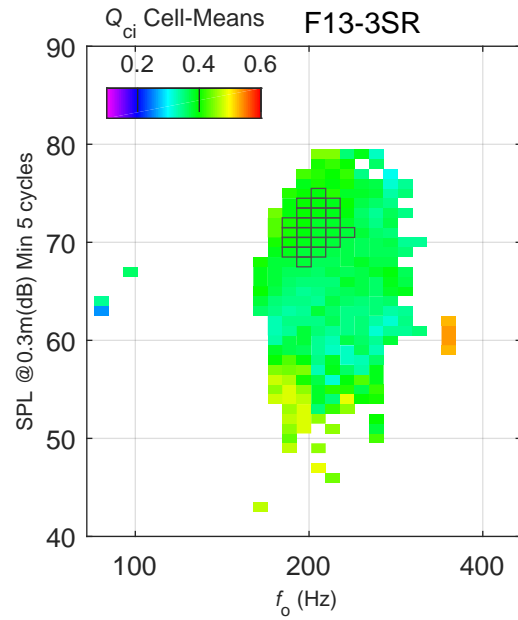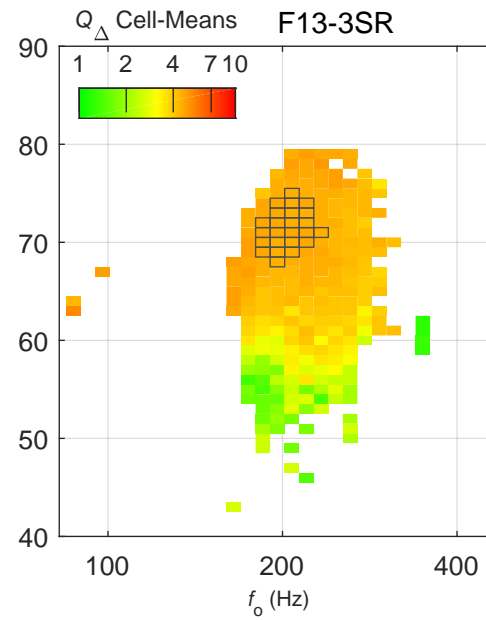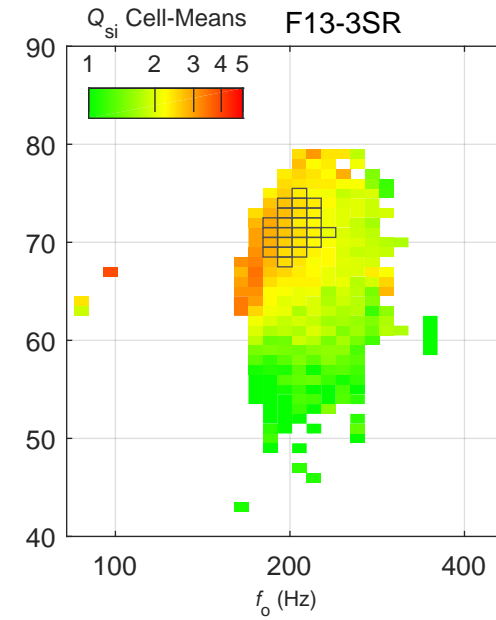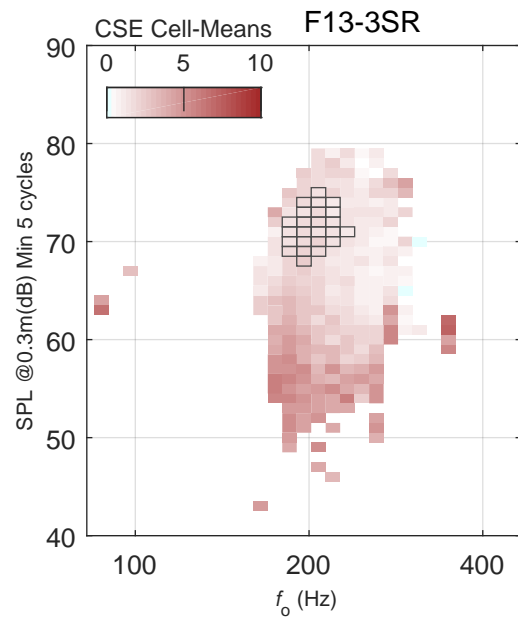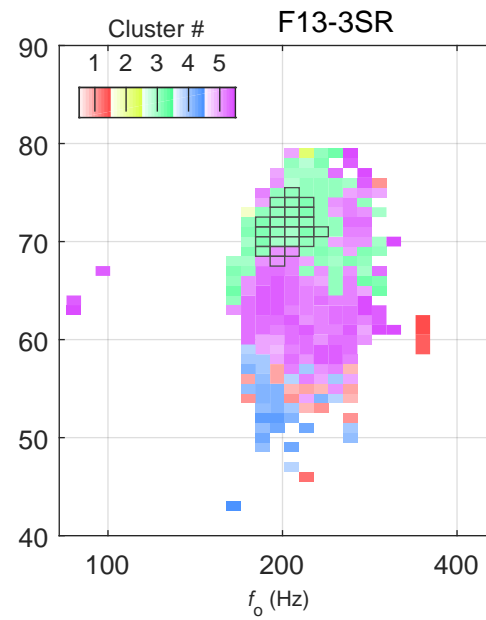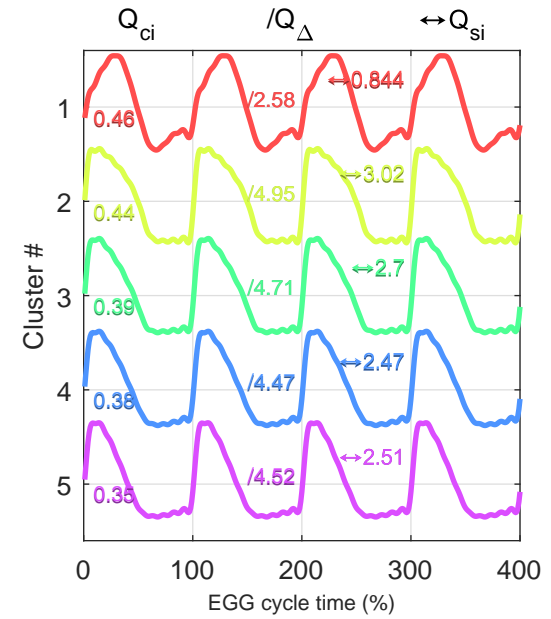

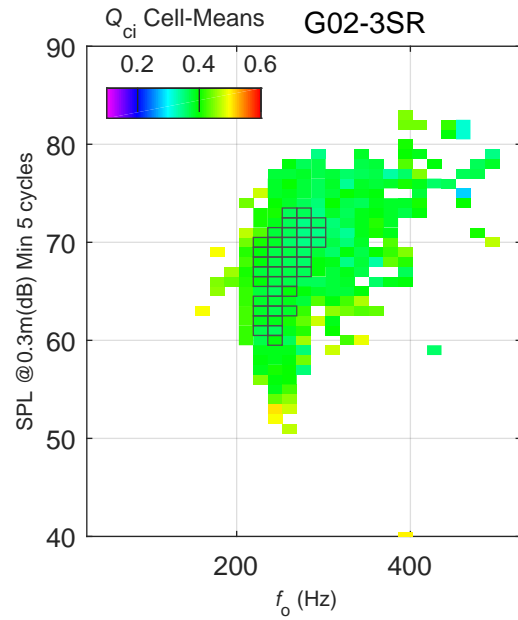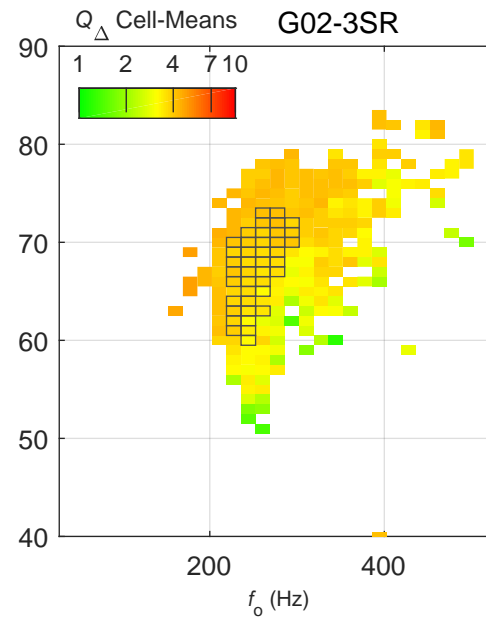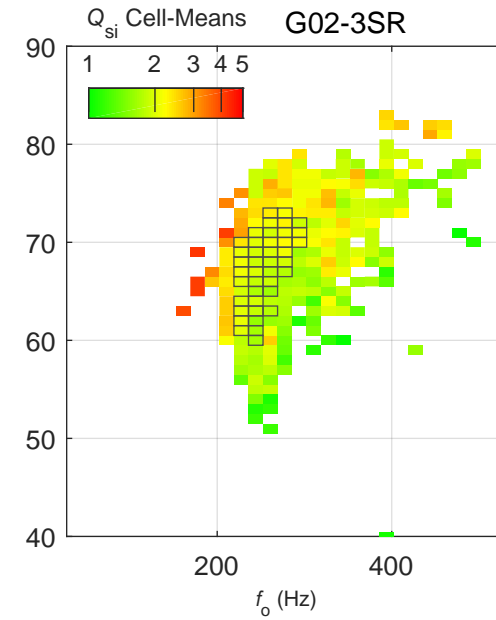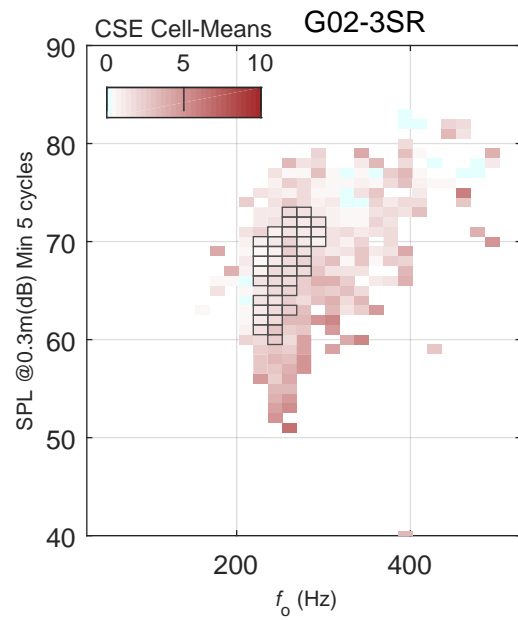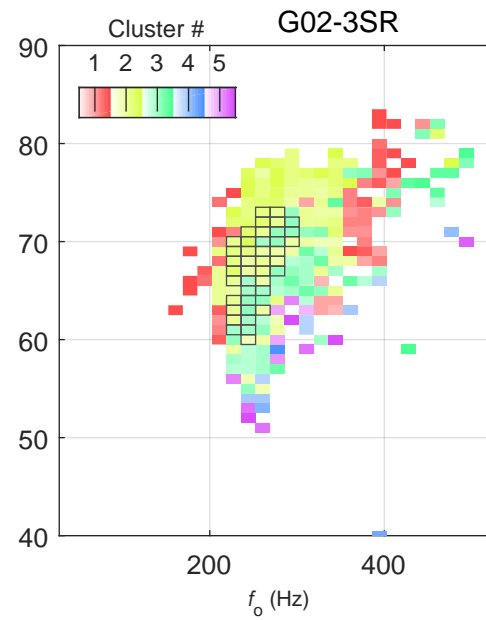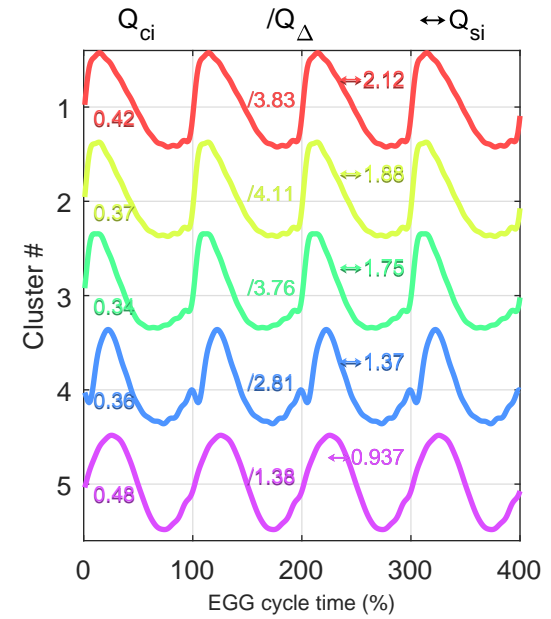

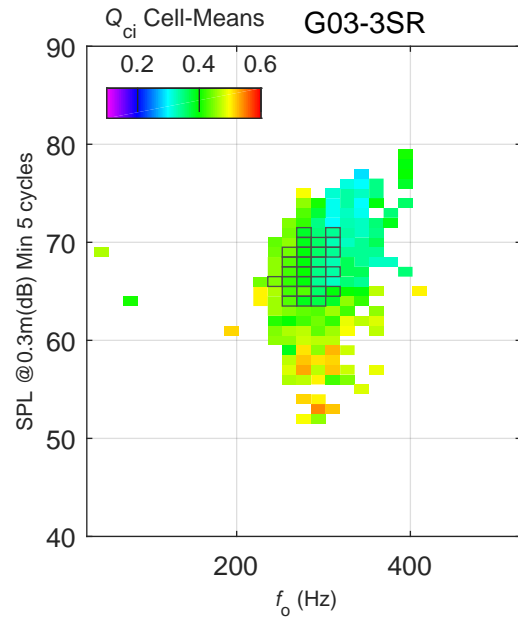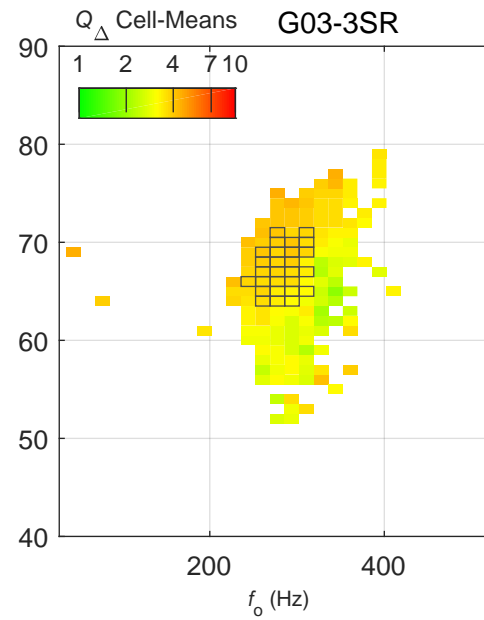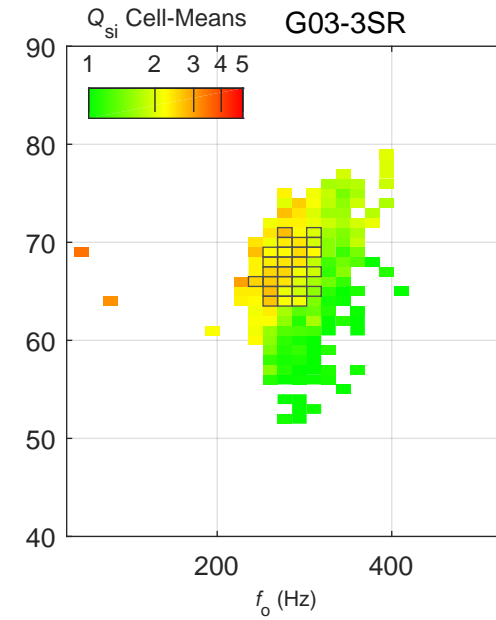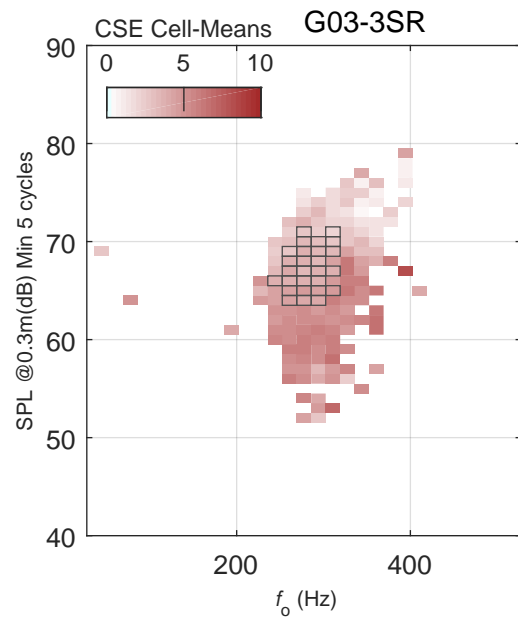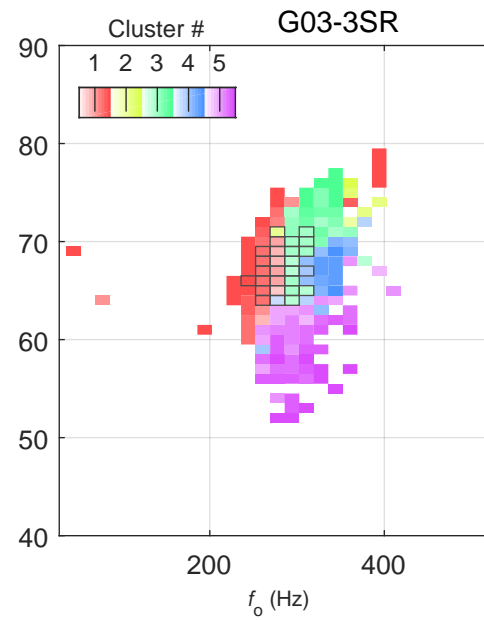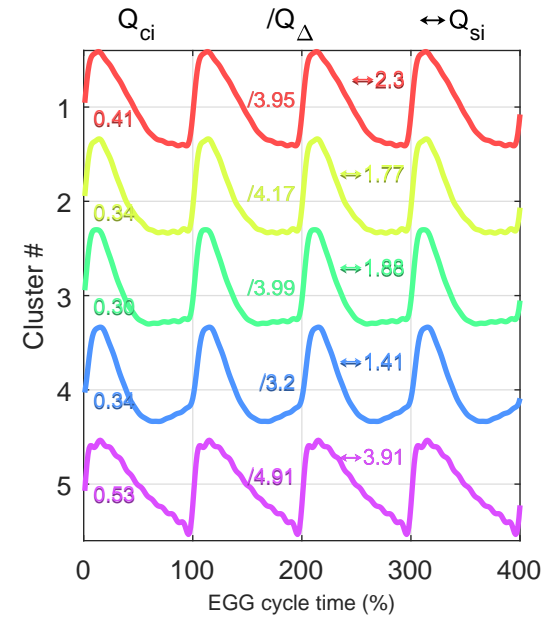

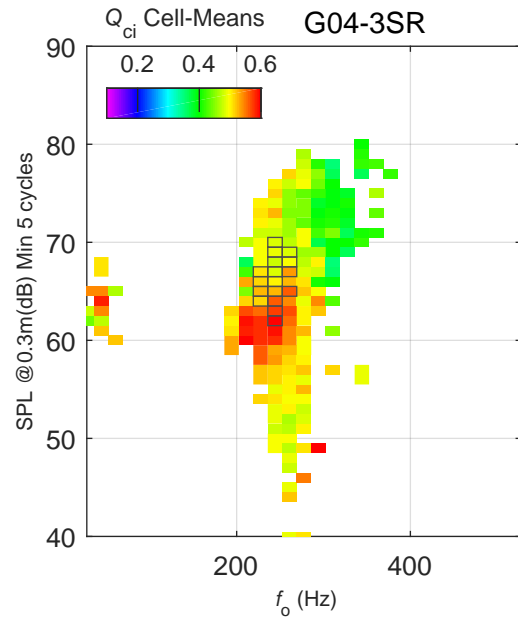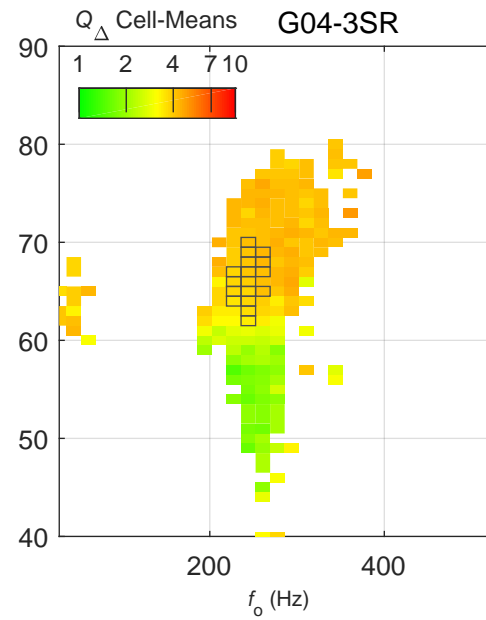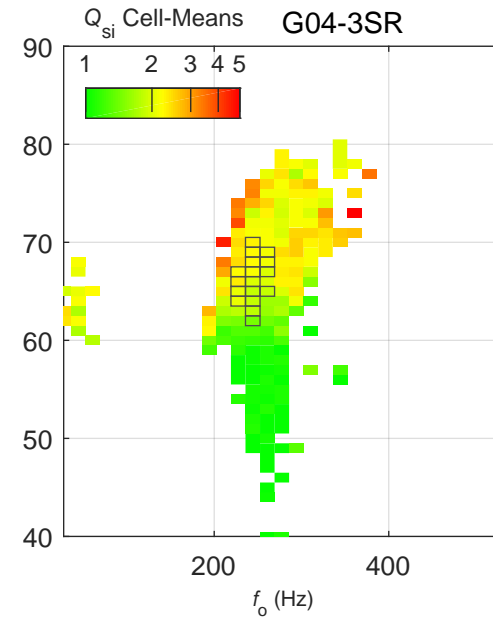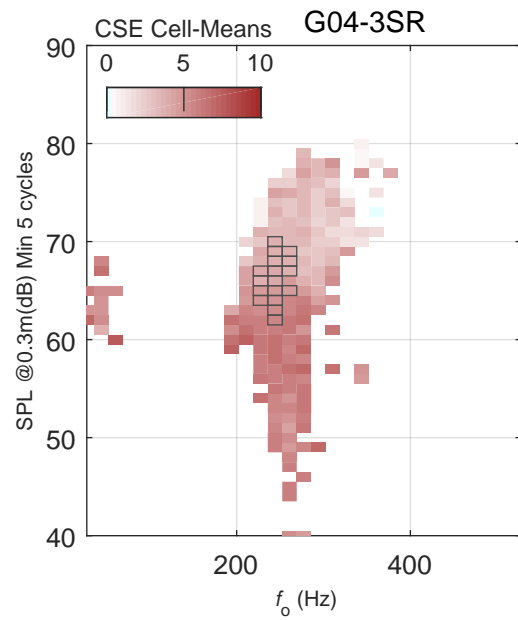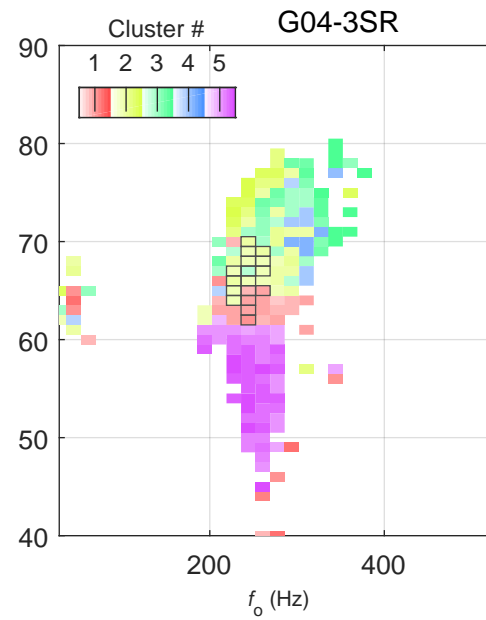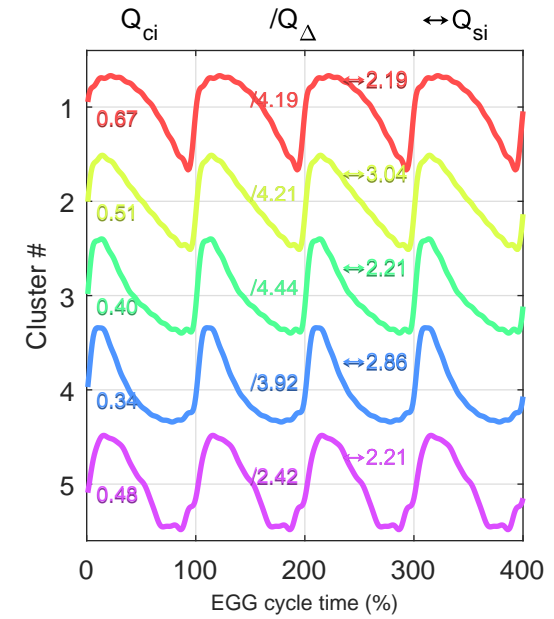

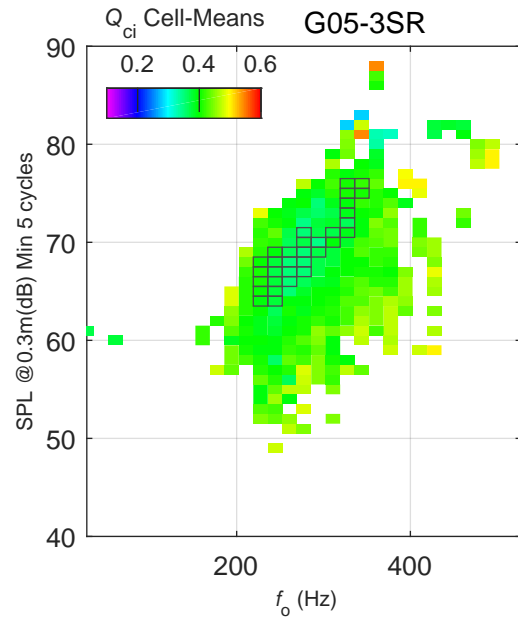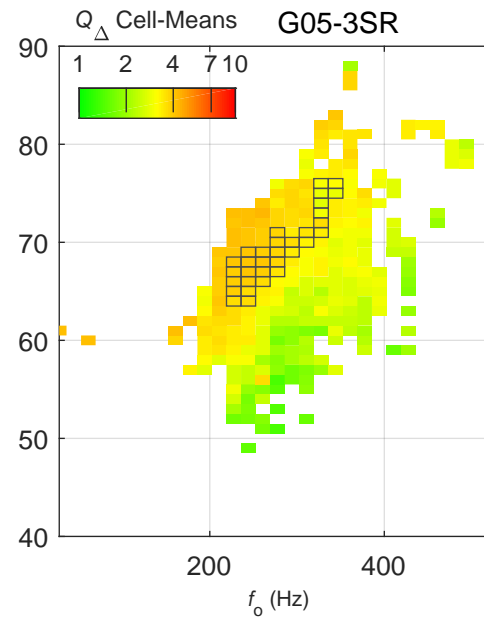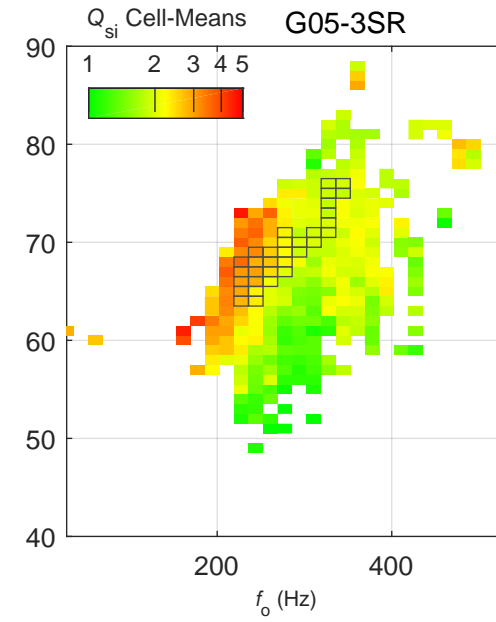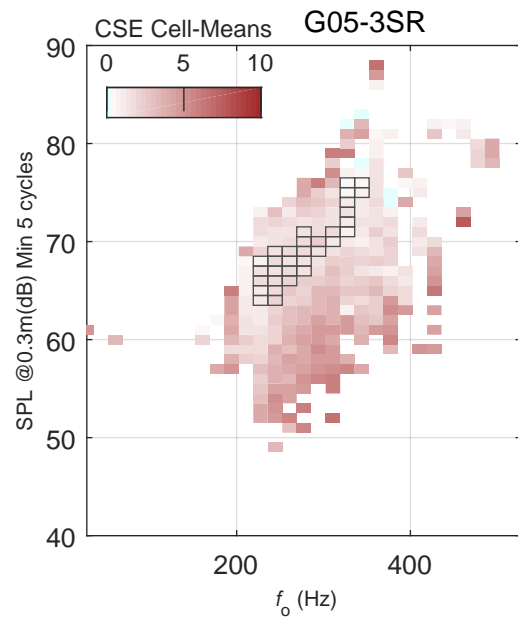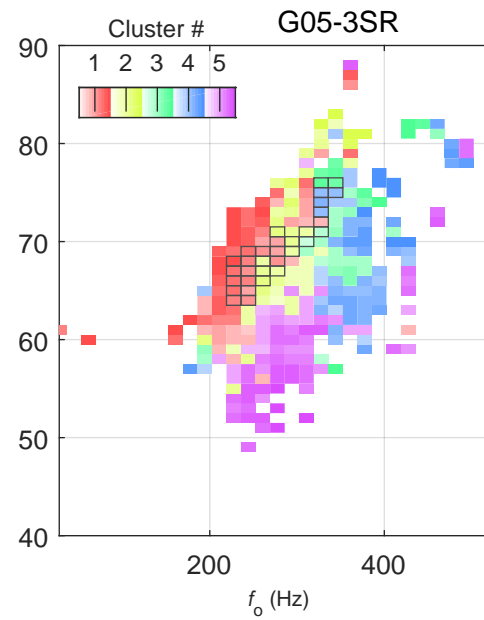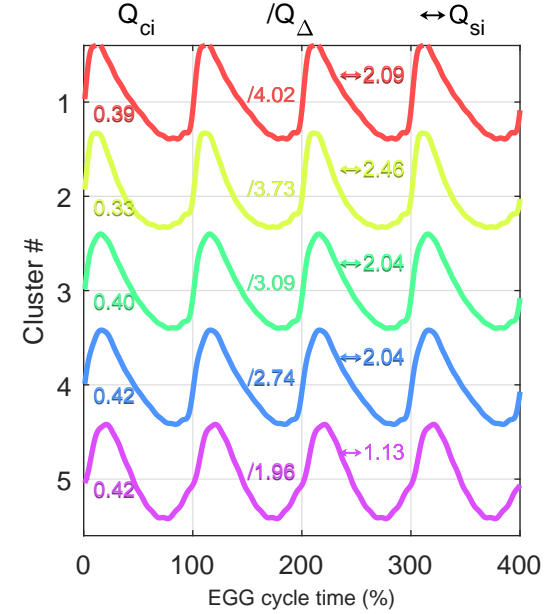

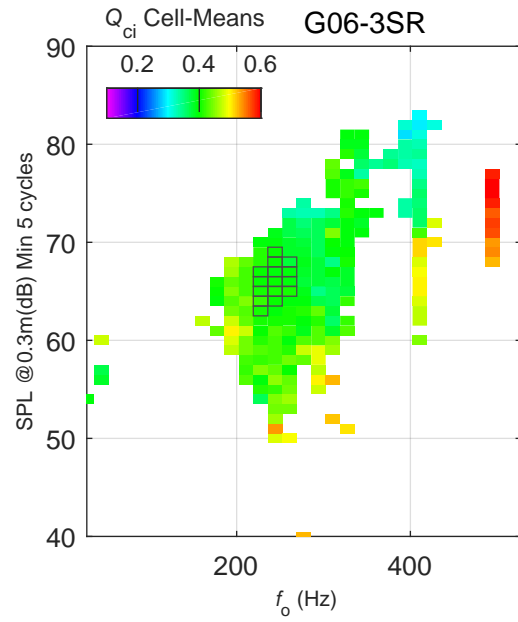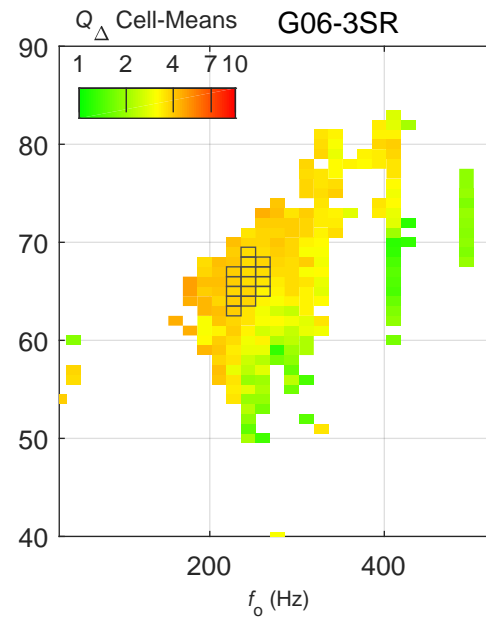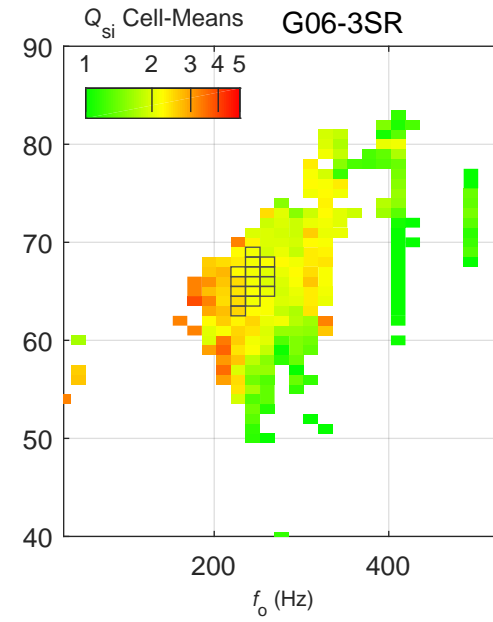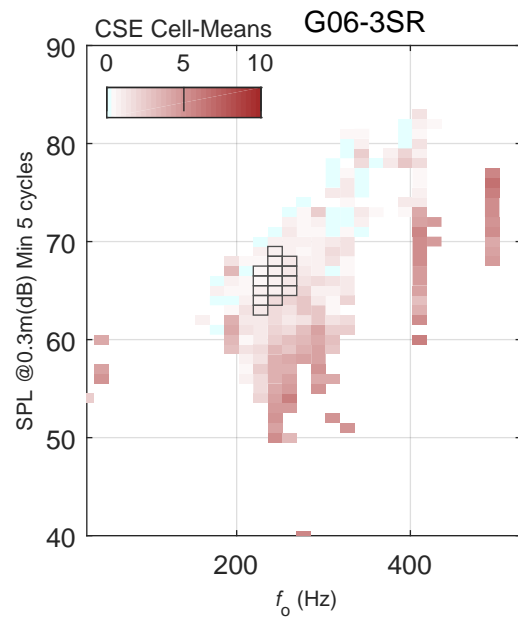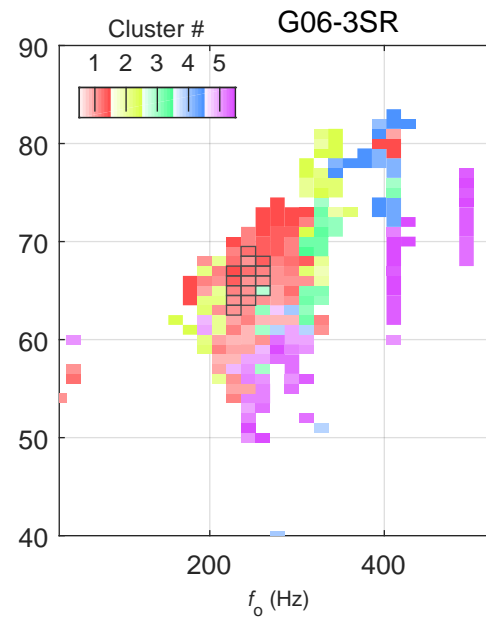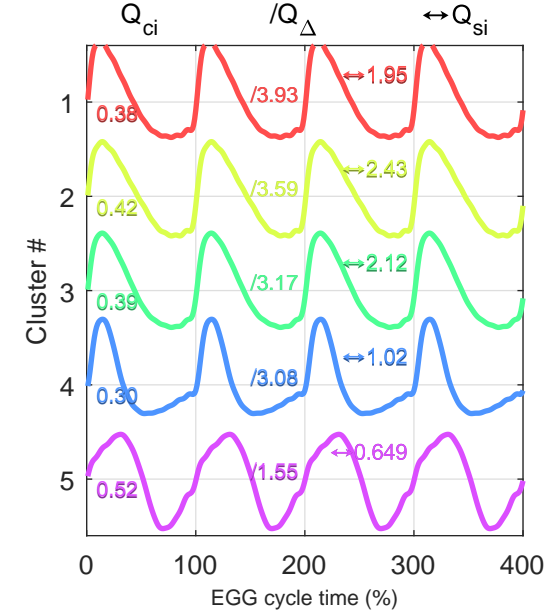



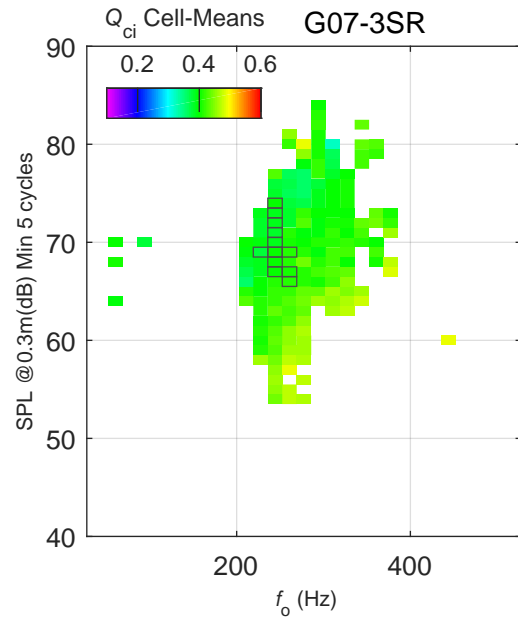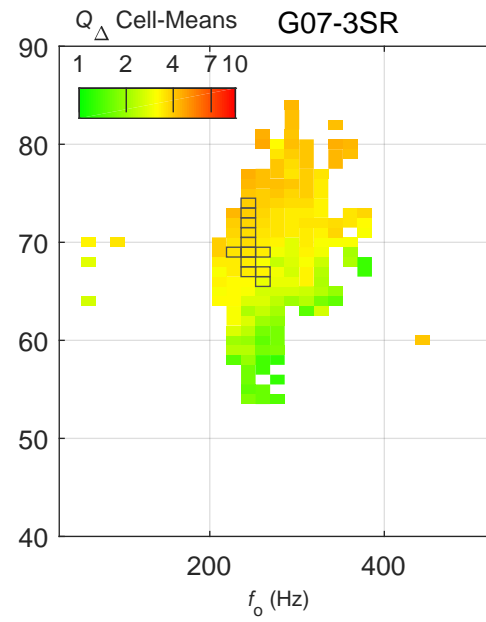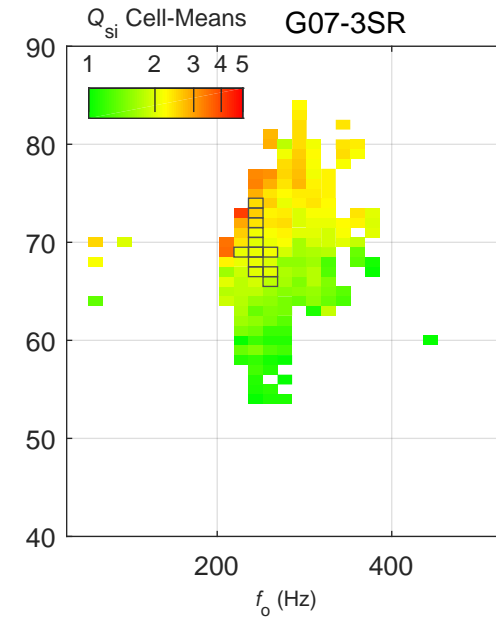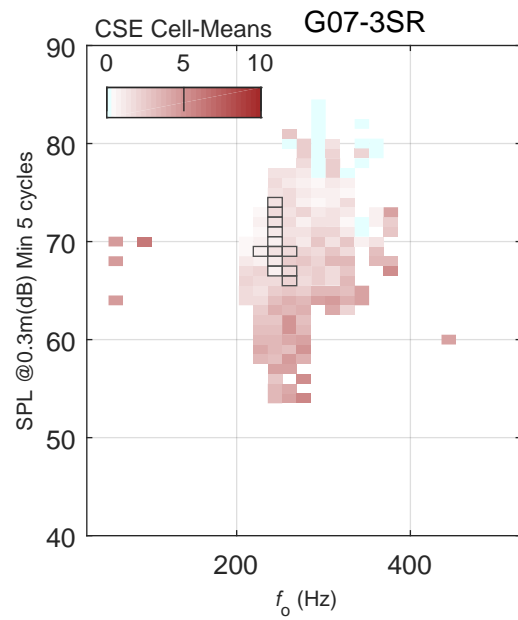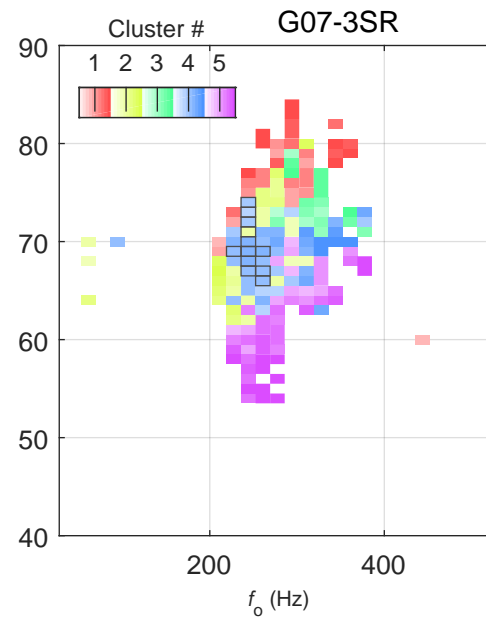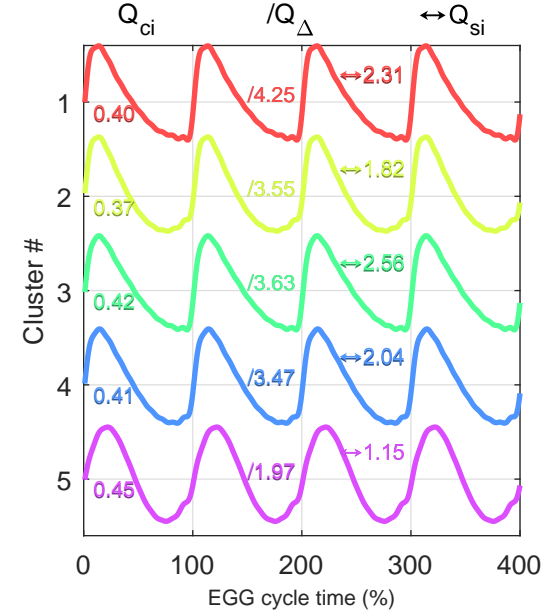

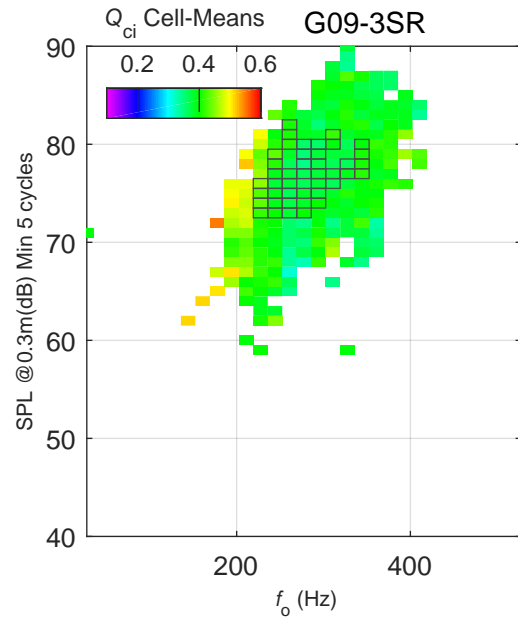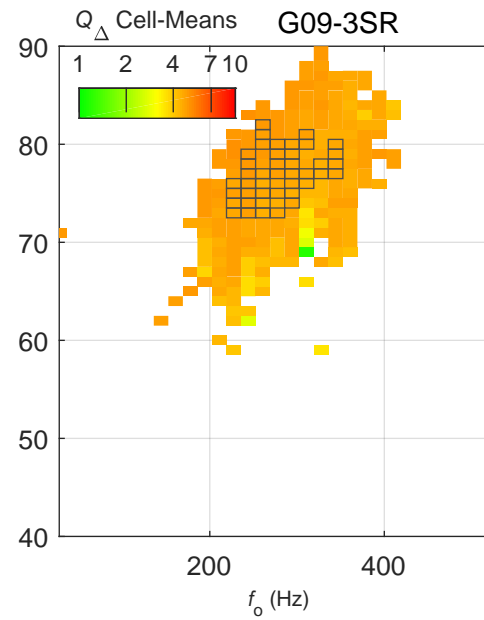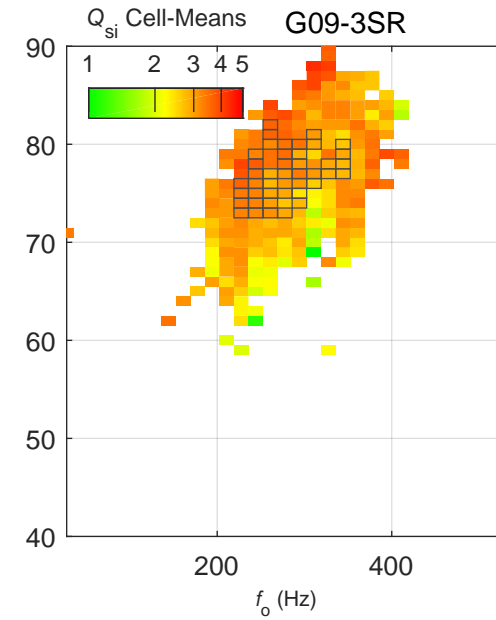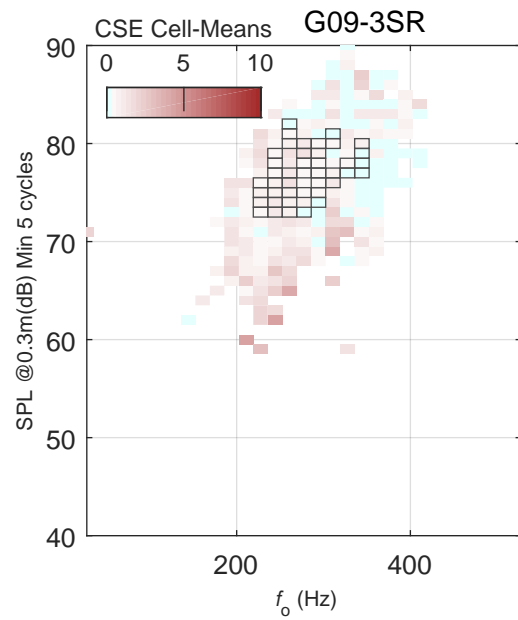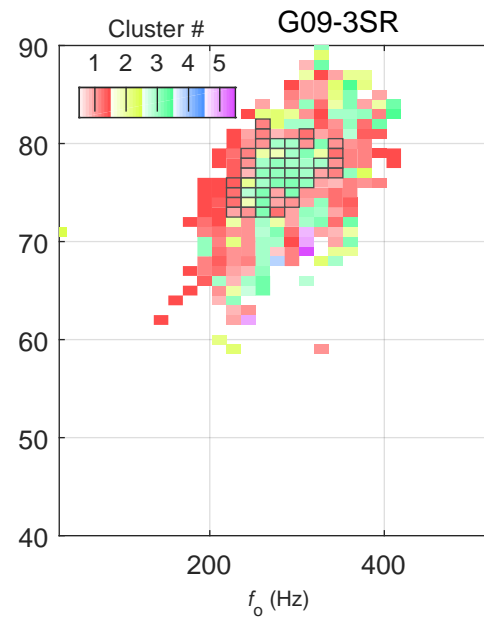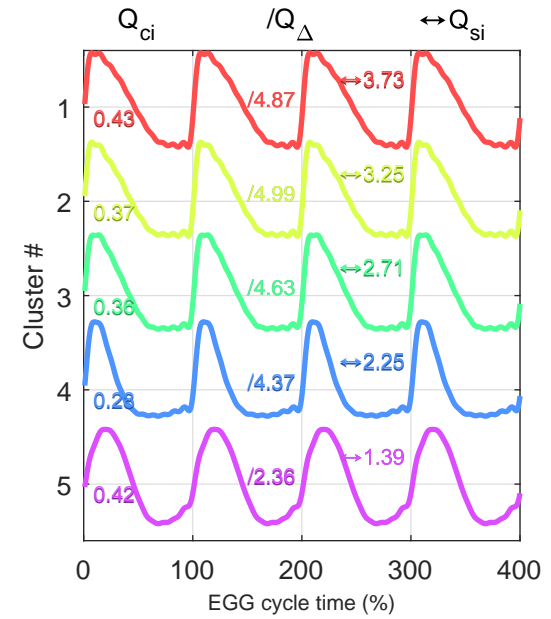

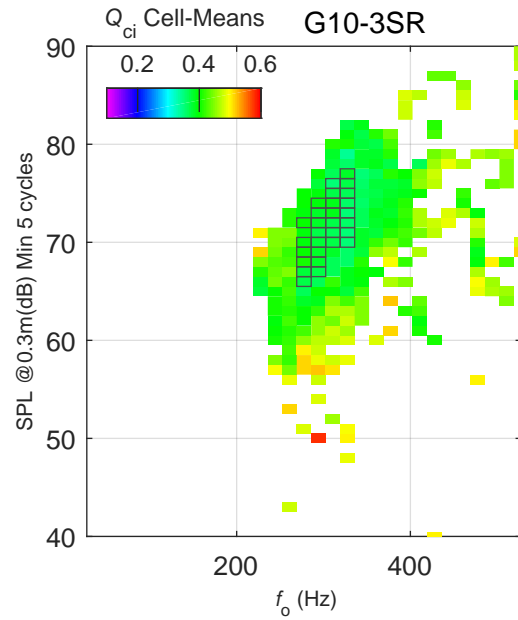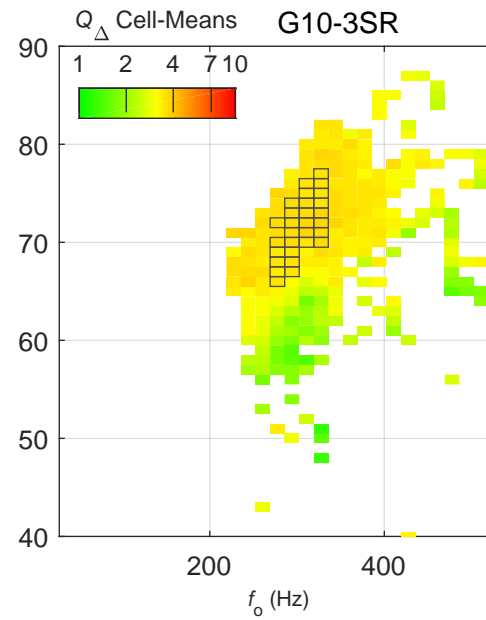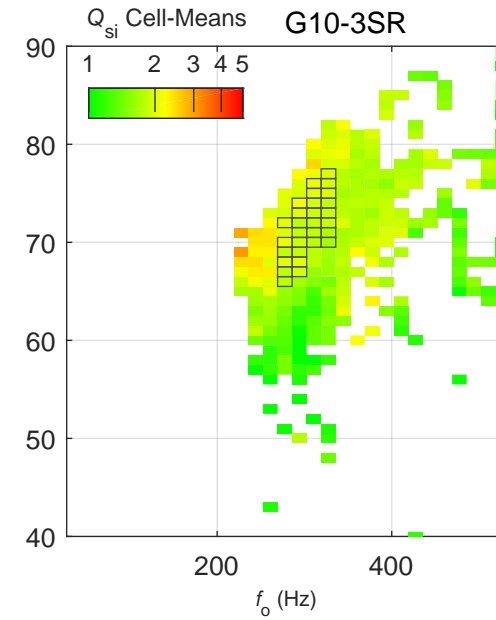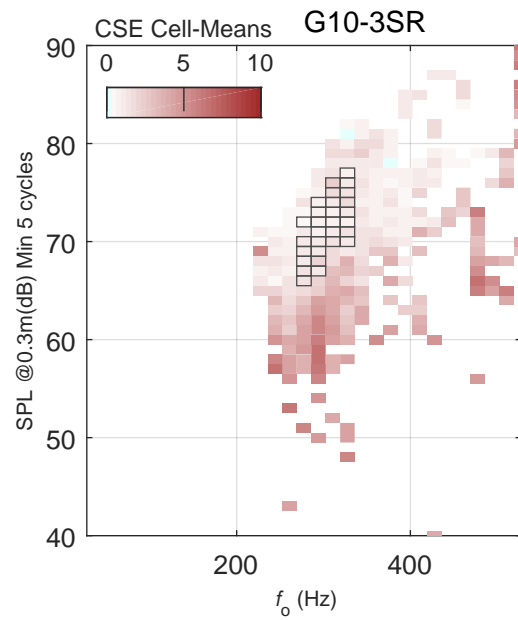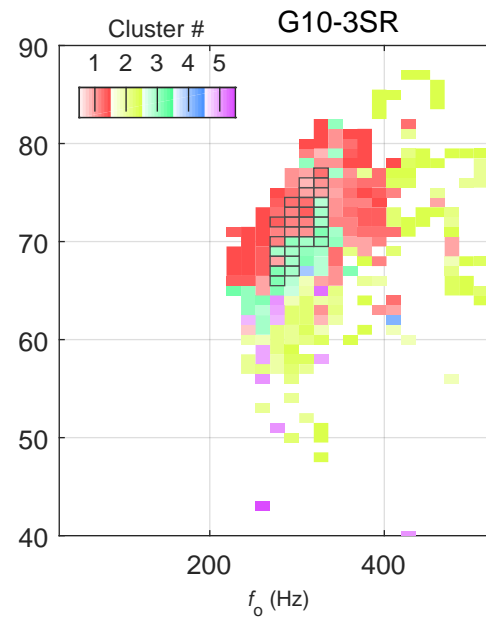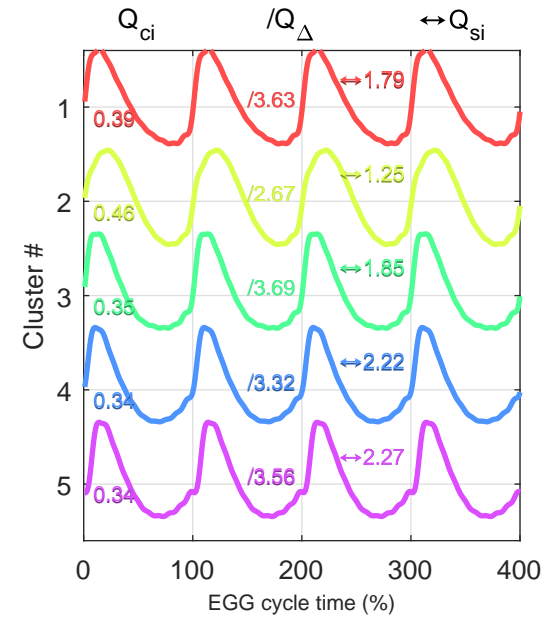

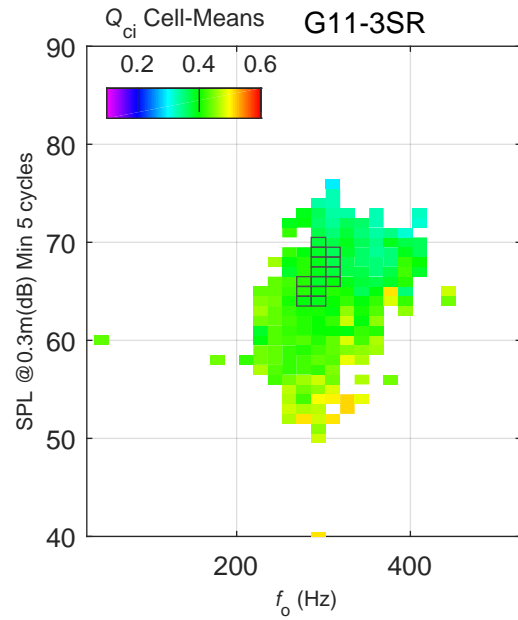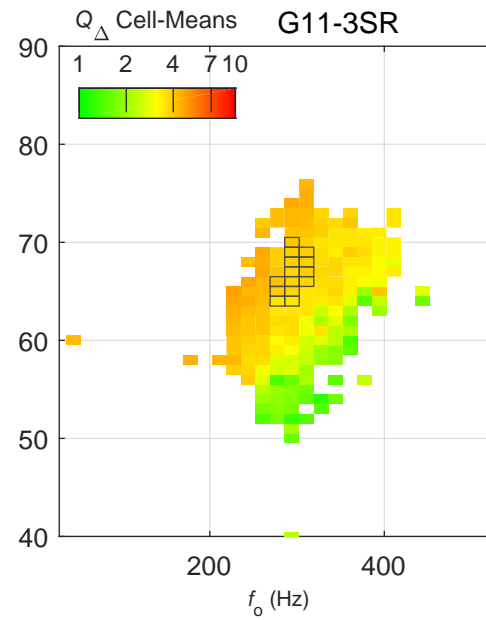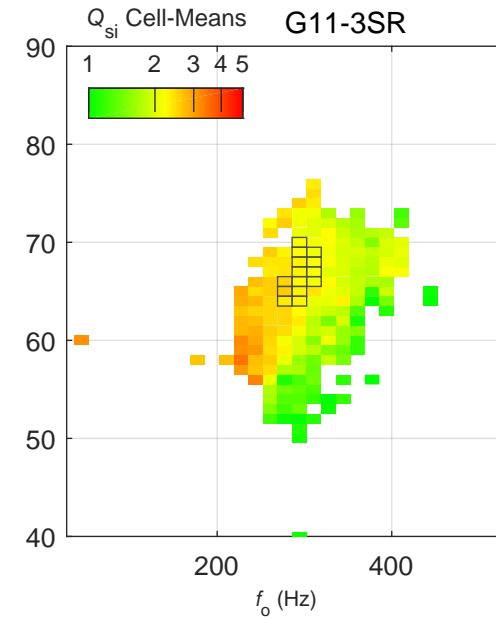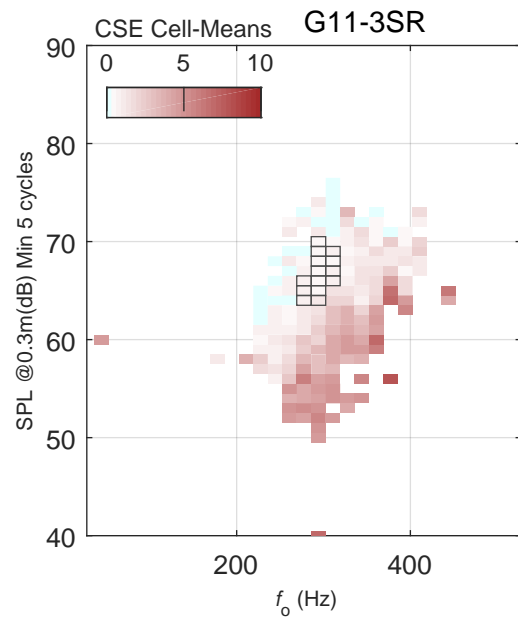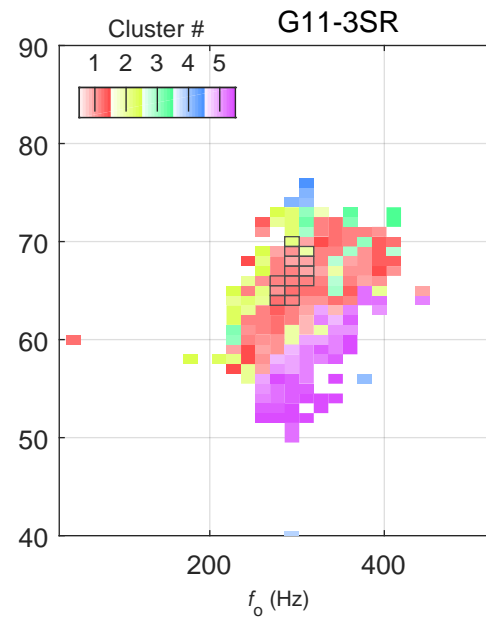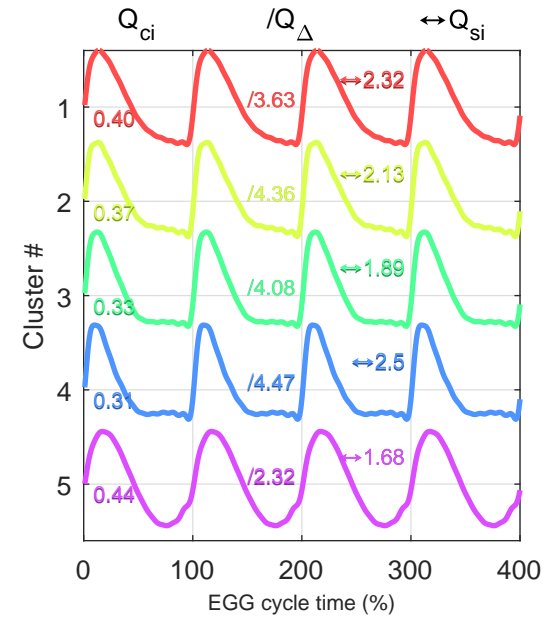

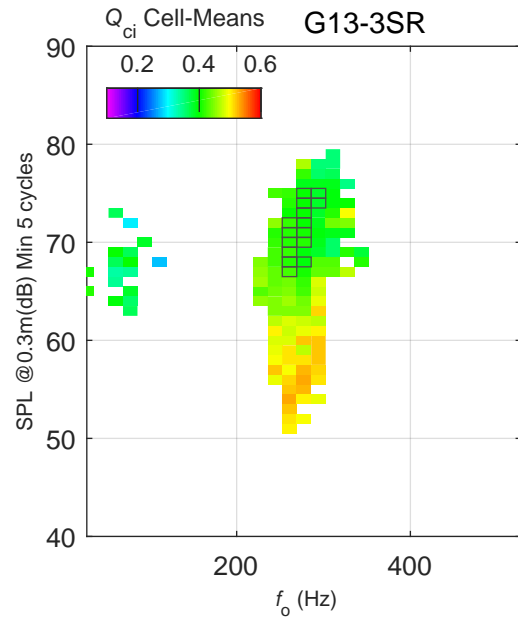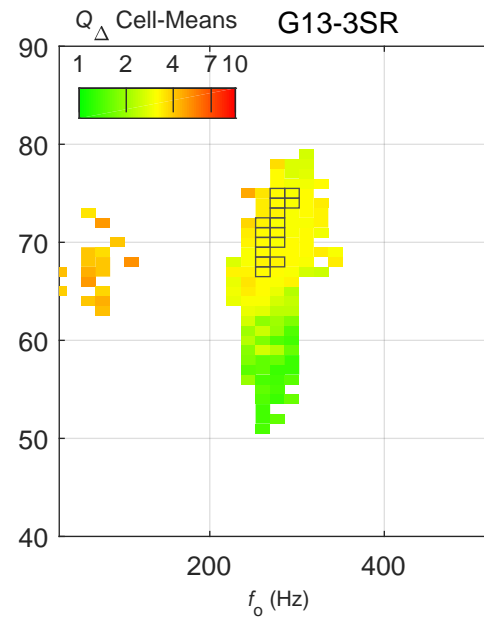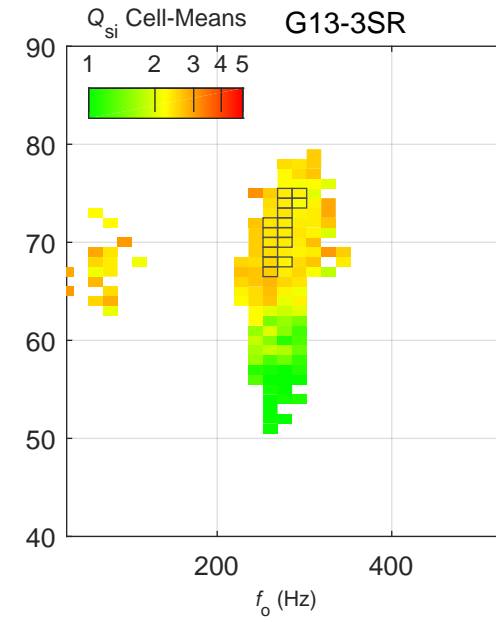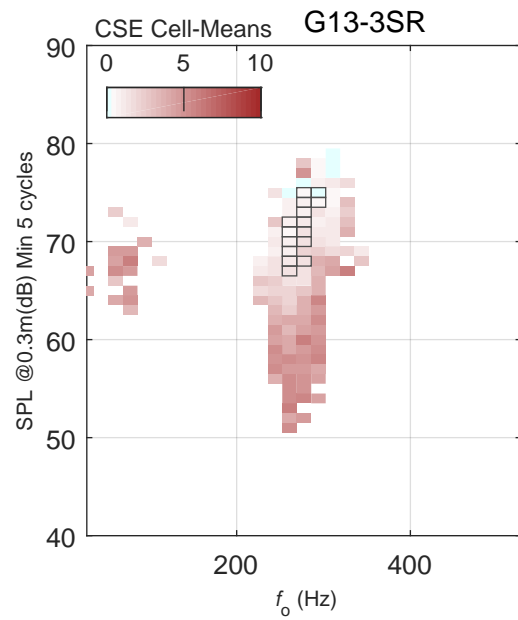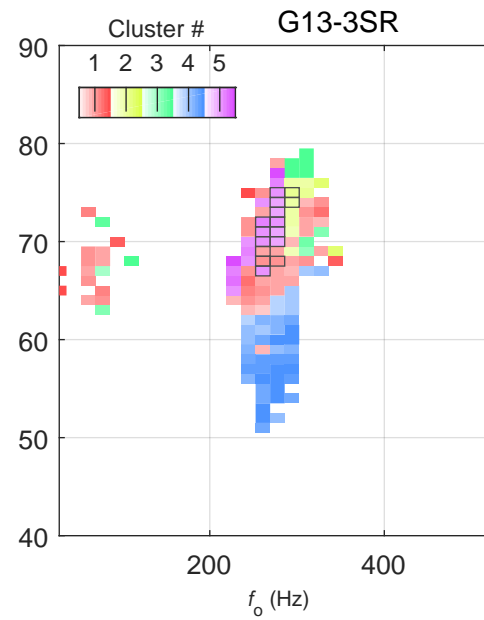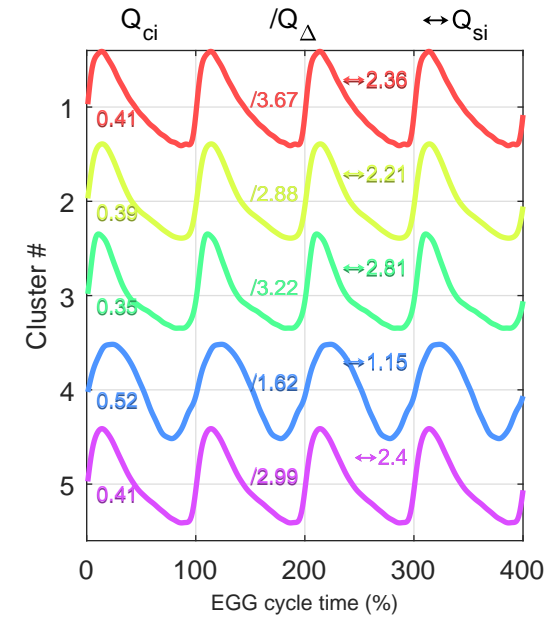

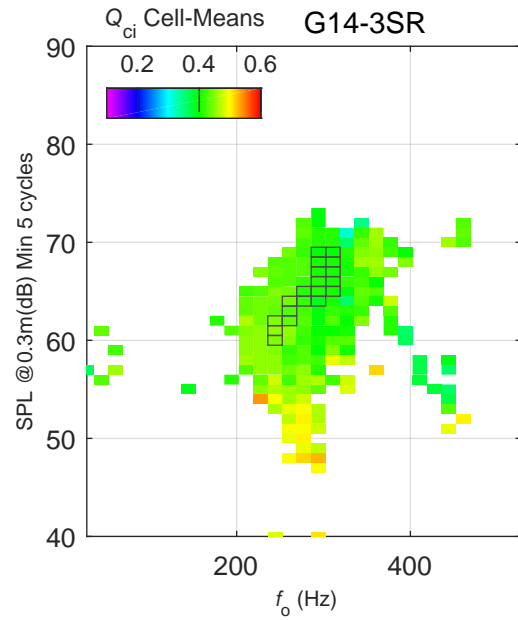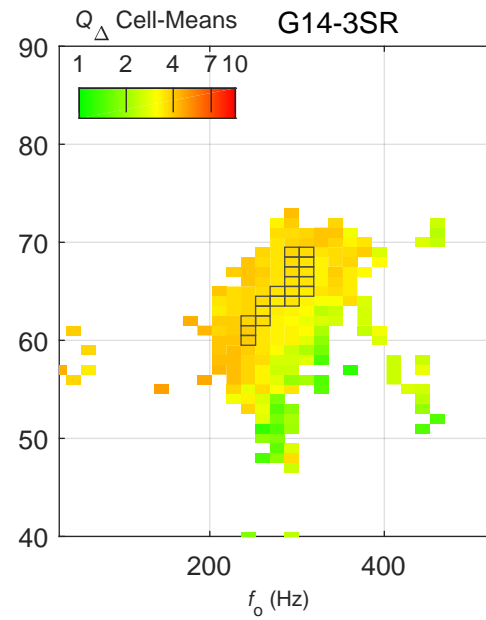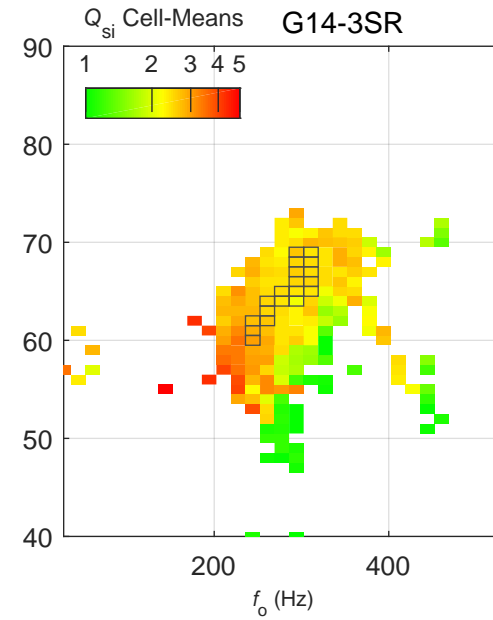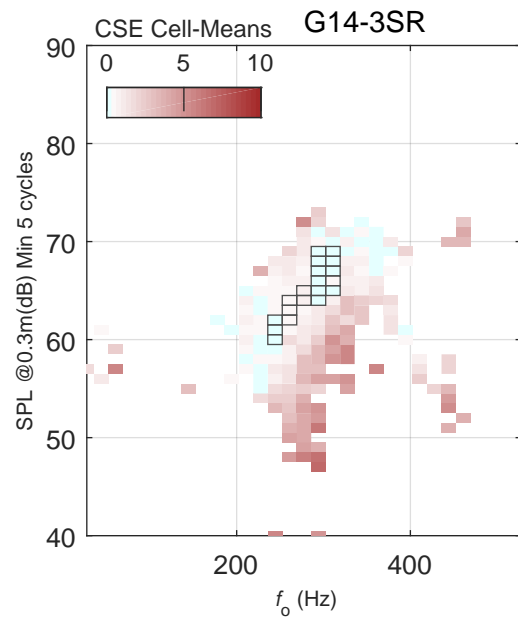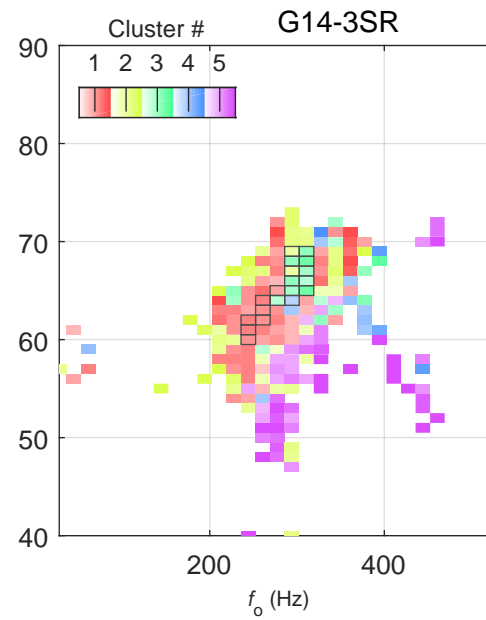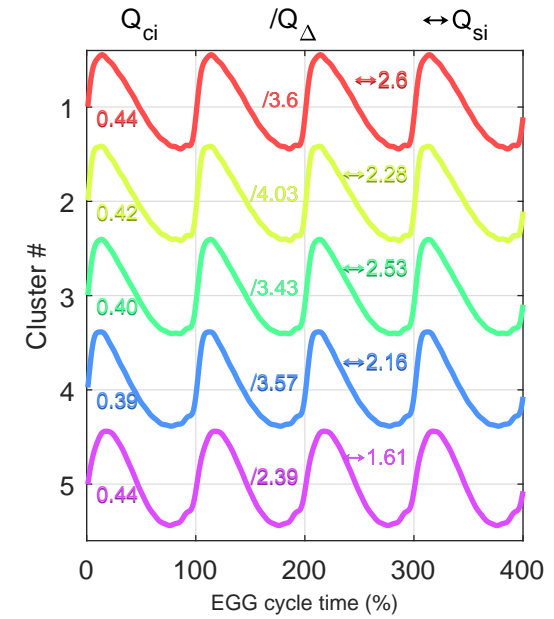

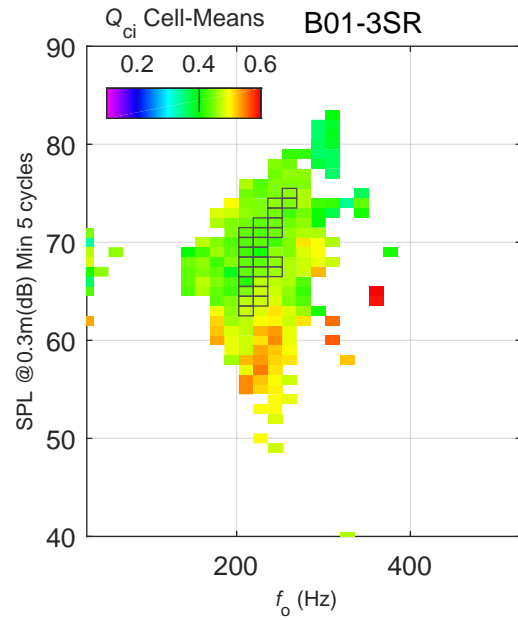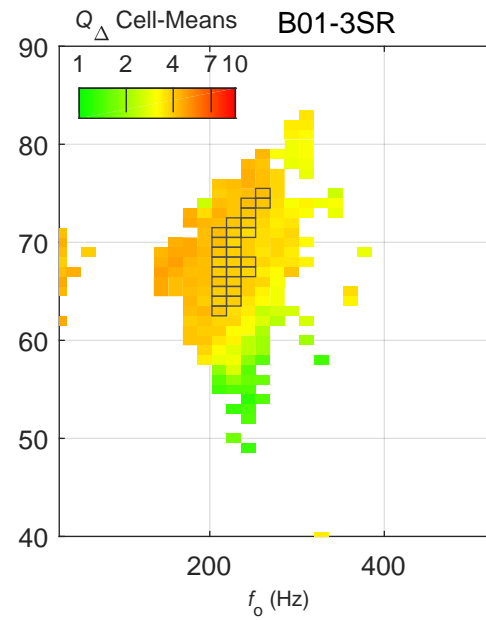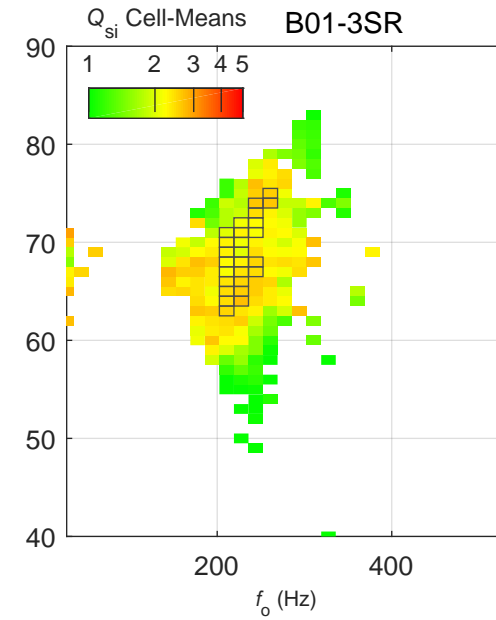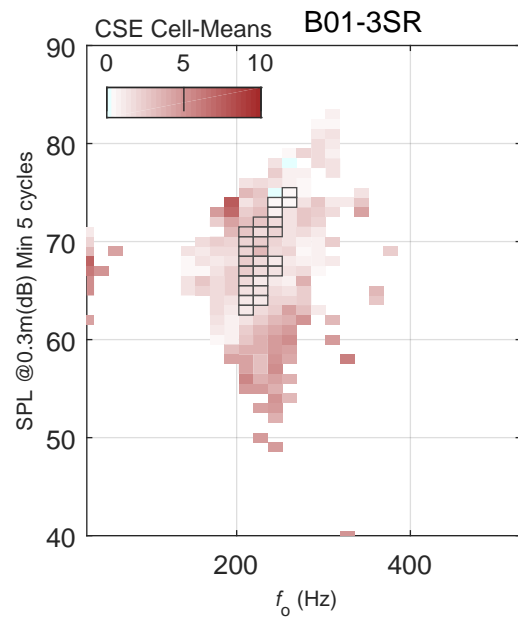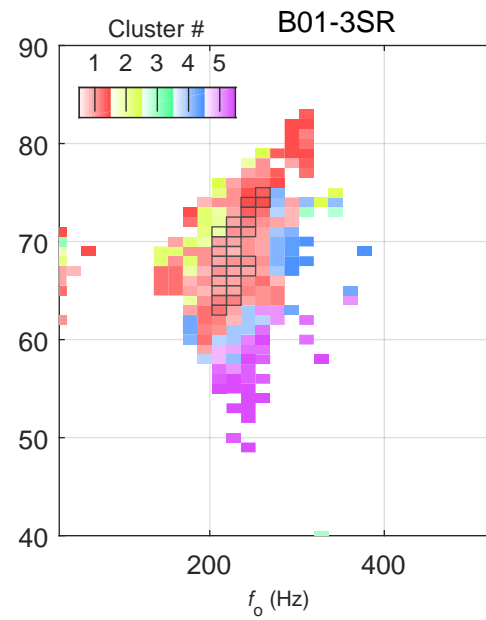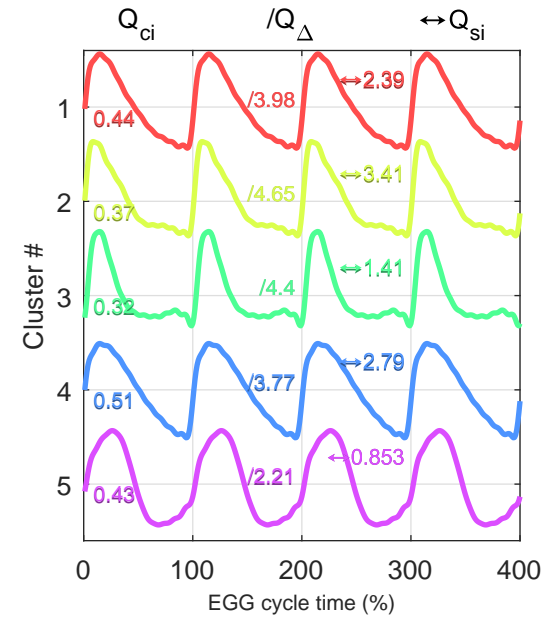

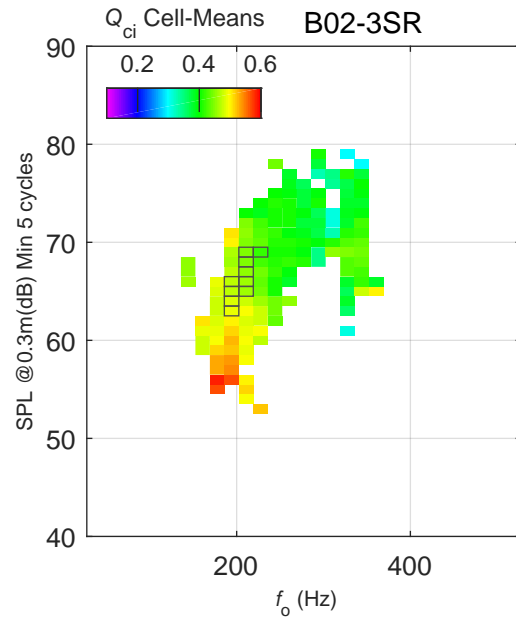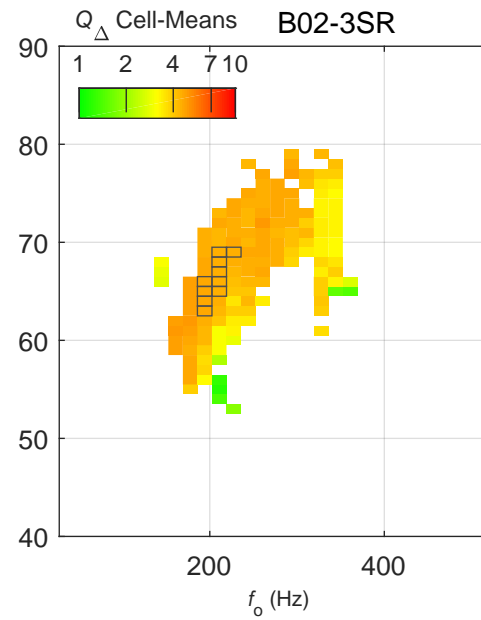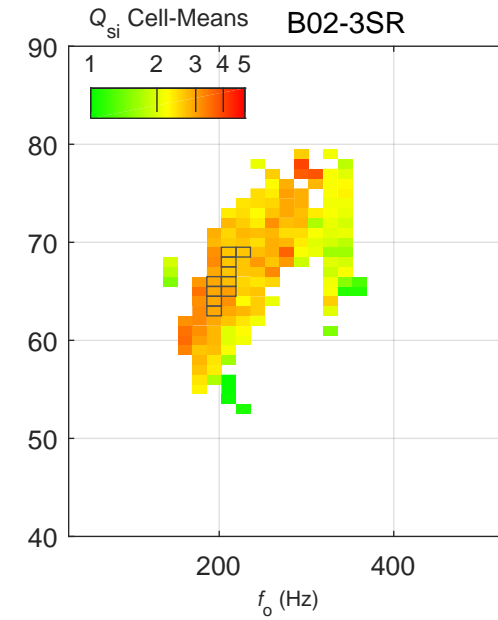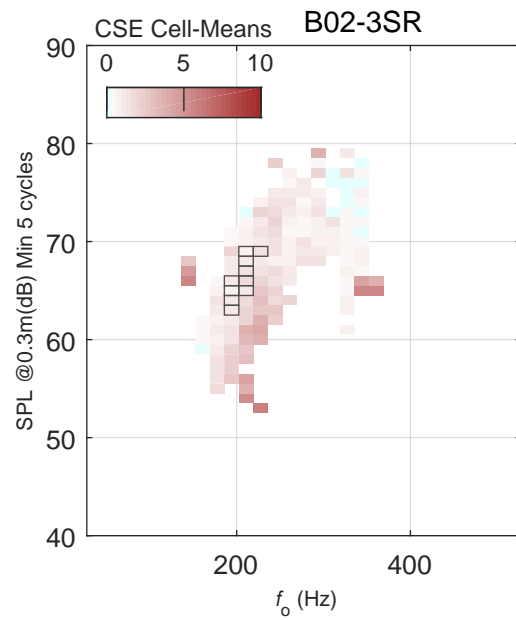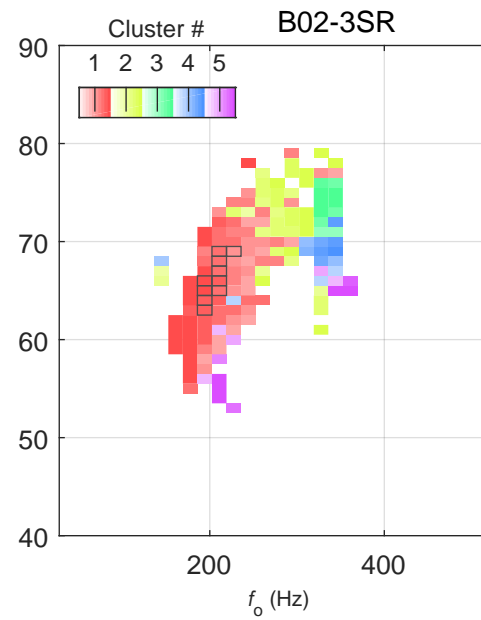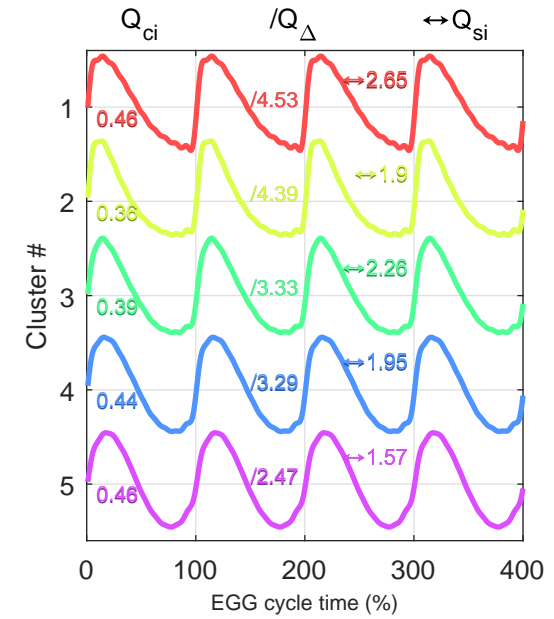



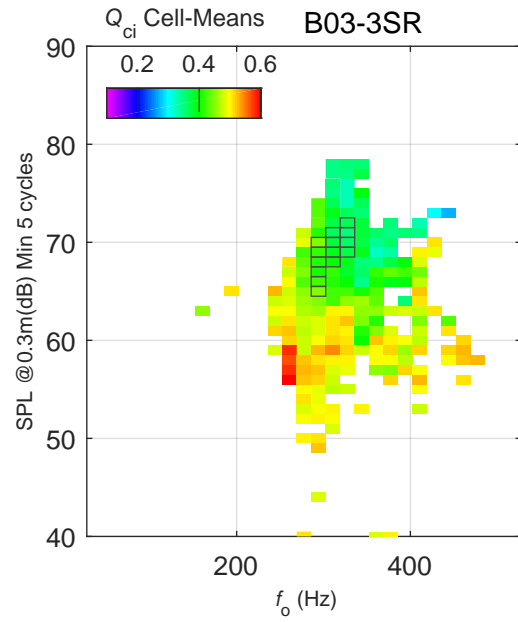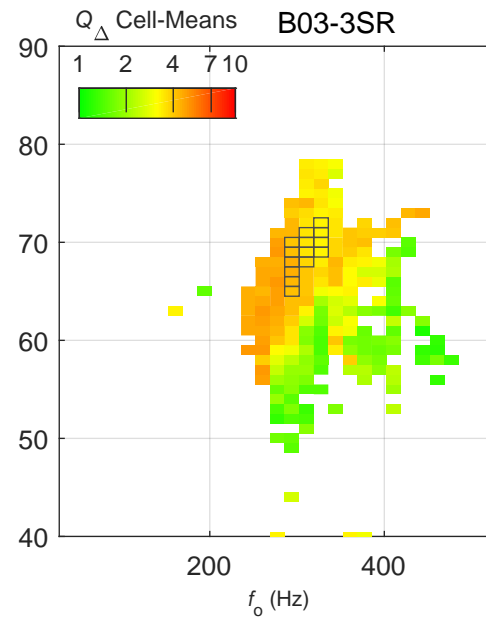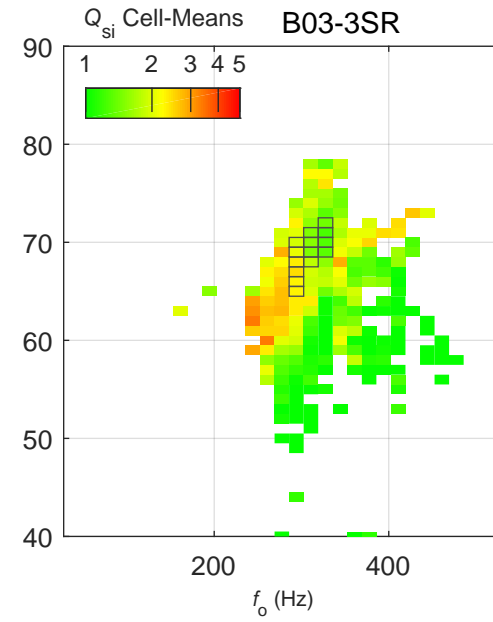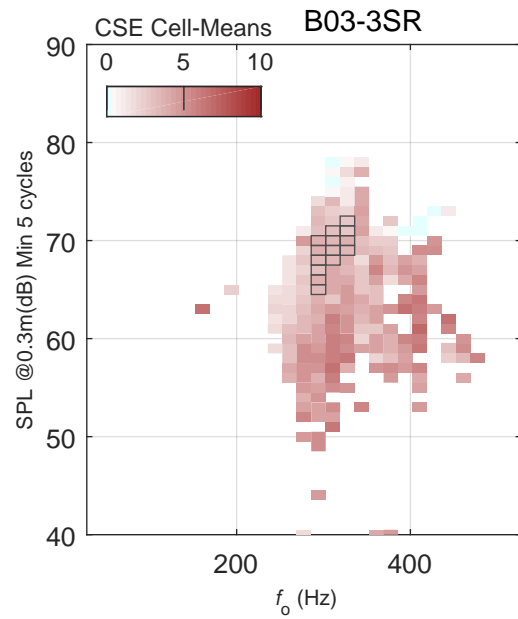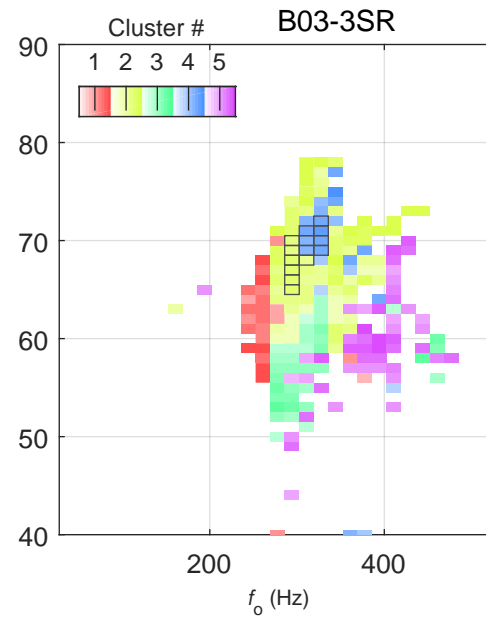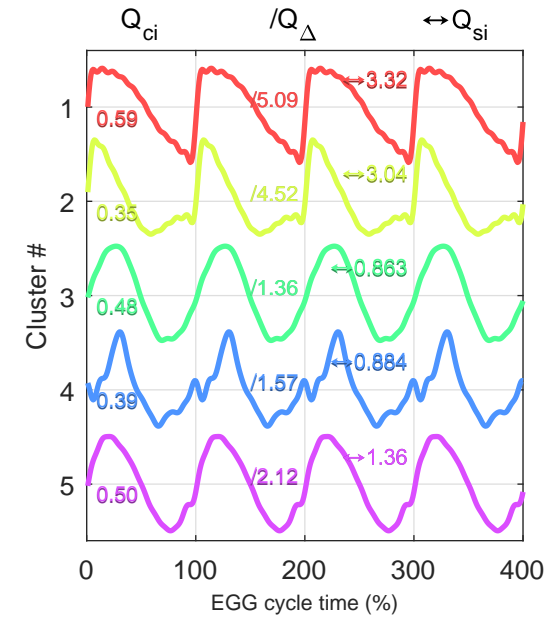

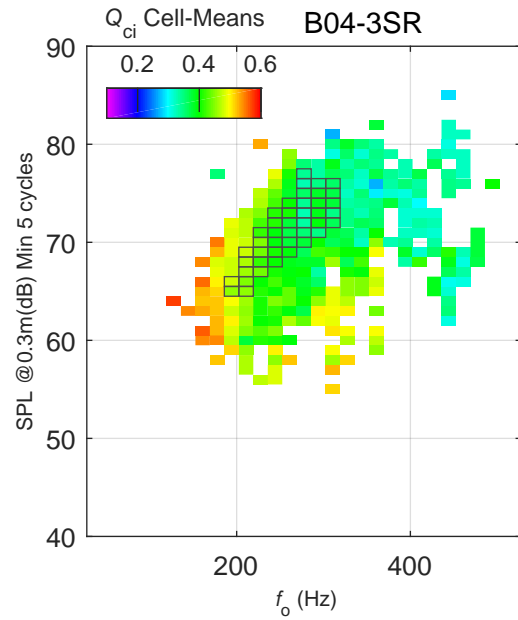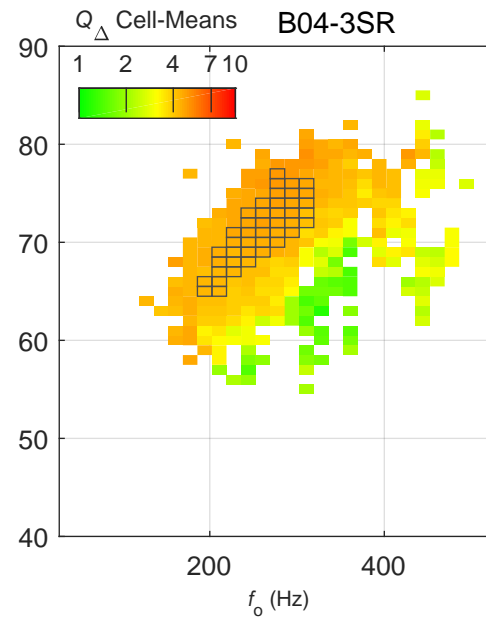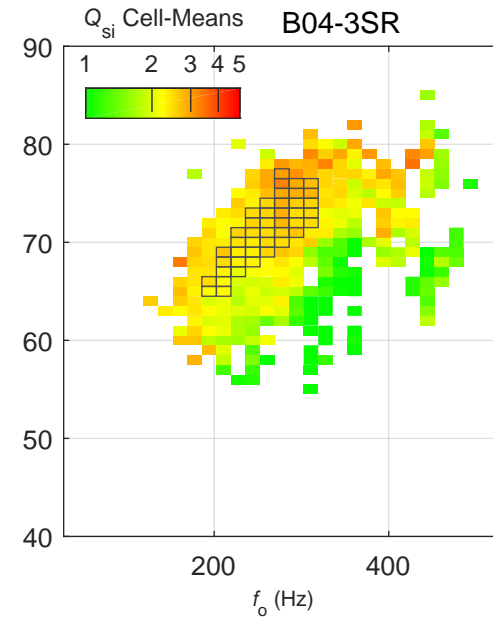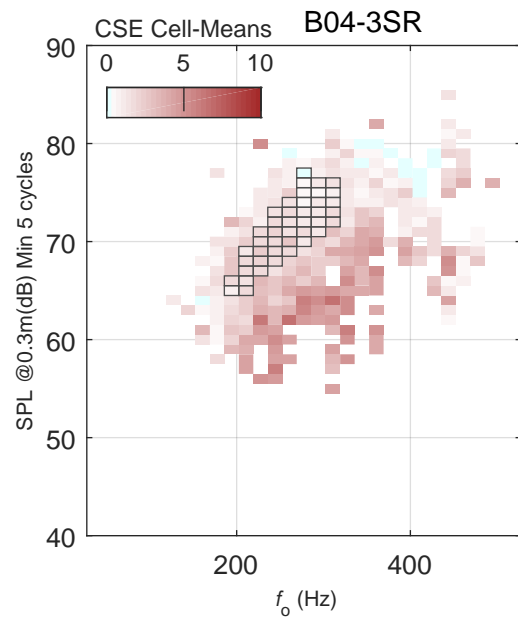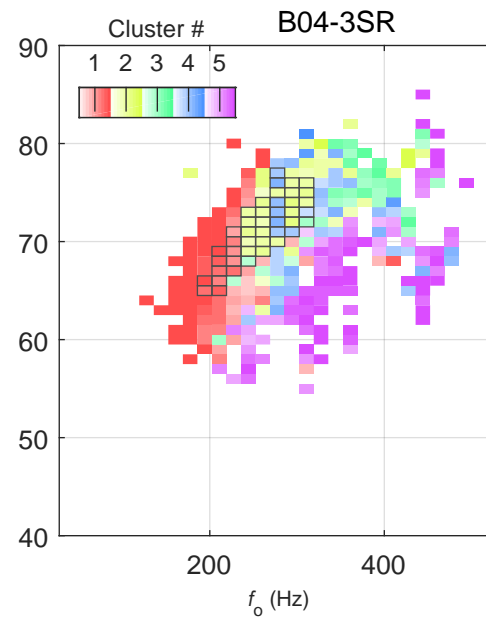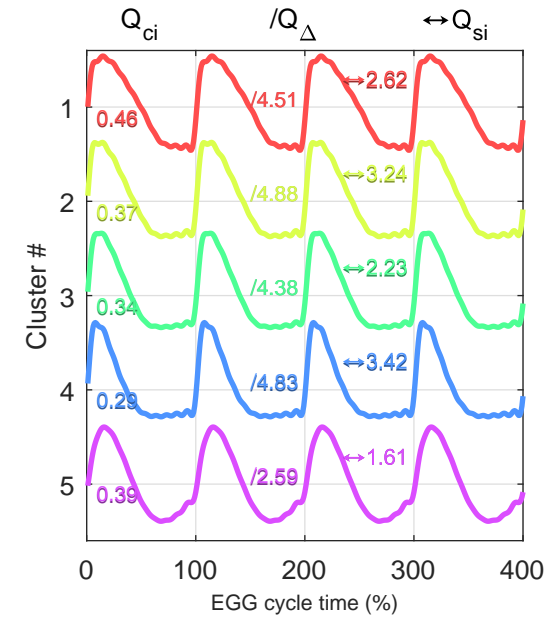

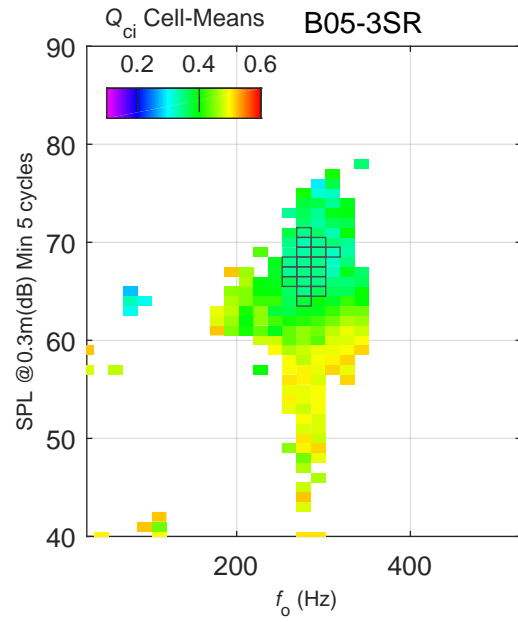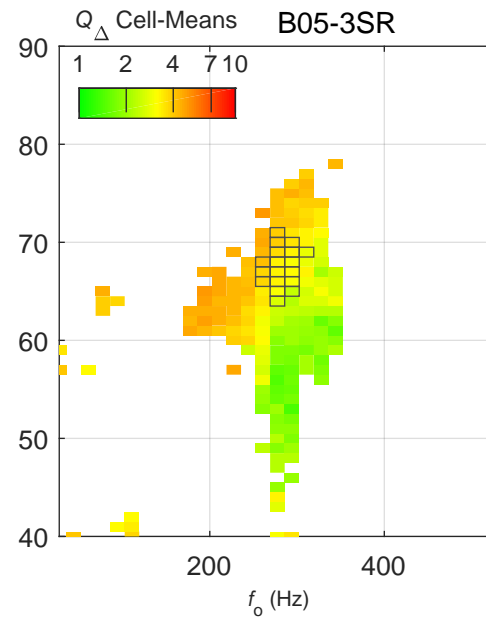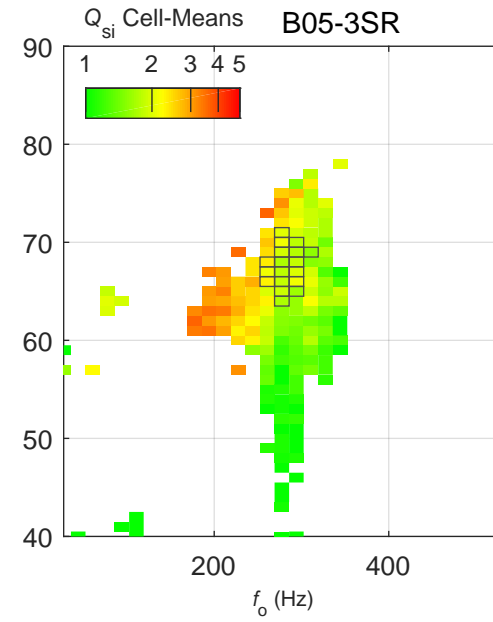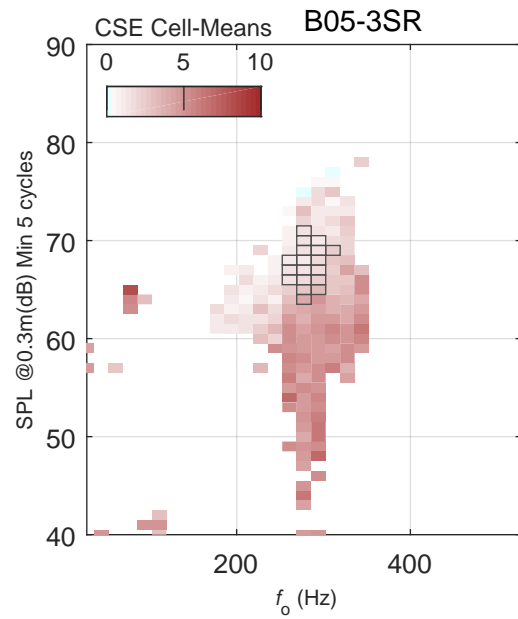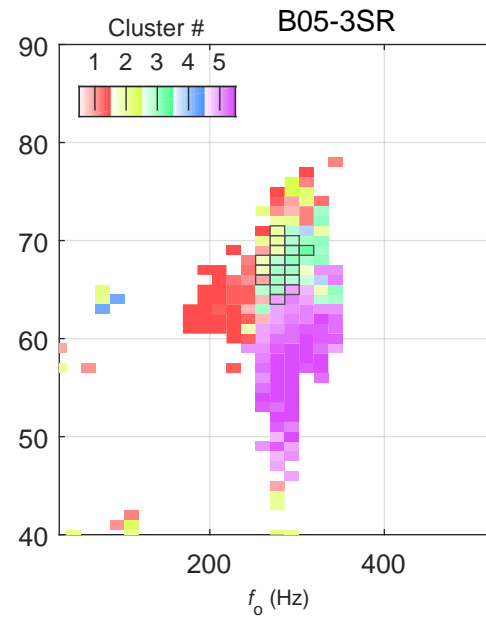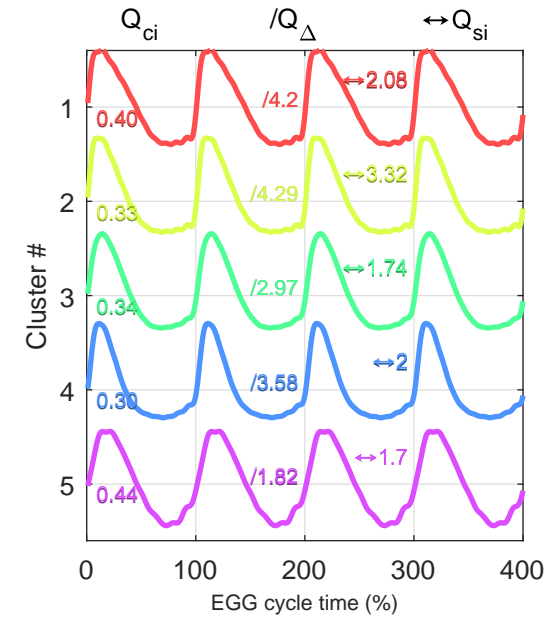

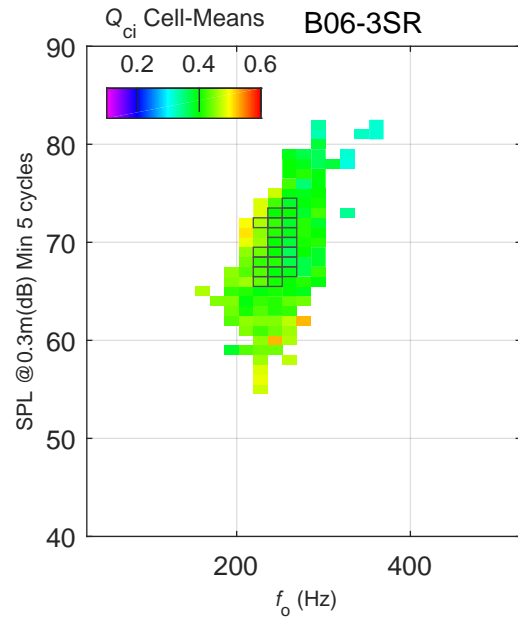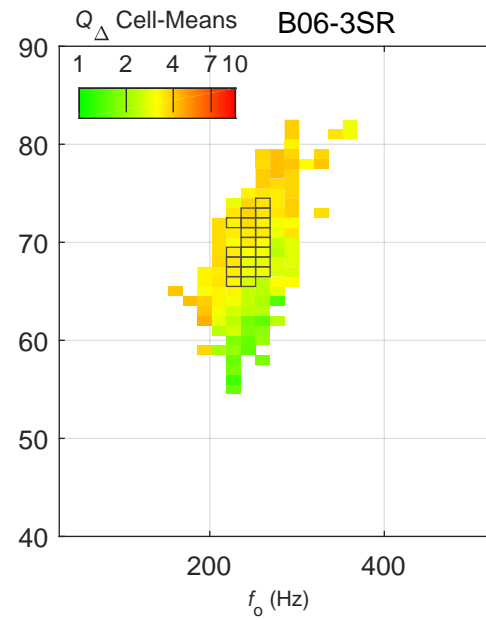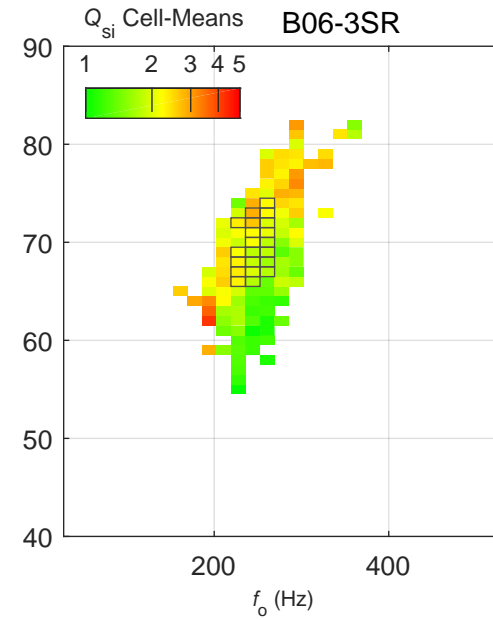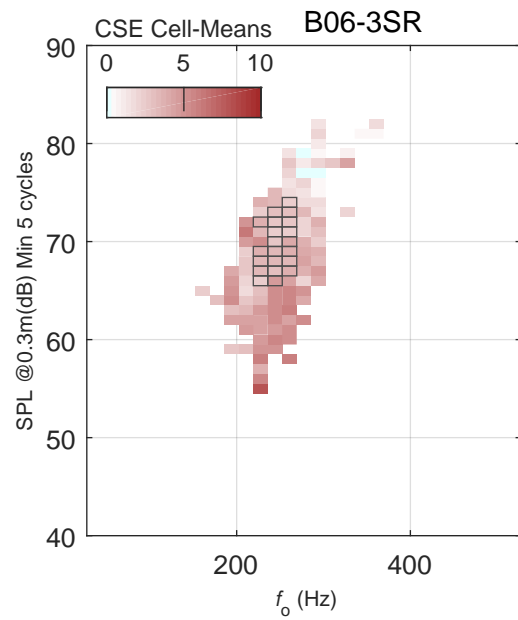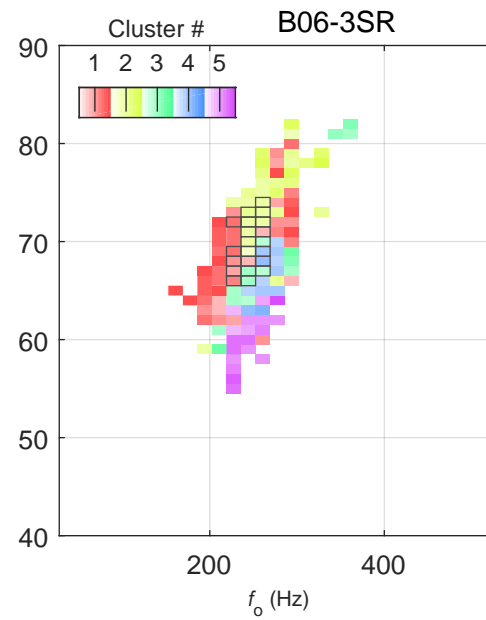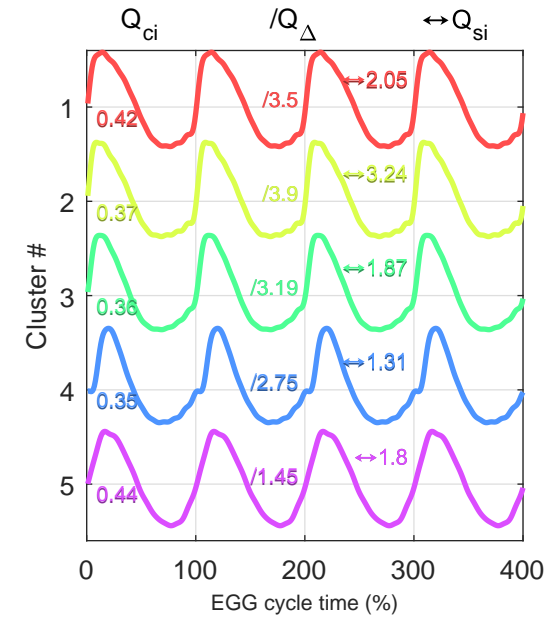

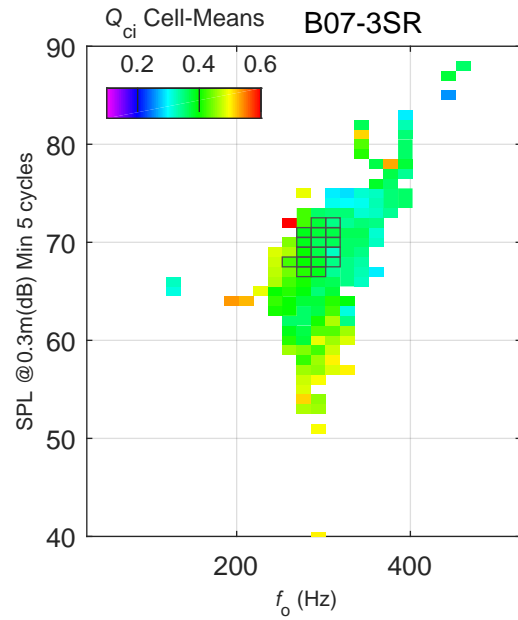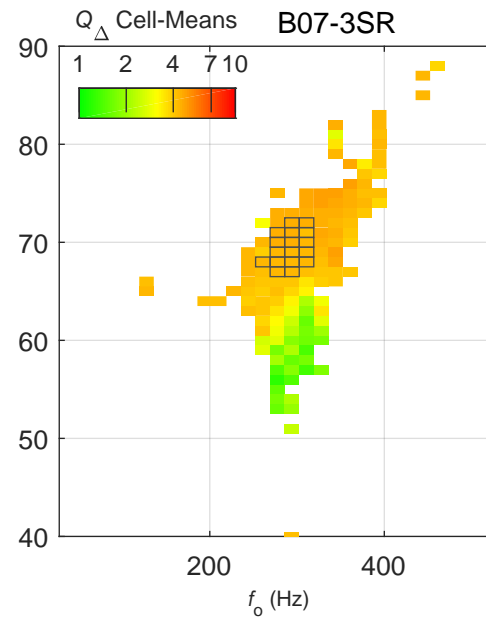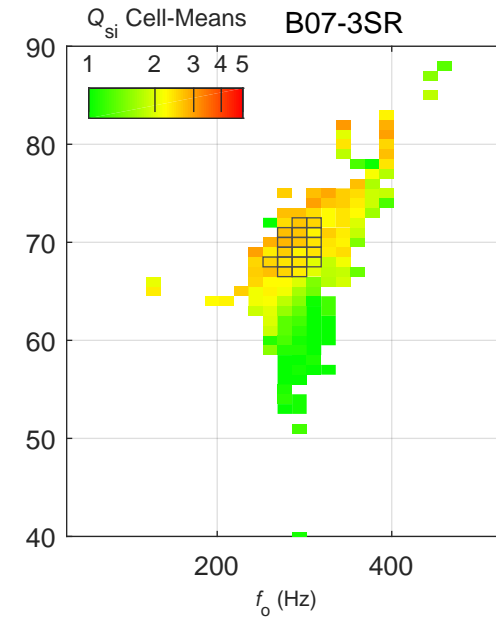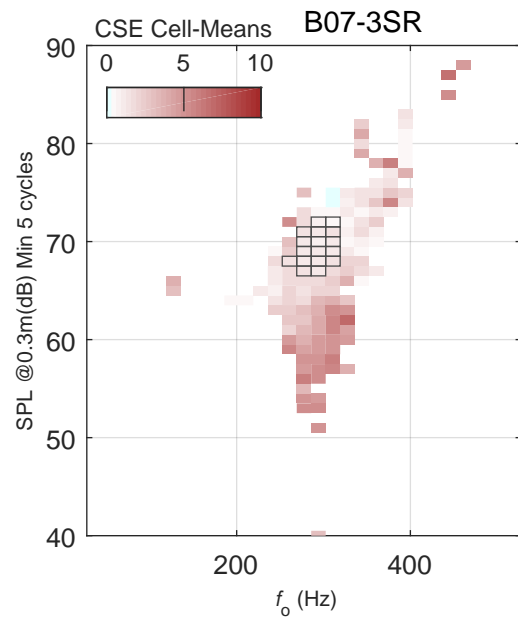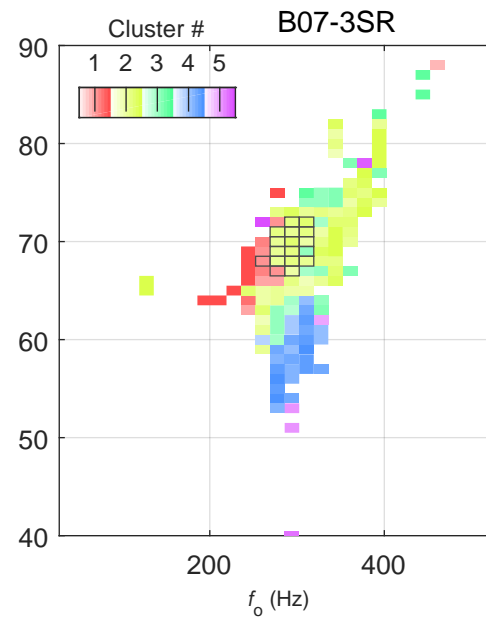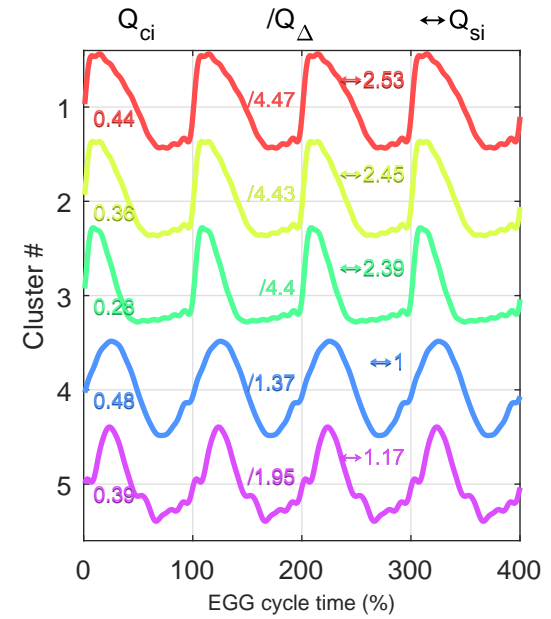

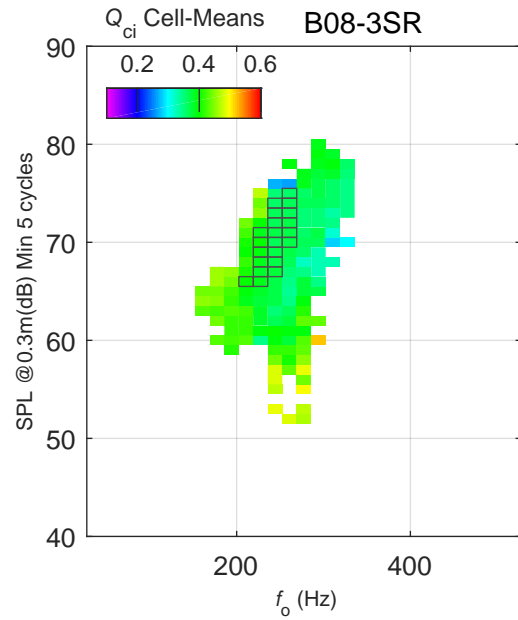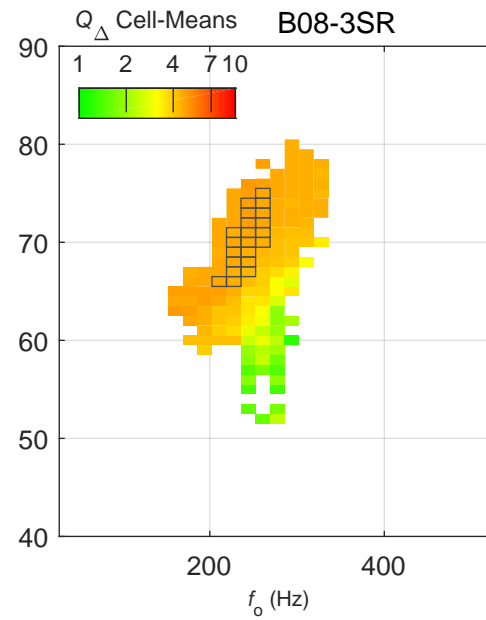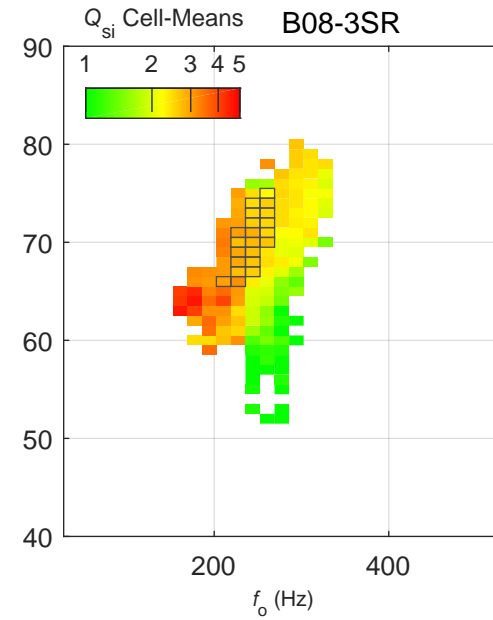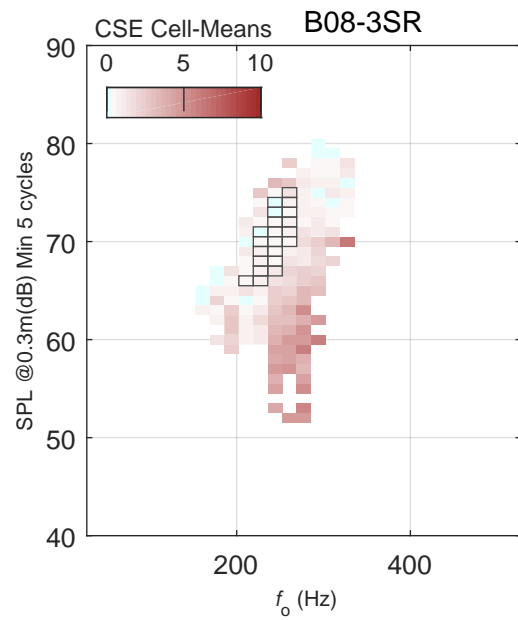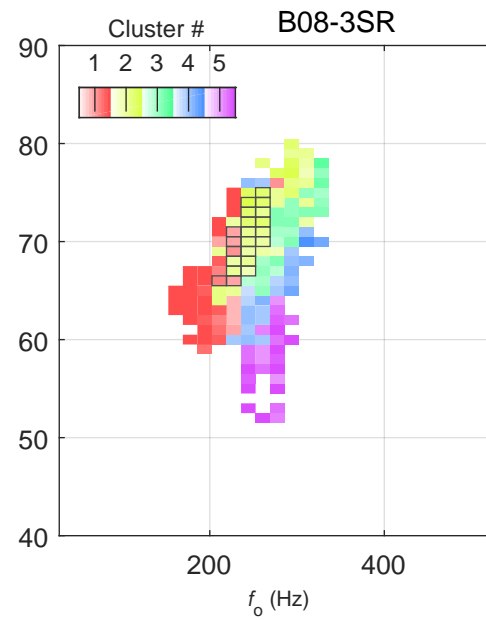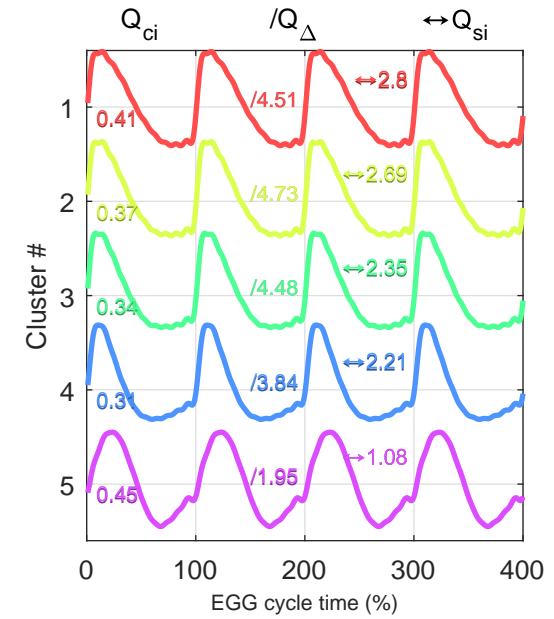

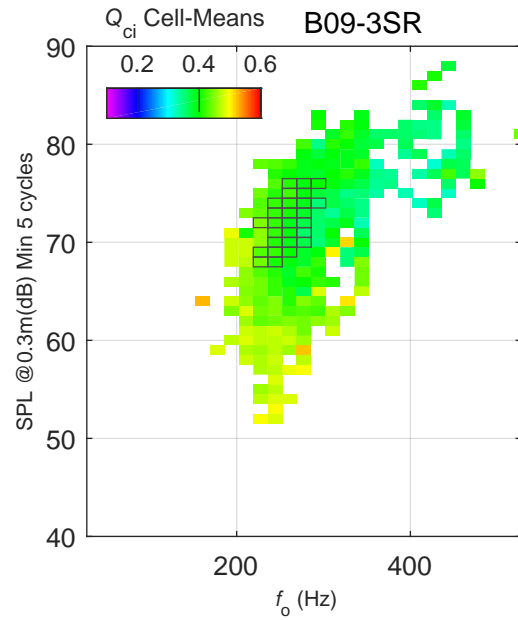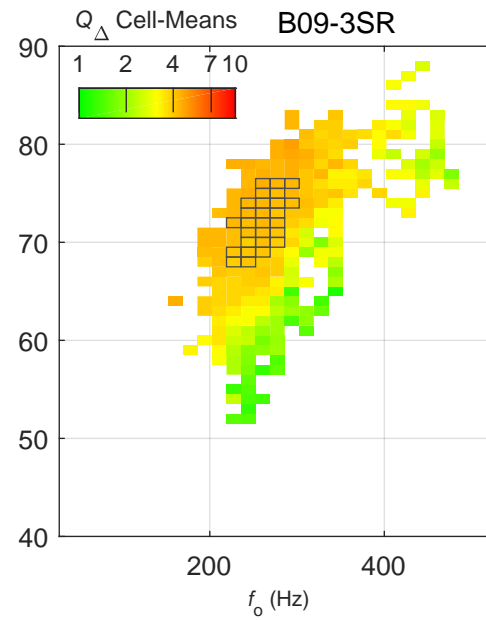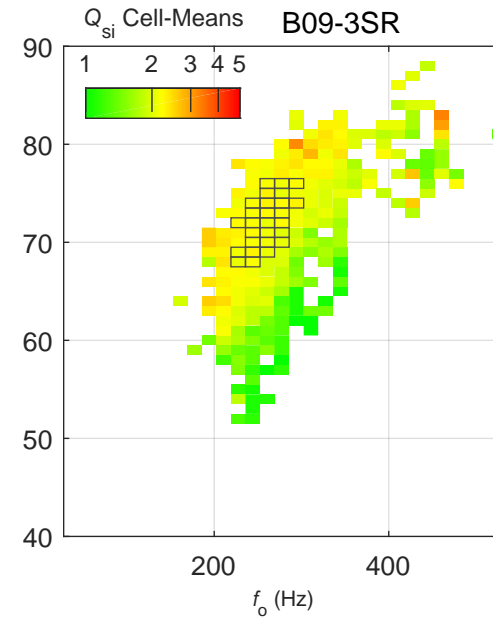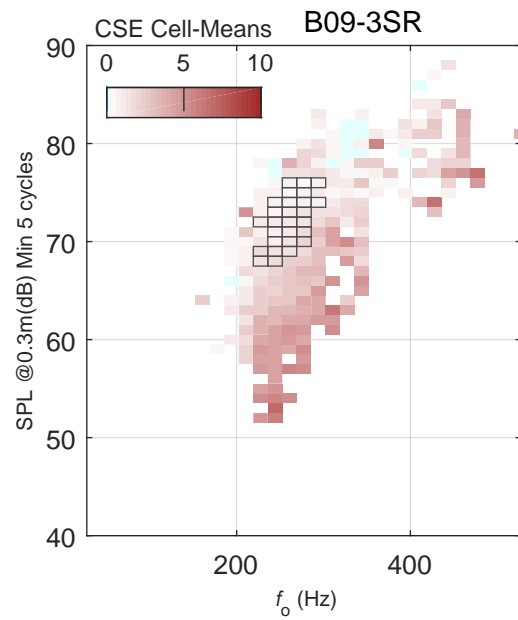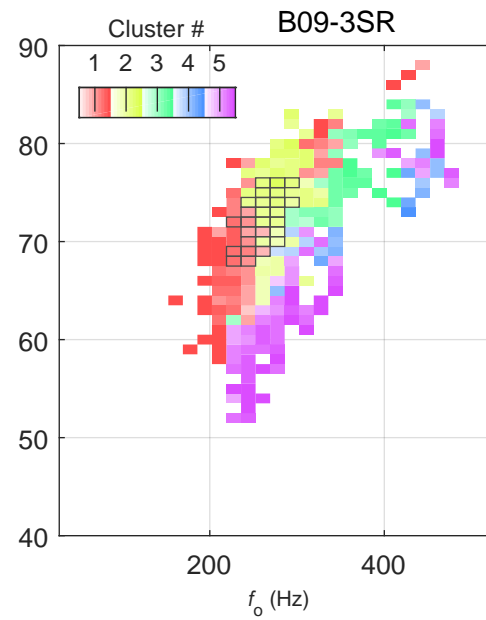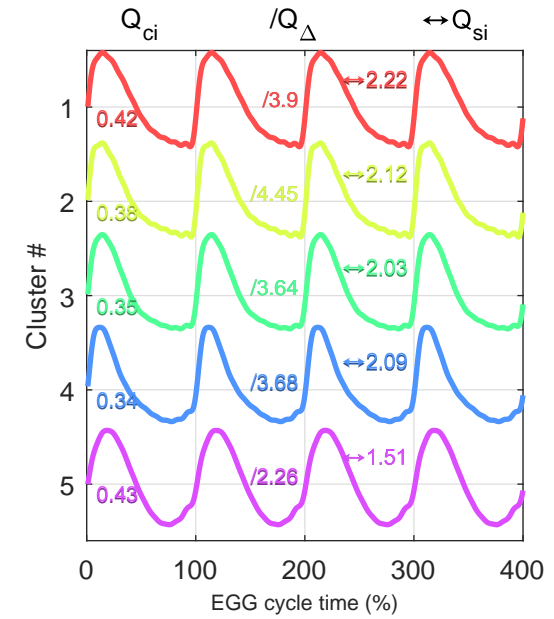

Supplement: Supplementary file 2 [file 1]
